# Supplementary material
Source: HighWire-hosted journal article supplement (https://www.jneurosci.org/content/39/13/2562)
Supplement: inline-supplementary-material-26 [file inline-supplementary-material-26.xlsx]

## Sheet: T1.4.UPPSP.Phenotype
Table 1-4. Distribution (%) of UPPSP scores (European subjects) according to sex and age. Low scores indicate lower rates of sensation seeking, premeditation, positive urgency, negative urgency and premeditation. UPPSP scores expressed as quantile-normalized; each row corresponds to a particular range
		Sensation Seeking
		Sex		Age
Score range	Sample size	M (%)	F (%)	0-30 (%)	30-45 (%)	45-60 (%)	>60 (%)
[-2.26,-0.56]	7829	8.76676	25.654	2.53242	6.33106	9.02176	16.5355
(-0.56,0.04]	5299	10.0857	13.2117	2.24225	5.07364	6.24753	9.73401
(0.04,0.65]	5147	12.7676	9.86151	2.27303	5.5089	6.07606	8.77116
(0.66,2.34]	4470	13.1721	6.48055	2.55001	5.56606	5.36821	6.16839
		Premeditation
		Sex		Age
Score range	Sample size	M (%)	F (%)	0-30 (%)	30-45 (%)	45-60 (%)	>60 (%)
[-1.32,-0.64]	7602	16.7779	16.6023	3.26688	7.46904	8.50531	14.1389
(-0.64,0.19]	7619	15.2762	18.1786	3.05173	7.51734	8.659	14.2267
(0.19,0.71]	4276	7.61395	11.1619	1.83104	4.09239	5.15061	7.70177
(0.71,3.56]	3277	5.18135	9.20787	1.42707	3.37227	4.39536	5.19452
		Positive Urgency
		Sex		Age
Score range	Sample size	M (%)	F (%)	0-30 (%)	30-45 (%)	45-60 (%)	>60 (%)
[-1.11,-0.39]	9886	17.5521	25.9258	3.26326	9.3192	12.1163	18.7791
(-0.39,-0.01]	3052	5.88002	7.54244	1.271	3.11373	3.53593	5.5018
(-0.01,0.32]	2892	5.81406	6.90474	1.39414	3.00818	3.33802	4.97845
(0.32,0.67]	2732	6.04275	5.97238	1.25781	2.59038	3.13572	5.03123
(0.67,1.34]	2727	6.29343	5.69971	1.51289	2.7575	2.90703	4.81573
(1.34,3.21]	1449	3.25446	3.11813	0.888381	1.67561	1.6844	2.1242
		Negative Urgency
		Sex		Age
Score range	Sample size	M (%)	F (%)	0-30 (%)	30-45 (%)	45-60 (%)	>60 (%)
[-1.60,-0.64]	7269	15.0252	16.8633	1.8776	5.52314	8.55889	15.9289
(-0.64,0.01]	5859	11.7175	13.9855	2.32946	5.94429	6.70761	10.7216
(0.01,0.66]	5198	10.1031	12.7002	2.48739	5.39592	6.19873	8.72121
(0.66,2.86]	4469	7.99737	11.6078	2.89976	5.61088	5.2687	5.82584
		Perseverance
		Sex		Age
Score range	Sample size	M (%)	F (%)	0-30 (%)	30-45 (%)	45-60 (%)	>60 (%)
[-1.45,-0.76]	6933	13.4027	16.924	2.31398	5.69529	8.32422	13.9933
(-0.76,0.19]	8479	16.4385	20.6509	3.70063	8.07489	9.55339	15.7605
(0.19,0.67]	3564	7.31377	8.2761	1.60973	4.05931	4.27803	5.6428
(0.67,3.76]	3885	7.70745	9.28656	2.02528	4.63672	4.56673	5.76528

## Sheet: T1.5.BIS.Phenotype
Table 1-5. Distribution (%) of BIS-11 scores (European subjects) according to sex and age. Low scores indicate lower rates of self-reported impulsivity as measured by BIS-11. BIS subscale scores expressed as quantile-normalized, BIS total scores were log10 transformed; each row corresponds to a particular range.
		BIS Total
		Sex		Age
Score range	Sample size	Male (%)	Female (%)	0-30 (%)	30-45 (%)	45-60 (%)	>60 (%)
[31,49]	5615	12.896	13.2263	1.78646	4.36846	6.71784	13.2496
(49,55]	5536	11.7516	14.0033	2.35404	5.50361	6.68062	11.2166
(55,62]	5460	11.0165	14.3847	2.53082	6.25262	6.73645	9.88137
(62,105]	4884	9.47197	13.2496	3.04722	6.52245	6.76902	6.38288
		BIS Attentional
		Sex		Age
Score range	Sample size	Male (%)	Female (%)	0-30 (%)	30-45 (%)	45-60 (%)	>60 (%)
[-2.39,-0.73]	6224	13.1103	15.341	1.49022	4.36094	7.66594	14.9342
(-0.73,-0.14]	4827	9.94697	12.1183	1.75992	4.4798	5.64088	10.1847
(-0.14,0.63]	5982	12.3469	14.9982	2.73816	6.48656	7.22253	10.8978
(0.63,3.75]	4843	9.54928	12.5891	3.63412	7.05796	6.15286	5.29347
		BIS Motor
		Sex		Age
Score range	Sample size	Male (%)	Female (%)	0-30 (%)	30-45 (%)	45-60 (%)	>60 (%)
[-3.44,-0.65]	6820	15.1656	16.1102	2.68733	5.7874	8.05283	14.7482
(-0.65,-0.02]	5367	11.107	13.5055	2.29295	5.29671	6.56241	10.4604
(-0.02,0.58]	4687	9.0067	12.4874	1.86646	5.11786	6.02586	8.4839
(0.58,3.52]	4932	9.84591	12.7717	2.81574	6.42484	6.1772	7.19985
		BIS NonPlanning
		Sex		Age
Score range	Sample size	Male (%)	Female (%)	0-30 (%)	30-45 (%)	45-60 (%)	>60 (%)
[-2.90,-0.77]	5726	12.8752	13.4077	2.36849	5.62288	6.46746	11.8241
(-0.77,-0.12]	5251	10.9887	13.1139	2.27669	5.15928	6.32057	10.3461
(-0.12,0.69]	6322	12.7651	16.2536	2.90554	6.77958	7.71596	11.6176
(0.69,3.97]	4487	8.43202	12.1638	2.14358	5.05829	6.33893	7.05499

## Sheet: T1.6.Drug.Exposure.Phenotype
Table 1-6. Distribution (%) of drug experimentation scores (European subjects) according to sex and age. Scores expressed as quantile-normalized; each row corresponds to a particular range. To calculate drug experimentation one point was given for each drug the subjected endorsed having tried: Alcohol, Marijuana, Cocaine, Methamphetamines, LSD/Magic Mushrooms, Ecstasy, Prescription Stimulants (ta…
		Sex		Age
Score range	Sample size	Male (%)	Female (%)	0-30 (%)	30-45 (%)	45-60 (%)	>60 (%)
[-1.99,-1.01]	5850	10.3137	15.6034	2.93727	5.76821	6.55237	10.6592
(-1.01,0.26]	10095	20.0647	24.6589	3.66383	8.60801	11.0004	21.4514
(0.26,0.70]	2419	4.93975	5.77707	1.02339	2.57842	3.13663	3.97838
(0.70,3.11]	4208	9.44976	9.19281	1.96261	5.39607	5.98972	5.29417

## Sheet: F1.20.Genotyping.QC
Figure 1-20. This table shows the number of SNPs after applying various quality control filters for genotyped and imputed dosage data, and association test results data.
			UPPSP					BIS				Drug Experimentation
			Sensation Seeking	Premeditation	Positive Urgency	Negative Urgency	Perseverance	BIS Total	BIS Attention	BIS Motor	BIS Nonplanning
	Genotyped	Imputed Dosage	Association Results
no filters	1050074	15574220
HWE > 1e-20	948340
genotype call rate > 90%	931193
imputation quality		13071338
MAF < 0.1%			11434023	11455628	11434023	11434023	11914280	11508759	11455070	11434023	11434023	11434023

## Sheet: F1.21.LDSC.SNPheritability
Figure 1-21. LDSC SNP-heritability for UPPSP, BIS and Drug experimentation traits
Questionnaire	Trait	Sample size	SNPs_used	Mean chi^2	Lambda GC	Max chi^2	h2	SE	Lambda GC	Mean Chi^2	Intercept	Intercept SE
UPPSP	Sensation seeking	22745	1137043	1.044	1.041	29.312	0.0811	0.0211	1.0405	1.0436	1.0064	0.0067
	Premeditation	22774	1137067	1.023	1.027	24.573	0.0452	0.0199	1.0285	1.024	1.0034	0.0063
	Positive Urgency	22738	1137043	1.035	1.034	25.756	0.0682	0.0233	1.0345	1.035	1.0037	0.0067
	Negative Urgency	22795	1137043	1.044	1.045	28.753	0.0796	0.0236	1.0436	1.0435	1.0065	0.0067
	Perseverance	22861	1137043	1.034	1.034	25.304	0.0791	0.019	1.0345	1.0341	0.9984	0.0061
BIS	Total score	21495	1143947	1.037	1.036	21.797	0.066	0.0224	1.0345	1.0367	1.0081	0.0069
	Attentional	21876	1137069	1.035	1.035	20.475	0.0541	0.0225	1.0345	1.0352	1.0116	0.0069
	Motor	21806	1137043	1.022	1.012	24.611	0.0443	0.0193	1.0105	1.0209	1.0015	0.0065
	Nonplanning	21786	1137043	1.037	1.031	20.977	0.0657	0.0254	1.0315	1.0371	1.0075	0.0073
	Drug Experimentation	22572	1137043	1.049	1.041	24.991	0.1116	0.0242	1.0405	1.0491	0.9973	0.0073
All SNP-heritability estimates are significantly different from 0 (h^2 <= S.E.*2)

## Sheet: F1.22.Null.Model.Covariates
Figure 1-22. Null model with Covariates
	Sensation Seeking				Premeditation				Positive Urgency				Negative Urgency				Perseveration				BIS Total				BIS Attention				BIS Motor				BIS Nonplanning				Drug Experimentation
Covariates	Estimate	SE	t	Pr(>|t|)	Estimate	SE	t	Pr(>|t|)	Estimate	SE	t	Pr(>|t|)	Estimate	SE	t	Pr(>|t|)	Estimate	SE	t	Pr(>|t|)	Estimate	SE	t	Pr(>|t|)	Estimate	SE	t	Pr(>|t|)	Estimate	SE	t	Pr(>|t|)	Estimate	SE	t	Pr(>|t|)	Estimate	SE	t	Pr(>|t|)
Sex	−0.653	0.0121	−53.9	0	0.186381	0.0124	15	8.9e-51	−0.175	0.01209	−14.5	1.5e-47	0.07581	0.01253	6	1.5e-09	−0.032	0.01247	−2.6	0.0094	0.94454	0.1292	7.3	2.80E−13	0.03506	0.01295	2.7	0.0068	0.08607	0.01328	6.5	9.3e-11	0.11478	0.01343	8.5	1.3e-17	−0.156	0.01259	−12.4	2.8e-35
Age	−0.171	0.00722	−23.7	2.5e-122	−0.023	0.0074	−3.1	0.0017	−0.076	0.00722	−10.5	7.7e-26	−0.213	0.00748	−28.5	7.1e-176	−0.129	0.00744	−17.4	1.3e-67	−2.130	0.0775	−27.5	1.20E−163	−0.306	0.00774	−39.6	0	−0.150	0.00796	−18.9	7.1e-79	−0.080	0.00804	−10.0	2.4e-23	−0.116	0.0075	−15.4	2.2e-53
PC 0	0.038489	0.00601	6.4	1.5e-10	0.000219	0.00616	0	0.97	0.01592	0.006	2.7	0.008	0.00101	0.00622	0.2	0.87	0.0137	0.00619	2.2	0.027	0.11242	0.0642	1.8	0.08	0.00584	0.00643	0.9	0.36	0.01877	0.0066	2.8	0.0045	0.00644	0.00667	1	0.33	−0.013	0.00625	−2.1	0.038
PC 1	−0.010	0.00605	−1.6	0.11	−0.0001	0.00621	−0.0	0.98	0.00179	0.00605	0.3	0.77	0.01954	0.00627	3.1	0.0018	−0.0133	0.00624	−2.1	0.034	0.21927	0.0646	3.4	0.00069	0.03362	0.00648	5.2	2.1e-07	0.00207	0.00664	0.3	0.76	0.01453	0.00672	2.2	0.031	0.0289	0.0063	4.6	4.6e-06
PC 2	−0.004	0.00603	−0.7	0.47	−0.002	0.00618	−0.4	0.72	0.01495	0.00602	2.5	0.013	0.00755	0.00625	1.2	0.23	−0.0291	0.00622	−4.7	2.8e-06	0.00637	0.0644	0.1	0.92	−0.010	0.00645	−1.5	0.13	−0.008	0.00662	−1.2	0.24	0.01084	0.00669	1.6	0.11	−0.014	0.00627	−2.2	0.029
PC 3	0.001006	0.00605	0.2	0.87	−0.017	0.0062	−2.7	0.0063	−0.009	0.00605	−1.5	0.13	−0.008	0.00627	−1.3	0.18	−0.0128	0.00623	−2.0	0.041	−0.156	0.0646	−2.4	0.016	−0.010	0.00647	−1.5	0.12	−0.011	0.00664	−1.7	0.092	−0.020	0.00671	−2.9	0.0032	−0.039	0.0063	−6.3	2.9e-10
PC 4	−0.001	0.00608	−0.1	0.89	0.013747	0.00624	2.2	0.028	−0.002	0.00608	−0.4	0.72	0.00124	0.0063	0.2	0.84	0.0122	0.00627	1.9	0.051	0.12296	0.0649	1.9	0.058	−0.011	0.0065	−1.7	0.08	0.01678	0.00667	2.5	0.012	0.02089	0.00674	3.1	0.002	0.0168	0.00633	2.7	0.0078
Platform v2	0.011019	0.03351	0.3	0.74	−0.032	0.03427	−0.9	0.36	−0.035	0.03338	−1.1	0.29	−0.054	0.03466	−1.5	0.12	0.0352	0.03449	1	0.31	−0.300	0.3559	−0.8	0.4	−0.008	0.03563	−0.2	0.82	−0.031	0.0365	−0.8	0.4	−0.037	0.03704	−1.0	0.32	−0.073	0.03474	−2.1	0.036
Platform v3.1	0.021764	0.0205	1.1	0.29	−0.035	0.02101	−1.7	0.095	0.00251	0.02047	0.1	0.9	−0.043	0.02122	−2.0	0.042	−0.047	0.0211	−2.2	0.026	−0.135	0.2186	−0.6	0.54	−0.002	0.02191	−0.1	0.93	−0.037	0.02246	−1.7	0.098	−0.003	0.02272	−0.1	0.9	0.032	0.02132	1.5	0.13
Platform v4	0.004242	0.01898	0.2	0.82	0.000357	0.01945	0	0.99	0.01074	0.01895	0.6	0.57	−0.052	0.01965	−2.6	0.0081	−0.075	0.01954	−3.8	0.00012	0.41432	0.2025	2	0.041	−0.018	0.02029	−0.9	0.39	0.01635	0.02079	0.8	0.43	0.0844	0.02103	4	6e-05	0.0466	0.01974	2.4	0.018
Results of fitting a model for UPPSP and BIS subscales and drug experimentation based on covariates. Principal components (PC) computed from all SNP data from 23andMe research participants with European ancestry. Effect sizes are in units of standard deviations.

## Sheet: F1.23. GWAS signals
Figure 1-23. Common genetic variants for strongest associations (P<10-6) with UPPSP, BIS and drug experimentation
Questionnaire	Trait	SNP id	chr	cytoband	bp	alleles	EAF	pvalue	effect	95% CI	Variants in credible set	Gene Context
UPPSP	Sensation Seeking	rs139528938	3	3p12.1	85546182	D/I	0.4024	8.3×10−9	0.053	[0.035,0.071]	605	[]---CADM2
		rs10010115	4	4q23	99698254	C/T	0.9258	9.5×10−8	0.087	[0.055,0.120]	29	TSPAN5---[]---EIF4E
		rs192900903	18	18p11.21	11882400	A/C	0.0017	3.3×10−7	−0.617	[-0.854,-0.380]	2	[GNAL]
		rs11568304	11	11q13.1	65421339	C/G	0.009	3.3×10−7	0.237	[0.146,0.328]	2	[RELA]
		rs113371141	2	2q31.1	174601545	C/T	0.9835	1.4×10−6	0.206	[0.122,0.290]	436	CDCA7---[]---SP3
	Premeditation	rs7967742	12	12q14.2	64189065	A/G	0.1012	5.7×10−7	0.081	[0.049,0.113]	132	[TMEM5]
		rs200343341	8	8p21.1	27790846	D/I	0.9698	7.9×10−7	0.13	[0.078,0.181]	10	[SCARA5]
		rs75740990	16	16q12.2	55397254	A/C	0.931	8.3×10−7	−0.087	[-0.122,-0.053]	638	IRX6--[]---MMP2
		rs228942	22	22q12.3	37524619	G/T	0.1791	9.2×10−7	0.056	[0.034,0.079]	322	[IL2RB]
		rs201973602	7	7q22.1	98761002	D/I	0.8869	1.9×10−6	−0.069	[-0.097,-0.041]	245	SMURF1--[]--KPNA7
	Positive Urgency	rs76331386	11	11q24.2	126859796	A/G	0.9178	1.7×10−7	−0.082	[-0.112,-0.051]	7	[KIRREL3]
		rs73155253	12	12q24.33	130013810	A/T	0.7873	5.3×10−7	0.053	[0.032,0.073]	25	[TMEM132D]
		rs186280134	2	2q34	212098925	C/T	0.9911	6.9×10−7	0.258	[0.156,0.360]	102	CPS1---[]---ERBB4
		rs1913223	13	13q21.31	65370523	A/T	0.8943	7.3×10−7	−0.069	[-0.096,-0.042]	94	[]
		rs55680103	10	10p12.2	22822919	D/I	0.6276	8.2×10−7	0.045	[0.027,0.063]	144	SPAG6---[]PIP4K2A
		rs141639699	7	7q31.31	117607214	C/T	0.0471	8.6×10−7	−0.108	[-0.151,-0.065]	80	CTTNBP2--[]---LSM8
	Negative Urgency	rs199694726	22	22q13.1	39987018	D/I	0.6163	3.8×10−8	−0.051	[-0.069,-0.033]	29	[CACNA1I]
		rs1250215	2	2q35	216253039	C/G	0.371	5.1×10−7	0.047	[0.028,0.065]	439	[FN1]
		rs190107978	6	6q12	69831486	C/T	0.0016	7.3×10−7	0.689	[0.416,0.962]	301	[ADGRB3]
		rs139410543	18	18p11.21	13946752	D/I	0.7447	9.1×10−7	−0.051	[-0.071,-0.031]	221	MC2R--[]---ZNF519
		rs6996352	8	8p23.2	4045835	C/T	0.1245	1.2×10−6	0.066	[0.039,0.093]	3295	[CSMD1]
	Perseverance	rs72704488	5	5p15.33	1846792	C/T	0.0159	9.7×10−8	0.23	[0.145,0.314]	11	NDUFS6--[]--IRX4
		rs79498716	10	10q26.3	132976250	C/T	0.9476	1.0×10−7	0.114	[0.072,0.156]	57	[TCERG1L]
		rs200254927	15	15q21.1	47714361	D/I	0.5229	3.5×10−7	0.048	[0.030,0.067]	41	[]---SEMA6D
		rs117585062	14	14q24.1	69343406	C/G	0.0088	6.9×10−7	0.263	[0.159,0.366]	198	[ACTN1]
		rs150485199	8	8q22.1	94630605	C/T	0.9979	6.9×10−7	−0.607	[-0.846,-0.367]	821	TRIQK---[]--FAM92A1
		rs17795215	16	16p12.1	25652253	A/T	0.2181	5.8×10−7	−0.054	[-0.075,-0.033]	77	ZKSCAN2---[]--HS3ST4
BIS	BIS Total	rs117037106	2	2p25.3	3137113	A/G	0.9978	1.0×10−7	−7.153	[-9.785,-4.520]	1894	MYT1L---[]--TSSC1
		rs73060592	7	7p21.2	16315685	C/T	0.9781	2.9×10−7	−1.719	[-2.376,-1.062]	1829	[ISPD]
		rs200444745	7	7p11.2	55432905	D/I	0.9921	1.0×10−6	2.87	[1.719,4.020]	2015	EGFR---[]LANCL2
		rs190115083	1	1q42.2	231326261	C/G	0.0042	1.1×10−6	4.255	[2.544,5.966]	1634	[TRIM67]
		rs143145132	17	17p12	11525314	A/G	0.0241	1.4×10−6	−2.000	[-2.814,-1.187]	1512	[DNAH9]
	BIS Attention	rs142486101	16	16q21	58817728	A/G	0.0082	6.2×10−7	−0.283	[-0.394,-0.172]	2	GOT2--[]
		rs10536720	5	5p14.1	26883152	D/I	0.9044	8.8×10−7	0.093	[0.056,0.130]	34	[CDH9]
		rs115761555	3	3q27.3	187023125	A/G	0.0192	1.4×10−6	−0.216	[-0.304,-0.129]	520	MASP1--[]--RTP4
		rs117594363	8	8q22.3	105875154	A/G	0.9911	2.1×10−6	0.239	[0.140,0.338]	158	LRP12---[]---ZFPM2
		rs116358000	4	4p13	42195268	A/T	0.9902	3.5×10−6	−0.245	[-0.348,-0.141]	660	BEND4--[]---SHISA3
	BIS Motor	rs28669215	22	22q13.31	46619216	C/T	0.0834	5.4×10−8	−0.116	[-0.158,-0.074]	2	[PPARA]
		rs185571697	4	4p16.1	9497813	A/C	0.9973	2.9×10−7	−0.513	[-0.709,-0.317]	3	DEFB131--[]---DRD5
		rs117037106	2	2p25.3	3137113	A/G	0.9979	8.5×10−7	−0.676	[-0.946,-0.407]	553	MYT1L---[]--TSSC1
		rs11729278	4	4q26	114855972	G/T	0.2628	8.5×10−7	0.053	[0.032,0.074]	47	[ARSJ]
		rs188730386	9	9q33.1	121072415	A/G	0.0015	9.5×10−7	−0.691	[-0.968,-0.415]	110	TLR4---[]---BRINP1
	BIS Nonplanning	rs73060592	7	7p21.2	16315685	C/T	0.9782	9.2×10−8	−0.186	[-0.254,-0.118]	2	[ISPD]
		rs139611311	4	4q34.3	181402014	A/G	0.9906	2.1×10−7	0.289	[0.180,0.398]	4	[]
		rs117037106	2	2p25.3	3137113	A/G	0.9979	4.0×10−7	−0.705	[-0.978,-0.433]	125	MYT1L---[]--TSSC1
		rs190713732	12	12q12	43052033	A/G	0.9988	4.3×10−7	0.946	[0.579,1.312]	879	PRICKLE1--[]---ADAMTS20
		rs186095552	6	6p25.3	1950794	C/T	0.0038	1.2×10−6	0.475	[0.284,0.667]	295	[GMDS]
	Drug experimentation	rs138519360	10	10q22.2	76414147	C/T	0.0013	3.5×10−8	0.879	[0.567,1.192]	2	[ADK]
		rs2163971	3	3p12.1	85428726	C/T	0.4321	3.0×10−7	0.048	[0.029,0.066]	509	[]---CADM2
		rs201178674	7	7q31.1	114371577	D/I	0.9957	6.3×10−7	−0.473	[-0.659,-0.287]	46	FOXP2--[]---MDFIC
		rs74150713	1	1q32.2	208047113	C/T	0.9169	1.5×10−6	−0.081	[-0.114,-0.048]	171	CD46--[]-CD34
		rs10829505	10	10q26.3	130629552	C/T	0.6939	2.1×10−6	0.05	[0.029,0.070]	400	MKI67---[]---MGMT
SNP id = marker name; chr = chromosome; bp = position (HG37); alleles = Other Allele/Effect Allele; EAF = effect allele frequency; β = beta effect size; CI = confidence interval; R2 = average score across imputation batches.
The current GWAS are expected to have 41.08% power to detect common variants (MAF >0.40) with effect sizes > 0.05 at p-value 5 x 10-8, and 74.57% power at p-value 5 x 10-6.

## Sheet: F1.24. Candidate SNPs (CADM2)
Figure 1-24. List of identified candidate SNPs (467) in high LD of the independent SNP (rs62252499) associated with UPPSP sensation seeking.
uniqID	rsID	chr	pos	non_effect_allele	effect_allele	MAF	gwasP	beta	se	r2	IndSigSNP	GenomicLocus	nearestGene	dist	func	CADD	RDB	minChrState
3:85409470:A:G	rs11917490	3	85409470	A	G	0.2922	1.22027e-06	0.0456514	0.00940821	0.602228	rs62252499	1	CADM2	0	intronic	1.641	7	5
3:85426840:A:G	rs6776114	3	85426840	A	G	0.2972	1.18895e-06	0.0457242	0.00941322	0.617087	rs62252499	1	CADM2	0	intronic	7.294	7	5
3:85428726:C:T	rs2163971	3	85428726	C	T	0.4354	1.43579e-06	0.042465	0.00881029	0.735622	rs62252499	1	CADM2	0	intronic	11.93	NA	5
3:85434260:C:T	rs11921010	3	85434260	C	T	0.3877	2.2804e-07	0.0452338	0.00874075	0.902825	rs62252499	1	CADM2	0	intronic	1.109	6	5
3:85439136:A:G	rs10511087	3	85439136	A	G	0.3787	1.43174e-07	-0.0461005	0.00876212	0.938886	rs62252499	1	CADM2	0	intronic	6.715	7	5
3:85442208:A:G	rs1368742	3	85442208	A	G	0.3797	2.28602e-07	-0.0453077	0.00875579	0.943322	rs62252499	1	CADM2	0	intronic	3.978	NA	5
3:85443793:A:G	rs1991872	3	85443793	A	G	0.3807	1.75142e-07	0.0457535	0.0087581	0.956707	rs62252499	1	CADM2	0	intronic	0.812	NA	5
3:85446776:A:G	rs12637798	3	85446776	A	G	0.3807	1.86434e-07	-0.0456514	0.00875797	0.956707	rs62252499	1	CADM2	0	intronic	2.919	5	5
3:85454815:C:T	rs12638482	3	85454815	C	T	0.3807	2.06679e-07	-0.045382	0.0087384	0.956897	rs62252499	1	CADM2	0	intronic	1.527	6	5
3:85457240:A:G	rs62250685	3	85457240	A	G	0.3817	2.28606e-07	-0.0452076	0.00873646	0.952909	rs62252499	1	CADM2	0	intronic	2.017	6	5
3:85458577:A:G	rs11918899	3	85458577	A	G	0.3807	3.87634e-07	-0.0443373	0.00873636	0.956897	rs62252499	1	CADM2	0	intronic	1.358	7	14
3:85460131:C:T	rs1549979	3	85460131	C	T	0.3807	2.11248e-07	-0.0453982	0.00874838	0.948217	rs62252499	1	CADM2	0	intronic	3.394	6	9
3:85464125:A:G	rs4856569	3	85464125	A	G	0.3807	2.3867e-07	-0.0451293	0.00873493	0.956897	rs62252499	1	CADM2	0	intronic	0.588	4	15
3:85467972:A:C	rs2053108	3	85467972	A	C	0.3807	3.01312e-07	0.0447388	0.00873336	0.956897	rs62252499	1	CADM2	0	intronic	2.247	6	15
3:85468059:C:T	rs6808400	3	85468059	C	T	0.3807	2.99147e-07	0.0447461	0.00873247	0.956897	rs62252499	1	CADM2	0	intronic	3.392	5	15
3:85468446:A:T	rs62250686	3	85468446	A	T	0.3807	3.1182e-07	0.0446696	0.00873087	0.956897	rs62252499	1	CADM2	0	intronic	5.952	6	15
3:85469041:C:G	rs6780968	3	85469041	C	G	0.3807	3.06461e-07	-0.0446983	0.0087309	0.956897	rs62252499	1	CADM2	0	intronic	1.474	6	15
3:85469353:A:T	rs62250687	3	85469353	A	T	0.3807	3.07258e-07	0.0446921	0.00873053	0.956897	rs62252499	1	CADM2	0	intronic	6.703	6	15
3:85470687:G:T	rs60311538	3	85470687	G	T	0.3807	2.62079e-07	0.044947	0.00872927	0.956897	rs62252499	1	CADM2	0	intronic	11.74	6	5
3:85472033:C:T	rs7636243	3	85472033	C	T	0.3807	3.21591e-07	-0.0446176	0.00873066	0.956897	rs62252499	1	CADM2	0	intronic	2.449	7	5
3:85472227:C:T	rs7650284	3	85472227	C	T	0.3807	3.2168e-07	0.0446176	0.00873075	0.956897	rs62252499	1	CADM2	0	intronic	1.851	7	5
3:85472462:A:G	rs7638953	3	85472462	A	G	0.3807	3.21923e-07	0.0446169	0.00873084	0.956897	rs62252499	1	CADM2	0	intronic	1.342	6	5
3:85474868:C:G	rs4856571	3	85474868	C	G	0.3807	2.66299e-07	0.0449279	0.00873065	0.956897	rs62252499	1	CADM2	0	intronic	0.327	7	5
3:85475647:C:T	rs35894540	3	85475647	C	T	0.3807	2.5884e-07	0.0449829	0.00873229	0.956897	rs62252499	1	CADM2	0	intronic	2.384	6	14
3:85477017:G:T	rs2326309	3	85477017	G	T	0.3807	3.2682e-07	0.0446033	0.00873307	0.956897	rs62252499	1	CADM2	0	intronic	1.814	7	9
3:85477032:A:G	rs2326310	3	85477032	A	G	0.3807	3.26653e-07	0.0446054	0.00873332	0.956897	rs62252499	1	CADM2	0	intronic	6.201	7	9
3:85477685:C:G	rs11920427	3	85477685	C	G	0.3807	3.26317e-07	-0.0446083	0.00873355	0.956897	rs62252499	1	CADM2	0	intronic	0.412	6	15
3:85481412:C:T	rs1865250	3	85481412	C	T	0.3807	2.57526e-07	0.0450045	0.00873486	0.956897	rs62252499	1	CADM2	0	intronic	2.383	NA	7
3:85481979:C:T	rs1433708	3	85481979	C	T	0.3807	3.16233e-07	0.0446748	0.00873642	0.956897	rs62252499	1	CADM2	0	intronic	1.047	NA	7
3:85482595:A:G	rs7609594	3	85482595	A	G	0.3807	3.03169e-07	0.0447434	0.00873624	0.956897	rs62252499	1	CADM2	0	intronic	12	1f	5
3:85482661:A:G	rs35827242	3	85482661	A	G	0.3807	2.39065e-07	0.0451324	0.00873605	0.956897	rs62252499	1	CADM2	0	intronic	15.34	1f	7
3:85485087:C:G	rs2196099	3	85485087	C	G	0.3807	3.0726e-07	0.0447234	0.00873663	0.956897	rs62252499	1	CADM2	0	intronic	6.055	7	9
3:85485230:G:T	rs2217720	3	85485230	G	T	0.3807	3.07289e-07	-0.0447234	0.00873666	0.956897	rs62252499	1	CADM2	0	intronic	0.436	NA	9
3:85487465:A:G	rs9863488	3	85487465	A	G	0.3807	3.01752e-07	0.0447557	0.00873713	0.956897	rs62252499	1	CADM2	0	intronic	3.632	7	9
3:85487482:C:T	rs11929525	3	85487482	C	T	0.3807	2.48541e-07	0.0450641	0.00873514	0.956897	rs62252499	1	CADM2	0	intronic	3.471	6	9
3:85488299:C:T	rs12629036	3	85488299	C	T	0.3807	2.39787e-07	0.0451288	0.0087363	0.956897	rs62252499	1	CADM2	0	intronic	0.099	6	9
3:85488325:C:T	rs1821351	3	85488325	C	T	0.3807	3.06386e-07	-0.0447291	0.00873684	0.956897	rs62252499	1	CADM2	0	intronic	0.136	NA	9
3:85488353:G:T	rs12637461	3	85488353	G	T	0.3807	2.39744e-07	-0.045129	0.00873629	0.956897	rs62252499	1	CADM2	0	intronic	0.612	7	9
3:85488740:A:G	rs1865252	3	85488740	A	G	0.3807	3.07127e-07	-0.0447262	0.00873704	0.956897	rs62252499	1	CADM2	0	intronic	10.32	NA	9
3:85489069:A:C	rs1865251	3	85489069	A	C	0.3807	2.39765e-07	-0.0451289	0.0087363	0.956897	rs62252499	1	CADM2	0	intronic	5.953	NA	9
3:85489304:A:T	rs1897699	3	85489304	A	T	0.3807	2.48283e-07	-0.0450657	0.00873512	0.956897	rs62252499	1	CADM2	0	intronic	6.145	6	9
3:85490947:A:G	rs2082556	3	85490947	A	G	0.3807	2.49018e-07	0.0450602	0.00873499	0.956897	rs62252499	1	CADM2	0	intronic	10.79	6	9
3:85493225:A:G	rs7627044	3	85493225	A	G	0.3807	2.29553e-07	0.0451969	0.00873569	0.956897	rs62252499	1	CADM2	0	intronic	2.211	7	9
3:85494419:C:T	rs4856572	3	85494419	C	T	0.3807	2.29238e-07	0.0451981	0.0087355	0.956897	rs62252499	1	CADM2	0	intronic	0.889	6	9
3:85496758:A:C	rs2033526	3	85496758	A	C	0.3807	2.28919e-07	-0.0451996	0.00873534	0.956897	rs62252499	1	CADM2	0	intronic	12.87	2b	9
3:85497807:A:G	rs11922956	3	85497807	A	G	0.3797	2.76407e-07	-0.0449052	0.00873812	0.952448	rs62252499	1	CADM2	0	intronic	3.2	7	14
3:85498227:A:G	rs12486239	3	85498227	A	G	0.3688	4.27063e-07	0.0450572	0.00891063	0.902419	rs62252499	1	CADM2	0	intronic	0.768	6	14
3:85499035:C:T	rs993137	3	85499035	C	T	0.3807	3.322e-07	-0.0446236	0.00874232	0.956897	rs62252499	1	CADM2	0	intronic	1.646	NA	14
3:85499333:C:T	rs993136	3	85499333	C	T	0.3807	2.38079e-07	0.0451179	0.00873194	0.956897	rs62252499	1	CADM2	0	intronic	1.176	6	14
3:85500389:A:G	rs6762695	3	85500389	A	G	0.3807	2.39025e-07	-0.0451081	0.0087313	0.956897	rs62252499	1	CADM2	0	intronic	3	7	14
3:85501729:A:C	rs1433715	3	85501729	A	C	0.3837	2.6726e-07	0.0450196	0.00874962	0.927347	rs62252499	1	CADM2	0	intronic	0.296	NA	14
3:85502591:C:T	rs993716	3	85502591	C	T	0.3807	2.32235e-07	-0.0451543	0.00873112	0.956897	rs62252499	1	CADM2	0	intronic	1.215	NA	14
3:85504452:A:G	rs2117153	3	85504452	A	G	0.3807	2.26931e-07	0.0451897	0.00873068	0.956897	rs62252499	1	CADM2	0	intronic	0.009	6	5
3:85504949:G:T	rs1433714	3	85504949	G	T	0.3807	2.22494e-07	0.0452228	0.00873087	0.956897	rs62252499	1	CADM2	0	intronic	1.773	NA	7
3:85508427:A:G	rs57630146	3	85508427	A	G	0.3807	1.95858e-07	0.0454449	0.00873369	0.956897	rs62252499	1	CADM2	0	intronic	2.118	7	5
3:85508953:A:G	rs4856573	3	85508953	A	G	0.3807	2.00543e-07	0.0454086	0.0087341	0.956897	rs62252499	1	CADM2	0	intronic	9.886	7	5
3:85510543:A:T	rs62250711	3	85510543	A	T	0.3807	1.79682e-07	-0.045613	0.00873913	0.956897	rs62252499	1	CADM2	0	intronic	1.089	7	5
3:85513000:C:T	rs6774985	3	85513000	C	T	0.3807	1.49008e-07	0.0459218	0.00874037	0.956897	rs62252499	1	CADM2	0	intronic	1.928	7	5
3:85513115:A:C	rs6762267	3	85513115	A	C	0.3807	1.56483e-07	0.0458458	0.00874092	0.956897	rs62252499	1	CADM2	0	intronic	4.831	7	5
3:85513716:C:T	rs62250712	3	85513716	C	T	0.3817	1.22695e-07	-0.0463046	0.00875378	0.952675	rs62252499	1	CADM2	0	intronic	3.055	7	5
3:85513793:A:G	rs62250713	3	85513793	A	G	0.3668	2.878e-07	-0.0453389	0.00883559	0.89602	rs62252499	1	CADM2	0	intronic	0.68	6	5
3:85515776:A:G	rs62250714	3	85515776	A	G	0.3708	1.62957e-07	0.0459671	0.00877656	1	rs62252499	1	CADM2	0	intronic	3.681	6	5
3:85515996:A:G	rs62250715	3	85515996	A	G	0.3708	1.62696e-07	0.0459695	0.00877653	1	rs62252499	1	CADM2	0	intronic	12.25	7	5
3:85518580:A:G	rs2875907	3	85518580	A	G	0.3519	3.36151e-07	-0.0452869	0.00887617	0.920269	rs62252499	1	CADM2	0	intronic	2.745	5	5
3:85519411:C:T	rs1368750	3	85519411	C	T	0.3708	1.52188e-07	0.0460545	0.00877212	1	rs62252499	1	CADM2	0	intronic	0.741	7	5
3:85521017:C:T	rs1155666	3	85521017	C	T	0.3708	1.45996e-07	0.0461237	0.00877252	1	rs62252499	1	CADM2	0	intronic	1.89	6	5
3:85522794:G:T	rs2069123	3	85522794	G	T	0.3708	1.33111e-07	0.0463032	0.00877831	1	rs62252499	1	CADM2	0	intronic	5.503	7	5
3:85524170:C:T	rs11127893	3	85524170	C	T	0.3519	3.15435e-07	-0.0454493	0.00888704	0.920269	rs62252499	1	CADM2	0	intronic	4.588	7	5
3:85524474:A:T	rs67336646	3	85524474	A	T	0.3708	1.39098e-07	0.046204	0.00877293	1	rs62252499	1	CADM2	0	intronic	1.318	5	5
3:85525323:G:T	rs12637791	3	85525323	G	T	0.3519	2.61546e-07	0.0457515	0.00888485	0.920269	rs62252499	1	CADM2	0	intronic	14.26	6	5
3:85526866:C:G	rs7621381	3	85526866	C	G	0.3708	1.36248e-07	-0.0462374	0.00877293	1	rs62252499	1	CADM2	0	intronic	2.665	6	5
3:85527334:A:G	rs1542248	3	85527334	A	G	0.3708	1.35864e-07	0.0462419	0.00877294	1	rs62252499	1	CADM2	0	intronic	1.088	6	5
3:85529628:A:G	rs7614148	3	85529628	A	G	0.3708	1.33226e-07	0.0462735	0.00877293	1	rs62252499	1	CADM2	0	intronic	2.05	5	5
3:85531850:G:T	rs62250719	3	85531850	G	T	0.3708	1.3216e-07	-0.0462863	0.00877291	1	rs62252499	1	CADM2	0	intronic	0.06	7	5
3:85531887:A:C	rs10511085	3	85531887	A	C	0.3708	1.32441e-07	0.0462844	0.0087732	1	rs62252499	1	CADM2	0	intronic	2.738	NA	5
3:85532119:A:G	rs17515196	3	85532119	A	G	0.3708	1.31852e-07	0.0462904	0.00877298	1	rs62252499	1	CADM2	0	intronic	0.457	5	5
3:85534767:A:G	rs1813696	3	85534767	A	G	0.3519	2.71254e-07	-0.04566	0.00887888	0.920269	rs62252499	1	CADM2	0	intronic	1.427	7	5
3:85535856:A:G	rs57872438	3	85535856	A	G	0.3708	1.17195e-07	0.0464856	0.00877409	1	rs62252499	1	CADM2	0	intronic	3.114	6	5
3:85536314:C:T	rs2077839	3	85536314	C	T	0.3519	1.67892e-07	-0.046462	0.00888041	0.920269	rs62252499	1	CADM2	0	intronic	1.938	7	5
3:85538956:A:T	rs55994690	3	85538956	A	T	0.4066	4.29074e-07	0.0455758	0.00901478	0.802818	rs62252499	1	CADM2	0	intronic	5.204	7	14
3:85538984:A:G	rs55897272	3	85538984	A	G	0.3708	3.28458e-07	0.0448778	0.00878845	1	rs62252499	1	CADM2	0	intronic	0.878	7	14
3:85539078:A:G	rs7647981	3	85539078	A	G	0.3519	2.59797e-07	-0.0457308	0.00887867	0.920269	rs62252499	1	CADM2	0	intronic	1.694	7	14
3:85539234:C:T	rs67416405	3	85539234	C	T	0.3519	2.59483e-07	0.0457333	0.00887875	0.920269	rs62252499	1	CADM2	0	intronic	1.53	6	14
3:85539810:G:T	rs11127895	3	85539810	G	T	0.3708	1.16569e-07	0.0464865	0.00877264	1	rs62252499	1	CADM2	0	intronic	2.951	7	14
3:85539816:C:T	rs11127896	3	85539816	C	T	0.3708	1.16432e-07	-0.0464883	0.00877262	1	rs62252499	1	CADM2	0	intronic	2.301	7	14
3:85540764:A:C	rs57755423	3	85540764	A	C	0.3519	2.54964e-07	-0.0457619	0.00887862	0.920269	rs62252499	1	CADM2	0	intronic	2.139	6	14
3:85544210:G:T	rs1551043	3	85544210	G	T	0.3708	1.17876e-07	-0.0464642	0.00877181	1	rs62252499	1	CADM2	0	intronic	1.849	5	5
3:85544283:C:T	rs1551044	3	85544283	C	T	0.3519	2.47663e-07	0.0458098	0.00887854	0.920269	rs62252499	1	CADM2	0	intronic	3.251	5	5
3:85545179:A:T	rs7614552	3	85545179	A	T	0.3519	2.50575e-07	0.0457937	0.00887918	0.920269	rs62252499	1	CADM2	0	intronic	0.291	6	5
3:85545866:C:T	rs10433525	3	85545866	C	T	0.3519	2.45594e-07	0.0458226	0.00887831	0.920269	rs62252499	1	CADM2	0	intronic	1.314	6	5
3:85546701:C:T	rs10433499	3	85546701	C	T	0.3519	2.40891e-07	-0.0458572	0.00887879	0.920269	rs62252499	1	CADM2	0	intronic	0.491	6	5
3:85546798:A:G	rs10433500	3	85546798	A	G	0.3489	8.71901e-08	0.0475226	0.00887966	0.898177	rs62252499	1	CADM2	0	intronic	0.793	7	5
3:85548686:A:G	rs7618124	3	85548686	A	G	0.3519	2.34993e-07	-0.0458995	0.00887902	0.920269	rs62252499	1	CADM2	0	intronic	0.408	6	5
3:85549020:A:G	rs7618429	3	85549020	A	G	0.3708	1.1284e-07	-0.0465287	0.00877077	1	rs62252499	1	CADM2	0	intronic	2.485	7	5
3:85550080:C:T	rs6549030	3	85550080	C	T	0.3519	2.36881e-07	0.045878	0.00887742	0.920269	rs62252499	1	CADM2	0	intronic	0.306	7	5
3:85550969:C:T	rs62250750	3	85550969	C	T	0.3708	1.12208e-07	0.0465355	0.00877037	1	rs62252499	1	CADM2	0	intronic	10.32	6	1
3:85551403:C:T	rs726610	3	85551403	C	T	0.3489	5.21838e-07	-0.0446078	0.00888925	0.90879	rs62252499	1	CADM2	0	intronic	3.471	1f	1
3:85551820:C:T	rs12638798	3	85551820	C	T	0.3519	2.53147e-07	0.0457696	0.00887781	0.920269	rs62252499	1	CADM2	0	intronic	15.69	5	1
3:85552787:C:T	rs4637303	3	85552787	C	T	0.3519	2.36884e-07	-0.045894	0.00888051	0.920269	rs62252499	1	CADM2	0	intronic	4.959	NA	1
3:85554262:A:G	rs12495758	3	85554262	A	G	0.3489	1.90917e-07	0.046242	0.00887879	0.90879	rs62252499	1	CADM2	0	intronic	2.056	3a	1
3:85554582:G:T	rs1449391	3	85554582	G	T	0.3708	1.13518e-07	-0.0465168	0.00877034	1	rs62252499	1	CADM2	0	intronic	0.834	4	1
3:85557571:G:T	rs62250754	3	85557571	G	T	0.3708	1.13979e-07	-0.0465105	0.00877038	1	rs62252499	1	CADM2	0	intronic	0.742	4	2
3:85561808:C:T	rs11127897	3	85561808	C	T	0.3519	2.6366e-07	0.0457026	0.00887796	0.920269	rs62252499	1	CADM2	0	intronic	0.38	6	5
3:85563846:A:C	rs6804845	3	85563846	A	C	0.3708	1.38868e-07	-0.0461852	0.00876886	1	rs62252499	1	CADM2	0	intronic	8.874	6	5
3:85564863:G:T	rs62250758	3	85564863	G	T	0.3708	1.39874e-07	-0.0461794	0.00876997	1	rs62252499	1	CADM2	0	intronic	0.465	6	5
3:85565494:C:T	rs17455991	3	85565494	C	T	0.3519	2.8164e-07	0.0455973	0.0088789	0.920269	rs62252499	1	CADM2	0	intronic	3.095	6	5
3:85565728:G:T	rs1375560	3	85565728	G	T	0.3708	1.4138e-07	-0.0461594	0.00876944	1	rs62252499	1	CADM2	0	intronic	0.83	7	5
3:85569068:A:G	rs1992967	3	85569068	A	G	0.3519	2.81374e-07	0.0455968	0.00887848	0.920269	rs62252499	1	CADM2	0	intronic	5.243	7	7
3:85569172:A:G	rs17515586	3	85569172	A	G	0.3708	1.40846e-07	-0.0461629	0.00876896	1	rs62252499	1	CADM2	0	intronic	10.8	7	7
3:85570959:A:G	rs10511083	3	85570959	A	G	0.3708	1.50424e-07	-0.0460575	0.00876911	1	rs62252499	1	CADM2	0	intronic	4.124	NA	1
3:85571253:A:C	rs6764988	3	85571253	A	C	0.3708	1.5047e-07	-0.0460571	0.00876912	1	rs62252499	1	CADM2	0	intronic	0.447	6	14
3:85571883:C:T	rs1868532	3	85571883	C	T	0.3708	1.50606e-07	-0.0460557	0.00876914	1	rs62252499	1	CADM2	0	intronic	2.256	7	14
3:85572549:C:T	rs1449393	3	85572549	C	T	0.3708	1.50709e-07	-0.0460547	0.00876916	1	rs62252499	1	CADM2	0	intronic	1.774	6	14
3:85572912:C:T	rs1449394	3	85572912	C	T	0.3708	1.50358e-07	-0.0460676	0.00877089	1	rs62252499	1	CADM2	0	intronic	0.531	7	14
3:85573086:C:T	rs4856579	3	85573086	C	T	0.3708	1.50803e-07	0.0460538	0.00876918	1	rs62252499	1	CADM2	0	intronic	3.512	6	14
3:85573333:A:T	rs4856580	3	85573333	A	T	0.3708	1.50865e-07	0.0460532	0.00876919	1	rs62252499	1	CADM2	0	intronic	1.691	6	14
3:85574072:C:T	rs58828944	3	85574072	C	T	0.3708	1.50986e-07	0.046052	0.00876921	1	rs62252499	1	CADM2	0	intronic	1.238	6	7
3:85574282:A:G	rs59825726	3	85574282	A	G	0.3708	1.51036e-07	0.0460516	0.00876922	1	rs62252499	1	CADM2	0	intronic	0.068	7	7
3:85574420:A:G	rs62252462	3	85574420	A	G	0.3708	1.51254e-07	0.0460496	0.0087693	1	rs62252499	1	CADM2	0	intronic	0.105	6	7
3:85574559:A:G	rs62252463	3	85574559	A	G	0.3708	1.52155e-07	0.046042	0.00876967	1	rs62252499	1	CADM2	0	intronic	1.494	5	7
3:85574694:A:G	rs62252464	3	85574694	A	G	0.3708	1.52198e-07	-0.0460416	0.00876969	1	rs62252499	1	CADM2	0	intronic	2.397	7	7
3:85574699:C:T	rs62252465	3	85574699	C	T	0.3708	1.52258e-07	-0.046041	0.0087697	1	rs62252499	1	CADM2	0	intronic	3.151	7	7
3:85574742:A:G	rs62252466	3	85574742	A	G	0.3708	1.523e-07	-0.0460407	0.00876972	1	rs62252499	1	CADM2	0	intronic	2.438	6	7
3:85574780:C:G	rs62252467	3	85574780	C	G	0.3708	1.50802e-07	0.0460581	0.00877	1	rs62252499	1	CADM2	0	intronic	0.327	7	7
3:85575365:C:T	rs1470635	3	85575365	C	T	0.3708	1.5268e-07	-0.0460372	0.00876982	1	rs62252499	1	CADM2	0	intronic	2.064	7	5
3:85575441:A:C	rs1470636	3	85575441	A	C	0.3708	1.5271e-07	-0.0460369	0.00876983	1	rs62252499	1	CADM2	0	intronic	2.136	6	5
3:85575519:C:T	rs7427346	3	85575519	C	T	0.3708	1.54118e-07	0.0460232	0.00877005	1	rs62252499	1	CADM2	0	intronic	0.779	7	5
3:85575690:G:T	rs35738543	3	85575690	G	T	0.3708	1.53995e-07	0.0460249	0.00877012	1	rs62252499	1	CADM2	0	intronic	0.801	5	5
3:85575723:A:C	rs17456263	3	85575723	A	C	0.3708	1.54004e-07	0.0460249	0.00877013	1	rs62252499	1	CADM2	0	intronic	5.72	5	5
3:85575775:C:T	rs35701422	3	85575775	C	T	0.3708	1.69775e-07	0.0459019	0.00877681	1	rs62252499	1	CADM2	0	intronic	1.958	6	5
3:85575797:C:T	rs12491722	3	85575797	C	T	0.3519	3.1298e-07	0.0454252	0.00887978	0.920269	rs62252499	1	CADM2	0	intronic	0.701	6	5
3:85575844:A:G	rs59967234	3	85575844	A	G	0.3708	1.54126e-07	-0.0460238	0.00877017	1	rs62252499	1	CADM2	0	intronic	1.924	7	5
3:85575986:A:G	rs59225869	3	85575986	A	G	0.3708	1.54202e-07	-0.0460239	0.00877034	1	rs62252499	1	CADM2	0	intronic	2.908	6	5
3:85576091:C:T	rs60427790	3	85576091	C	T	0.3708	1.53652e-07	0.0460683	0.0087777	1	rs62252499	1	CADM2	0	intronic	2.94	6	9
3:85576104:C:T	rs56778912	3	85576104	C	T	0.3708	1.53658e-07	-0.0460683	0.00877771	1	rs62252499	1	CADM2	0	intronic	0.017	7	9
3:85576458:A:C	rs66505109	3	85576458	A	C	0.3708	1.54523e-07	-0.0460211	0.00877045	1	rs62252499	1	CADM2	0	intronic	0.453	7	9
3:85576648:A:G	rs7628237	3	85576648	A	G	0.3708	1.54522e-07	-0.0460213	0.00877049	1	rs62252499	1	CADM2	0	intronic	1.16	6	9
3:85577006:A:G	rs56777875	3	85577006	A	G	0.3708	1.54585e-07	0.0460208	0.00877051	1	rs62252499	1	CADM2	0	intronic	4.069	6	14
3:85577166:A:G	rs4856581	3	85577166	A	G	0.3708	1.48719e-07	0.0461188	0.00877727	1	rs62252499	1	CADM2	0	intronic	6.769	7	14
3:85577269:A:G	rs4856583	3	85577269	A	G	0.3708	1.54757e-07	-0.0460207	0.00877085	1	rs62252499	1	CADM2	0	intronic	9.131	6	14
3:85577537:A:G	rs1449389	3	85577537	A	G	0.3708	1.54991e-07	-0.0460201	0.0087712	1	rs62252499	1	CADM2	0	intronic	2.132	7	14
3:85577691:C:G	rs57671246	3	85577691	C	G	0.3708	1.28099e-07	-0.0463281	0.00877131	1	rs62252499	1	CADM2	0	intronic	1.721	7	14
3:85577703:A:G	rs1449390	3	85577703	A	G	0.3708	1.28122e-07	0.0463278	0.00877133	1	rs62252499	1	CADM2	0	intronic	0.994	7	14
3:85578035:A:G	rs10511078	3	85578035	A	G	0.3519	2.689e-07	0.0456818	0.0088803	0.920269	rs62252499	1	CADM2	0	intronic	0.369	NA	14
3:85578077:A:G	rs55939743	3	85578077	A	G	0.3708	1.28347e-07	0.046329	0.00877208	1	rs62252499	1	CADM2	0	intronic	2.343	7	14
3:85578129:A:G	rs62252495	3	85578129	A	G	0.3708	1.55287e-07	0.0460176	0.0087713	1	rs62252499	1	CADM2	0	intronic	3.656	6	14
3:85578180:A:G	rs62252496	3	85578180	A	G	0.3708	1.5501e-07	0.0460224	0.00877167	1	rs62252499	1	CADM2	0	intronic	0.395	6	14
3:85578463:C:T	rs62252497	3	85578463	C	T	0.3708	1.41828e-07	-0.0461968	0.00877752	1	rs62252499	1	CADM2	0	intronic	2.374	6	14
3:85578725:A:C	rs56187922	3	85578725	A	C	0.3708	1.55514e-07	0.0460156	0.00877137	1	rs62252499	1	CADM2	0	intronic	5.107	7	14
3:85578841:A:C	rs12633657	3	85578841	A	C	0.3519	3.31905e-07	0.0453353	0.00888146	0.920269	rs62252499	1	CADM2	0	intronic	1.422	7	14
3:85579606:A:G	rs62252499	3	85579606	A	G	0.3708	6.63031e-09	-0.0526835	0.00908234	1	rs62252499	1	CADM2	0	intronic	0.372	6	14
3:85579610:C:T	rs62252500	3	85579610	C	T	0.3708	9.35442e-09	-0.0520702	0.00906735	1	rs62252499	1	CADM2	0	intronic	0.358	6	14
3:85579638:A:G	rs62252501	3	85579638	A	G	0.3708	1.67468e-07	-0.046791	0.00894249	1	rs62252499	1	CADM2	0	intronic	0.279	6	14
3:85580328:A:T	rs4856584	3	85580328	A	T	0.3519	3.48124e-07	-0.0452717	0.00888473	0.920269	rs62252499	1	CADM2	0	intronic	1.396	6	14
3:85580588:A:G	rs17516256	3	85580588	A	G	0.3708	1.40694e-07	0.0461863	0.00877306	1	rs62252499	1	CADM2	0	intronic	2.729	6	15
3:85581099:A:G	rs11923525	3	85581099	A	G	0.3708	1.71566e-07	0.0458743	0.00877479	1	rs62252499	1	CADM2	0	intronic	0.853	7	15
3:85581105:A:T	rs35608699	3	85581105	A	T	0.3708	1.66889e-07	0.045917	0.00877437	1	rs62252499	1	CADM2	0	intronic	4.075	6	15
3:85581231:A:G	rs77657121	3	85581231	A	G	0.3708	1.57224e-07	0.0460021	0.00877217	1	rs62252499	1	CADM2	0	intronic	1.593	7	15
3:85581386:A:G	rs17516284	3	85581386	A	G	0.3708	1.58619e-07	0.0459866	0.00877195	1	rs62252499	1	CADM2	0	intronic	2.632	6	15
3:85581758:C:G	rs62252503	3	85581758	C	G	0.3718	1.60843e-07	0.0459944	0.00877774	0.995584	rs62252499	1	CADM2	0	intronic	0.121	7	9
3:85581779:C:T	rs62252505	3	85581779	C	T	0.3718	1.61621e-07	-0.0459835	0.00877715	0.995584	rs62252499	1	CADM2	0	intronic	1.49	6	9
3:85581991:A:C	rs113351222	3	85581991	A	C	0.3708	1.73853e-07	-0.0459678	0.00879681	1	rs62252499	1	CADM2	0	intronic	0.011	6	9
3:85582026:C:T	rs62252506	3	85582026	C	T	0.3708	5.07017e-07	0.0441876	0.00879581	1	rs62252499	1	CADM2	0	intronic	0.309	6	14
3:85582078:C:T	rs62252507	3	85582078	C	T	0.3708	1.58658e-07	-0.0459863	0.00877196	1	rs62252499	1	CADM2	0	intronic	2.341	6	14
3:85582231:A:G	rs62252508	3	85582231	A	G	0.3519	3.45497e-07	0.0452714	0.00888217	0.920269	rs62252499	1	CADM2	0	intronic	0.016	6	14
3:85582245:C:T	rs62252509	3	85582245	C	T	0.3708	1.58942e-07	-0.0459832	0.00877192	1	rs62252499	1	CADM2	0	intronic	1.358	6	14
3:85582643:C:T	rs17456763	3	85582643	C	T	0.3708	1.58988e-07	-0.0459828	0.00877193	1	rs62252499	1	CADM2	0	intronic	0.917	5	14
3:85582680:A:G	rs17516346	3	85582680	A	G	0.3708	1.59087e-07	-0.0459818	0.00877194	1	rs62252499	1	CADM2	0	intronic	3.866	1f	14
3:85582713:A:G	rs67018424	3	85582713	A	G	0.3708	1.59228e-07	0.0459805	0.00877197	1	rs62252499	1	CADM2	0	intronic	4.801	5	14
3:85582939:A:T	rs17456820	3	85582939	A	T	0.3708	1.59321e-07	0.0459796	0.00877198	1	rs62252499	1	CADM2	0	intronic	21.5	5	14
3:85583193:A:G	rs10511076	3	85583193	A	G	0.3708	1.5935e-07	-0.0459794	0.00877199	1	rs62252499	1	CADM2	0	intronic	0.683	NA	7
3:85583403:A:G	rs10511075	3	85583403	A	G	0.3708	1.59478e-07	0.0459782	0.00877201	1	rs62252499	1	CADM2	0	intronic	3.311	NA	7
3:85583471:A:G	rs58919842	3	85583471	A	G	0.3708	1.59571e-07	0.0459773	0.00877201	1	rs62252499	1	CADM2	0	intronic	2.222	6	7
3:85583506:C:G	rs59491876	3	85583506	C	G	0.3708	1.59649e-07	-0.0459765	0.00877202	1	rs62252499	1	CADM2	0	intronic	0.782	6	7
3:85583542:A:G	rs59770976	3	85583542	A	G	0.3708	1.59759e-07	-0.0459755	0.00877203	1	rs62252499	1	CADM2	0	intronic	2.073	7	7
3:85583608:C:T	rs12629607	3	85583608	C	T	0.3489	6.71884e-07	0.0441935	0.00889321	0.90879	rs62252499	1	CADM2	0	intronic	0.087	7	7
3:85583745:A:G	rs56779213	3	85583745	A	G	0.3708	1.59874e-07	-0.0459744	0.00877205	1	rs62252499	1	CADM2	0	intronic	4.937	7	7
3:85583882:C:G	rs17516470	3	85583882	C	G	0.3708	1.59926e-07	-0.0459739	0.00877206	1	rs62252499	1	CADM2	0	intronic	6.551	6	7
3:85583927:A:T	rs57756567	3	85583927	A	T	0.3708	1.60028e-07	0.045973	0.00877207	1	rs62252499	1	CADM2	0	intronic	3.371	6	7
3:85583945:C:T	rs17516504	3	85583945	C	T	0.3708	1.60076e-07	0.0459725	0.00877208	1	rs62252499	1	CADM2	0	intronic	2.279	6	7
3:85584478:A:T	rs62252512	3	85584478	A	T	0.3708	1.60507e-07	-0.0459686	0.00877216	1	rs62252499	1	CADM2	0	intronic	11.76	7	7
3:85585025:A:G	rs17516546	3	85585025	A	G	0.3748	1.60842e-07	-0.0459655	0.00877223	0.9828	rs62252499	1	CADM2	0	intronic	4.968	5	5
3:85585035:C:T	rs73130364	3	85585035	C	T	0.3748	3.653e-08	0.0493853	0.00896734	0.9828	rs62252499	1	CADM2	0	intronic	2.98	5	5
3:85585036:A:G	rs73130366	3	85585036	A	G	0.3748	3.6519e-08	0.0493858	0.00896734	0.9828	rs62252499	1	CADM2	0	intronic	5.166	5	5
3:85585091:A:G	rs66625173	3	85585091	A	G	0.3708	1.61089e-07	-0.0459632	0.00877225	1	rs62252499	1	CADM2	0	intronic	3.22	5	5
3:85585144:C:G	rs17516580	3	85585144	C	G	0.3708	1.75106e-07	0.0459125	0.00878846	1	rs62252499	1	CADM2	0	intronic	0.051	5	5
3:85585277:C:T	rs17457050	3	85585277	C	T	0.3708	1.62637e-07	-0.0459486	0.00877242	1	rs62252499	1	CADM2	0	intronic	2.698	6	5
3:85585340:A:T	rs67544605	3	85585340	A	T	0.3708	1.4936e-07	-0.0461321	0.00878112	1	rs62252499	1	CADM2	0	intronic	1.041	7	5
3:85585431:A:G	rs17516683	3	85585431	A	G	0.3708	1.49508e-07	0.0461306	0.00878114	1	rs62252499	1	CADM2	0	intronic	1.433	7	5
3:85585552:A:T	rs66632973	3	85585552	A	T	0.3708	1.49698e-07	-0.0461351	0.00878239	1	rs62252499	1	CADM2	0	intronic	0.811	6	5
3:85585646:A:G	rs66781790	3	85585646	A	G	0.3708	1.49909e-07	-0.0461265	0.00878118	1	rs62252499	1	CADM2	0	intronic	1.291	6	5
3:85585860:A:G	rs17457189	3	85585860	A	G	0.3708	1.49494e-07	0.0461386	0.00878264	1	rs62252499	1	CADM2	0	intronic	10.73	6	5
3:85586521:A:T	rs17457217	3	85586521	A	T	0.3708	1.50471e-07	-0.0461206	0.00878121	1	rs62252499	1	CADM2	0	intronic	6.284	6	5
3:85586806:A:G	rs2167046	3	85586806	A	G	0.3728	1.54859e-07	0.0460733	0.00878108	0.991246	rs62252499	1	CADM2	0	intronic	4.266	6	5
3:85586835:A:T	rs2167047	3	85586835	A	T	0.3728	1.54991e-07	-0.046072	0.00878108	0.991246	rs62252499	1	CADM2	0	intronic	5.069	6	5
3:85586921:C:T	rs2122235	3	85586921	C	T	0.3708	1.55098e-07	-0.046071	0.0087811	1	rs62252499	1	CADM2	0	intronic	1.884	7	5
3:85587537:C:T	rs62252513	3	85587537	C	T	0.3708	1.68901e-07	-0.0458873	0.00877243	1	rs62252499	1	CADM2	0	intronic	11.03	7	5
3:85587710:A:C	rs17516857	3	85587710	A	C	0.3708	1.69317e-07	-0.0458834	0.00877245	1	rs62252499	1	CADM2	0	intronic	0.914	7	5
3:85587729:C:G	rs11127898	3	85587729	C	G	0.3519	3.94577e-07	-0.0450715	0.00888694	0.920269	rs62252499	1	CADM2	0	intronic	3.845	7	5
3:85588070:C:T	rs34467301	3	85588070	C	T	0.3708	2.01809e-07	0.04562	0.00877673	1	rs62252499	1	CADM2	0	intronic	11.53	6	5
3:85588205:C:T	rs35438712	3	85588205	C	T	0.3708	1.71524e-07	0.0458631	0.00877258	1	rs62252499	1	CADM2	0	intronic	1.398	6	5
3:85588375:G:T	rs17457377	3	85588375	G	T	0.3708	1.71576e-07	0.0458623	0.00877252	1	rs62252499	1	CADM2	0	intronic	2.064	7	5
3:85588494:C:T	rs62252516	3	85588494	C	T	0.3708	1.71776e-07	-0.0458605	0.00877254	1	rs62252499	1	CADM2	0	intronic	3.424	6	5
3:85588962:A:C	rs17457426	3	85588962	A	C	0.3708	1.74238e-07	-0.045838	0.00877265	1	rs62252499	1	CADM2	0	intronic	1.846	7	5
3:85589010:C:T	rs17457454	3	85589010	C	T	0.3708	1.74502e-07	0.0458355	0.00877265	1	rs62252499	1	CADM2	0	intronic	6.605	6	5
3:85589022:A:T	rs62252518	3	85589022	A	T	0.3708	1.74567e-07	-0.0458349	0.00877265	1	rs62252499	1	CADM2	0	intronic	7.246	7	5
3:85589246:A:T	rs62252519	3	85589246	A	T	0.3708	1.74861e-07	0.0458322	0.00877265	1	rs62252499	1	CADM2	0	intronic	4.865	6	5
3:85589275:A:G	rs6766493	3	85589275	A	G	0.3708	1.7496e-07	0.0458313	0.00877265	1	rs62252499	1	CADM2	0	intronic	8.67	6	5
3:85589580:C:T	rs6779501	3	85589580	C	T	0.3708	1.72519e-07	0.0458565	0.00877311	1	rs62252499	1	CADM2	0	intronic	0.456	7	5
3:85589897:A:G	rs4856271	3	85589897	A	G	0.3708	1.75174e-07	-0.0458294	0.00877267	1	rs62252499	1	CADM2	0	intronic	0.632	7	5
3:85590253:A:T	rs58796643	3	85590253	A	T	0.3718	1.49271e-07	-0.046111	0.00877691	0.995584	rs62252499	1	CADM2	0	intronic	1.55	6	5
3:85590266:A:T	rs60597959	3	85590266	A	T	0.3718	1.49389e-07	0.0461097	0.00877691	0.995584	rs62252499	1	CADM2	0	intronic	5.388	6	5
3:85590271:C:T	rs62253961	3	85590271	C	T	0.3718	1.49478e-07	-0.0461089	0.00877695	0.995584	rs62252499	1	CADM2	0	intronic	0.643	7	5
3:85590444:A:T	rs61586601	3	85590444	A	T	0.3718	1.76099e-07	-0.0458206	0.00877263	0.995584	rs62252499	1	CADM2	0	intronic	1.581	7	5
3:85590701:C:G	rs17517080	3	85590701	C	G	0.3718	1.76297e-07	-0.0458188	0.00877263	0.995584	rs62252499	1	CADM2	0	intronic	0.526	7	5
3:85591108:A:G	rs17517121	3	85591108	A	G	0.3708	1.7679e-07	0.0458142	0.00877261	1	rs62252499	1	CADM2	0	intronic	0.968	6	5
3:85591229:A:C	rs17517142	3	85591229	A	C	0.3708	1.76701e-07	-0.045815	0.00877262	1	rs62252499	1	CADM2	0	intronic	1.183	7	5
3:85591363:C:T	rs17457642	3	85591363	C	T	0.3708	1.76873e-07	-0.0458134	0.00877261	1	rs62252499	1	CADM2	0	intronic	7.889	7	5
3:85591451:C:T	rs17457669	3	85591451	C	T	0.3708	1.77506e-07	0.045807	0.0087725	1	rs62252499	1	CADM2	0	intronic	1.672	6	5
3:85591586:C:G	rs17517238	3	85591586	C	G	0.3708	1.77794e-07	0.0458043	0.00877249	1	rs62252499	1	CADM2	0	intronic	0.054	6	5
3:85591785:A:T	rs66922686	3	85591785	A	T	0.3708	1.78547e-07	-0.0457973	0.00877246	1	rs62252499	1	CADM2	0	intronic	7.317	6	5
3:85591981:C:T	rs7620313	3	85591981	C	T	0.3708	1.78961e-07	-0.0457934	0.00877243	1	rs62252499	1	CADM2	0	intronic	1.56	7	5
3:85592342:A:C	rs1900918	3	85592342	A	C	0.3708	1.7953e-07	0.0457879	0.00877238	1	rs62252499	1	CADM2	0	intronic	0.402	7	5
3:85592549:C:G	rs2326318	3	85592549	C	G	0.3708	1.79939e-07	-0.0457841	0.00877235	1	rs62252499	1	CADM2	0	intronic	1.591	7	5
3:85592750:A:T	rs6790090	3	85592750	A	T	0.3708	1.80307e-07	0.0457806	0.00877231	1	rs62252499	1	CADM2	0	intronic	3.682	6	5
3:85592983:G:T	rs6777456	3	85592983	G	T	0.3708	1.80592e-07	-0.0457778	0.00877227	1	rs62252499	1	CADM2	0	intronic	0.561	6	5
3:85592988:A:G	rs6777458	3	85592988	A	G	0.3708	1.8075e-07	0.0457763	0.00877225	1	rs62252499	1	CADM2	0	intronic	1.708	7	5
3:85593146:A:C	rs17517273	3	85593146	A	C	0.3708	1.80931e-07	-0.0457745	0.00877223	1	rs62252499	1	CADM2	0	intronic	0.303	7	5
3:85593584:C:T	rs6780346	3	85593584	C	T	0.3718	1.8123e-07	-0.0457716	0.00877219	0.995554	rs62252499	1	CADM2	0	intronic	0.305	7	5
3:85593673:A:G	rs6804626	3	85593673	A	G	0.3718	1.85394e-07	-0.0457298	0.00877126	0.995554	rs62252499	1	CADM2	0	intronic	2.744	7	5
3:85594428:A:C	rs6807666	3	85594428	A	C	0.3519	4.16244e-07	-0.0449588	0.00888257	0.920269	rs62252499	1	CADM2	0	intronic	0.233	6	5
3:85594562:A:G	rs11127899	3	85594562	A	G	0.3708	1.8654e-07	-0.0457177	0.00877085	1	rs62252499	1	CADM2	0	intronic	4.953	6	5
3:85594599:A:G	rs11127900	3	85594599	A	G	0.3708	1.86775e-07	-0.0457154	0.00877082	1	rs62252499	1	CADM2	0	intronic	1.387	6	5
3:85594695:A:G	rs10865610	3	85594695	A	G	0.3698	2.26138e-07	-0.0454132	0.00877276	0.995563	rs62252499	1	CADM2	0	intronic	2.466	6	5
3:85594846:A:C	rs1551045	3	85594846	A	C	0.3708	1.8695e-07	-0.0457136	0.00877075	1	rs62252499	1	CADM2	0	intronic	0.27	5	5
3:85594864:A:T	rs1463203	3	85594864	A	T	0.3708	1.863e-07	-0.0457193	0.00877076	1	rs62252499	1	CADM2	0	intronic	1.887	5	5
3:85595133:C:T	rs1463204	3	85595133	C	T	0.3708	1.85889e-07	0.0457229	0.00877077	1	rs62252499	1	CADM2	0	intronic	2.499	6	5
3:85595397:C:G	rs1551046	3	85595397	C	G	0.3708	1.76285e-07	0.045811	0.00877111	1	rs62252499	1	CADM2	0	intronic	2.017	7	5
3:85595857:G:T	rs1551047	3	85595857	G	T	0.3708	1.75416e-07	-0.0458188	0.00877106	1	rs62252499	1	CADM2	0	intronic	2.843	6	5
3:85595945:G:T	rs1551048	3	85595945	G	T	0.3708	1.75196e-07	-0.0458208	0.00877106	1	rs62252499	1	CADM2	0	intronic	11.11	5	5
3:85596219:A:G	rs6765881	3	85596219	A	G	0.3708	1.74756e-07	-0.0458248	0.00877105	1	rs62252499	1	CADM2	0	intronic	0.456	6	5
3:85596323:A:G	rs6765991	3	85596323	A	G	0.3708	1.74146e-07	-0.0458305	0.00877105	1	rs62252499	1	CADM2	0	intronic	9.838	6	5
3:85596432:A:G	rs1463205	3	85596432	A	G	0.3708	1.74069e-07	0.0458312	0.00877105	1	rs62252499	1	CADM2	0	intronic	19.34	7	5
3:85596479:C:T	rs4502590	3	85596479	C	T	0.3708	1.73608e-07	-0.0458354	0.00877103	1	rs62252499	1	CADM2	0	intronic	18.32	NA	5
3:85596597:A:T	rs1463206	3	85596597	A	T	0.3708	1.7339e-07	0.0458375	0.00877103	1	rs62252499	1	CADM2	0	intronic	5.68	5	5
3:85596704:C:T	rs1463207	3	85596704	C	T	0.3698	1.72488e-07	-0.0458458	0.00877101	0.995554	rs62252499	1	CADM2	0	intronic	1.687	5	5
3:85596712:A:C	rs1463208	3	85596712	A	C	0.3698	1.71921e-07	0.0458506	0.0087709	0.995554	rs62252499	1	CADM2	0	intronic	0.333	5	5
3:85596855:C:T	rs4603966	3	85596855	C	T	0.3708	1.71225e-07	0.0458569	0.00877086	1	rs62252499	1	CADM2	0	intronic	0.359	NA	5
3:85597009:C:T	rs62253964	3	85597009	C	T	0.3708	1.70995e-07	-0.0458591	0.00877085	1	rs62252499	1	CADM2	0	intronic	3.193	7	5
3:85597014:A:G	rs62253965	3	85597014	A	G	0.3708	1.70767e-07	0.0458612	0.00877084	1	rs62252499	1	CADM2	0	intronic	1.561	7	5
3:85597135:A:G	rs2326319	3	85597135	A	G	0.3519	3.81056e-07	0.0451089	0.0088827	0.920269	rs62252499	1	CADM2	0	intronic	1.08	7	5
3:85597693:C:T	rs2875908	3	85597693	C	T	0.3708	1.70445e-07	0.0458643	0.00877085	1	rs62252499	1	CADM2	0	intronic	11.95	6	14
3:85598244:A:T	rs4856585	3	85598244	A	T	0.3698	1.70312e-07	0.0458656	0.00877086	0.995563	rs62252499	1	CADM2	0	intronic	0.837	6	14
3:85598260:A:G	rs4856273	3	85598260	A	G	0.3698	1.68055e-07	0.0458877	0.00877095	0.995563	rs62252499	1	CADM2	0	intronic	0.038	7	14
3:85598481:C:T	rs6792295	3	85598481	C	T	0.3698	1.67276e-07	0.0458955	0.008771	0.995563	rs62252499	1	CADM2	0	intronic	3.152	7	14
3:85599014:A:T	rs6549033	3	85599014	A	T	0.3708	1.67058e-07	-0.0458978	0.00877103	1	rs62252499	1	CADM2	0	intronic	0.699	7	14
3:85599066:C:G	rs6549034	3	85599066	C	G	0.3708	1.53901e-07	-0.0461451	0.00879283	1	rs62252499	1	CADM2	0	intronic	1.356	6	14
3:85599067:C:T	rs6549035	3	85599067	C	T	0.3519	3.60522e-07	0.0453043	0.00890274	0.920269	rs62252499	1	CADM2	0	intronic	0.097	6	14
3:85599081:C:T	rs7637527	3	85599081	C	T	0.3708	1.53868e-07	0.0461455	0.00879285	1	rs62252499	1	CADM2	0	intronic	0.721	7	14
3:85599325:A:G	rs62253966	3	85599325	A	G	0.3708	1.67049e-07	0.0458981	0.00877106	1	rs62252499	1	CADM2	0	intronic	0.686	7	14
3:85599391:G:T	rs4301022	3	85599391	G	T	0.3708	2.64112e-07	-0.0452916	0.00879867	1	rs62252499	1	CADM2	0	intronic	0.186	NA	14
3:85599588:A:G	rs62253967	3	85599588	A	G	0.3519	3.66157e-07	0.0451867	0.00888476	0.920269	rs62252499	1	CADM2	0	intronic	1.392	7	14
3:85599601:C:T	rs62253968	3	85599601	C	T	0.3519	3.66216e-07	0.0451865	0.00888478	0.920269	rs62252499	1	CADM2	0	intronic	2.513	7	14
3:85599711:A:G	rs17458504	3	85599711	A	G	0.3708	1.54841e-07	0.0460445	0.00877555	1	rs62252499	1	CADM2	0	intronic	2.37	7	14
3:85599792:A:G	rs62253969	3	85599792	A	G	0.3708	1.66705e-07	0.0459016	0.00877111	1	rs62252499	1	CADM2	0	intronic	3.446	7	14
3:85599825:C:T	rs17518082	3	85599825	C	T	0.3708	1.73468e-07	-0.0459551	0.00879368	1	rs62252499	1	CADM2	0	intronic	0.292	7	14
3:85599868:G:T	rs17458574	3	85599868	G	T	0.3708	1.66612e-07	0.0459026	0.00877112	1	rs62252499	1	CADM2	0	intronic	3.206	6	14
3:85599918:C:T	rs6783137	3	85599918	C	T	0.3708	3.06973e-07	-0.0450026	0.00879087	1	rs62252499	1	CADM2	0	intronic	4.634	7	14
3:85599920:C:G	rs6783138	3	85599920	C	G	0.3708	3.06946e-07	-0.0450028	0.00879088	1	rs62252499	1	CADM2	0	intronic	6.91	7	14
3:85599977:C:T	rs17458609	3	85599977	C	T	0.3708	3.06681e-07	-0.0450043	0.00879089	1	rs62252499	1	CADM2	0	intronic	2.808	7	14
3:85600077:C:T	rs1449405	3	85600077	C	T	0.3708	1.66394e-07	0.0459048	0.00877114	1	rs62252499	1	CADM2	0	intronic	3.654	7	14
3:85600212:A:C	rs1449406	3	85600212	A	C	0.3698	1.66408e-07	-0.0459048	0.00877115	0.995563	rs62252499	1	CADM2	0	intronic	0.492	6	14
3:85600384:A:G	rs1449407	3	85600384	A	G	0.3708	1.66233e-07	-0.0459066	0.00877117	1	rs62252499	1	CADM2	0	intronic	0.158	7	14
3:85600590:G:T	rs6549036	3	85600590	G	T	0.3708	1.62901e-07	-0.0459402	0.00877132	1	rs62252499	1	CADM2	0	intronic	1.602	6	14
3:85600708:A:G	rs6549037	3	85600708	A	G	0.3708	1.62799e-07	0.0459413	0.00877133	1	rs62252499	1	CADM2	0	intronic	5.746	NA	14
3:85600771:C:G	rs62253970	3	85600771	C	G	0.3708	1.62746e-07	0.0459419	0.00877135	1	rs62252499	1	CADM2	0	intronic	0.24	6	14
3:85600794:A:G	rs62253971	3	85600794	A	G	0.3708	1.62718e-07	-0.0459422	0.00877136	1	rs62252499	1	CADM2	0	intronic	1.467	7	14
3:85600940:C:G	rs1449408	3	85600940	C	G	0.3708	1.62598e-07	0.0459434	0.00877136	1	rs62252499	1	CADM2	0	intronic	0.069	5	14
3:85601440:A:T	rs12492753	3	85601440	A	T	0.3509	3.87726e-07	0.0450843	0.00888363	0.916047	rs62252499	1	CADM2	0	intronic	15.04	6	14
3:85602474:A:C	rs2029131	3	85602474	A	C	0.3708	1.60091e-07	-0.0459693	0.00877149	1	rs62252499	1	CADM2	0	intronic	0.16	6	13
3:85602746:A:C	rs2029132	3	85602746	A	C	0.3708	1.5998e-07	0.0459704	0.0087715	1	rs62252499	1	CADM2	0	intronic	3.632	7	13
3:85602808:A:G	rs2029133	3	85602808	A	G	0.3708	1.60237e-07	0.0459676	0.00877146	1	rs62252499	1	CADM2	0	intronic	1.458	7	13
3:85603219:C:G	rs1449410	3	85603219	C	G	0.3708	1.60115e-07	-0.0459689	0.00877146	1	rs62252499	1	CADM2	0	intronic	1.756	7	9
3:85603262:G:T	rs2029134	3	85603262	G	T	0.3519	3.83062e-07	0.0451054	0.00888375	0.920269	rs62252499	1	CADM2	0	intronic	2.873	7	9
3:85603309:A:G	rs7618494	3	85603309	A	G	0.3519	4.03512e-07	-0.0450341	0.00888705	0.920269	rs62252499	1	CADM2	0	intronic	2.253	6	9
3:85603371:A:G	rs7640828	3	85603371	A	G	0.3519	3.84109e-07	0.0451009	0.00888378	0.920269	rs62252499	1	CADM2	0	intronic	1.367	7	9
3:85603462:C:T	rs7652683	3	85603462	C	T	0.3489	6.88068e-07	0.0441565	0.00889403	0.90879	rs62252499	1	CADM2	0	intronic	2.034	4	9
3:85603643:G:T	rs7652808	3	85603643	G	T	0.3489	6.91297e-07	0.0441488	0.0088941	0.90879	rs62252499	1	CADM2	0	intronic	2.623	6	9
3:85603872:G:T	rs62250463	3	85603872	G	T	0.3708	1.59722e-07	0.0459729	0.00877147	1	rs62252499	1	CADM2	0	intronic	1.937	7	9
3:85604158:A:G	rs1375544	3	85604158	A	G	0.3708	1.59323e-07	-0.0459769	0.00877147	1	rs62252499	1	CADM2	0	intronic	3.957	6	9
3:85604320:G:T	rs1375545	3	85604320	G	T	0.3708	1.54354e-07	-0.0460316	0.00877211	1	rs62252499	1	CADM2	0	intronic	0.507	6	9
3:85604405:A:G	rs1375546	3	85604405	A	G	0.3708	1.54299e-07	0.0460322	0.00877211	1	rs62252499	1	CADM2	0	intronic	5.451	6	9
3:85604765:A:G	rs72615726	3	85604765	A	G	0.3708	1.54155e-07	0.0460336	0.0087721	1	rs62252499	1	CADM2	0	intronic	2.088	6	14
3:85604923:C:T	rs17518584	3	85604923	C	T	0.3718	1.73875e-07	-0.0459433	0.00879216	0.995584	rs62252499	1	CADM2	0	intronic	0.567	6	14
3:85604963:A:T	rs67584463	3	85604963	A	T	0.3529	4.34255e-07	0.0449912	0.00890318	0.915999	rs62252499	1	CADM2	0	intronic	5.534	6	14
3:85605046:A:G	rs66631011	3	85605046	A	G	0.3718	1.73737e-07	0.0459445	0.00879213	0.995584	rs62252499	1	CADM2	0	intronic	1.607	6	14
3:85605061:C:T	rs68049270	3	85605061	C	T	0.3718	1.73767e-07	-0.0459441	0.00879212	0.995584	rs62252499	1	CADM2	0	intronic	3.264	7	14
3:85605180:C:T	rs73133799	3	85605180	C	T	0.3718	2.97773e-07	0.0451083	0.00880165	0.995584	rs62252499	1	CADM2	0	intronic	0.132	6	14
3:85605183:C:T	rs73133800	3	85605183	C	T	0.3718	2.97613e-07	-0.0451091	0.00880164	0.995584	rs62252499	1	CADM2	0	intronic	1.946	6	14
3:85605206:G:T	rs67568006	3	85605206	G	T	0.3718	2.97565e-07	-0.0451094	0.00880164	0.995584	rs62252499	1	CADM2	0	intronic	0.152	7	14
3:85605437:C:T	rs62250465	3	85605437	C	T	0.3708	1.73228e-07	-0.0459491	0.00879211	1	rs62252499	1	CADM2	0	intronic	2.774	7	14
3:85606003:A:G	rs6549039	3	85606003	A	G	0.3708	1.53523e-07	-0.0460402	0.00877209	1	rs62252499	1	CADM2	0	intronic	0.747	5	14
3:85606061:G:T	rs6549040	3	85606061	G	T	0.3708	1.53432e-07	-0.0460411	0.00877208	1	rs62252499	1	CADM2	0	intronic	13.26	7	14
3:85606462:C:G	rs4856274	3	85606462	C	G	0.3519	3.86786e-07	-0.0450953	0.008885	0.920269	rs62252499	1	CADM2	0	intronic	1.6	6	14
3:85606520:A:C	rs4856275	3	85606520	A	C	0.3708	1.65189e-07	0.0462223	0.00882953	1	rs62252499	1	CADM2	0	intronic	5.216	6	14
3:85606521:G:T	rs4856586	3	85606521	G	T	0.3708	1.65189e-07	0.0462223	0.00882953	1	rs62252499	1	CADM2	0	intronic	3.068	6	14
3:85606693:A:T	rs4856276	3	85606693	A	T	0.3708	1.62383e-07	-0.0461355	0.00880762	1	rs62252499	1	CADM2	0	intronic	0.653	6	14
3:85606696:G:T	rs4856587	3	85606696	G	T	0.3708	1.6235e-07	-0.0461358	0.00880762	1	rs62252499	1	CADM2	0	intronic	4.725	6	14
3:85606747:A:G	rs4856277	3	85606747	A	G	0.3708	1.53175e-07	-0.0460438	0.00877207	1	rs62252499	1	CADM2	0	intronic	2.26	6	14
3:85606962:A:C	rs67277278	3	85606962	A	C	0.3708	1.53169e-07	0.0460438	0.00877207	1	rs62252499	1	CADM2	0	intronic	5.349	7	14
3:85607003:C:T	rs4543024	3	85607003	C	T	0.3708	1.532e-07	0.0460434	0.00877206	1	rs62252499	1	CADM2	0	intronic	1.582	NA	14
3:85607010:A:G	rs68028504	3	85607010	A	G	0.3708	1.53151e-07	-0.0460439	0.00877206	1	rs62252499	1	CADM2	0	intronic	0.052	7	14
3:85607142:A:G	rs4441668	3	85607142	A	G	0.3708	1.53547e-07	-0.0460388	0.00877187	1	rs62252499	1	CADM2	0	intronic	3.51	NA	14
3:85607161:C:T	rs1449370	3	85607161	C	T	0.3708	1.53501e-07	-0.0460393	0.00877187	1	rs62252499	1	CADM2	0	intronic	6.152	5	14
3:85607285:A:G	rs66499081	3	85607285	A	G	0.3708	1.58405e-07	-0.045985	0.00877122	1	rs62252499	1	CADM2	0	intronic	4.88	5	14
3:85607323:C:T	rs1449371	3	85607323	C	T	0.3708	1.58293e-07	0.0459861	0.00877122	1	rs62252499	1	CADM2	0	intronic	1.931	5	14
3:85607393:A:G	rs66544515	3	85607393	A	G	0.3708	1.58247e-07	0.0459866	0.00877121	1	rs62252499	1	CADM2	0	intronic	1.067	6	14
3:85607605:G:T	rs7653790	3	85607605	G	T	0.3708	1.58241e-07	-0.0459866	0.00877121	1	rs62252499	1	CADM2	0	intronic	1.121	7	14
3:85608139:A:C	rs724304	3	85608139	A	C	0.3708	1.55132e-07	-0.0460272	0.00877283	1	rs62252499	1	CADM2	0	intronic	8.779	NA	14
3:85608199:G:T	rs1449372	3	85608199	G	T	0.3708	1.54671e-07	0.0460245	0.00877139	1	rs62252499	1	CADM2	0	intronic	8.245	6	14
3:85608461:A:G	rs1449373	3	85608461	A	G	0.3708	1.52299e-07	0.046053	0.00877207	1	rs62252499	1	CADM2	0	intronic	0.966	6	14
3:85608487:C:T	rs1449374	3	85608487	C	T	0.3708	1.51891e-07	-0.0460582	0.00877223	1	rs62252499	1	CADM2	0	intronic	3.967	6	14
3:85608568:G:T	rs1449375	3	85608568	G	T	0.3708	1.51792e-07	-0.0460598	0.00877233	1	rs62252499	1	CADM2	0	intronic	0.165	6	14
3:85609072:C:T	rs2167043	3	85609072	C	T	0.3708	1.51653e-07	0.0460639	0.00877283	1	rs62252499	1	CADM2	0	intronic	4.055	7	7
3:85609095:C:T	rs2167044	3	85609095	C	T	0.3708	1.51453e-07	-0.0460664	0.0087729	1	rs62252499	1	CADM2	0	intronic	5.55	7	7
3:85609289:A:G	rs59073108	3	85609289	A	G	0.3708	1.51516e-07	-0.0460661	0.00877298	1	rs62252499	1	CADM2	0	intronic	10.9	7	7
3:85609303:C:T	rs62250467	3	85609303	C	T	0.3708	1.51429e-07	0.0460674	0.00877304	1	rs62252499	1	CADM2	0	intronic	9.43	5	7
3:85609365:A:G	rs17459563	3	85609365	A	G	0.3708	1.50157e-07	0.0460845	0.0087737	1	rs62252499	1	CADM2	0	intronic	15.68	5	7
3:85609398:C:G	rs72615727	3	85609398	C	G	0.3718	1.49004e-07	0.0461907	0.00879153	0.995554	rs62252499	1	CADM2	0	intronic	13.66	5	7
3:85609412:C:T	rs77852438	3	85609412	C	T	0.3708	1.18479e-07	-0.0466474	0.00880795	1	rs62252499	1	CADM2	0	intronic	17.68	5	2
3:85609413:A:C	rs78288623	3	85609413	A	C	0.3708	1.18368e-07	0.0466494	0.00880803	1	rs62252499	1	CADM2	0	intronic	16.41	5	2
3:85609795:C:T	rs1449378	3	85609795	C	T	0.3708	1.51053e-07	-0.0460961	0.00877774	1	rs62252499	1	CADM2	0	intronic	5.85	3a	2
3:85609879:C:T	rs1449379	3	85609879	C	T	0.3708	1.51204e-07	0.0460949	0.00877782	1	rs62252499	1	CADM2	0	intronic	2.985	3a	5
3:85610083:A:G	rs1530738	3	85610083	A	G	0.3708	1.50975e-07	-0.0460985	0.00877805	1	rs62252499	1	CADM2	0	intronic	0.378	5	5
3:85610114:A:T	rs1530739	3	85610114	A	T	0.3708	1.51081e-07	0.0460978	0.00877813	1	rs62252499	1	CADM2	0	intronic	4.009	7	5
3:85610487:A:G	rs1530740	3	85610487	A	G	0.3708	1.51147e-07	0.0460983	0.00877835	1	rs62252499	1	CADM2	0	intronic	2.574	6	5
3:85610649:C:T	rs17519241	3	85610649	C	T	0.3708	1.49962e-07	-0.0461115	0.00877843	1	rs62252499	1	CADM2	0	intronic	1.034	7	5
3:85610695:C:T	rs62250468	3	85610695	C	T	0.3708	1.49887e-07	-0.0461127	0.00877851	1	rs62252499	1	CADM2	0	intronic	2.568	6	5
3:85610725:A:G	rs17519262	3	85610725	A	G	0.3708	1.49917e-07	-0.0461127	0.00877858	1	rs62252499	1	CADM2	0	intronic	3.846	7	5
3:85610855:A:G	rs60541362	3	85610855	A	G	0.3519	3.93003e-07	-0.0451087	0.00889295	0.920269	rs62252499	1	CADM2	0	intronic	8.379	6	5
3:85610907:G:T	rs78015688	3	85610907	G	T	0.3708	1.13804e-07	0.0467911	0.00882282	1	rs62252499	1	CADM2	0	intronic	0.265	6	5
3:85610976:A:G	rs2167045	3	85610976	A	G	0.3708	1.5e-07	0.0461137	0.00877894	1	rs62252499	1	CADM2	0	intronic	2.588	6	5
3:85611068:A:G	rs2122233	3	85611068	A	G	0.3708	1.50321e-07	0.0461118	0.00877924	1	rs62252499	1	CADM2	0	intronic	1.454	6	5
3:85611139:A:G	rs2122234	3	85611139	A	G	0.3708	1.50638e-07	0.0461094	0.00877941	1	rs62252499	1	CADM2	0	intronic	0.302	6	5
3:85611420:A:G	rs4856588	3	85611420	A	G	0.3708	1.7464e-07	0.04596	0.00879673	1	rs62252499	1	CADM2	0	intronic	2.238	6	5
3:85611560:A:G	rs4856589	3	85611560	A	G	0.3708	1.74771e-07	-0.0459595	0.00879686	1	rs62252499	1	CADM2	0	intronic	0.275	6	5
3:85611791:A:G	rs1900914	3	85611791	A	G	0.3708	1.74751e-07	0.0459605	0.00879701	1	rs62252499	1	CADM2	0	intronic	2.578	7	5
3:85611903:C:T	rs1449380	3	85611903	C	T	0.3708	1.75023e-07	-0.0459594	0.00879728	1	rs62252499	1	CADM2	0	intronic	5.67	6	5
3:85612042:A:G	rs1449381	3	85612042	A	G	0.3708	1.75345e-07	-0.0459572	0.00879743	1	rs62252499	1	CADM2	0	intronic	6.038	6	5
3:85612053:A:G	rs1449382	3	85612053	A	G	0.3708	1.75587e-07	0.0459556	0.00879757	1	rs62252499	1	CADM2	0	intronic	2.223	6	5
3:85612528:A:G	rs4856590	3	85612528	A	G	0.3708	1.73726e-07	0.0459927	0.00880134	1	rs62252499	1	CADM2	0	intronic	2.109	6	5
3:85612550:G:T	rs4856591	3	85612550	G	T	0.3837	2.78129e-07	0.0460656	0.00896597	0.785823	rs62252499	1	CADM2	0	intronic	0.598	6	5
3:85612700:C:T	rs17459906	3	85612700	C	T	0.3708	1.76823e-07	0.0459496	0.00879861	1	rs62252499	1	CADM2	0	intronic	2.726	6	5
3:85612730:A:G	rs4856592	3	85612730	A	G	0.3708	1.77126e-07	0.0459475	0.00879874	1	rs62252499	1	CADM2	0	intronic	0.488	7	5
3:85612748:A:C	rs62250472	3	85612748	A	C	0.3708	1.77173e-07	0.0459482	0.00879896	1	rs62252499	1	CADM2	0	intronic	5.572	6	5
3:85612767:C:T	rs4856593	3	85612767	C	T	0.3708	1.77487e-07	0.045946	0.00879908	1	rs62252499	1	CADM2	0	intronic	0.491	6	5
3:85613378:C:T	rs1375549	3	85613378	C	T	0.3718	1.75216e-07	0.0459811	0.00880179	0.995584	rs62252499	1	CADM2	0	intronic	1.345	6	7
3:85613380:A:G	rs1375550	3	85613380	A	G	0.3718	1.76373e-07	-0.045972	0.00880211	0.995584	rs62252499	1	CADM2	0	intronic	2.944	6	7
3:85613422:C:G	rs1900915	3	85613422	C	G	0.3718	1.79566e-07	0.0459315	0.00879994	0.995584	rs62252499	1	CADM2	0	intronic	0.117	7	14
3:85613473:C:T	rs2326320	3	85613473	C	T	0.3708	1.81738e-07	-0.0459162	0.00880077	1	rs62252499	1	CADM2	0	intronic	10.08	6	14
3:85613501:C:T	rs1375551	3	85613501	C	T	0.3708	1.83022e-07	0.045906	0.00880102	1	rs62252499	1	CADM2	0	intronic	2.346	6	14
3:85613831:A:G	rs1449383	3	85613831	A	G	0.3708	1.82708e-07	-0.0459097	0.00880118	1	rs62252499	1	CADM2	0	intronic	3.132	7	14
3:85613855:A:T	rs1449384	3	85613855	A	T	0.3708	2.23942e-07	0.0456537	0.00881611	1	rs62252499	1	CADM2	0	intronic	3.465	6	14
3:85613991:C:T	rs1449385	3	85613991	C	T	0.3708	2.24357e-07	0.0456517	0.00881631	1	rs62252499	1	CADM2	0	intronic	3.004	7	14
3:85614034:C:T	rs56031423	3	85614034	C	T	0.3519	5.14019e-07	-0.0448476	0.00893188	0.920269	rs62252499	1	CADM2	0	intronic	2.709	6	14
3:85614272:A:G	rs17023019	3	85614272	A	G	0.3519	5.14906e-07	-0.0448469	0.00893234	0.920269	rs62252499	1	CADM2	0	intronic	11.38	6	14
3:85614670:A:T	rs67999244	3	85614670	A	T	0.3708	2.37475e-07	0.0455773	0.00882003	1	rs62252499	1	CADM2	0	intronic	5.265	7	14
3:85614746:A:C	rs62250489	3	85614746	A	C	0.3708	2.37573e-07	0.0455771	0.00882013	1	rs62252499	1	CADM2	0	intronic	4.144	6	14
3:85614934:C:T	rs62250490	3	85614934	C	T	0.3708	2.37973e-07	-0.0455749	0.00882024	1	rs62252499	1	CADM2	0	intronic	3.467	7	14
3:85615183:C:T	rs7617306	3	85615183	C	T	0.3708	2.38444e-07	-0.0455726	0.00882043	1	rs62252499	1	CADM2	0	intronic	3.324	6	14
3:85615298:G:T	rs7629091	3	85615298	G	T	0.3708	2.41351e-07	0.0455561	0.00882111	1	rs62252499	1	CADM2	0	intronic	7.928	5	14
3:85615981:C:G	rs10511081	3	85615981	C	G	0.3708	2.38738e-07	-0.0455962	0.00882539	1	rs62252499	1	CADM2	0	intronic	2.822	7	14
3:85616009:G:T	rs62250491	3	85616009	G	T	0.3708	2.39086e-07	-0.0455942	0.00882548	1	rs62252499	1	CADM2	0	intronic	0.053	7	7
3:85616014:C:T	rs62250492	3	85616014	C	T	0.3708	2.39911e-07	0.0455891	0.00882558	1	rs62252499	1	CADM2	0	intronic	1.681	7	7
3:85616118:A:C	rs17519948	3	85616118	A	C	0.3708	2.5364e-07	-0.0454847	0.00882318	1	rs62252499	1	CADM2	0	intronic	0.816	7	7
3:85616809:C:T	rs1597315	3	85616809	C	T	0.3708	2.33119e-07	-0.0456773	0.00883347	1	rs62252499	1	CADM2	0	intronic	0.118	NA	5
3:85617287:A:T	rs6801823	3	85617287	A	T	0.3708	2.53532e-07	-0.0454975	0.00882552	1	rs62252499	1	CADM2	0	intronic	1.761	6	5
3:85617685:C:T	rs112069021	3	85617685	C	T	0.3708	2.76494e-07	0.0453715	0.00882896	1	rs62252499	1	CADM2	0	intronic	0.383	6	5
3:85617711:A:C	rs73137879	3	85617711	A	C	0.3708	2.73629e-07	0.0453965	0.00883047	1	rs62252499	1	CADM2	0	intronic	3.073	6	5
3:85618112:G:T	rs17460541	3	85618112	G	T	0.3708	2.77132e-07	-0.0453661	0.00882865	1	rs62252499	1	CADM2	0	intronic	1.047	6	5
3:85618308:C:T	rs1375555	3	85618308	C	T	0.3708	2.77617e-07	0.0453636	0.00882873	1	rs62252499	1	CADM2	0	intronic	2.403	NA	5
3:85618419:A:G	rs1375554	3	85618419	A	G	0.3708	2.77961e-07	-0.0453619	0.00882881	1	rs62252499	1	CADM2	0	intronic	3.736	NA	5
3:85619079:G:T	rs1449386	3	85619079	G	T	0.3668	1.26221e-07	0.0467559	0.00884779	0.982391	rs62252499	1	CADM2	0	intronic	2.03	NA	5
3:85619644:C:T	rs59211082	3	85619644	C	T	0.3708	3.02285e-07	0.0452409	0.00883241	1	rs62252499	1	CADM2	0	intronic	3.02	7	5
3:85619783:A:G	rs12639564	3	85619783	A	G	0.3668	1.30649e-07	-0.0466882	0.00884555	0.982391	rs62252499	1	CADM2	0	intronic	6.566	7	5
3:85619857:C:T	rs61316596	3	85619857	C	T	0.3708	3.02339e-07	-0.0452412	0.00883253	1	rs62252499	1	CADM2	0	intronic	1.923	7	5
3:85620481:G:T	rs59417256	3	85620481	G	T	0.3708	3.02121e-07	0.0452427	0.00883259	1	rs62252499	1	CADM2	0	intronic	7.72	7	5
3:85620621:G:T	rs62250496	3	85620621	G	T	0.3708	3.03146e-07	-0.0452374	0.00883266	1	rs62252499	1	CADM2	0	intronic	1.055	6	5
3:85621010:A:G	rs57276248	3	85621010	A	G	0.3708	3.07769e-07	-0.0452155	0.00883331	1	rs62252499	1	CADM2	0	intronic	3.536	5	5
3:85621205:A:G	rs59835020	3	85621205	A	G	0.3708	3.08417e-07	-0.0452124	0.00883338	1	rs62252499	1	CADM2	0	intronic	0.829	4	5
3:85621931:C:T	rs7616458	3	85621931	C	T	0.3708	3.10237e-07	0.0452035	0.00883357	1	rs62252499	1	CADM2	0	intronic	0.343	5	5
3:85622242:A:C	rs17023032	3	85622242	A	C	0.3658	1.65571e-07	0.0463178	0.00884849	0.97808	rs62252499	1	CADM2	0	intronic	0.906	7	5
3:85622663:A:G	rs12494446	3	85622663	A	G	0.3668	1.35988e-07	0.0466328	0.00884738	0.982391	rs62252499	1	CADM2	0	intronic	3.199	6	5
3:85622699:A:T	rs58889493	3	85622699	A	T	0.3708	3.17005e-07	0.0451713	0.00883431	1	rs62252499	1	CADM2	0	intronic	6.347	7	5
3:85623271:C:T	rs17460701	3	85623271	C	T	0.3708	3.18211e-07	-0.0451655	0.00883442	1	rs62252499	1	CADM2	0	intronic	7.246	6	1
3:85624131:A:T	rs6788098	3	85624131	A	T	0.3698	3.34123e-07	-0.0450859	0.0088348	0.995563	rs62252499	1	CADM2	0	intronic	0.882	7	5
3:85624189:A:G	rs6790699	3	85624189	A	G	0.3688	3.49627e-07	-0.0450664	0.00884586	0.991127	rs62252499	1	CADM2	0	intronic	0.108	6	5
3:85624386:G:T	rs4856596	3	85624386	G	T	0.3698	3.29021e-07	-0.0451191	0.00883626	0.995563	rs62252499	1	CADM2	0	intronic	1.183	6	5
3:85624561:C:T	rs6766690	3	85624561	C	T	0.3698	3.38397e-07	-0.0450659	0.00883503	0.995563	rs62252499	1	CADM2	0	intronic	0.985	7	5
3:85624773:C:G	rs12638040	3	85624773	C	G	0.3698	3.38594e-07	-0.0450656	0.00883516	0.995563	rs62252499	1	CADM2	0	intronic	1.135	6	5
3:85625231:A:G	rs67904150	3	85625231	A	G	0.3698	3.41129e-07	-0.0450543	0.0088354	0.995563	rs62252499	1	CADM2	0	intronic	4.46	5	5
3:85625852:G:T	rs7617323	3	85625852	G	T	0.3658	1.46547e-07	-0.0465178	0.00884865	0.97808	rs62252499	1	CADM2	0	intronic	0.19	7	5
3:85626054:C:T	rs7617356	3	85626054	C	T	0.3698	3.45801e-07	-0.0450319	0.00883548	0.995563	rs62252499	1	CADM2	0	intronic	2.788	5	5
3:85627691:C:T	rs62250500	3	85627691	C	T	0.3698	3.54707e-07	-0.0449945	0.00883649	0.995563	rs62252499	1	CADM2	0	intronic	2.389	5	5
3:85628688:A:G	rs6762535	3	85628688	A	G	0.3698	3.60703e-07	0.0449676	0.00883673	0.995563	rs62252499	1	CADM2	0	intronic	16.46	5	5
3:85628865:A:G	rs6762733	3	85628865	A	G	0.3698	3.62761e-07	0.0449587	0.00883687	0.995563	rs62252499	1	CADM2	0	intronic	2.268	6	5
3:85629183:C:G	rs6549041	3	85629183	C	G	0.3698	3.63296e-07	-0.0449542	0.00883647	0.995563	rs62252499	1	CADM2	0	intronic	3.692	6	5
3:85629255:A:G	rs6549042	3	85629255	A	G	0.3698	3.58617e-07	-0.0449811	0.00883748	0.995563	rs62252499	1	CADM2	0	intronic	2.025	6	5
3:85630551:A:C	rs1551042	3	85630551	A	C	0.3509	6.36098e-07	-0.0445978	0.00895544	0.91641	rs62252499	1	CADM2	0	intronic	0.017	NA	5
3:85631142:A:T	rs1972994	3	85631142	A	T	0.3479	9.35474e-07	-0.0440118	0.0089733	0.905027	rs62252499	1	CADM2	0	intronic	0.828	6	5
3:85631316:C:T	rs1972993	3	85631316	C	T	0.487	6.77305e-06	-0.0408898	0.00908558	0.991754	rs62252499	1	CADM2	0	intronic	0.424	NA	5
3:85631845:C:G	rs6772956	3	85631845	C	G	0.3698	3.67941e-07	0.0449358	0.00883703	0.995563	rs62252499	1	CADM2	0	intronic	0.236	7	5
3:85632126:A:T	rs6549043	3	85632126	A	T	0.3698	3.68634e-07	-0.0449331	0.00883712	0.995563	rs62252499	1	CADM2	0	intronic	2.014	6	5
3:85632432:A:G	rs6549044	3	85632432	A	G	0.3698	3.69707e-07	-0.0449284	0.00883716	0.995563	rs62252499	1	CADM2	0	intronic	8.948	6	5
3:85634216:C:G	rs62250501	3	85634216	C	G	0.3658	1.60005e-07	-0.0463853	0.0088507	0.97808	rs62252499	1	CADM2	0	intronic	0.633	4	2
3:85634325:A:G	rs62250502	3	85634325	A	G	0.3708	9.17572e-07	-0.0438139	0.00892604	0.991107	rs62252499	1	CADM2	0	intronic	0.53	4	2
3:85634410:A:T	rs62250503	3	85634410	A	T	0.3688	3.94817e-07	0.0448292	0.00883937	0.991166	rs62252499	1	CADM2	0	intronic	1.535	5	5
3:85635126:G:T	rs1375557	3	85635126	G	T	0.3698	3.96535e-07	-0.0448228	0.00883956	0.995563	rs62252499	1	CADM2	0	intronic	3.623	5	5
3:85635190:A:G	rs1375558	3	85635190	A	G	0.3698	3.97305e-07	-0.04482	0.00883964	0.995563	rs62252499	1	CADM2	0	intronic	1.268	7	5
3:85636421:A:G	rs7634761	3	85636421	A	G	0.3688	4.14144e-07	0.0447657	0.00884272	0.991166	rs62252499	1	CADM2	0	intronic	2.132	7	5
3:85636628:A:G	rs4508796	3	85636628	A	G	0.3698	4.01387e-07	-0.0448041	0.00883991	0.995563	rs62252499	1	CADM2	0	intronic	1.12	NA	5
3:85638325:C:G	rs62250537	3	85638325	C	G	0.3509	6.51363e-07	-0.0446244	0.00896907	0.91641	rs62252499	1	CADM2	0	intronic	1.119	5	5
3:85639548:A:T	rs6794866	3	85639548	A	T	0.3698	4.03845e-07	0.0448003	0.00884119	0.995563	rs62252499	1	CADM2	0	intronic	13.43	6	5
3:85639672:A:G	rs6782190	3	85639672	A	G	0.3509	6.83649e-07	0.0444968	0.00896031	0.91641	rs62252499	1	CADM2	0	intronic	6.061	6	5
3:85640136:C:G	rs67955391	3	85640136	C	G	0.3698	4.04046e-07	-0.0448028	0.00884185	0.995563	rs62252499	1	CADM2	0	intronic	0.388	7	5
3:85640418:A:G	rs68001049	3	85640418	A	G	0.3698	4.04382e-07	-0.044803	0.00884216	0.995563	rs62252499	1	CADM2	0	intronic	12.53	7	5
3:85641825:G:T	rs11919099	3	85641825	G	T	0.3698	4.14531e-07	-0.0447784	0.00884555	0.995563	rs62252499	1	CADM2	0	intronic	1.426	7	5
3:85642479:A:G	rs1375566	3	85642479	A	G	0.3658	1.78783e-07	0.0462539	0.00886033	0.97808	rs62252499	1	CADM2	0	intronic	2.311	NA	5
3:85642881:A:G	rs1375565	3	85642881	A	G	0.3698	4.15537e-07	-0.0447846	0.00884757	0.995563	rs62252499	1	CADM2	0	intronic	3.552	NA	5
3:85644047:A:T	rs2029130	3	85644047	A	T	0.3698	4.26498e-07	0.0447509	0.00884961	0.995563	rs62252499	1	CADM2	0	intronic	21.1	5	2
3:85644366:C:G	rs10865611	3	85644366	C	G	0.3509	7.13854e-07	0.0444628	0.00896863	0.91641	rs62252499	1	CADM2	0	intronic	0.338	7	5
3:85644911:C:T	rs12054328	3	85644911	C	T	0.3509	7.0674e-07	0.0444946	0.00897154	0.91641	rs62252499	1	CADM2	0	intronic	0.864	6	5
3:85645057:C:T	rs62250540	3	85645057	C	T	0.3698	4.23666e-07	-0.044785	0.00885413	0.995563	rs62252499	1	CADM2	0	intronic	2.739	6	5
3:85645873:C:T	rs2044725	3	85645873	C	T	0.3479	9.21391e-07	-0.0440847	0.00898271	0.905027	rs62252499	1	CADM2	0	intronic	1.548	NA	5
3:85646002:A:G	rs2044723	3	85646002	A	G	0.3509	7.0416e-07	-0.0445155	0.00897446	0.91641	rs62252499	1	CADM2	0	intronic	1.103	NA	5
3:85646426:G:T	rs1900916	3	85646426	G	T	0.3509	7.06219e-07	0.0445198	0.00897636	0.91641	rs62252499	1	CADM2	0	intronic	2.038	NA	5
3:85646525:A:T	rs1947221	3	85646525	A	T	0.3698	4.27627e-07	0.0447959	0.0088594	0.995563	rs62252499	1	CADM2	0	intronic	7.013	7	5
3:85646828:A:G	rs1449402	3	85646828	A	G	0.3509	7.06954e-07	0.0445243	0.00897762	0.91641	rs62252499	1	CADM2	0	intronic	4.248	NA	5
3:85646850:C:T	rs1449401	3	85646850	C	T	0.3509	7.06098e-07	-0.0445279	0.00897791	0.91641	rs62252499	1	CADM2	0	intronic	0.748	NA	5
3:85647614:G:T	rs62263910	3	85647614	G	T	0.3698	4.35946e-07	-0.0447823	0.00886316	0.995563	rs62252499	1	CADM2	0	intronic	1.546	6	5
3:85648246:A:G	rs62263912	3	85648246	A	G	0.3698	3.74826e-07	0.0450926	0.00887401	0.995563	rs62252499	1	CADM2	0	intronic	1.86	6	5
3:85649198:G:T	rs956281	3	85649198	G	T	0.3698	4.41997e-07	0.0447876	0.00886882	0.995563	rs62252499	1	CADM2	0	intronic	10.47	7	5
3:85650341:C:T	rs112523595	3	85650341	C	T	0.3698	4.19731e-07	0.0449259	0.00887885	0.9867	rs62252499	1	CADM2	0	intronic	2.039	6	5
3:85650356:C:G	rs72615728	3	85650356	C	G	0.3698	4.21274e-07	-0.0449172	0.00887836	0.9867	rs62252499	1	CADM2	0	intronic	0.587	7	5
3:85650790:A:C	rs4856598	3	85650790	A	C	0.3648	1.80351e-07	-0.0464018	0.00889143	0.973694	rs62252499	1	CADM2	0	intronic	0.11	6	5
3:85651136:A:G	rs34495106	3	85651136	A	G	0.3688	4.2193e-07	-0.044919	0.00887925	0.991127	rs62252499	1	CADM2	0	intronic	19.5	5	5
3:85653460:A:G	rs10511073	3	85653460	A	G	0.3509	3.18093e-05	-0.0369401	0.00888026	0.688683	rs62252499	1	CADM2	0	intronic	2.864	NA	5
3:85656311:C:T	rs1375564	3	85656311	C	T	0.3608	1.68315e-05	-0.0379487	0.00881916	0.715895	rs62252499	1	CADM2	0	intronic	0.72	NA	9
3:85657658:A:C	rs4856600	3	85657658	A	C	0.3499	2.76539e-05	-0.0371484	0.00886242	0.685593	rs62252499	1	CADM2	0	intronic	10.41	5	14
3:85658601:C:G	rs12637027	3	85658601	C	G	0.3598	1.68746e-05	-0.0378963	0.00880813	0.712594	rs62252499	1	CADM2	0	intronic	4.806	6	14
3:85659025:A:G	rs7632056	3	85659025	A	G	0.3608	1.72853e-05	-0.0378449	0.00880711	0.715895	rs62252499	1	CADM2	0	intronic	0.985	6	14
3:85659379:A:T	rs1449400	3	85659379	A	T	0.3608	1.72936e-05	0.0378431	0.00880691	0.715895	rs62252499	1	CADM2	0	intronic	5.681	7	14
3:85663097:C:T	rs62263915	3	85663097	C	T	0.3608	1.56899e-05	-0.0380255	0.00880521	0.715895	rs62252499	1	CADM2	0	intronic	0.374	6	14
3:85663539:C:G	rs6549045	3	85663539	C	G	0.3588	1.55656e-05	-0.0380469	0.00880658	0.708083	rs62252499	1	CADM2	0	intronic	0.44	6	14
3:85663849:A:G	rs6779752	3	85663849	A	G	0.3598	1.52548e-05	0.0380849	0.00880633	0.712594	rs62252499	1	CADM2	0	intronic	2.147	6	14
3:85665501:C:T	rs6799195	3	85665501	C	T	0.3509	2.44796e-05	0.0373782	0.00885894	0.688683	rs62252499	1	CADM2	0	intronic	3.62	6	14
3:85667846:G:T	rs62263916	3	85667846	G	T	0.3598	1.4481e-05	-0.0381996	0.00880948	0.712594	rs62252499	1	CADM2	0	intronic	0.076	6	9
3:85667928:A:G	rs62263917	3	85667928	A	G	0.3499	2.40115e-05	-0.0374291	0.00886188	0.685593	rs62252499	1	CADM2	0	intronic	0.718	7	9
3:85667938:A:G	rs62263918	3	85667938	A	G	0.3608	1.49785e-05	-0.038126	0.00880762	0.715895	rs62252499	1	CADM2	0	intronic	1.116	7	9
3:85668052:A:G	rs67391933	3	85668052	A	G	0.3499	2.38669e-05	-0.0374418	0.00886203	0.685593	rs62252499	1	CADM2	0	intronic	0.39	7	9
3:85668239:A:G	rs17521052	3	85668239	A	G	0.3608	1.48745e-05	-0.0381405	0.00880785	0.715895	rs62252499	1	CADM2	0	intronic	4.392	7	9
3:85668570:A:G	rs11923343	3	85668570	A	G	0.3598	1.44727e-05	-0.0381983	0.00880893	0.712594	rs62252499	1	CADM2	0	intronic	3.086	6	9
3:85669226:A:G	rs9816536	3	85669226	A	G	0.3509	2.39816e-05	-0.0374289	0.00886124	0.688683	rs62252499	1	CADM2	0	intronic	1.887	7	9
3:85669683:A:G	rs7627780	3	85669683	A	G	0.3509	2.39398e-05	-0.0374335	0.00886151	0.688683	rs62252499	1	CADM2	0	intronic	1.323	6	14
3:85669779:G:T	rs6549046	3	85669779	G	T	0.3608	1.40509e-05	-0.0382518	0.00880806	0.715895	rs62252499	1	CADM2	0	intronic	5.688	7	14
3:85671119:C:T	rs9826759	3	85671119	C	T	0.3509	2.27956e-05	0.0375303	0.0088613	0.688683	rs62252499	1	CADM2	0	intronic	4.699	7	14
3:85671909:C:T	rs9831610	3	85671909	C	T	0.3509	2.35615e-05	0.0374693	0.00886245	0.688683	rs62252499	1	CADM2	0	intronic	1.69	6	7

## Sheet: F1.25.Genes.MAGMA.SS
Figure 1-25. Results of gene-based association analyses for the GWAS of UPPSP Sensation Seeking (Bonferroni results, P = 0.05/18909 = 2.64 x 2.64e-6, are highlighted in bold)
GENE	CHR	START	STOP	NSNPS	NPARAM	ZSTAT	P
CADM2	3	84998132	86133579	4472	94	5.9073	1.7392e-09
SAP30L	5	153815517	153850614	104	37	4.6853	1.3975e-06
SFXN2	10	104464295	104513249	158	32	4.5789	2.3369e-06
SMCO4	11	93201638	93286674	347	40	4.529	2.9632e-06
LLGL2	17	73511161	73581289	428	41	4.2762	9.5068e-06
PRR22	19	5772971	5794776	117	19	3.8858	5.0992e-05
DHRS7	14	60600838	60646574	173	15	3.8257	6.5202e-05
TGM1	14	24708320	24743638	89	26	3.7893	7.555e-05
PPP6R2	22	50771733	50893514	519	38	3.7823	7.7695e-05
TSEN54	17	73502141	73530820	131	18	3.7801	7.8398e-05
GIPC2	1	78435226	78614133	594	49	3.7692	8.1891e-05
APOBEC3G	22	39426924	39493748	224	32	3.7653	8.3169e-05
DUS3L	19	5774843	5801249	140	21	3.7503	8.8318e-05
SCAND3	6	28529407	28593989	236	45	3.7457	8.9929e-05
CD34	1	208047594	208094747	208	40	3.7147	0.00010171
GOLGA8J	15	30365158	30395702	13	2	3.6218	0.0001463
APOBEC3C	22	39400088	39426357	93	21	3.6121	0.00015185
BTBD16	10	124020821	124107677	454	45	3.5748	0.00017526
POLD1	19	50877461	50931273	208	35	3.5609	0.00018482
PCNXL4	14	60548629	60645851	322	16	3.5599	0.00018553
RNF222	17	8284022	8311144	82	24	3.5498	0.00019274
NEURL4	17	7208947	7242712	83	18	3.5497	0.00019282
SYT9	11	7250009	7500273	1244	117	3.5341	0.00020462
ZNF701	19	53049075	53100427	270	34	3.5235	0.00021293
APOBEC3D	22	39400368	39439281	120	22	3.5043	0.00022889
TMED7	5	114939205	114978689	147	23	3.5012	0.00023156
RABGGTA	14	24724744	24750945	69	20	3.4946	0.00023741
ADM2	22	50909985	50934869	114	40	3.4843	0.00024675
KRBA2	17	8261955	8290029	70	15	3.4571	0.00027297
COL6A6	3	130269178	130406999	347	47	3.4554	0.00027476
RPL26	17	8270838	8296531	81	16	3.4351	0.00029612
SBF1	22	50873429	50923454	249	54	3.4243	0.00030824
HAND1	5	153844532	153867824	82	29	3.4216	0.00031129
NPPC	2	232776530	232801113	79	29	3.4137	0.00032041
DIRC1	2	189588882	189664831	346	24	3.3782	0.00036482
TMED7-TICAM2	5	114904339	114971858	222	37	3.3744	0.00036987
TICAM2	5	114904339	114971876	222	37	3.3744	0.00036987
SLFN12	17	33728079	33770302	178	33	3.3279	0.00043748
WIF1	12	65434406	65525346	250	41	3.3239	0.00044386
SFSWAP	12	132185626	132294282	351	35	3.3212	0.0004481
CASKIN2	17	73486342	73521664	139	21	3.3122	0.00046289
RHOBTB3	5	95039226	95170087	433	70	3.2784	0.00052202
GATS	7	99788283	99879855	222	31	3.2721	0.00053381
ZNF22	10	45485923	45510774	103	23	3.2548	0.00056745
ANXA11	10	81900645	81975328	332	30	3.2148	0.00065274
LRFN2	6	40349325	40565204	1088	74	3.2127	0.00065755
WBP1L	10	104493727	104586021	340	37	3.2113	0.00066075
MYH14	19	50681443	50823802	675	81	3.2038	0.00067804
LMO1	11	8235851	8300263	330	52	3.2027	0.00068066
THRB	3	24148651	24546773	1743	176	3.1881	0.0007161
GRIA1	5	152859175	153203429	1493	89	3.1822	0.00073072
AZGP1	7	99554343	99583780	86	20	3.1758	0.00074708
AMPD3	11	10319860	10539126	1019	99	3.1623	0.00078265
WIPF3	7	29836102	29966682	598	62	3.1618	0.00078397
ADAMTSL5	19	1495017	1523603	76	14	3.1576	0.00079527
SLC18A1	8	19992366	20050717	292	38	3.1528	0.00080855
ACAP1	17	7229848	7264797	76	25	3.1528	0.00080859
ADCY6	12	49149975	49192820	90	15	3.1461	0.00082739
ZNF469	16	88483879	88517165	97	23	3.1435	0.00083471
MIOX	22	50915213	50939077	106	42	3.1221	0.00089786
SLC25A48	5	135160338	135234326	350	41	3.1149	0.00091994
NGB	14	77721826	77747655	106	28	3.1085	0.00094029
LYRM4	6	5092827	5271172	971	63	3.1053	0.0009505
PPP2R2D	10	133737955	133783331	148	16	3.1052	0.00095079
A4GNT	3	137832560	137861229	77	16	3.1031	0.00095768
PLA2G4A	1	186788085	186968113	664	65	3.0927	0.00099186
GABRA2	4	46240444	46487247	804	49	3.0921	0.00099362
DRAM2	1	111649955	111692838	152	27	3.0805	0.0010333
PVRIG	7	99805864	99829113	95	13	3.0693	0.0010729
APOBEC3H	22	39483229	39510072	179	18	3.0676	0.0010788
GID4	17	17932606	17981718	121	14	3.0631	0.0010954
OR52B1P	11	6163006	6183818	83	18	3.0605	0.0011049
CATSPERD	19	5710688	5788745	275	55	3.0449	0.0011638
EIF5A	17	7200318	7225774	83	15	3.0418	0.0011757
GPS2	17	7204643	7228883	69	15	3.0417	0.0011763
NEO1	15	73334051	73607547	932	40	3.0372	0.001194
NUDT6	4	123799852	123854123	302	32	3.0238	0.0012482
CORO2A	9	100873257	100964922	420	71	3.0219	0.0012558
XKR6	8	10743555	11068875	1464	53	3.0197	0.0012652
BCAR3	1	94017347	94322706	1193	47	3.0183	0.0012709
DBR1	3	137869854	137903791	113	11	3.0149	0.0012852
CSAD	12	53541447	53585135	89	13	3.0115	0.0012998
ISOC2	19	55954352	55983710	115	33	2.9985	0.0013567
C9orf92	9	16193933	16286311	498	87	2.9828	0.0014281
SBF2	11	9790214	10325754	2338	57	2.9712	0.0014833
ADD3	10	111746126	111905323	587	32	2.9655	0.0015108
BNIP3	10	133771578	133805435	135	11	2.9646	0.0015155
STAG3	7	99765186	99829111	188	20	2.9574	0.001551
PGPEP1L	15	99501459	99561024	238	42	2.9496	0.0015911
FAM83H	8	144796103	144825971	104	17	2.9442	0.001619
SPATA9	5	94977885	95044415	240	35	2.9425	0.0016279
KLHDC10	7	129700350	129785560	337	38	2.9314	0.0016874
C7orf31	7	25164316	25229975	366	30	2.9279	0.0017063
GBP5	1	89714633	89748544	76	20	2.9232	0.0017325
GPR52	1	174407212	174428683	56	13	2.9197	0.001752
TET1	10	70310413	70464239	586	28	2.9196	0.0017524
ADAMTS16	5	5130443	5330417	1100	121	2.914	0.0017841
FAM208B	10	5716801	5815703	415	46	2.9072	0.0018232
CLDN19	1	43188764	43215925	76	18	2.9034	0.0018456
ZNF83	19	53087313	53203749	717	53	2.8978	0.0018789
FGF14	13	102362134	103064124	2654	182	2.8962	0.0018888
PILRA	7	99955153	100007719	111	19	2.8933	0.0019061
SPDYE3	7	99895325	99929819	39	9	2.8885	0.0019357
GRIK4	11	120372468	120869613	1836	187	2.8844	0.0019605
TOP1	20	39647458	39763127	257	39	2.8729	0.0020335
PILRB	7	99923737	99975356	108	11	2.8718	0.0020405
MAPK15	8	144788429	144814628	86	19	2.8589	0.0021254
CEBPD	8	48639471	48661648	29	14	2.856	0.0021453
MPPED1	22	43797202	43913728	588	71	2.8506	0.0021821
DEGS1	1	224353458	224391143	151	27	2.8465	0.0022103
SLC25A19	17	73259073	73295591	135	17	2.8444	0.0022249
SOGA3	6	127749551	127850146	316	34	2.8424	0.0022387
RABGAP1L	1	174118548	174974445	2556	37	2.8381	0.0022694
ZNF436	1	23675941	23705935	90	16	2.838	0.0022696
EFCAB2	1	245123007	245300466	736	49	2.8362	0.002283
MS4A3	11	59814060	59848601	136	20	2.8321	0.0023124
ADM	11	10316227	10338944	65	12	2.8302	0.0023258
ZBTB16	11	113920315	114131398	817	115	2.8285	0.0023386
PRRX1	1	170621869	170718560	273	41	2.8206	0.0023966
FAM117B	2	203489901	203644480	333	54	2.814	0.0024463
FAM199X	X	103401301	103450583	69	18	2.8114	0.0024664
TET3	2	74219840	74345303	334	29	2.8093	0.0024823
FAM175B	10	126480354	126535239	129	24	2.8074	0.002497
RRAD	16	66945582	66969547	68	23	2.807	0.0025006
SLFN13	17	33752115	33785856	143	34	2.805	0.0025156
PIK3R4	3	130387779	130475673	274	15	2.8046	0.0025191
PDLIM2	8	22425792	22465538	159	34	2.8034	0.0025286
ATPAF2	17	17870723	17952523	207	21	2.7999	0.0025561
DTWD1	15	49903177	49947333	148	15	2.7955	0.0025909
ENOX2	X	129747350	130047208	175	42	2.7941	0.002602
AP1S3	2	224606403	224712744	490	45	2.7923	0.0026171
AVL9	7	32525038	33088516	2127	53	2.791	0.0026269
SOGA3	6	127749551	127850500	317	33	2.7869	0.0026605
C16orf97	16	52029399	52122386	362	62	2.7799	0.0027192
BCL2	18	60780579	60997361	657	115	2.776	0.0027513
SEC23A	14	39491123	39588850	296	27	2.7669	0.0028294
RCAN2	6	46178475	46469709	766	53	2.7646	0.00285
DCAF5	14	69507598	69629867	273	31	2.7572	0.002915
GADD45G	9	92209928	92231470	104	22	2.7539	0.0029443
LEPRE1	1	43202006	43242755	123	30	2.7527	0.0029551
HAS3	16	69129467	69162622	76	26	2.7523	0.0029593
LRRC48	17	17866127	17930203	169	22	2.7421	0.0030522
GAREM	18	29694840	30060447	1329	79	2.7384	0.0030872
SLC22A10	11	62895339	63147190	1053	32	2.7369	0.0031006
HCN4	15	73602200	73671605	282	44	2.7272	0.0031937
FXR1	3	180575929	180710541	418	33	2.7158	0.0033054
CRNKL1	20	20005012	20046690	188	27	2.709	0.0033748
STRA13	17	79966578	79991983	55	15	2.7064	0.0034012
ZHX3	20	39797088	39956312	421	39	2.702	0.0034463
FAM160B1	10	116571503	116669591	389	30	2.6888	0.0035858
PLIN4	19	4492204	4527716	112	25	2.665	0.0038493
SLC25A53	X	103333898	103411708	86	22	2.6637	0.0038645
KLF11	2	10172976	10204963	117	24	2.6618	0.0038862
ASTN2	9	119177504	120187348	4472	225	2.6395	0.0041512
CBX6	22	39247455	39278319	92	19	2.6371	0.0041812
REV3L	6	111610234	111814918	554	36	2.631	0.0042563
VDR	12	48225320	48346831	528	70	2.6239	0.0043461
ANXA2	15	60629333	60705082	245	45	2.6203	0.0043923
MMP17	12	132302938	132346328	225	48	2.6199	0.0043984
TBR1	2	162262605	162292381	74	25	2.619	0.0044097
GPR20	8	142356600	142387367	116	28	2.6161	0.0044472
RAPGEF4	2	173590002	173927621	1179	105	2.6141	0.0044733
RHOF	12	122205664	122251309	155	24	2.6133	0.0044833
KRT72	12	52969373	53005322	188	26	2.6132	0.0044848
PRAF2	X	48918813	48941730	13	8	2.611	0.0045139
ZNF740	12	53564484	53594596	74	12	2.6107	0.0045184
GLRX3	10	131924663	131992785	355	28	2.6096	0.0045322
ZFP36	19	39887453	39910052	53	13	2.6055	0.0045866
TRIM32	9	119439581	119473579	105	21	2.6031	0.0046198
C1orf213	1	23685490	23708332	64	12	2.601	0.0046475
EMR3	19	14719929	14810839	389	44	2.5977	0.0046921
FOXI1	5	169522901	169546727	142	25	2.5861	0.0048528
C17orf64	17	58459790	58518782	152	21	2.5827	0.0049011
LMCD1	3	8533393	8619805	444	46	2.5786	0.00496
KBTBD2	7	32897784	32943743	113	16	2.5782	0.0049661
LCE5A	1	152473320	152494653	97	16	2.5728	0.0050434
GIPR	19	46161502	46196982	147	23	2.5686	0.0051049
PCDH7	4	30712037	31158422	1681	86	2.5637	0.0051775
SLC22A25	11	62921248	63007124	366	21	2.5632	0.0051856
ATL2	2	38512022	38614427	552	28	2.5576	0.0052691
ESD	13	47335391	47381367	145	25	2.5576	0.0052692
DNAJC19	3	180691497	180717562	58	16	2.5536	0.005331
USP32	17	58246455	58509831	423	25	2.5494	0.0053956
LRRC9	14	60376431	60540277	537	21	2.5485	0.00541
TMEM196	7	19748933	19823221	383	26	2.5477	0.0054226
PCED1B	12	47463386	47640443	784	79	2.5473	0.0054274
POU3F2	6	99272580	99296660	78	17	2.5469	0.0054339
ARHGEF38	4	106463777	106639250	600	56	2.5421	0.005509
NVL	1	224405036	224528089	389	45	2.5414	0.0055197
GEMIN6	2	38968676	39022142	149	24	2.5339	0.0056397
C15orf59	15	74022141	74055088	129	28	2.5322	0.0056671
HIST1H2AG	6	27090832	27113070	96	19	2.5305	0.0056952
LARS	5	145482601	145572223	361	9	2.5297	0.0057083
TMEM59L	19	18708240	18741849	128	23	2.5291	0.0057178
KCTD8	4	44165926	44460824	997	75	2.5285	0.005727
ZRANB1	10	126620692	126686758	182	25	2.5276	0.0057424
PLCZ1	12	18826103	18900991	339	39	2.5255	0.0057768
PRRG3	X	150853596	150884396	85	27	2.525	0.0057851
IFIT3	10	91077651	91110728	213	22	2.5248	0.0057879
TOR3A	1	179040512	179077158	141	31	2.5225	0.0058266
DEPDC5	22	32139944	32313012	658	35	2.5212	0.0058482
CREB1	2	208384461	208478155	235	36	2.5189	0.0058853
TMEM248	7	66376212	66433538	179	22	2.5183	0.0058968
HDGFRP2	19	4462284	4512223	246	30	2.5182	0.0058974
TMPRSS13	11	117761358	117810174	268	42	2.5163	0.0059301
LCE3E	1	152528130	152549248	70	15	2.5153	0.0059461
TMEM170B	6	11527938	11593757	246	29	2.5148	0.0059549
RBPJ	4	26155077	26446541	782	70	2.5142	0.0059644
TBC1D2	9	100951311	101027915	405	40	2.5134	0.0059779
CAPG	2	85611871	85655555	187	29	2.5084	0.0060632
B4GALT7	5	177017101	177047348	103	18	2.5079	0.0060727
TRPC6	11	101312295	101753293	2304	71	2.5067	0.0060927
SDCBP	8	59455483	59505419	181	21	2.5064	0.006099
KRTAP4-12	17	39269343	39290419	137	9	2.4923	0.0063457
INSL5	1	67253424	67276939	85	19	2.4878	0.0064261
TRAF3IP2	6	111867657	111937481	272	35	2.4876	0.0064302
FBXO48	2	68676551	68704390	62	9	2.4828	0.0065172
CYB5R4	6	84559362	84687143	375	29	2.4827	0.0065195
PCNT	21	47734036	47875682	717	41	2.481	0.0065502
ZFYVE1	14	73426159	73503920	396	31	2.4805	0.0065593
SOAT2	12	53487302	53528322	153	19	2.4792	0.0065831
ZNF681	19	23911997	23951693	113	23	2.478	0.0066068
VOPP1	7	55493749	55650681	825	19	2.4757	0.0066491
REEP2	5	137764706	137792658	90	21	2.4752	0.0066572
LTB4R2	14	24768161	24791252	67	17	2.4742	0.0066773
PTPRR	12	71021853	71324623	1250	128	2.4728	0.0067021
C14orf39	14	60853187	60992261	351	18	2.4725	0.0067079
ARL3	10	104423488	104484164	185	32	2.4721	0.0067159
ATP10B	5	159980127	160289221	1215	99	2.472	0.0067177
C10orf25	10	45483146	45506336	87	26	2.4703	0.0067503
APOBEC3B	22	39368352	39398809	82	13	2.47	0.0067547
WDR66	12	122345768	122451833	326	27	2.4672	0.0068081
CCDC6	10	61538521	61676414	629	38	2.4666	0.0068193
C21orf58	21	47710095	47753789	216	29	2.4664	0.0068237
PLAC8L1	5	145453949	145493932	113	7	2.4656	0.0068398
TPSD1	16	1296060	1318532	85	16	2.4637	0.0068751
SMEK1	14	91913955	91986898	242	26	2.4624	0.0068999
DNAH1	3	52340335	52444507	265	23	2.4598	0.0069508
RAB44	6	36673256	36709870	207	40	2.4532	0.007079
C15orf56	15	40532865	40555170	72	20	2.4526	0.0070908
ELMOD3	2	85571517	85628875	182	30	2.4478	0.0071866
TWISTNB	7	19725085	19758710	147	20	2.4437	0.0072687
C20orf96	20	241504	281390	199	33	2.4426	0.00729
SLC25A1	22	19153095	19176343	114	20	2.4411	0.0073215
S100B	21	48008875	48035121	187	24	2.4402	0.0073399
CTNNA1	5	137936656	138280723	1071	62	2.4372	0.0074011
CXorf66	X	139027884	139057679	37	3	2.4342	0.007463
HIST1H2BJ	6	27083676	27110541	111	23	2.4324	0.0075001
PLCG1	20	39755600	39821629	151	37	2.4316	0.0075158
TLR5	1	223272748	223326624	238	21	2.4298	0.0075535
RIPPLY2	6	84552985	84577234	72	8	2.4298	0.0075537
CRCT1	1	152476978	152498486	97	14	2.4293	0.0075639
ATP8A2	13	25936209	26609989	2634	148	2.4271	0.0076096
RBPMS2	15	65022091	65077786	181	25	2.4256	0.0076415
APOBEC3F	22	39426609	39459915	88	10	2.4253	0.0076484
DNTTIP2	1	94323373	94355474	151	21	2.4251	0.0076524
KRTAP4-11	17	39263433	39284606	162	7	2.4232	0.0076918
FBXO28	1	224291789	224359749	320	23	2.4225	0.007707
C4B	6	31972539	32013195	69	29	2.4224	0.0077093
GRHL2	8	102494660	102691954	821	72	2.4163	0.0078394
SSX2IP	1	85099390	85166486	229	34	2.4143	0.0078825
ALPK3	15	85349911	85426713	305	48	2.4098	0.0079816
CH25H	10	90955694	90977071	84	20	2.4079	0.0080216
POLA1	X	24702036	25025103	326	34	2.4067	0.0080483
SRPX	X	37998589	38090696	164	32	2.4063	0.0080569
FEM1C	5	114846608	114890591	122	30	2.4057	0.0080716
HEPHL1	11	93744527	93856917	436	42	2.4041	0.008107
CSTA	3	122034091	122070819	148	28	2.3999	0.0081988
SSU72	1	1467053	1520249	120	12	2.3994	0.008211
CMIP	16	81468775	81755367	1416	146	2.3993	0.0082134
ADAR	1	154544538	154610475	170	22	2.398	0.0082429
C19orf81	19	51142702	51172567	96	26	2.397	0.0082647
CIDEB	14	24764302	24790636	77	19	2.3964	0.0082794
LSM5	7	32514951	32544895	137	19	2.3961	0.0082845
CHMP3	2	86720554	86958245	572	40	2.3954	0.0083022
EBF3	10	131623547	131772105	330	81	2.3915	0.0083888
MPRIP	17	16935859	17130993	776	37	2.391	0.0084002
COL16A1	1	32107848	32179920	203	41	2.3884	0.0084605
EMR2	19	14833205	14899353	402	43	2.3884	0.0084619
TRIM49D1	11	89634279	89664935	9	1	2.3871	0.0084904
SLCO1C1	12	20838289	20916320	340	37	2.3869	0.008496
MOGAT1	2	223526505	223584649	237	45	2.3846	0.0085484
FBLN7	2	112885962	112955791	241	48	2.3824	0.0086002
BRSK2	11	1401129	1493919	473	47	2.382	0.0086089
LIPA	10	90963326	91184314	1022	78	2.3809	0.0086351
TCERG1	5	145816874	145901524	233	21	2.3806	0.0086412
PIWIL4	11	94267006	94364587	432	47	2.3804	0.0086461
RECQL4	8	145726667	145753229	60	11	2.3801	0.0086544
SORCS3	10	106390859	107034993	2840	85	2.3796	0.0086649
ANKK1	11	113248513	113281140	136	26	2.3788	0.0086847
RSL24D1	15	55463004	55499265	198	18	2.3769	0.00873
CDC23	5	137513339	137559032	131	28	2.3764	0.0087411
ANAPC5	12	121736048	121847699	340	41	2.3724	0.0088366
SLC19A3	2	228539926	228592728	277	29	2.3713	0.0088637
NMBR	6	142369467	142419936	166	21	2.3689	0.0089201
LTB4R2	14	24764940	24791259	79	19	2.3639	0.0090414
GDI2	10	5797186	5894095	410	50	2.3622	0.0090829
KRTAP4-9	17	39251584	39272740	184	9	2.3621	0.0090865
C17orf99	17	76132434	76172258	215	46	2.3566	0.009221
IDO2	8	39782133	39883910	579	45	2.3564	0.0092272
FAM53C	5	137657624	137695416	125	28	2.3514	0.0093507
SPATA22	17	3333313	3427146	387	43	2.3498	0.0093907
GPC2	7	99757229	99784995	74	22	2.3478	0.0094411
ITGB7	12	53575102	53611091	82	19	2.3477	0.0094456
TRIP4	15	64669947	64757502	208	32	2.3477	0.0094458
MEP1B	18	29755032	29810367	223	37	2.3424	0.0095789
C4A	6	31939801	31980458	73	27	2.3408	0.0096203
SLC35G2	3	136527489	136584734	183	14	2.3399	0.0096453
NCK1	3	136571050	136678665	304	17	2.3376	0.0097033
STK19	6	31928868	31960598	95	31	2.3351	0.0097681
TBX10	11	67388774	67417031	126	23	2.3348	0.009778
WSB1	17	25611102	25650657	112	23	2.3324	0.0098398
RETNLB	3	108452271	108486231	141	23	2.3282	0.0099509
TRPV5	7	142595267	142640905	149	17	2.3279	0.0099591
PLAC9	10	81881438	81915115	212	35	2.3271	0.0099809
NOP9	14	24759068	24788330	96	20	2.3269	0.0099861
CREG2	2	101952013	102014057	236	30	2.3268	0.0099885
WIPF1	2	175414300	175557644	307	46	2.3259	0.010013
PDIA2	16	323152	347215	130	31	2.3245	0.01005
CEPT1	1	111672249	111737724	238	40	2.3233	0.010081
NAA20	20	19987760	20024299	112	22	2.3226	0.0101
CYCS	7	25149710	25174980	108	22	2.3197	0.010178
ADAM18	8	39432008	39597583	528	48	2.3193	0.01019
DXO	6	31927587	31950069	101	33	2.3174	0.010241
NELFE	6	31909864	31936887	114	36	2.3152	0.0103
TRIM8	10	104394253	104428164	90	19	2.3152	0.010301
CST5	20	23846572	23870387	110	24	2.3107	0.010425
DNAH6	2	84733579	85056713	1054	30	2.3105	0.010431
CRK	17	1313983	1376456	285	28	2.3101	0.010442
RUNX1	21	36150098	37386965	4867	256	2.308	0.010499
PHF20L1	8	133777618	133871052	285	25	2.3049	0.010585
HJURP	2	234732062	234773212	262	31	2.3032	0.010635
MEX3B	15	82324119	82348482	89	29	2.3019	0.010671
BDH1	3	197226654	197310194	389	43	2.3018	0.010674
SETD1B	12	122232086	122280562	110	18	2.3009	0.010698
DUSP15	20	30425440	30468550	114	29	2.2977	0.010791
FRMD6	14	51945818	52207445	1072	118	2.2954	0.010854
B4GALNT3	12	559530	682675	632	99	2.2916	0.010963
TBCA	5	76976991	77174604	878	51	2.2912	0.010977
POMT2	14	77731299	77797227	273	38	2.2903	0.011001
FATE1	X	150874507	150901666	60	19	2.2892	0.011034
CAMTA1	1	6835384	7839766	3721	263	2.2889	0.011043
OOSP2	11	59797748	59825517	77	24	2.2851	0.011153
HIST1H4I	6	27097076	27118418	86	25	2.2848	0.011164
CPNE4	3	131242399	132014254	3791	134	2.2839	0.01119
PHYHD1	9	131673174	131714320	103	16	2.2836	0.011198
DERL3	22	24166690	24191315	159	19	2.2798	0.011311
SMCP	1	152840793	152867523	96	14	2.2777	0.011373
KIAA0101	15	64647193	64689886	108	24	2.2759	0.011427
NNMT	11	114118509	114194007	230	54	2.2758	0.011428
CCNE2	8	95881998	95918906	138	26	2.2743	0.011473
HIST1H2BK	6	27096073	27124619	116	28	2.2736	0.011494
AMER2	13	25725822	25756426	72	18	2.2731	0.01151
BMPR2	2	203231659	203442474	499	39	2.273	0.011512
CENPE	4	104016963	104129566	370	28	2.2696	0.011615
SLC4A10	2	162270843	162851792	1680	51	2.2693	0.011624
NUDT8	11	67385409	67407401	115	16	2.2688	0.01164
WDR59	16	74897468	75044071	574	62	2.2676	0.011677
CDC25C	5	137610954	137684044	226	37	2.2673	0.011685
SKIV2L	6	31916857	31947532	137	41	2.2669	0.011698
LEPROT	1	65876270	65911690	102	24	2.2661	0.011723
CCDC120	X	48901101	48937509	21	10	2.2647	0.011765
UBE2W	8	74682332	74801145	260	36	2.2646	0.011767
SPATA5	4	123834229	124250605	2118	46	2.2603	0.011901
UBE2V1	20	48687661	48742496	149	23	2.2581	0.011968
DIMT1	5	61673081	61709766	107	19	2.2577	0.011982
NUP188	9	131699978	131779375	144	22	2.2572	0.011999
ZSCAN2	15	85134217	85181027	161	36	2.2494	0.012245
TMEM92	17	48338767	48368844	107	39	2.2441	0.012412
BOD1	5	173024517	173053663	107	15	2.2439	0.012419
PRR11	17	57222860	57292066	148	24	2.2428	0.012454
LRRTM2	5	138194612	138221057	75	14	2.242	0.012481
PTP4A2	1	32362022	32420457	154	21	2.2418	0.012489
CA4	17	58217297	58258260	87	23	2.2412	0.012506
YTHDF3	8	64071112	64135346	139	36	2.2371	0.012639
TTC12	11	113175251	113264266	276	43	2.2362	0.012668
LRRC14	8	145733376	145760557	55	11	2.2317	0.012817
RAC2	22	37611301	37650488	235	33	2.2312	0.012834
HMGXB3	5	149369884	149442386	235	26	2.2309	0.012845
PRDM14	8	70953886	70993928	128	25	2.2308	0.012848
NELFA	4	1974441	2053630	167	31	2.2303	0.012864
C1QA	1	22952999	22976101	112	18	2.2297	0.012883
UGT2A2	4	70444135	70515360	358	24	2.2282	0.012935
CST9L	20	23535369	23559386	152	12	2.2272	0.012967
COMP	19	18883583	18912123	66	22	2.2263	0.012996
DIP2A	21	47868812	47999926	617	33	2.2261	0.013003
MFSD3	8	145724457	145746596	49	9	2.2261	0.013004
SSH3	11	67060919	67090078	71	16	2.2254	0.013029
SSMEM1	7	129837700	129866683	97	20	2.2248	0.013049
TTF1	9	135241008	135292209	141	28	2.2221	0.013137
FAM134B	5	16463147	16627167	620	69	2.2216	0.013155
SLC39A2	14	21457414	21480030	98	37	2.2215	0.013158
TMEM209	7	129794555	129857610	177	28	2.2209	0.013178
TMEM8C	9	136369708	136403734	110	27	2.2181	0.013274
ANKRD10	13	111520887	111577416	204	24	2.2167	0.013323
TXNDC16	14	52887308	53029240	437	31	2.214	0.013415
GSTZ1	14	77777227	77807940	122	28	2.2078	0.013629
SENP8	15	72396599	72443311	111	20	2.2056	0.013708
KHDC1	6	73941037	74030088	394	29	2.2039	0.013764
ZNF720	16	31714550	31816190	258	15	2.2032	0.013792
TMED9	5	177009159	177033125	81	14	2.201	0.013869
FOPNL	16	15949577	15992482	332	12	2.2004	0.013888
MKRN2	3	12588513	12635212	153	26	2.2001	0.0139
MYO9A	15	72104632	72420918	694	30	2.1999	0.013909
EPHA8	1	22880057	22940087	256	37	2.1987	0.013949
ARHGDIG	16	308726	343003	177	46	2.197	0.014012
CNP	17	40108759	40139749	73	21	2.1969	0.014014
C7orf61	7	100044238	100071894	45	15	2.1954	0.014068
PDLIM3	4	186412851	186466766	172	26	2.1951	0.014079
MUC5AC	11	1141580	1232364	190	22	2.1939	0.014122
NDUFAF4	6	97327189	97355757	140	26	2.1933	0.014144
CWH43	4	48978264	49074098	254	21	2.193	0.014153
ANKRD13D	11	67046018	67079956	72	19	2.1929	0.014156
DENND6A	3	57601184	57688816	264	25	2.1906	0.01424
LRRC39	1	100604409	100653771	128	24	2.1865	0.014389
ZNF618	9	116628562	116828871	748	75	2.1864	0.014393
PCTP	17	53818340	53930191	421	25	2.1847	0.014455
MAN1A2	1	117900071	118081494	590	34	2.1847	0.014456
CCAR2	8	22452145	22489027	179	22	2.1834	0.014504
F2RL3	19	16989671	17013417	83	20	2.1826	0.014534
RNF103-CHMP3	2	86722791	86958245	562	33	2.182	0.014556
CYTH4	22	37668068	37721382	186	39	2.1818	0.01456
KCNMA1	10	78619359	79408353	3220	231	2.1808	0.014598
KRTAP4-16P	17	39247754	39268461	178	12	2.1782	0.014695
ST6GALNAC3	1	76530404	77110286	2394	193	2.1759	0.014783
GPR26	10	125415871	125464123	252	43	2.1746	0.01483
EIF4G1	3	184022283	184063146	103	32	2.1746	0.014831
TMEM189-UBE2V1	20	48687661	48780174	283	27	2.1732	0.014883
TMEM189	20	48687663	48780335	283	27	2.1732	0.014883
GPR150	5	94945782	94967846	69	28	2.1724	0.014914
C1QC	1	22960123	22984603	133	19	2.172	0.014927
HOXA10	7	27200210	27229880	75	31	2.172	0.014928
UQCRB	8	97228148	97257862	71	13	2.1716	0.014941
CCDC155	19	49881475	49931251	197	19	2.1698	0.01501
NSMAF	8	59486063	59582403	301	30	2.1669	0.01512
NFIB	9	14071842	14408982	1312	147	2.1661	0.015151
EPHA5	4	66175281	66546213	1827	95	2.1661	0.015152
ASCC1	10	73846278	73986892	465	37	2.1646	0.015209
LGI1	10	95507566	95567916	264	39	2.1639	0.015235
SIK1	21	44824395	44857008	173	36	2.1636	0.015248
PPP1R16A	8	145693352	145737504	97	16	2.1613	0.015337
DZIP3	3	108298529	108423693	247	37	2.1591	0.015421
ASPSCR1	17	79924683	79985282	136	23	2.1585	0.015446
C10orf120	10	124447225	124469338	86	22	2.1568	0.015513
SMAD3	15	67346101	67497533	558	87	2.1559	0.015547
HIBADH	7	27555061	27712614	668	30	2.1549	0.015586
SRP9	1	225955531	225988168	138	26	2.1545	0.015601
LGALS3BP	17	76957320	76986191	122	36	2.1545	0.015601
SUCLG1	2	84640647	84697169	180	20	2.1544	0.015605
TSC22D4	7	100050982	100086902	73	17	2.1527	0.015669
UBE2D2	5	138896016	139018018	299	27	2.1523	0.015688
POTEF	2	130821108	130896795	17	1	2.1521	0.015696
CSNK1E	22	38676697	38804527	316	57	2.1507	0.015749
RNF20	9	104286133	104335622	159	35	2.1498	0.015786
GPT	8	145718356	145742557	57	11	2.1488	0.015827
ICA1L	2	203630690	203746708	316	28	2.1483	0.015845
IL1RAP	3	190221840	190385843	581	82	2.1471	0.015894
GPR137C	14	53009866	53114431	311	35	2.147	0.015897
C4orf47	4	186337394	186380980	166	27	2.1466	0.015911
NCF2	1	183514698	183570011	176	33	2.1459	0.015941
KNOP1	16	19704902	19739557	115	16	2.1458	0.015945
DRG2	17	17981200	18021285	141	21	2.1443	0.016005
TLL2	10	98114363	98283675	719	81	2.1422	0.016089
OR2Z1	19	8831316	8852371	42	7	2.1422	0.016089
KIAA0930	22	45576219	45646650	350	38	2.1418	0.016104
UBQLN4	1	155995092	156033585	91	32	2.1387	0.016231
ERP44	9	102731461	102871322	305	24	2.138	0.016257
TRMT13	1	100588706	100626053	120	24	2.1379	0.016262
PRMT2	21	48045079	48095036	191	30	2.1372	0.016289
IGSF1	X	130397480	130543677	342	34	2.1363	0.016327
PGF	14	75398537	75432487	128	22	2.1321	0.0165
UGT2A1	4	70444912	70528967	427	34	2.1293	0.016615
BACH1	21	30556392	31013071	1362	103	2.128	0.016667
RNASEL	1	182532769	182568391	107	28	2.1267	0.016723
DYNLL2	17	56150776	56182897	77	18	2.1238	0.016845
TRAF6	11	36498577	36541822	118	26	2.1222	0.016911
ZKSCAN8	6	28099688	28137250	186	22	2.1219	0.016924
CTBS	1	85005289	85050163	184	30	2.1205	0.016982
TRA2B	3	185623694	185665924	133	28	2.1204	0.016986
CCDC12	3	46953216	47033500	249	19	2.12	0.017005
METTL21A	2	208435355	208500652	186	29	2.1196	0.01702
FOXP1	3	70993844	71643140	1888	170	2.1187	0.01706
CREBL2	12	12754761	12808042	117	16	2.1186	0.017062
ABHD10	3	111687857	111722210	195	23	2.1143	0.017243
GDPD1	17	57287828	57363328	169	18	2.1141	0.017251
DNAH9	17	11491748	11883065	1424	123	2.1137	0.01727
ZBTB12	6	31857384	31879769	86	34	2.113	0.0173
LIN28A	1	26727269	26766213	123	28	2.1125	0.017321
HHLA2	3	108005376	108107132	444	37	2.1119	0.017347
UGT2A1	4	70444135	70528965	428	34	2.1118	0.017352
GULP1	2	189146396	189470653	960	46	2.1116	0.01736
MS4A2	11	59845734	59873444	115	22	2.1114	0.017368
KIF4B	5	154383260	154407685	115	20	2.1077	0.017528
ZNF592	15	85281866	85359659	271	34	2.1073	0.017547
TUBA3E	2	130939318	130966034	52	3	2.1063	0.01759
HBA2	16	212846	233709	44	13	2.1047	0.01766
OSGIN1	16	83971887	84009937	270	43	2.1043	0.017675
ERN2	16	23691647	23734821	135	33	2.1039	0.017694
CDH16	16	66932025	66962887	82	22	2.1031	0.017727
ALDH8A1	6	135228528	135281260	142	24	2.1027	0.017746
CYSTM1	5	139544227	139671637	365	26	2.0991	0.017902
KIAA0586	14	58884103	59025216	297	30	2.099	0.017907
RASGRF2	5	80246491	80535975	1243	126	2.0989	0.017911
SMG8	17	57276761	57302608	66	12	2.0964	0.018022
ASPA	17	3365668	3416713	217	40	2.0955	0.018065
TMEM240	1	1460554	1485833	57	11	2.0953	0.018071
ZKSCAN1	7	99603204	99649312	105	27	2.0951	0.018082
SLC16A9	10	61400523	61505760	479	51	2.0924	0.018202
ARHGAP32	11	128824955	129159219	1109	45	2.0922	0.018211
FOXH1	8	145688795	145711718	51	11	2.0899	0.018311
GPS1	17	79998567	80025346	91	22	2.0881	0.018394
GYPC	2	127403509	127464246	282	46	2.0877	0.01841
ENC1	5	73913234	73947249	98	18	2.0854	0.018517
CCDC74B	2	130886860	130912707	44	2	2.0849	0.018538
PSMB5	14	23475752	23514439	92	26	2.0846	0.018551
ZCWPW1	7	99988449	100036615	104	19	2.0843	0.018566
OR2V1	5	180541357	180562304	61	9	2.0835	0.018605
MBOAT7	19	54667107	54703733	132	38	2.0834	0.018609
TAC1	7	97351220	97379784	111	14	2.0829	0.018632
STK10	5	171459077	171625390	733	74	2.0826	0.018642
NOL3	16	67194057	67219643	52	21	2.0822	0.018663
DOLK	9	131697809	131719898	44	8	2.0819	0.018676
PET117	20	18108517	18133813	106	28	2.0807	0.018731
REEP6	19	1481165	1507926	70	9	2.079	0.018806
EEA1	12	93154413	93333107	508	34	2.079	0.01881
KIF2A	5	61591989	61843076	685	32	2.0789	0.018814
DUSP22	6	281630	361355	17	4	2.0788	0.018816
ALS2CR11	2	202342148	202493901	505	29	2.0786	0.018828
PARP6	15	72523522	72575340	149	23	2.0781	0.018849
OCM2	7	97603996	97630481	143	14	2.0779	0.018858
PHLDA3	1	201424620	201448365	96	23	2.0773	0.018889
FAM193A	4	2616988	2744292	577	35	2.0769	0.018905
EXOC3L1	16	67208269	67234107	72	21	2.0767	0.018915
MYO6	6	76448909	76639254	622	37	2.0751	0.018988
WDR45	X	48919385	48968108	26	16	2.0739	0.019046
TBC1D12	10	96152261	96305687	449	39	2.0738	0.01905
GBGT1	9	136018340	136049332	143	44	2.0737	0.019055
NDUFAB1	16	23582323	23617677	129	20	2.0729	0.01909
DCAF4	14	73383040	73436411	268	31	2.0714	0.019161
APOA1BP	1	156551554	156574091	114	9	2.0679	0.019323
C7orf34	7	142626440	142647955	85	14	2.0663	0.019402
IPO11	5	61689799	61934409	616	35	2.0658	0.019425
RPS8	1	45230923	45254451	62	18	2.0645	0.019487
NME5	5	137440866	137485132	129	30	2.0639	0.019512
CBX7	22	39506172	39558679	196	24	2.0635	0.019531
DUS1L	17	80005382	80033763	77	17	2.0622	0.019593
DHRS1	14	24749804	24779039	112	19	2.0617	0.019619
PTMA	2	232561605	232588251	108	16	2.0603	0.019685
NOTUM	17	79900388	79929716	96	10	2.0594	0.019726
LGALS7	19	39251611	39274132	114	18	2.0572	0.019833
GRAMD2	15	72442148	72500126	123	23	2.0562	0.019882
OSM	22	30648818	30672829	72	31	2.0547	0.019955
TTC24	1	156539519	156566562	113	13	2.0542	0.019978
EPHB6	7	142542792	142578847	122	16	2.0533	0.02002
RPS29	14	50033390	50075408	138	20	2.0524	0.020065
MTA3	2	42711709	42994087	809	32	2.0489	0.020234
SCN4B	11	117994092	118033603	164	36	2.0489	0.020237
CYS1	2	10186907	10231071	191	35	2.0486	0.020252
KIAA1919	6	111570551	111602370	98	24	2.0469	0.020335
ABL2	1	179058462	179208819	488	34	2.0457	0.020391
TMEM119	12	108973622	109002096	129	32	2.0446	0.020449
CLEC12A	12	10093915	10158293	396	29	2.0445	0.02045
POLD4	11	67108248	67134443	38	14	2.0436	0.020499
HELLS	10	96295547	96383662	275	26	2.0435	0.020503
HHIPL2	1	222685602	222731445	168	19	2.0427	0.02054
ZNF691	1	43302280	43328148	65	17	2.0418	0.020587
MTMR7	8	17145539	17281037	947	72	2.0406	0.020646
EXOC4	7	132927829	133761342	2485	75	2.0404	0.020656
TOMM20	1	235262651	235302251	97	14	2.0357	0.020892
SUMF1	3	3732498	4518965	4181	179	2.035	0.020926
MED29	19	39871943	39901277	65	16	2.0349	0.020929
YTHDC1	4	69166105	69225807	125	27	2.0323	0.021062
EVA1C	21	33774314	33897707	441	36	2.032	0.021078
MCM4	8	48862745	48900720	54	26	2.0317	0.021092
EFCAB6	22	43914624	44218217	1262	52	2.0316	0.021096
PELP1	17	4564679	4617632	190	18	2.0314	0.021109
LYPLA2	1	24107460	24132029	33	19	2.0309	0.021131
NR1H2	19	50822910	50896239	186	28	2.0308	0.021136
PTPN7	1	202106141	202140716	138	39	2.0305	0.021151
RFNG	17	79995778	80019707	88	22	2.0304	0.021157
MTFR1	8	66546969	66693496	513	34	2.0288	0.021239
ZNF560	19	9567183	9619283	168	8	2.0282	0.021271
HNRNPD	4	83263651	83305656	127	18	2.0282	0.021272
CHN2	7	29151890	29563944	1815	172	2.0275	0.021304
CACNA2D1	7	81565760	82083114	2328	141	2.0269	0.021338
PLIN5	19	4512543	4545236	54	9	2.0263	0.021366
OGDH	7	44636171	44758665	354	39	2.0263	0.021368
NRGN	11	124599742	124627106	69	18	2.0259	0.021386
HUS1B	6	645939	666963	70	19	2.0255	0.02141
PKM	15	72481370	72534164	114	22	2.0242	0.021476
TIGD6	5	149362681	149390730	77	14	2.0232	0.021529
GRIK1	21	30899254	31322351	1628	92	2.0216	0.02161
KCNK2	1	215169118	215420436	1071	47	2.021	0.021639
PSG1	19	43360616	43393974	122	7	2.0207	0.021653
SDK1	7	3331080	4318632	6040	175	2.0199	0.021696
LRRC3C	17	38087727	38111000	101	18	2.019	0.021743
RBFOX1	16	6059095	7773340	13743	566	2.0172	0.021835
DSP	6	7531808	7596950	240	46	2.0169	0.021851
SNAI1	20	48589536	48615423	118	14	2.0168	0.021856
AS3MT	10	104619273	104671656	205	25	2.0164	0.021877
TLR4	9	120456610	120489149	110	28	2.016	0.0219
GPATCH4	1	156554279	156581288	122	10	2.0159	0.021906
ZNF609	15	64742941	64988264	697	36	2.0156	0.02192
SIX6	14	60965669	60989568	63	12	2.0143	0.021991
MZT2B	2	130929310	130958302	54	3	2.0135	0.02203
WNT8A	5	137409581	137438054	73	16	2.011	0.022162
MEPCE	7	100016413	100041741	53	10	2.0093	0.022255
SLC22A9	11	63127261	63187766	269	32	2.0091	0.022261
IGIP	5	139495521	139518391	43	20	2.0089	0.022272
TRIM13	13	50560024	50604617	100	19	2.0074	0.022353
ZNF493	19	21569921	21620375	214	23	2.007	0.022373
KIAA0895L	16	67199505	67227943	61	22	2.0064	0.022405
BIN3	8	22467931	22536661	270	27	2.0057	0.022445
KIAA0087	7	26562740	26588407	167	23	2.0054	0.022459
FAM20B	1	178984939	179055697	305	27	2.0047	0.0225
BAIAP3	16	1373602	1409439	169	40	2.0045	0.022506
TXNRD1	12	104599557	104754061	642	40	2.0038	0.022548
HAAO	2	42984229	43029733	222	24	2.0028	0.0226
SOWAHB	4	77806082	77829002	72	10	2.0016	0.022664
HKR1	19	37793739	37870267	243	35	2.0013	0.022679
SYT11	1	155819300	155864990	96	22	2.0011	0.022692
C8orf58	8	22447114	22471663	102	18	2.001	0.022695
MEOX1	17	41707756	41749322	162	31	2.0005	0.022722
TNIP2	4	2733375	2768103	195	38	1.9991	0.022797
TTR	18	29161689	29188974	82	20	1.997	0.022911
PNPLA1	6	36200980	36286372	339	69	1.9964	0.022943
FAM124A	13	51786503	51868377	284	56	1.9963	0.022952
YBX2	17	7181571	7207934	82	24	1.9961	0.022963
SLC12A5	20	44640356	44698784	229	37	1.9952	0.023011
OR3A2	17	3171193	3192268	90	8	1.9948	0.023034
MROH1	8	145192919	145326843	80	12	1.9942	0.023067
BAI1	8	143520791	143636370	337	58	1.9935	0.023105
TNFRSF13B	17	16822849	16885432	346	39	1.9933	0.023117
PYCR1	17	79880260	79910288	57	8	1.9917	0.023202
PPP1R3G	6	5075720	5097455	92	21	1.9883	0.023388
CSF1R	5	149422854	149502935	318	59	1.9877	0.023422
C10orf32	10	104603980	104634718	106	21	1.9872	0.023448
C1QB	1	22969255	22998031	149	25	1.9863	0.0235
HIST1H2AH	6	27104861	27125317	80	25	1.9856	0.023541
NYAP1	7	100071550	100102422	77	13	1.9846	0.023593
FBXL4	6	99306420	99405849	262	28	1.9839	0.023632
TNFRSF1A	12	6427923	6461280	84	19	1.9839	0.023635
SMARCB1	22	24119150	24186703	483	31	1.9825	0.023709
TNFRSF19	13	24134509	24260232	562	56	1.9825	0.023711
LRR1	14	50055415	50091390	144	16	1.9818	0.023753
PSMD9	12	122316637	122366203	154	20	1.9817	0.023757
ZSCAN12	6	28336732	28377511	205	25	1.9815	0.02377
PTPN13	4	87505468	87746324	821	19	1.9811	0.023791
BDKRB1	14	96712161	96745304	149	37	1.9792	0.023899
ADRBK1	11	67023881	67064027	72	20	1.9791	0.023904
C1orf50	1	43222940	43273968	164	39	1.9788	0.023921
OR2G6	1	248674916	248695964	27	2	1.9777	0.023983
TGM3	20	2266647	2331724	209	30	1.9777	0.023983
UFL1	6	96959471	97013152	137	31	1.976	0.024078
ESX1	X	103484719	103509614	41	17	1.9738	0.024203
INPP5B	1	38316369	38422729	291	31	1.9714	0.024339
EXOSC10	1	11116675	11169938	164	9	1.9714	0.024341
RALGDS	9	135963107	136049301	345	58	1.9696	0.024444
RP9	7	33124409	33159013	156	23	1.9692	0.024464
PSMF1	20	1083906	1170596	291	54	1.9685	0.024505
SH3GLB1	1	87160259	87223867	189	35	1.9681	0.024531
FARSB	2	223425255	223531056	334	30	1.9675	0.024562
GALE	1	24112089	24137271	33	11	1.9673	0.024577
NIPAL4	5	156877027	156911725	136	26	1.9672	0.024581
PRSS8	16	31132756	31157083	45	14	1.9671	0.024587
PITHD1	1	24094895	24124722	42	23	1.9666	0.024617
MYADML2	17	79887521	79915109	70	8	1.9659	0.024653
DYX1C1	15	55692723	55810432	567	40	1.964	0.024764
STARD10	11	72455774	72514726	168	24	1.964	0.024766
RNF149	2	101877681	101935163	152	36	1.9635	0.024792
SECISBP2	9	91923421	91984557	213	39	1.9633	0.024806
MXRA7	17	74658633	74717098	228	27	1.9622	0.02487
HMG20B	19	3562775	3589086	56	12	1.9609	0.024948
MITF	3	69778586	70027488	845	39	1.9605	0.024967
ZNF131	5	43055278	43202123	593	39	1.9602	0.024987
SCEL	13	78099809	78229398	414	47	1.9594	0.025035
MYT1	20	62773144	62883604	448	74	1.9592	0.025044
SYNGR2	17	76154639	76179608	119	25	1.9585	0.025088
INSR	19	7102266	7304045	1062	110	1.9573	0.025159
SMPD4	2	130898981	130950323	88	4	1.9572	0.025161
DGKD	2	234253153	234390750	453	49	1.9569	0.025179
BCAS4	20	49401431	49503714	404	46	1.9565	0.025206
ARF4	3	57547090	57593947	155	24	1.9555	0.025261
C10orf32-ASMT	10	104604029	104671656	258	23	1.9552	0.025281
ZCCHC13	X	73514025	73534868	37	4	1.9545	0.025323
PPP2R5B	11	64675025	64711945	121	22	1.9535	0.02538
GHDC	17	40330817	40356531	25	15	1.9532	0.025396
MTSS1	8	125553031	125750730	936	114	1.9527	0.025426
FAM120C	X	54084757	54219714	56	11	1.9522	0.025455
NMD3	3	160812484	160981320	478	32	1.9521	0.025466
STIM1	11	3865757	4124439	871	41	1.9519	0.025474
NT5C2	10	104835940	104963056	417	33	1.9505	0.025561
WDR12	2	203729505	203889521	411	27	1.95	0.025591
DPF3	14	73076004	73370809	1316	118	1.9483	0.025687
LRG1	19	4526421	4550486	38	6	1.9459	0.025832
SLITRK4	X	142700596	142733596	49	9	1.9455	0.025859
TP53AIP1	11	128794626	128823040	134	38	1.945	0.025885
SPTSSB	3	161052580	161100668	239	32	1.9448	0.025897
INTS12	4	106593784	106827143	690	25	1.9446	0.02591
CHTF8	16	69142757	69164331	61	24	1.9414	0.026105
RASGEF1B	4	82337547	82975397	2627	122	1.9414	0.026107
OR52H1	11	5555719	5576779	149	13	1.9397	0.026206
CLEC1B	12	10128241	10176023	264	27	1.9397	0.026209
PRSS36	16	31140246	31171415	53	20	1.9394	0.026228
VTI1A	10	114196756	114588503	1064	135	1.9385	0.026281
AURKA	20	54934445	54977393	130	34	1.9377	0.026331
NR2C1	12	95404005	95477479	221	36	1.9358	0.026443
FKBPL	6	32086484	32108068	77	32	1.9349	0.0265
NBEAL2	3	47011173	47061193	127	19	1.9338	0.026569
TNFRSF11B	8	119925796	119974439	190	29	1.9328	0.026632
SLC9A5	16	67261586	67316093	104	27	1.932	0.026683
MXI1	10	111957363	112057123	368	34	1.9306	0.026765
ATP11A	13	113334643	113551482	1062	82	1.9296	0.02683
CAPZA2	7	116441124	116572103	355	39	1.9286	0.026889
2004-03-01	2	217112588	217246750	452	58	1.9269	0.026994
AQR	15	35137732	35272040	498	33	1.9269	0.026995
MYO15A	17	18002020	18093116	292	40	1.9269	0.026997
EVX1	7	27272164	27300112	88	20	1.9267	0.027006
EIF2B3	1	45306450	45462282	570	22	1.9244	0.02715
TRIM21	11	4396127	4424926	163	19	1.9235	0.027211
CCDC110	4	186356336	186402913	226	44	1.9228	0.02725
MTX1	1	155168490	155193615	39	11	1.9227	0.02726
PPP3R2	9	104343897	104367283	88	25	1.9225	0.027272
GOSR2	17	44990483	45115003	506	29	1.9218	0.027316
L2HGDH	14	50694281	50789266	352	30	1.9216	0.02733
GPR151	5	145882666	145905753	69	14	1.9202	0.027417
PPM1L	3	160463390	160806695	992	45	1.9176	0.027578
CBFB	16	67053019	67144961	236	37	1.9166	0.027641
SEMA4D	9	91965702	92123045	782	74	1.9148	0.027761
NFATC2IP	16	28952128	28988418	72	15	1.9146	0.027774
HNF4G	8	76310149	76489078	888	56	1.9136	0.027836
SASS6	1	100539119	100608511	266	24	1.9132	0.027863
CARF	2	203766937	203861786	238	22	1.913	0.027875
TVP23C	17	15331205	15476909	472	46	1.9128	0.027888
TSSK4	14	24664903	24687568	82	19	1.9075	0.028227
OXER1	2	42979642	43001401	84	22	1.9074	0.028234
LRRC47	1	3686784	3723068	192	23	1.9068	0.028272
SP4	7	21457652	21564440	545	54	1.906	0.028322
CLDN16	3	190030330	190139932	727	45	1.9053	0.028372
SRSF7	2	38960741	38988636	70	18	1.905	0.028387
PIK3CG	7	106495723	106557590	178	37	1.9049	0.028393
VSIG2	11	124607368	124632134	60	19	1.9048	0.028405
INVS	9	102851538	103073282	609	26	1.9041	0.028449
ADORA3	1	112015970	112116584	421	63	1.9038	0.028468
CHDC2	X	36043908	36173187	182	11	1.9023	0.028569
PLEKHG2	19	39893225	39929054	106	27	1.9014	0.028624
MFAP3	5	153408466	153610038	747	57	1.9013	0.02863
ADRA1A	8	26595667	26734790	782	75	1.901	0.028654
SLC7A2	8	17344597	17438082	629	97	1.9005	0.028681
RETSAT	2	85559211	85591743	94	20	1.8996	0.028742
FBXW5	9	139824887	139849148	105	20	1.898	0.028851
COPS7B	2	232636381	232683963	143	23	1.8978	0.028861
MICU3	8	16874747	16990153	507	44	1.8978	0.028863
C8orf82	8	145741117	145764516	44	10	1.897	0.028916
KLK6	19	51451887	51482929	75	17	1.8962	0.028966
SDHB	1	17335217	17390665	199	22	1.8961	0.028972
OR5P3	11	7836584	7857519	161	17	1.8958	0.028994
ANGPTL7	1	11239398	11266038	54	6	1.8953	0.029026
PPIL6	6	109701418	109772374	250	26	1.894	0.029112
PWP2	21	45517171	45561063	169	23	1.8931	0.029175
MCCD1	6	31486494	31508009	188	31	1.8928	0.029189
NCR2	6	41293393	41328625	239	38	1.8927	0.029196
SYNPO2	4	119799996	119992402	813	79	1.8925	0.029215
KIF20A	5	137504408	137533404	87	28	1.8922	0.029235
RPH3A	12	112998184	113346686	818	81	1.8904	0.029352
C8G	9	139829698	139851426	92	18	1.8903	0.029361
KCNRG	13	50579390	50605058	57	16	1.8898	0.029391
FBXO24	7	100171605	100208740	89	32	1.8898	0.029394
FAM184A	6	119270928	119480552	920	75	1.8895	0.029412
PLXNB2	22	50703408	50756056	232	45	1.8893	0.029428
TGOLN2	2	85535147	85565548	112	16	1.8867	0.029598
APH1B	15	63558217	63611325	180	41	1.8866	0.029608
CBY3	5	179095584	179117975	81	15	1.8846	0.029741
LRRC38	1	13791445	13850543	288	52	1.8845	0.029749
MICAL1	6	109755265	109797171	125	26	1.8838	0.029794
DDX23	12	49213547	49256625	82	20	1.8834	0.029823
RYK	3	133774147	133979689	721	38	1.8831	0.029843
HAO2	1	119901402	119946753	208	30	1.8826	0.029876
UNK	17	73770681	73831886	214	35	1.8809	0.029996
TVP23C-CDRT4	17	15329338	15476875	475	45	1.8796	0.03008
L1CAM	X	153116969	153184677	99	17	1.8796	0.030083
C16orf91	16	1459745	1489345	119	24	1.8791	0.030115
ABLIM3	5	148511046	148650105	450	42	1.8783	0.03017
PCYT2	17	79848841	79879340	19	12	1.8782	0.030174
SPARC	5	151030657	151076726	153	31	1.8769	0.030265
NCKAP5L	12	50174929	50232533	213	28	1.8751	0.030387
SYT3	19	51114564	51181651	192	41	1.8748	0.030408
ERMN	2	158165137	158194225	25	5	1.8736	0.030493
LRRC24	8	145737761	145762416	51	10	1.8735	0.030503
OPRK1	8	54128284	54174257	248	25	1.8725	0.030571
TLK1	2	171837333	172097824	760	31	1.8723	0.030583
SLC38A11	2	165742696	165822035	285	27	1.8717	0.030626
CEP41	7	130023612	130092274	172	37	1.8712	0.030655
EGR1	5	137791179	137815004	75	17	1.8712	0.030661
NR5A1	9	127233516	127279709	107	18	1.8707	0.030695
EHMT2	6	31837536	31875464	170	45	1.8696	0.030772
RNF32	7	156422975	156479824	209	36	1.8693	0.030792
EML2	19	46100252	46158887	206	37	1.8692	0.030798
CRTC1	19	18784487	18903004	371	48	1.8691	0.030804
CEP95	17	62492706	62548579	87	10	1.8689	0.030818
CNNM2	10	104668050	104859978	663	39	1.8685	0.030847
TIGIT	3	113985760	114039135	170	38	1.8681	0.030874
E2F4	16	67216072	67242821	86	20	1.868	0.030881
VAX1	10	118878032	118907812	53	13	1.868	0.030882
EIF2S3	X	24062833	24106088	61	6	1.8675	0.030914
SGCD	5	155287354	156204799	3800	147	1.8671	0.030944
CHMP2B	3	87266421	87314698	138	24	1.8669	0.030961
KRTAP4-6	17	39285685	39306739	84	19	1.8652	0.031077
ASNS	7	97471430	97511854	165	22	1.8644	0.031134
MFSD7	4	665618	693230	89	25	1.8624	0.031275
C1orf195	1	15480840	15507813	134	22	1.8615	0.031339
DNTT	10	98054085	98108321	272	26	1.8612	0.031359
FAM57A	17	625652	656206	152	31	1.8604	0.031416
PPP1R35	7	100022905	100044188	44	9	1.8597	0.031464
PAF1	19	39866492	39891835	72	20	1.8588	0.031529
CHTF8	16	69141913	69176487	86	33	1.8581	0.031575
PRSS48	4	152188323	152222605	139	18	1.8575	0.031624
NACA2	17	59657794	59678563	64	10	1.8558	0.031738
RGSL1	1	182409256	182539734	606	43	1.8557	0.031746
TRIM45	1	117643682	117675209	110	25	1.8544	0.031839
BMP8A	1	39947318	40001607	187	35	1.8543	0.031845
SCHIP1	3	159547650	159625149	202	50	1.8542	0.031854
TMEM208	16	67251006	67273181	41	13	1.8526	0.031973
GUCY2C	12	14755576	14859519	341	34	1.8523	0.031991
RUNX2	6	45285894	45642086	1273	98	1.8522	0.031997
LRRC29	16	67231042	67270951	100	21	1.8516	0.032039
MRPL33	2	27984584	28220954	634	34	1.8502	0.032144
DHRS4L2	14	24429148	24485617	246	34	1.8501	0.032149
NXPH2	2	139418342	139547918	432	58	1.85	0.032153
SYVN1	11	64879252	64912004	96	31	1.85	0.032158
TMEM110	3	52860235	52941612	282	20	1.8489	0.032233
SMPD2	6	109751966	109775122	72	20	1.848	0.032302
TST	22	37396900	37425681	152	23	1.8479	0.032305
C3orf83	3	12546433	12612558	254	22	1.8476	0.032332
IFNLR1	1	24470647	24524449	277	37	1.8472	0.032359
C19orf83	19	46134752	46156098	73	15	1.8438	0.032609
ZNF441	19	11867815	11904893	167	15	1.8437	0.032613
C15orf38-AP3S2	15	90367540	90466114	253	18	1.8425	0.032703
ORMDL3	17	38067294	38093854	104	19	1.8424	0.032709
POU1F1	3	87298554	87335737	102	20	1.8421	0.032727
DCDC1	11	30841916	31401357	1305	53	1.8421	0.03273
IQCK	16	19717778	19878907	493	31	1.8419	0.032742
CLK2	1	155222659	155258282	73	10	1.8413	0.032792
CD8A	2	87001729	87045519	103	13	1.8406	0.032842
DIRAS3	1	68501645	68527314	88	18	1.8384	0.032999
GSTCD	4	106619935	106778885	465	22	1.8383	0.03301
INTS2	17	59932731	60015377	220	34	1.8383	0.033012
FHL5	6	97000424	97074512	363	29	1.8376	0.033058
VWA5B1	1	20607412	20691387	384	43	1.8365	0.033144
TPST2	22	26911458	27002681	451	61	1.8356	0.033212
ZSCAN23	6	28389707	28421279	138	23	1.8351	0.033249
LRCH4	7	100159855	100193776	85	24	1.8344	0.033298
NHLRC1	6	18110718	18132851	118	19	1.8341	0.033323
BZW2	7	16675756	16756148	312	46	1.834	0.033327
RBBP8NL	20	60975293	61012589	206	46	1.8333	0.033376
GDF5OS	20	34010827	34033248	84	12	1.8333	0.033377
PLEKHA1	10	124124212	124201867	300	32	1.8332	0.033388
SRI	7	87824433	87866308	105	22	1.8327	0.033425
ELAVL2	9	23680102	23836335	661	82	1.8326	0.033431
2015-09-01	1	87318132	87390107	260	20	1.8306	0.03358
RND1	12	49240928	49269681	68	20	1.8305	0.03359
MTRNR2L9	6	62274008	62294534	166	14	1.8304	0.033598
CLDN3	7	73173328	73194600	56	13	1.8286	0.033733
MBD5	2	148768580	149285805	1613	76	1.8264	0.033897
NUDT4	12	93761659	93807024	145	31	1.8253	0.033979
KDM3B	5	137678285	137782717	315	32	1.8247	0.034023
CDADC1	13	49812047	49877618	160	19	1.8242	0.034064
CNIH3	1	224612362	224938251	1276	79	1.8234	0.034124
ALDH1A3	15	101407919	101466831	245	29	1.8223	0.034207
COL19A1	6	70566463	70929679	1367	97	1.8218	0.034243
C1orf94	1	34622484	34694732	318	46	1.819	0.034458
FKBP1A	20	1339622	1383806	197	40	1.8189	0.034467
RNF103	2	86820516	86860989	124	18	1.817	0.034605
EIF4E	4	99782835	99861788	291	24	1.8164	0.034651
LRRC70	5	61864562	61887275	44	15	1.8164	0.034653
SH3GLB2	9	131759315	131800582	104	23	1.8163	0.034663
UPP2	2	158723214	159002666	1122	95	1.8163	0.034665
PLP2	X	49018273	49041588	17	8	1.815	0.034761
DLGAP2	8	1439532	1666642	1407	77	1.8139	0.034845
PROX2	14	75309736	75340537	105	24	1.8134	0.034883
TMEM237	2	202474907	202518293	119	27	1.8132	0.034899
ARRB2	17	4603784	4634794	135	20	1.8131	0.034909
EMB	5	49682026	49749082	186	20	1.8121	0.034987
USP26	X	132148659	132241137	167	9	1.8101	0.035141
OR2C1	16	3395889	3416924	123	17	1.8092	0.035209
LTB4R	14	24770656	24797242	85	21	1.8084	0.035271
ELP2	18	33699407	33767909	244	30	1.8083	0.035283
CCDC166	8	144778864	144800279	63	18	1.8062	0.035441
SCAMP3	1	155215770	155242221	57	7	1.8062	0.035447
SCAP	3	47445203	47528616	152	30	1.8053	0.035515
TEX10	9	103054359	103125221	199	24	1.8052	0.035521
TACR3	4	104497188	104650973	602	45	1.8047	0.035563
ZBTB24	6	109773797	109814440	116	25	1.8045	0.03558
INHA	2	220423884	220450435	71	18	1.8033	0.035669
SLC37A1	21	43906118	44011550	566	37	1.8031	0.035689
DKKL1	19	49855040	49888373	152	11	1.8024	0.035742
NAT9	17	72756686	72782506	69	8	1.8023	0.035752
ANKLE2	12	133292254	133348474	282	40	1.8015	0.03581
TIMP3	22	33187687	33269030	292	49	1.8007	0.035873
ANKUB1	3	149468892	149696172	751	51	1.7995	0.03597
C6orf58	6	127830600	127922962	416	26	1.799	0.036006
BSG	19	561297	593493	149	17	1.7986	0.036045
BCAT1	12	24954295	25112393	770	70	1.7984	0.036054
SETX	9	135126743	135240372	480	24	1.7973	0.036143
NDUFV1	11	67364323	67390006	91	15	1.7971	0.036161
GMCL1	2	70046774	70118528	164	20	1.7968	0.036181
CCDC39	3	180310646	180598793	965	73	1.7966	0.036199
FAM96B	16	66955959	66978326	52	20	1.7943	0.036382
MICB	6	31452658	31488901	502	37	1.7942	0.036393
IGFBP6	12	53481220	53506129	79	12	1.7931	0.036481
IL12B	5	158731791	158767895	93	22	1.7928	0.036502
ESYT3	3	138143428	138210528	210	43	1.7919	0.036571
C16orf70	16	67133861	67192442	114	32	1.7917	0.036593
PABPC4	1	40016488	40052462	120	24	1.7912	0.03663
RGS18	1	192117587	192164945	110	23	1.7901	0.036719
PRSS1	7	142447319	142470923	54	5	1.7901	0.03672
SZRD1	1	16669070	16734640	197	24	1.7893	0.03678
ZNF165	6	28038753	28067341	131	23	1.7878	0.036903
HEY1	8	80666245	80690098	59	22	1.7872	0.036951
ADAM33	20	3638612	3672893	197	56	1.7845	0.037167
OR2Y1	5	180156042	180177099	65	12	1.7837	0.037236
NKAIN3	8	63151150	63922211	3388	97	1.7836	0.037245
BRD8	5	137465455	137524675	152	32	1.7835	0.037249
PCCA	13	100731269	101192686	1270	65	1.783	0.037296
PGAM4	X	77213458	77235135	8	4	1.7829	0.037299
METTL10	10	126426718	126490439	159	25	1.7815	0.037416
AGPAT4	6	161541011	161705093	665	72	1.7813	0.037429
TNFRSF10D	8	22983101	23031543	179	44	1.781	0.037453
WBSCR27	7	73238920	73266865	86	5	1.7806	0.037492
PGAM5	12	133277405	133309228	137	26	1.7806	0.037493
THOP1	19	2775458	2823599	124	16	1.7799	0.037549
BLOC1S3	19	45672003	45695059	68	14	1.7796	0.037572
MOB1B	4	71758043	71898166	300	23	1.7788	0.037636
MUC19	12	40777197	40974632	1313	45	1.7778	0.037721
HSD11B1	1	209849510	209918295	182	25	1.7776	0.037736
TMEM74B	20	1151205	1176059	66	32	1.7764	0.03783
GPR152	11	67208772	67230200	70	13	1.7763	0.03784
CYP21A2	6	31996042	32019447	65	31	1.7763	0.037841
PDLIM7	5	176900395	176934607	46	15	1.7761	0.03786
TMEM110-MUSTN1	3	52857137	52941578	293	19	1.7761	0.037862
ANKRD34C	15	79565146	79600580	93	26	1.7757	0.037889
IDH1	2	209090951	209140798	166	34	1.7756	0.037903
C1QBP	17	5326097	5362150	146	26	1.7751	0.037938
LHFPL3	7	103959104	104559001	2715	155	1.7722	0.038179
HLA-C	6	31226526	31249907	910	34	1.7716	0.038232
ELMO3	16	67223014	67247932	73	16	1.7714	0.038249
CCPG1	15	55622230	55710708	433	37	1.7695	0.038402
POLR3A	10	79724907	79799303	279	32	1.7695	0.038409
GSDMA	17	38109226	38144019	166	22	1.7688	0.038466
ACOT1	14	73993818	74020498	63	12	1.7688	0.038467
KIAA1524	3	108258716	108318491	155	33	1.7683	0.038507
PALB2	16	23604488	23662631	209	24	1.7674	0.038579
HM13	20	30092231	30167370	187	12	1.7669	0.038623
NRP2	2	206536714	206672857	445	98	1.7667	0.038643
P2RX2	12	133185366	133208972	118	18	1.7664	0.038665
MUTYH	1	45784835	45816142	84	25	1.7654	0.038748
MMP27	11	102552218	102586537	204	34	1.764	0.038866
D2HGDH	2	242663994	242718231	186	25	1.7628	0.03897
FAM196B	5	169281268	169417744	521	75	1.7622	0.039021
PIGB	15	55601158	55657846	243	38	1.7619	0.039044
MEF2D	1	156423519	156480620	150	28	1.7617	0.03906
ASB13	10	5670830	5718558	350	54	1.7611	0.039113
SORBS3	8	22392499	22443301	154	40	1.7609	0.039127
ZNF502	3	44744135	44775323	114	18	1.7605	0.039163
C11orf96	11	43936892	43975888	176	45	1.7602	0.039183
AVPR2	X	153157985	153182620	41	9	1.7594	0.039258
WDR82	3	52278437	52332036	117	19	1.7592	0.039271
KLHL3	5	136943189	137081779	381	42	1.7589	0.039299
SPDYA	2	28995383	29083477	290	28	1.7588	0.039307
MAGEB16	X	35806459	35831852	65	3	1.7588	0.039309
ATP6V0E1	5	172400760	172472448	256	36	1.7581	0.039363
C16orf47	16	73150536	73188346	152	31	1.758	0.039371
KIAA1551	12	32102304	32156039	304	41	1.7577	0.039401
CDK6	7	92224235	92475908	456	62	1.7571	0.039448
LRRC45	17	79971178	79999027	86	14	1.7551	0.039622
ZNF583	19	56899335	56957404	166	25	1.7539	0.039728
MB21D1	6	74113238	74171999	167	44	1.7529	0.039806
ZCCHC18	X	103346822	103370533	26	9	1.7527	0.039829
MCC	5	112347796	112834527	2401	83	1.7526	0.039834
SCUBE1	22	43583289	43749394	920	126	1.752	0.039889
EFNB1	X	68038840	68071990	46	14	1.7518	0.039904
BATF	14	75978768	76023358	157	27	1.7499	0.040072
HBQ1	16	220452	241180	50	15	1.7493	0.040119
SRD5A1	5	6623456	6679675	264	31	1.7488	0.040164
NCALD	8	102688771	103147135	2120	116	1.7482	0.040212
SIRT7	17	79859815	79889199	11	8	1.747	0.040315
CLDN4	7	73203872	73257014	140	10	1.747	0.04032
TCF4	18	52879562	53342018	1173	86	1.7467	0.040348
TCTEX1D1	1	67208142	67254470	158	23	1.7449	0.0405
AP3S2	15	90363831	90447574	237	22	1.7447	0.040515
PSG8	19	43246838	43369843	427	23	1.7442	0.040565
GEMIN4	17	637654	667239	132	25	1.7435	0.04062
SEC11A	15	85202775	85269947	217	43	1.7433	0.040644
HNRNPA0	5	137077075	137100039	40	17	1.7425	0.040714
SLC26A8	6	35901291	36002645	338	43	1.7421	0.040744
VTA1	6	142458367	142555826	268	20	1.7418	0.040772
TIMM23	10	51582080	51633365	17	6	1.7411	0.040836
MAFG	17	79866146	79895590	12	9	1.7405	0.040882
RBM44	2	238697032	238761451	220	34	1.7398	0.040949
FAM189B	1	155206996	155235274	65	9	1.7394	0.040982
TTLL9	20	30448505	30542764	217	40	1.7391	0.041006
UNC13C	15	54295101	54930806	3252	157	1.7391	0.041008
RAB8B	15	63471668	63569981	337	39	1.7391	0.041008
EIF5AL1	10	81262357	81286188	63	9	1.7387	0.041044
PRDM5	4	121596074	121854025	1200	56	1.7383	0.041079
EPYC	12	91347456	91408803	297	20	1.7382	0.04109
SLMAP	3	57731177	57924895	460	41	1.7381	0.041093
RABGEF1	7	66137151	66286451	603	28	1.7368	0.041208
MTMR9	8	11131925	11195646	230	22	1.7366	0.041231
DNAJC24	11	31381387	31463396	200	32	1.7364	0.041248
LCA10	X	153136127	153164444	53	10	1.7363	0.041255
OR5P2	11	7807452	7828520	207	10	1.7355	0.041327
PON2	7	95024175	95074510	226	34	1.7353	0.041343
RDM1	17	34235070	34267777	110	9	1.7352	0.041356
CACNB3	12	49197577	49232724	66	22	1.7347	0.041399
FAM115A	7	143538468	143609291	68	18	1.7345	0.041416
HBA1	16	216679	237521	46	13	1.7341	0.041447
KRT3	12	53173469	53199901	115	29	1.7341	0.041454
TMEM219	16	29942206	29994373	80	9	1.7337	0.041484
ARAP1	11	72386114	72514644	432	44	1.7336	0.041494
ZNF350	19	52457596	52500109	193	23	1.733	0.04155
CHMP4A	14	24668789	24693075	78	20	1.7329	0.041557
LINC00935	12	49111218	49169569	155	28	1.7316	0.041675
CRYBA1	17	27563881	27591512	76	19	1.7311	0.041717
ST7-OT4	7	116583953	116748860	378	60	1.7307	0.041751
TMEM42	3	44893361	44917162	88	22	1.7297	0.041838
C10orf40	10	61705188	61730671	112	20	1.7297	0.041843
SP5	2	171561861	171584588	81	16	1.7294	0.041869
HTR5A	7	154852034	154887459	233	26	1.7278	0.042013
HEYL	1	40079825	40115617	121	39	1.7277	0.042021
KRT74	12	52949566	52977609	177	39	1.7267	0.042108
SUMO1	2	203060903	203113331	135	20	1.7252	0.042247
PPIP5K1	15	43815660	43892430	92	21	1.7251	0.042255
EMILIN2	18	2837028	2925991	261	59	1.725	0.042265
OR1E2	17	3326164	3347135	72	13	1.7247	0.042292
WBSCR28	7	73265489	73290223	71	12	1.724	0.042356
PARP1	1	226538392	226605780	263	23	1.7239	0.042361
RGS11	16	308300	335980	125	35	1.7235	0.042396
SFMBT1	3	52927588	53090766	476	33	1.7232	0.042422
C20orf202	20	1174098	1198918	105	15	1.7228	0.042463
ACY3	11	67400026	67428130	118	24	1.7223	0.042505
ZNF707	8	144756622	144806068	181	37	1.7205	0.042669
ZCCHC3	20	267737	290965	98	24	1.7198	0.042736
OR5A1	11	59200617	59221667	96	12	1.7189	0.042814
OR10H1	19	15907817	15928936	94	13	1.7189	0.04282
LIFR	5	38465065	38618456	289	30	1.7177	0.042922
CD83	6	14107872	14147149	159	35	1.7164	0.043044
URI1	19	30404551	30516611	296	27	1.7148	0.043192
SPIN2A	X	57150963	57174058	24	4	1.7142	0.04325
AGFG2	7	100126834	100175842	99	21	1.7135	0.043315
TRAPPC10	21	45422200	45536433	375	28	1.7128	0.043371
KRTAP4-8	17	39243233	39264393	204	12	1.7104	0.043593
RAB27A	15	55485164	55621311	641	52	1.7103	0.043601
RPRML	17	45045523	45066614	116	16	1.7099	0.043639
PDE12	3	57532003	57562571	93	20	1.7084	0.043783
IFIT1B	10	91127813	91154962	122	30	1.7082	0.043798
OR5AN1	11	59121885	59142921	84	9	1.708	0.043823
GJE1	6	142444227	142466288	62	14	1.7077	0.043846
AQP7	9	33374765	33412643	113	28	1.7071	0.043905
VBP1	X	154415284	154478098	81	11	1.7065	0.043958
RPS6KL1	14	75360657	75400099	151	28	1.7058	0.044026
SCTR	2	120187419	120292070	526	49	1.7053	0.044068
KPNA4	3	160202783	160293376	241	36	1.7048	0.044112
ZSCAN9	6	28182664	28211260	122	27	1.7041	0.04418
OR51T1	11	4893049	4914113	85	23	1.7038	0.044214
SPERT	13	46266446	46298694	133	29	1.7031	0.044271
YTHDC2	5	112839380	112940982	519	26	1.7027	0.044312
ACTN1	14	69330860	69456157	606	68	1.6989	0.044667
LRRC43	12	122642285	122698018	210	33	1.6981	0.044744
GHRL	3	10317359	10344631	104	26	1.697	0.044845
MORC2	22	31311117	31374284	163	30	1.6938	0.045152
ZSCAN16	6	28082338	28107860	105	18	1.6935	0.045183
ASB15	7	123197064	123287951	293	31	1.6932	0.045207
TRAM1L1	4	117994718	118016736	67	16	1.6927	0.045253
SAMD4B	19	39823036	39886350	181	30	1.6926	0.045269
PDCL3	2	101169152	101203197	121	18	1.6923	0.045297
SGTA	19	2744712	2793369	173	16	1.69	0.045512
TAF4	20	60518525	60650866	469	35	1.6898	0.045528
SPANXN2	X	142785055	142814516	74	5	1.6891	0.045601
LITAF	16	11631853	11740237	519	57	1.6883	0.045681
ZBTB47	3	42685176	42719072	104	28	1.6879	0.045712
TAOK2	16	29974962	30013582	77	12	1.6879	0.045713
YLPM1	14	75220069	75332244	310	27	1.6869	0.045815
ZNF570	19	37948487	37986260	88	20	1.6867	0.04583
HOXA9	7	27192054	27220117	72	25	1.6865	0.045849
UBXN6	19	4434996	4467819	141	24	1.6861	0.045886
C19orf60	19	18689495	18713146	96	21	1.6853	0.045967
BHLHE40	3	5010801	5037008	91	21	1.6847	0.046024
RNF13	3	149520495	149689926	508	39	1.6847	0.046024
SBK3	19	56042023	56066909	138	31	1.6844	0.046049
OR5A2	11	59179416	59200449	69	12	1.6844	0.046056
CARD17	11	104953196	104982158	104	14	1.6839	0.046103
PCNXL2	1	233109181	233441459	1481	102	1.6836	0.046134
OR5M9	11	56219945	56240877	80	12	1.6832	0.046167
GM2A	5	150581711	150660001	358	48	1.683	0.046192
GOLGA5	14	93250576	93316308	364	22	1.6828	0.046208
TSR3	16	1389241	1411912	85	29	1.6828	0.046209
ZNF527	19	37851963	37893968	106	24	1.6826	0.046222
ATF6B	6	32055953	32106030	171	54	1.6824	0.046242
VWA1	1	1360241	1388262	77	11	1.6812	0.046361
TGFA	2	70664412	70791325	531	58	1.6799	0.046489
ACVRL1	12	52290692	52327145	157	37	1.6796	0.046521
INTS8	8	95815539	95903974	329	28	1.6793	0.04655
ARPP21	3	35670437	35845988	568	54	1.6791	0.046568
GBA	1	155194243	155224490	75	10	1.6785	0.04662
NUTM2D	10	89107425	89140452	1	1	1.6783	0.04664
CCER1	12	91289399	91358953	274	36	1.6777	0.046708
PENK	8	57339233	57369293	179	25	1.6769	0.046785
FBXO40	3	121301966	121359139	233	49	1.6767	0.046802
AMIGO2	12	47459490	47483734	74	22	1.6762	0.046847
ACVR1B	12	52335451	52400862	150	31	1.6759	0.046878
FRMD3	9	85847905	86163461	1528	110	1.6749	0.046973
PTCD3	2	86323305	86379280	198	28	1.6732	0.04714
TEX33	22	37377163	37413882	217	27	1.6723	0.047228
CABP4	11	67209877	67236699	82	13	1.6708	0.047384
OAZ2	15	64969772	65005480	88	21	1.6706	0.047404
CBLN3	14	24885738	24910160	116	28	1.6697	0.047491
DNAH17	17	76409778	76583476	1109	121	1.669	0.047562
PTPLAD2	9	20985306	21041635	232	35	1.6686	0.047594
CPXM2	10	125455723	125709783	1295	129	1.6685	0.047606
SLC35D3	6	137233402	137256777	81	13	1.6657	0.047884
KIFC2	8	145681426	145709585	80	11	1.6654	0.047916
STK17B	2	196988290	197051227	255	18	1.665	0.047956
ZNF569	19	37892057	37970177	195	34	1.6649	0.04797
FHOD1	16	67253290	67291561	75	21	1.6647	0.047987
SAP25	7	100159855	100181270	64	19	1.6637	0.048086
FAM69C	18	72092963	72135179	144	34	1.6634	0.048117
TOMM5	9	37572643	37602639	86	16	1.6629	0.048166
KIF27	9	86441613	86546342	294	21	1.6618	0.048281
NOL9	1	6571407	6624595	248	15	1.6608	0.048381
NPTX2	7	98236609	98269180	90	23	1.6606	0.048398
DOC2A	16	30006830	30044591	88	12	1.6594	0.048517
INO80D	2	206848445	206961027	353	33	1.6579	0.048669
MAPK3	16	30115426	30144827	52	17	1.6576	0.048699
MTX2	2	177124123	177212753	277	28	1.6566	0.048798
FBXO42	1	16563334	16688949	319	17	1.6566	0.048805
GPATCH2L	14	76608259	76730685	550	41	1.6565	0.048807
PPIH	1	43114096	43152429	84	18	1.6558	0.048881
ACACA	17	35431923	35776909	744	50	1.655	0.048965
C22orf29	22	19823661	19852419	102	19	1.655	0.048965
CTH	1	70866901	70915534	171	42	1.6549	0.048975
TBL1XR1	3	176727143	176925261	631	50	1.6539	0.049076
SLC5A12	11	26678566	26754974	387	67	1.6539	0.049077
ATP5C1	10	7820092	7859778	205	31	1.6533	0.049132
DYSF	2	71670852	71923898	1121	130	1.6529	0.049178
C2CD5	12	22591517	22707480	233	15	1.6522	0.049252
ZNF728	19	23148270	23195978	189	14	1.6521	0.049258
DPP9	19	4665236	4734685	185	33	1.652	0.049265
UBLCP1	5	158680089	158723044	121	31	1.6512	0.049349
SPATA19	11	133700526	133725433	119	13	1.6504	0.049429
PPM1M	3	52269841	52294613	55	13	1.6504	0.049435
OTUD3	1	20199006	20249438	181	35	1.6464	0.049839
SFI1	22	31874674	32024572	614	37	1.6458	0.049898
HLA-DQB1	6	32617244	32646160	327	16	1.6445	0.050039
CST11	20	23421040	23443494	88	16	1.6433	0.050158
VIPR1	3	42520791	42589059	257	48	1.6433	0.050163
MANBAL	20	35908041	35955663	85	15	1.6427	0.050226
CD19	16	28933260	28960667	41	12	1.6415	0.050345
CYP4F11	19	16013177	16055677	221	23	1.6414	0.050356
H3F3B	17	73762515	73791974	74	18	1.6409	0.050413
TOE1	1	45795342	45819647	72	18	1.6406	0.050439
GRB2	17	73304157	73411790	283	14	1.6406	0.050441
TUB	11	8030791	8137659	450	81	1.6401	0.050488
SRSF12	6	89795678	89837800	227	26	1.6398	0.050522
RPL22L1	3	170572664	170598272	79	21	1.6393	0.050575
PLBD1	12	14646595	14731283	279	37	1.6388	0.050624
HMBOX1	8	28737911	28932281	365	37	1.6386	0.050649
SCRIB	8	144863090	144907549	124	27	1.6383	0.050681
KLF2	19	16425628	16448685	98	20	1.6377	0.050742
CST7	20	24919866	24950564	206	18	1.6375	0.050758
SREK1IP1	5	64003971	64074512	254	22	1.637	0.050813
SLC17A6	11	22349643	22411049	224	52	1.6369	0.050825
SLC44A4	6	31820969	31856823	147	37	1.6358	0.050943
SMIM1	1	3679352	3702546	116	15	1.6354	0.050979
GCLM	1	94340761	94384966	173	28	1.6349	0.051035
CD47	3	107752145	107819872	191	38	1.6345	0.051075
OR56B3P	11	6139840	6160706	76	15	1.6345	0.051082
XRN2	20	21273942	21380463	256	20	1.6344	0.051089
DLL4	15	41211538	41241237	75	19	1.6334	0.051192
MCM9	6	119124605	119266327	628	40	1.6329	0.051241
OPALIN	10	98092973	98129092	163	25	1.6326	0.051281
ZNF667	19	56940694	56999434	195	30	1.632	0.051338
IL24	1	207060788	207087484	88	14	1.6289	0.051664
RHOU	1	228860824	228892416	123	19	1.6289	0.051667
SELPLG	12	109005686	109037735	119	40	1.6285	0.051713
TWF2	3	52252626	52283276	86	20	1.6275	0.051817
CD8B	2	87032462	87099047	142	18	1.6275	0.05182
BBS12	4	123643857	123676098	137	17	1.6274	0.051826
CRIPT	2	46833555	46862881	117	23	1.6271	0.051859
DUSP14	17	35839937	35883603	125	24	1.627	0.051869
DRD2	11	113270318	113356413	345	49	1.6259	0.051986
GDF5	20	34011145	34052568	111	16	1.6258	0.052
TMEM246	9	104225453	104305819	337	39	1.625	0.05208
SPIN2B	X	57134984	57157980	23	5	1.6247	0.052111
GABRG1	4	46027786	46136098	435	31	1.6235	0.052242
HYPK	15	44078340	44105241	54	14	1.6235	0.052243
ZNF121	19	9661029	9705209	144	5	1.6231	0.052281
TRABD2B	1	48216200	48472567	951	58	1.6226	0.052334
TEAD2	19	49833852	49875714	145	16	1.6219	0.05241
LCTL	15	66829517	66868317	172	31	1.6217	0.052435
SST	3	187376694	187398187	88	16	1.6213	0.052476
NDNF	4	121946768	122004176	204	35	1.6183	0.052799
RFX2	19	5983175	6209583	838	54	1.6182	0.052811
RAD21L1	20	1196700	1287065	302	42	1.6176	0.052874
BEST4	1	45239257	45263377	67	16	1.617	0.05294
TINAGL1	1	32032116	32063288	66	24	1.6167	0.052972
C16orf92	16	30024655	30049057	51	8	1.616	0.053043
BIRC5	17	76200267	76231717	170	24	1.6142	0.053244
TTC22	1	55235385	55276940	163	34	1.6136	0.053307
OR6B3	2	240974494	240995489	130	25	1.6129	0.053381
C11orf30	11	76145967	76274069	384	38	1.6129	0.053382
ERLIN2	8	37584117	37626619	48	31	1.6126	0.053418
RADIL	7	4826686	4933350	605	43	1.6125	0.053431
COL17A1	10	105781044	105855760	257	41	1.6119	0.053493
CHRNB2	1	154530257	154562502	81	23	1.6117	0.053515
LPHN2	1	81761845	82468120	3006	221	1.6111	0.053579
INPP5D	2	233914677	234126549	848	83	1.6108	0.053615
PCSK4	19	1471427	1500751	74	11	1.6106	0.053636
HTR5A-AS1	7	154848777	154873267	153	21	1.6104	0.053653
CORO1B	11	67195519	67221292	71	15	1.6103	0.053663
C3orf14	3	62294648	62331888	75	32	1.61	0.053702
RPSAP58	19	23935807	24020937	226	38	1.609	0.053805
FAM98B	15	38736328	38789911	231	28	1.6086	0.053855
FBXL12	19	9910943	9948492	68	14	1.6082	0.053898
NOG	17	54661060	54682951	51	13	1.6077	0.05395
GZF1	20	23332787	23363700	120	17	1.6067	0.054055
CNDP2	18	72153051	72198366	178	34	1.6061	0.054123
CLCA4	1	87002761	87056437	164	32	1.6055	0.054194
TKT	3	53248723	53300068	270	22	1.6054	0.054208
COL14A1	8	121062019	121394275	1209	97	1.6048	0.054271
C21orf37	21	18801208	18831503	160	35	1.6039	0.054371
SKI	1	2150134	2251558	344	62	1.6038	0.05438
SLC9A3R1	17	72734791	72775492	87	14	1.6035	0.054412
SMURF2	17	62528413	62668186	223	12	1.6035	0.054414
GRIK1-AS2	21	30958360	31013067	214	30	1.6031	0.054459
NOP58	2	203120439	203178389	154	21	1.6027	0.054505
WDR7	18	54308574	54708828	1738	85	1.601	0.054685
EIF2AK4	15	40216347	40337797	436	41	1.6009	0.054705
PRR21	2	240971230	240992399	128	24	1.6004	0.054754
KCTD7	7	66083868	66286446	824	28	1.6	0.054794
DVL3	3	183863176	183901398	104	22	1.5997	0.054835
CSRP2BP	20	18108762	18179031	300	45	1.5994	0.054861
EXD2	14	69648228	69719075	199	32	1.5993	0.054871
IL1RN	2	113854791	113901593	250	29	1.5991	0.054894
FLI1	11	128546430	128693162	573	83	1.5987	0.054939
PID1	2	229705242	230146001	1732	149	1.5981	0.055005
FOXN1	17	26823261	26875914	149	31	1.5978	0.055045
TIAF1	17	27390537	27428537	122	22	1.5969	0.055146
C2orf71	2	29273842	29307127	174	35	1.5962	0.055219
OR5W2	11	55671126	55692058	179	8	1.596	0.055241
PXMP2	12	133254192	133307276	188	27	1.5955	0.055296
ESAM	11	124612026	124642186	74	22	1.5946	0.055403
C2	6	31855562	31923449	270	47	1.5942	0.055448
PLEKHH2	2	43854412	44005126	731	55	1.5939	0.055476
TM9SF1	14	24648349	24692679	131	30	1.5933	0.055544
TM9SF1	14	24648363	24692679	131	30	1.5933	0.055544
ABRA	8	107761711	107792473	100	24	1.5933	0.055552
BAP1	3	52425029	52454366	69	14	1.5931	0.055568
EBF2	8	25689246	25912913	974	137	1.5929	0.05559
CRLF1	19	18673030	18728551	217	30	1.591	0.055802
PBOV1	6	138527129	138549627	93	14	1.5908	0.055832
OR5I1	11	55692932	55713876	142	6	1.5905	0.055856
HS6ST2	X	131750044	132105423	557	36	1.5897	0.055948
ZNF738	19	21531732	21572104	195	11	1.5895	0.055976
ATP6V0A4	7	138381040	138494305	530	75	1.5891	0.056017
CDC42	1	22369120	22429437	222	35	1.5887	0.05607
PDE9A	21	44063746	44205619	736	77	1.5878	0.056168
NR6A1	9	127269554	127543589	444	38	1.5878	0.056171
GSDMB	17	38050848	38086107	124	18	1.5874	0.056212
FAM110C	2	28814	56870	74	13	1.5869	0.056267
RASGRP1	15	38770304	38867776	322	45	1.5868	0.056285
GRIN3A	9	104321635	104510862	859	38	1.5865	0.056317
LIN9	1	226408850	226507570	196	35	1.5852	0.056463
TBC1D25	X	48387845	48430997	55	10	1.5844	0.056555
C15orf65	15	55690746	55720962	158	21	1.5843	0.056565
SNTN	3	63628344	63674696	241	34	1.5838	0.056615
LDLR	19	11190038	11254492	308	32	1.5838	0.056619
IFNW1	9	21130631	21152144	90	22	1.583	0.056706
TNRC6C	17	75990249	76114916	413	41	1.583	0.05671
SERP1	3	150249781	150331015	272	26	1.5829	0.056721
SPRED2	2	65527985	65669771	502	44	1.5826	0.056751
MTX3	5	79265584	79297082	79	13	1.5823	0.056795
GEMIN2	14	39573427	39616177	153	26	1.581	0.056937
ABCB1	7	87123175	87352611	650	65	1.5803	0.057014
HCN2	19	579893	627159	227	44	1.5796	0.057099
RND3	2	151314709	151405525	269	35	1.5795	0.057109
PRL	6	22277480	22307730	99	34	1.5788	0.057189
TSPAN7	X	38410623	38558169	247	42	1.5786	0.057217
LAMA2	6	129194342	129847714	2281	70	1.5781	0.057277
HTR2A	13	47395685	47481169	356	56	1.5781	0.057277
PPP1CB	2	28964506	29035806	253	26	1.5775	0.057343
ANXA2R	5	43029335	43053272	60	14	1.5775	0.057343
ZBTB17	1	16258364	16312627	134	28	1.5773	0.057359
AP5Z1	7	4805253	4843943	243	23	1.5773	0.057368
CAMKK2	12	121665497	121746111	266	41	1.5768	0.057416
CHST11	12	104839073	105165792	1509	165	1.576	0.057512
ERCC6L2	9	98627983	98786842	562	37	1.5757	0.057547
C1QTNF1-AS1	17	77005291	77033737	72	21	1.5752	0.057605
NMRAL1	16	4501681	4555764	204	18	1.5747	0.057659
IRF6	1	209949036	209989465	170	24	1.5739	0.057753
C12orf45	12	105370088	105453515	430	39	1.5723	0.057939
BCL7A	12	122447328	122509948	190	31	1.5719	0.057986
FAM57B	16	30025748	30074299	83	11	1.5708	0.058114
APOBEC3A	22	39338746	39369188	90	21	1.5705	0.05815
C12orf4	12	4586894	4657674	108	15	1.5705	0.058155
DCAF17	2	172280727	172351562	289	22	1.5702	0.058179
ARRB1	11	74965226	75072873	303	59	1.5698	0.058226
MTOR	1	11156592	11332564	435	14	1.5693	0.058284
P2RY10	X	78190829	78227451	62	21	1.5691	0.058316
CD74	5	149771200	149802492	107	36	1.5691	0.058318
ACSBG2	19	6125258	6203112	415	26	1.5688	0.058343
ERP29	12	112441120	112471255	68	11	1.5685	0.058385
ERMAP	1	43272795	43320660	130	34	1.5683	0.058401
GLYCTK	3	52311105	52339272	70	15	1.5682	0.058414
HIST1H3H	6	27767842	27788314	69	19	1.568	0.058439
GPR157	1	9150364	9199229	209	37	1.5677	0.058474
SPPL3	12	121190313	121352174	668	36	1.5674	0.058511
NXT1	20	23321373	23345414	98	18	1.5671	0.058543
TFE3	X	48876242	48911012	18	11	1.5664	0.058629
PDE4B	1	66248197	66850259	2026	124	1.5662	0.058653
TMC4	19	54653846	54686944	127	35	1.5652	0.058763
C4orf48	4	2033689	2055697	39	11	1.5629	0.059038
MROH6	8	144638357	144665141	160	28	1.5623	0.059112
MTG1	10	135197598	135244811	199	33	1.5618	0.059164
ANKRD17	4	73929093	74134515	264	46	1.5616	0.059192
CXXC5	5	139016884	139073467	135	25	1.5612	0.059239
RNF4	4	2453947	2637047	662	50	1.5609	0.059274
ANKRD18A	9	38530566	38630657	45	11	1.5607	0.059294
CNOT11	2	101859264	101896778	87	22	1.5603	0.059343
NFATC1	18	77145856	77299325	861	70	1.5603	0.059347
ADAMTS12	5	33513640	33902297	1433	113	1.5602	0.059353
PMP22	17	15123095	15178643	213	39	1.5597	0.059419
FAM228A	2	24387938	24433718	178	23	1.5596	0.059425
KLF3	4	38655817	38712663	202	45	1.5589	0.059506
DZIP1L	3	137770832	137844660	271	20	1.558	0.059619
ZNF628	19	55977699	56005854	125	32	1.5575	0.059678
CCL8	17	32636055	32658421	99	15	1.5569	0.059743
FLII	17	18138150	18172230	95	23	1.5566	0.059777
RHBDF2	17	74456973	74507872	175	44	1.5559	0.059864
IFIT2	10	91051712	91079033	116	35	1.5557	0.059894
KLHL30	2	239037363	239071588	103	27	1.5553	0.059941
CDK4	12	58131510	58159796	60	16	1.5538	0.060115
KCNQ5	6	73321520	73918574	2297	152	1.5536	0.060135
ID1	20	30183086	30204318	72	4	1.5532	0.060187
EIF2A	3	150254465	150312029	183	28	1.553	0.060216
ULK1	12	132369196	132417712	173	30	1.5516	0.060376
FAM170A	5	118955254	118981517	170	15	1.5511	0.060434
MKS1	17	56272803	56306966	72	22	1.5505	0.060507
C21orf33	21	45543487	45575605	126	14	1.5504	0.06052
GRIN2D	19	48888132	48958188	240	49	1.5503	0.060534
RPL36AL	14	50075237	50097403	97	14	1.5492	0.060666
COX4I2	20	30215691	30242809	88	10	1.5482	0.060793
C17orf78	17	35722928	35759662	84	30	1.5476	0.060863
ACCS	11	44077475	44115772	185	42	1.5475	0.060875
LINGO1	15	77895369	78123242	952	70	1.5474	0.060888
LGALS4	19	39282311	39314004	142	22	1.5469	0.060946
TNNC1	3	52475118	52498086	62	16	1.5466	0.060984
ABHD13	13	108860727	108896603	112	20	1.5465	0.060991
KCNMB3	3	178947530	178994790	252	30	1.5462	0.06103
STX17	9	102658915	102742618	199	27	1.5458	0.061079
KAT2B	3	20071515	20205896	680	47	1.5456	0.061097
NTHL1	16	2079816	2107867	67	25	1.5454	0.061124
NDUFA5	7	123167051	123208309	114	21	1.545	0.06117
OR5H1	3	97841542	97862483	138	14	1.5445	0.06123
EPHX1	1	225987794	226043260	275	49	1.5444	0.061247
DNAJB4	1	78434859	78493648	182	36	1.5438	0.061314
AKR1CL1	10	5186335	5254449	388	28	1.5438	0.061322
ATP6V1B2	8	20044878	20094330	149	35	1.5437	0.061329
ITGB8	7	20360325	20465377	464	37	1.5427	0.061454
BHLHE41	12	26262959	26288060	90	25	1.5426	0.061467
ASF1A	6	119205384	119240332	126	27	1.5421	0.061519
TMEM134	11	67221824	67246743	74	11	1.5419	0.061546
SHC1	1	154924774	154956871	43	15	1.5408	0.061682
ZNF112	19	44820708	44881377	281	27	1.5406	0.061705
BCL2L1	20	30242255	30321792	159	19	1.5403	0.061748
PRPS1L1	7	18056405	18077486	76	17	1.5403	0.061749
UNKL	16	1403206	1474752	253	31	1.5401	0.061774
JAK3	19	17925589	17968880	167	44	1.54	0.061785
HMOX2	16	4514691	4570348	214	18	1.5395	0.061838
HPD	12	122267433	122311502	127	20	1.5387	0.061937
OR8H3	11	55879849	55900787	152	7	1.538	0.062027
RBM27	5	145573113	145728814	314	21	1.5379	0.062031
ZNF287	17	16444701	16482520	102	15	1.5372	0.062124
SNRPA1	15	101811715	101845487	126	22	1.5366	0.062193
GGCT	7	30526237	30601095	285	28	1.5364	0.062224
CXorf67	X	51139767	51161687	35	9	1.5358	0.062294
LAT	16	28986147	29012104	49	12	1.5349	0.0624
NTRK2	9	87273466	87648505	1314	100	1.5342	0.062487
SETD2	3	47047919	47215457	322	25	1.5342	0.062492
SRPK1	6	35790743	35899119	342	20	1.5338	0.062542
MOSPD1	X	134011656	134059297	68	10	1.5328	0.062666
DBT	1	100642475	100725390	207	20	1.5327	0.06268
ACBD3	1	226322380	226384431	218	38	1.5319	0.062768
DLST	14	75338594	75380448	153	24	1.5319	0.062768
OR4D6	11	59214411	59235464	113	13	1.5318	0.062791
H6PD	1	9284834	9341396	256	36	1.5309	0.062899
OR5B17	11	58115597	58136542	69	9	1.5305	0.062945
INO80E	16	29996615	30027114	62	10	1.5298	0.063029
TMEM132C	12	128741948	129202460	1632	207	1.5295	0.063071
YPEL3	16	30093635	30118236	37	14	1.5275	0.063325
H2BFWT	X	103255719	103278259	55	12	1.5273	0.063341
RNF40	16	30763066	30797628	39	18	1.5271	0.063372
RHOBTB2	8	22834930	22887712	166	36	1.5265	0.063445
TACR2	10	71153659	71186623	203	23	1.5258	0.063524
NMB	15	85188360	85211794	97	25	1.5254	0.063578
IFLTD1	12	25552241	25811513	1398	101	1.525	0.063628
KCNK15	20	43364421	43389675	74	16	1.5247	0.063662
ETAA1	2	67614451	67647677	135	19	1.5231	0.063867
SCN2B	11	118022666	118057388	174	32	1.5228	0.063902
KRT73	12	52991354	53022343	167	32	1.5228	0.063902
MGAT3	22	39843349	39898199	151	34	1.5224	0.063958
C9orf85	9	74516426	74610970	200	29	1.5223	0.063968
SLC34A1	5	176796236	176835849	81	20	1.5221	0.063987
KRT39	17	39104669	39133144	138	15	1.522	0.063998
SMYD3	1	245902642	246680614	4291	144	1.522	0.06401
PARG	10	51016325	51140715	130	17	1.5219	0.064011
LCN12	9	139834003	139859949	104	18	1.5217	0.064037
C1orf74	1	209945661	209967904	74	18	1.5215	0.064066
MEX3A	1	156031804	156061789	58	21	1.5214	0.064078
RPS3	11	75100530	75143324	107	26	1.5209	0.064146
PPP3CC	8	22288332	22408652	394	26	1.5206	0.064174
HS2ST1	1	87370331	87612334	796	35	1.5206	0.064181
TMEM120B	12	122140658	122230907	298	33	1.5201	0.064243
KIAA1715	2	176778620	176877567	316	29	1.5201	0.064248
OR5B3	11	58159937	58180882	123	8	1.5196	0.06431
NEUROD1	2	182527815	182555603	71	18	1.5192	0.064358
OR8H2	11	55862519	55883457	171	7	1.5187	0.064418
ACSF3	16	89144783	89232254	603	37	1.5176	0.06456
C1QTNF1	17	77008896	77055870	157	26	1.5174	0.064585
ASCL1	12	103341464	103364294	74	24	1.5174	0.064588
MLLT1	19	6202966	6289959	389	33	1.5173	0.0646
C11orf72	11	67360351	67384177	66	12	1.5165	0.064699
ST6GAL1	3	186638274	186806341	837	104	1.5163	0.064725
TMSB15B	X	103163479	103239570	108	21	1.5155	0.064817
SDPR	2	192689028	192721981	72	24	1.5155	0.06482
PCDH9	13	66866967	67814468	3092	181	1.5145	0.064955
PLD6	17	17094309	17119629	104	26	1.5137	0.065047
ZSCAN5C	19	56703670	56730821	140	29	1.5132	0.065109
MUC3A	7	100537257	100560424	71	17	1.5132	0.065114
CXCL14	5	134896373	134924969	58	13	1.5126	0.065191
ZC2HC1C	14	75520873	75555126	82	12	1.5111	0.065386
PAPPA	9	118906083	119174601	638	101	1.5093	0.065607
TELO2	16	1533345	1570458	202	38	1.5089	0.065663
ROCK2	2	11309887	11498456	646	36	1.5085	0.065708
PANX1	11	93852094	93925138	296	37	1.5079	0.065791
ADAMTS1	21	28198066	28227728	118	29	1.5076	0.065829
PITPNM1	11	67249239	67283734	81	20	1.5076	0.065832
C8orf56	8	104135191	104163703	154	29	1.5073	0.065863
DNAJC7	17	40118451	40183394	129	27	1.5073	0.065871
KHDRBS2	6	62379865	63006132	2051	49	1.5069	0.065916
YIPF2	19	11023444	11049357	70	15	1.5065	0.065967
MGAT2	14	50077489	50100198	93	15	1.5064	0.065987
SPNS1	16	28975542	29005869	60	14	1.5055	0.066094
JPH1	8	75136935	75243563	463	57	1.5054	0.066113
C19orf52	19	11029409	11054211	60	11	1.5051	0.066151
CDS1	4	85494132	85582491	206	32	1.504	0.066289
COL28A1	7	7385834	7585484	1034	44	1.5027	0.066463
NGEF	2	233733396	233887982	754	64	1.5024	0.066497
CDK16	X	47067259	47099396	18	9	1.5019	0.066559
BPTF	17	65811640	65990494	386	19	1.5018	0.066571
AIP	11	67240512	67268574	78	16	1.5018	0.066572
YBEY	21	47696251	47727665	200	22	1.5015	0.066609
RAPGEF1	9	134442157	134625461	687	53	1.5008	0.066709
KAT8	16	31117075	31152714	71	13	1.5006	0.066725
GUCY2D	17	7895912	7933657	128	27	1.5	0.066807
H2BFM	X	103258269	103307021	104	16	1.4998	0.066832
MIEF2	17	18153848	18179866	80	19	1.4994	0.066881
CHORDC1	11	89924328	89966532	163	19	1.4993	0.066895
PSEN1	14	73593126	73700399	345	41	1.499	0.066936
CDC34	19	521714	552097	48	6	1.4988	0.066958
TXN	9	112996091	113028920	162	36	1.4983	0.067031
BRF1	14	105665623	105791926	337	19	1.4967	0.067239
ZBP1	20	56168902	56205632	72	20	1.4965	0.067257
CCDC175	14	59961257	60053549	471	30	1.4962	0.067298
IL1RAPL2	X	103800996	105021822	1848	70	1.4958	0.067351
MTPAP	10	30588730	30673377	309	29	1.4954	0.06741
CCDC144NL	17	20729760	20809453	234	29	1.4952	0.06743
ENOX1	13	43777654	44371044	1944	124	1.4946	0.06751
OR8I2	11	55850753	55871762	171	8	1.494	0.067584
ECH1	19	39296062	39332645	123	24	1.4936	0.067636
PCDH19	X	99536642	99675271	199	29	1.4932	0.067687
KIAA0408	6	127751488	127790536	101	12	1.4931	0.067708
2009-03-01	12	58138881	58164190	52	14	1.4929	0.067736
RPAIN	17	5312961	5346196	156	15	1.4928	0.067746
MSTO1	1	155569979	155728153	233	40	1.4922	0.067825
AK8	9	135590965	135764164	655	67	1.4917	0.067887
OLFML2A	9	127529437	127587164	132	35	1.4916	0.067908
WDR18	19	973174	1004569	221	26	1.4913	0.067939
IQUB	7	123082454	123185131	234	32	1.4913	0.067941
OR5F1	11	55751157	55772101	161	7	1.491	0.067982
CACNG1	17	65030706	65062909	114	26	1.4894	0.068184
MMP16	8	89034237	89350254	1040	83	1.4893	0.068208
SLC16A6	17	66253167	66297408	152	31	1.4891	0.068227
CCDC130	19	13832574	13884110	138	17	1.4877	0.06842
MYOM2	8	1983155	2123475	1477	113	1.4869	0.068519
SMARCA5	4	144424616	144488639	153	17	1.4869	0.068522
CMTR1	6	37390995	37460603	240	44	1.4863	0.068604
TRAPPC6B	14	39607015	39649736	135	23	1.4862	0.068619
BEND7	10	13470484	13580974	480	45	1.4861	0.06863
SCNN1A	12	6446009	6496896	147	43	1.4858	0.068667
PRB3	12	11408857	11432739	61	11	1.4855	0.068706
BROX	1	222875895	222918538	100	25	1.4854	0.068723
INSL3	19	17917321	17942383	115	34	1.4845	0.068843
B3GNT1	11	66102843	66125163	61	16	1.4843	0.068871
TLR9	3	52245096	52283183	94	20	1.4838	0.068932
EXT2	11	44107099	44276979	532	46	1.4833	0.069
C14orf166	14	52446193	52481420	128	38	1.4829	0.069045
NUDT18	8	21954383	21976932	84	12	1.4829	0.069054
ZNF474	5	121455208	121525312	135	33	1.4818	0.069203
SHANK1	19	51155084	51232707	188	50	1.4813	0.069262
HIST1H4L	6	27830926	27851289	101	28	1.481	0.069298
FCRL2	1	157705523	157756922	286	20	1.4808	0.069324
CKS1B	5	61798070	61818309	39	11	1.4802	0.069414
C9orf172	9	139728867	139751797	47	19	1.4799	0.069445
ZNF426	19	9628667	9659303	140	4	1.4799	0.069448
RAC3	17	79979500	80002080	70	10	1.4799	0.069453
TIAM1	21	32480734	32942290	1750	151	1.4796	0.069494
CD207	2	71047347	71072952	211	20	1.4796	0.069497
RAB11FIP2	10	119754427	119816114	151	30	1.4793	0.069535
AZI2	3	28346494	28400618	133	26	1.4791	0.069553
OR10AG1	11	55724975	55745990	180	7	1.4791	0.069554
CARD10	22	37876400	37925549	202	34	1.4787	0.069609
ARID3A	19	915781	985939	310	44	1.4786	0.069618
CANT1	17	76977799	77015949	169	34	1.4785	0.069631
FAM210B	20	54923971	54953719	107	14	1.4785	0.069636
DACT3	19	47140869	47174395	99	27	1.4779	0.06972
C2orf76	2	120049801	120134404	366	39	1.4766	0.06989
SMG7	1	183431351	183577381	367	55	1.475	0.070102
YBX1	1	43138098	43178020	95	20	1.4748	0.070129
LRCH1	13	47117303	47337175	731	59	1.4743	0.0702
SOAT1	1	179252925	179337815	460	34	1.4742	0.070214
S1PR5	19	10613623	10638607	106	27	1.4738	0.070265
PCSK5	9	78495560	78987255	2290	268	1.4737	0.070275
TAGLN3	3	111707511	111742734	225	37	1.4736	0.070292
ARL14	3	160384948	160406233	81	12	1.4734	0.070325
CYP4F12	19	15773567	15817984	372	24	1.4733	0.070338
CST4	20	23656277	23679677	116	26	1.4732	0.070343
ZNF311	6	28952562	28983093	135	33	1.4718	0.070537
PFDN1	5	139614624	139692706	214	27	1.4716	0.070559
AKAP11	13	42836289	42907396	228	34	1.4711	0.070631
PNMA3	X	152214766	152238827	35	10	1.4708	0.070673
CA12	15	63603577	63684360	318	52	1.4708	0.070679
HIRIP3	16	29993645	30017757	58	11	1.4704	0.070721
TSPAN13	7	16783160	16834161	342	48	1.4699	0.070791
MILR1	17	62451569	62474760	24	4	1.469	0.070913
UBE2I	16	1345548	1387019	238	28	1.4688	0.070945
IGF1R	15	99182200	99517759	1308	146	1.4682	0.071024
PRDM1	6	106524195	106567814	115	33	1.468	0.071046
MXRA5	X	3216606	3274682	150	14	1.4679	0.071061
TRAF3IP3	1	209919377	209965668	169	26	1.4677	0.071097
ABCB11	2	169769448	169897832	557	46	1.4672	0.071162
LANCL2	7	55423141	55511435	330	25	1.4665	0.071262
LHFPL5	6	35763070	35811651	189	24	1.4663	0.07128
WDR13	X	48438430	48473581	76	10	1.4662	0.071293
ITGAM	16	31261311	31354213	261	15	1.4658	0.071351
NAP1L2	X	72422135	72444684	46	11	1.4657	0.071372
TBC1D14	4	6900969	7044845	594	35	1.4656	0.07138
OR5M10	11	56334212	56355263	79	12	1.4653	0.071425
SEMA3G	3	52457069	52489101	61	16	1.4651	0.071443
CSNK1G1	15	64447716	64658442	632	37	1.4647	0.071499
ULBP3	6	150374286	150400231	141	21	1.4642	0.071571
CHAF1A	19	4392659	4455015	190	23	1.464	0.071596
CLTCL1	22	19156986	19289239	588	28	1.462	0.071869
COL21A1	6	55911388	56268892	1767	71	1.4617	0.07191
HOXA11	7	27211129	27234842	58	25	1.4614	0.071951
GP5	3	194105550	194129995	111	15	1.4612	0.071985
AKIRIN2	6	88374790	88421927	189	34	1.4601	0.072126
TSPO	22	43537520	43569248	142	26	1.459	0.072278
AFP	4	74286855	74331891	129	22	1.4588	0.072303
MUC4	3	195463636	195549148	281	21	1.4588	0.072308
TANC2	17	61076917	61515060	1062	49	1.4583	0.072373
CADPS2	7	121948481	122536813	1971	97	1.4578	0.07245
PSD4	2	113904902	113976973	285	50	1.4577	0.072468
PLEKHG7	12	93105281	93176231	223	33	1.4576	0.07248
NUDCD1	8	110243148	110356614	334	25	1.4572	0.072532
RIT1	1	155857599	155891195	74	13	1.4571	0.072546
CCDC85A	2	56401258	56623308	952	102	1.457	0.072558
MTERFD1	8	97241626	97283838	83	16	1.4568	0.072592
QKI	6	163825032	164009628	463	34	1.4566	0.072613
CLLU1OS	12	92803870	92831924	95	16	1.4564	0.072637
MDP1	14	24673143	24695276	63	20	1.4562	0.072667
BRAF	7	140409127	140634564	522	28	1.4561	0.07268
TMLHE	X	154709776	154909605	190	7	1.456	0.072703
AKR1C4	10	5227425	5270912	285	17	1.4555	0.072772
LINC00923	15	98275448	98427780	835	63	1.4552	0.07281
EYA2	20	45513263	45827492	1332	133	1.4549	0.072847
TRPV2	17	16308856	16350317	143	24	1.4549	0.072851
ZPBP2	17	38014417	38044149	113	12	1.4549	0.072855
OR5AS1	11	55787895	55808869	195	9	1.4542	0.072949
CD86	3	121764213	121849983	234	54	1.454	0.072974
HBM	16	193891	226767	100	20	1.4522	0.073226
RBP3	10	48371487	48400991	84	18	1.4521	0.07324
IGFN1	1	201149953	201208080	263	44	1.4519	0.073271
TPX2	20	30317074	30399608	184	21	1.4517	0.073299
MRPL49	11	64879655	64904843	68	23	1.4511	0.073371
MTRNR2L4	16	3411053	3432283	122	17	1.4505	0.07346
RTN4RL1	17	1827971	1938639	486	64	1.4501	0.07351
LRRN1	3	3831121	3899387	306	43	1.4498	0.07356
C20orf62	20	43070624	43103984	99	30	1.4494	0.073615
CKMT1B	15	43875252	43907099	32	6	1.4487	0.073717
CLEC4F	2	71025775	71057732	200	18	1.4486	0.073725
HIST1H2BO	6	27851203	27871669	90	26	1.4482	0.073777
ACSL4	X	108857473	108986632	117	17	1.447	0.073943
PRPF18	10	13618927	13682868	229	34	1.4469	0.073959
ZKSCAN3	6	28307691	28346947	199	32	1.4469	0.073966
MINPP1	10	89254632	89323217	221	39	1.4466	0.074005
FHAD1	1	15563768	15736779	650	77	1.4452	0.074194
CPAMD8	19	16993758	17147625	519	85	1.4443	0.074321
PSMD14	2	162154549	162278228	265	29	1.4443	0.074325
FLCN	17	17105526	17150502	201	31	1.4442	0.074335
HCN3	1	155237374	155269639	72	10	1.4433	0.074465
SACS	13	23892965	24017841	562	61	1.4432	0.074477
CARM1	19	10972189	11043453	163	29	1.4426	0.07457
MAP2K6	17	67400839	67549472	484	80	1.4424	0.074594
CLIP4	2	29310571	29422509	419	51	1.4417	0.074692
KIF20B	10	91451367	91544700	395	19	1.4417	0.074697
SPEN	1	16164359	16276955	305	36	1.4416	0.074706
BAZ2B	2	160165490	160483203	1140	73	1.4414	0.07474
TADA2A	17	35756965	35849835	299	25	1.4409	0.074806
PCLO	7	82373329	82802246	1515	68	1.4408	0.074819
LCE6A	1	152805344	152826459	164	12	1.4398	0.074969
FTCDNL1	2	200615267	200725896	327	51	1.4397	0.074973
ZNF620	3	40537483	40570227	73	14	1.4387	0.075122
CYBRD1	2	172368757	172424643	307	32	1.4377	0.075255
GLUD1	10	88800243	88864623	167	21	1.4375	0.075289
USP42	7	6134515	6211195	306	32	1.4366	0.075419
PFN2	3	149672691	149778575	450	37	1.4361	0.07548
COL9A3	20	61437596	61482511	237	47	1.4355	0.075577
ANKRD2	10	99322198	99353641	138	33	1.4355	0.075578
ATP12A	13	25244549	25295921	283	31	1.4344	0.075732
NOM1	7	156732417	156775876	305	22	1.4333	0.075891
PTPRF	1	43980858	44099343	417	37	1.4331	0.075909
DAGLA	11	61437905	61524473	244	40	1.4331	0.075915
TRIM51	11	55640773	55669286	143	11	1.433	0.075929
CLCNKB	1	16360272	16393803	271	25	1.4326	0.075991
CKS2	9	91916113	91941618	86	26	1.4325	0.075994
C20orf112	20	31020862	31182876	379	37	1.432	0.076068
C17orf66	17	34171955	34205895	82	12	1.4313	0.076174
SERINC4	15	44076360	44102419	53	14	1.4312	0.076189
HIST1H3J	6	27848093	27870884	98	26	1.431	0.07622
GPHA2	11	64691943	64713360	57	15	1.4309	0.076235
CDHR1	10	85944410	85989377	194	33	1.4306	0.076269
DDX39B	6	31487996	31520225	254	35	1.4304	0.076297
PBLD	10	70032417	70102806	258	17	1.4304	0.076306
HIST1H3I	6	27829623	27850099	102	27	1.4299	0.076369
ATRNL1	10	116843124	117718503	3475	56	1.4299	0.076374
MED13	17	60009966	60152643	310	34	1.4297	0.076397
RSAD1	17	48546161	48573336	102	21	1.4294	0.076448
SERPINE1	7	100760370	100792547	116	25	1.4294	0.076449
RASAL1	12	113526624	113584044	250	22	1.4282	0.076612
EDA	X	68825911	69269319	990	48	1.4282	0.076622
C1orf134	1	16545368	16566038	54	9	1.4274	0.076736
LRRC66	4	52849868	52893786	78	13	1.4266	0.076852
STX4	16	31034210	31064296	50	8	1.4262	0.076907
MYT1L	2	1782885	2345032	2401	141	1.4258	0.076964
NTF3	12	5531278	5640702	448	88	1.4254	0.077026
APMAP	20	24933561	24983615	236	24	1.4251	0.077064
C14orf177	14	99167950	99194098	152	31	1.425	0.077084
SYT10	12	33517173	33602754	370	35	1.4249	0.077093
TMEM71	8	133687253	133782958	394	28	1.4247	0.077117
TGM4	3	44906100	44966482	266	22	1.4244	0.077165
TINF2	14	24698849	24721880	42	17	1.4244	0.077169
MAGEB6	X	26200557	26223763	71	13	1.424	0.077218
HIST1H2AM	6	27850477	27870963	93	26	1.4239	0.077238
SGSM1	22	25192236	25333545	732	101	1.4237	0.077269
AVPR1B	1	206213976	206241639	134	17	1.4233	0.077328
ALKBH2	12	109515996	109541436	67	24	1.4232	0.077333
IGFBP5	2	217526828	217570248	145	19	1.4228	0.077399
CEP76	18	12651832	12712776	222	25	1.4226	0.077425
COG6	13	40219764	40375802	551	26	1.4222	0.077479
OR7A10	19	14941760	14962689	125	29	1.4217	0.077562
LILRA2	19	55074387	55109027	204	20	1.4204	0.077741
FAIM3	1	207067731	207106592	116	25	1.4197	0.077849
ASTE1	3	130722719	130756493	87	17	1.4194	0.07789
KPNA2	17	66021635	66052958	94	8	1.4189	0.077957
C2orf91	2	42152508	42191406	166	30	1.4183	0.078047
BRE	2	28102808	28571768	1494	83	1.4183	0.078059
HSF4	16	67187288	67213848	42	20	1.4178	0.078119
ARMC12	6	35694809	35726856	127	36	1.4178	0.078124
CYP27B1	12	58146117	58172769	54	12	1.4176	0.07815
ITGAE	17	3607922	3714537	433	46	1.4174	0.078185
DENND6B	22	50737459	50775489	163	23	1.4174	0.078186
TRIM39-RPP21	6	30287359	30324631	190	38	1.4173	0.078195
MBLAC1	7	99714317	99736118	54	17	1.417	0.078237
STOML2	9	35089888	35113154	68	20	1.4167	0.078287
AQP3	9	33431152	33457609	109	26	1.4162	0.078361
FPR2	19	52245279	52283779	197	44	1.4145	0.078613
RGPD3	2	107011446	107094832	11	4	1.4141	0.078662
BCKDK	16	31107428	31134110	54	10	1.4133	0.07878
CCL5	17	34188495	34217797	78	11	1.413	0.078827
TNFSF13B	13	108893588	108970832	244	61	1.4124	0.078918
OR13J1	9	35859375	35880461	76	24	1.4121	0.078963
FSD1	19	4294597	4333840	173	32	1.4121	0.078963
PTPN23	3	47412501	47464931	101	21	1.4119	0.078989
FOXM1	12	2956847	2996206	77	11	1.4118	0.079009
HPSE2	10	100208875	101005619	2979	83	1.4118	0.07901
MFSD2A	1	40410802	40445638	106	31	1.411	0.079117
ELP6	3	47527130	47565251	92	24	1.4109	0.079133
FAM35A	10	88843918	88961225	273	18	1.4103	0.079222
TPMT	6	18118542	18165305	216	33	1.4095	0.079344
TBX6	16	30087114	30113208	40	15	1.4093	0.079372
CAST	5	95850971	96125299	1271	96	1.4087	0.079465
RUNDC3B	7	87246864	87471611	476	31	1.4079	0.07958
COLEC10	8	119997691	120128821	705	34	1.4077	0.079603
RBM3	X	48422837	48447454	46	7	1.4077	0.079614
TSPAN18	11	44738015	44963972	941	110	1.4075	0.079639
VPS37A	8	17094080	17169936	339	38	1.4066	0.079773
EFNA5	5	106702590	107016596	1065	135	1.4066	0.079778
GSDMD	8	144625377	144655232	170	27	1.4047	0.080062
NPBWR1	8	53840991	53863677	128	19	1.4046	0.080068
SLC25A40	7	87452883	87515672	143	19	1.4046	0.080069
SLC24A3	20	19183290	19713581	2187	150	1.4045	0.080083
PIF1	15	65097831	65127867	146	25	1.4045	0.08009
THBS3	1	155155379	155188842	59	16	1.4038	0.080196
RGS8	1	182605239	182663711	184	31	1.4037	0.080207
HIST1H2BC	6	26105101	26134154	178	31	1.4037	0.080209
C20orf85	20	56715960	56746206	110	23	1.4036	0.080219
ACYP1	14	75509924	75546186	97	16	1.4025	0.08038
FOXO6	1	41817594	41859262	151	39	1.4004	0.080692
CUEDC1	17	55928604	56042684	334	59	1.3994	0.080854
CXorf27	X	37840070	37860569	47	14	1.399	0.080907
GKAP1	9	86344336	86454431	303	18	1.3983	0.08101
GRWD1	19	48939030	48970279	113	20	1.3981	0.081046
MSN	X	64798257	64971791	115	5	1.398	0.081057
MCU	10	74441889	74657452	379	35	1.398	0.081063
CKS1B	1	154937129	154961725	35	7	1.3976	0.08112
GHRH	20	35869489	35900238	85	21	1.3974	0.081149
PAQR3	4	79798281	79870592	235	18	1.3973	0.08116
DCUN1D4	4	52699166	52793003	145	16	1.3972	0.081172
TRPV6	7	142558956	142593507	122	11	1.3968	0.081244
TACSTD2	1	59031099	59053166	135	15	1.3967	0.081252
SLC41A3	3	125715198	125830404	552	26	1.3966	0.081271
PDE3A	12	20512179	20847315	1318	105	1.3961	0.081346
SSR2	1	155968839	156000750	81	20	1.3956	0.081423
TFEC	7	115565202	115809950	750	49	1.3953	0.081463
RSG1	1	16548195	16573657	63	10	1.3949	0.081519
MYO18A	17	27390528	27517430	390	38	1.3946	0.081569
CYP2S1	19	41688954	41723444	121	21	1.3944	0.081596
C9orf131	9	35031092	35055988	70	19	1.3939	0.081673
RAB9B	X	103067252	103097158	58	14	1.3936	0.081716
CHRNA2	8	27307279	27347400	235	45	1.3934	0.081755
ATP5S	14	50769044	50812276	197	18	1.393	0.081804
CAMP	3	48254837	48276981	55	21	1.3926	0.081871
RNF17	13	25328290	25464059	561	33	1.3911	0.082092
PLCB3	11	64008995	64046622	108	34	1.391	0.082108
KLHL18	3	47314407	47398306	140	28	1.391	0.082111
OR5M3	11	56226964	56248014	89	14	1.3895	0.082339
RBKS	2	27994231	28123965	353	26	1.3893	0.082374
TMED8	14	77791364	77853452	200	33	1.3891	0.082406
PIGO	9	35078685	35106591	82	21	1.3889	0.08243
CDRT1	17	15458797	15479590	37	7	1.3885	0.0825
PDCD7	15	65399717	65436174	91	15	1.388	0.082576
ACP5	19	11675475	11699823	94	21	1.3878	0.082601
OR5B2	11	58179738	58200786	109	7	1.3878	0.082604
C12orf74	12	93086619	93112325	91	17	1.3875	0.08265
RESP18	2	220182131	220207899	88	11	1.3874	0.082666
NUCB1	19	49393307	49436629	185	26	1.3871	0.082699
ARL4D	17	41466327	41488505	70	16	1.3864	0.082808
CLCC1	1	109462130	109516111	226	38	1.3858	0.082902
SMU1	9	33031762	33086665	200	25	1.3857	0.082913
GPAT2	2	96677694	96715199	26	7	1.3857	0.082916
CASZ1	1	10686661	10866707	523	89	1.3856	0.082929
CLIC2	X	154495500	154573966	88	4	1.3856	0.082941
NUTM2A	10	88975205	89006665	38	5	1.3854	0.082971
C19orf47	19	40815443	40864434	153	24	1.3853	0.082974
AK9	6	109804059	110022420	806	23	1.385	0.083029
PPT2	6	32111218	32144011	110	35	1.3847	0.083076
TMEM39A	3	119138347	119197677	195	24	1.384	0.083173
ERBB3	12	56463641	56507289	93	24	1.3838	0.083207
KRTAP5-5	11	1641033	1662160	182	28	1.3838	0.083209
PRRC1	5	126843301	126900781	195	18	1.3837	0.083218
KLHL36	16	84672131	84711292	191	31	1.3827	0.083381
TSC2	16	2087466	2148716	168	43	1.3822	0.08346
CCDC60	12	119762517	119988852	772	85	1.382	0.083489
DHX57	2	39014871	39113075	313	26	1.3816	0.083554
CORO2B	15	68861308	69030145	657	75	1.3813	0.08359
ASXL2	2	25946622	26111385	492	29	1.3813	0.0836
DDX5	17	62485734	62514317	58	8	1.3813	0.083601
TRIM39	6	30284256	30321506	209	39	1.3811	0.083626
CLCN7	16	1484935	1535581	380	35	1.3809	0.083661
JMJD6	17	74698919	74732866	123	20	1.3807	0.083681
SOX18	20	62669076	62690994	75	21	1.3803	0.083743
DUSP26	8	33438856	33467624	66	10	1.3802	0.083758
MB	22	35992811	36043998	216	28	1.3801	0.083781
NKTR	3	42632106	42700227	204	24	1.3794	0.083887
KIAA0195	17	73427240	73506171	255	20	1.3793	0.083907
CFB	6	31885475	31929825	168	39	1.3783	0.084054
CFB	6	31885475	31929861	168	39	1.3783	0.084054
RAD9A	11	67149176	67175881	65	16	1.3783	0.08406
PELO	5	52073774	52109880	161	20	1.3781	0.084084
RTN4R	22	20218938	20280769	84	27	1.3778	0.084127
KIAA0907	1	155872834	155914191	80	13	1.3775	0.084171
HCLS1	3	121340246	121389774	151	22	1.3773	0.084212
KLHL26	19	18737775	18791309	199	33	1.3761	0.084397
ZNF219	14	21548205	21582881	95	21	1.376	0.084417
NAPB	20	23345159	23412125	274	20	1.3759	0.084419
METTL1	12	58152254	58176576	54	13	1.3752	0.084532
PFKP	10	3098525	3189904	739	78	1.3752	0.084538
FXYD2	11	117661559	117709413	215	47	1.3751	0.084555
TAGLN2	1	159877897	159905522	87	30	1.3739	0.084735
N4BP2L1	13	32964861	33012315	132	35	1.3736	0.084779
FHIT	3	59725036	61247133	8320	447	1.3732	0.084842
UFSP2	4	186310694	186357139	152	25	1.3732	0.084851
DDX24	14	94507266	94557591	247	31	1.3731	0.084863
MROH2A	2	234674370	234752069	399	84	1.373	0.084872
METTL21B	12	58155275	58186324	72	13	1.373	0.08488
HIST1H1T	6	26097640	26118364	110	24	1.3729	0.084887
UBE2N	12	93789449	93846038	174	38	1.3729	0.084888
ANKRD30B	18	14718271	14862737	324	14	1.3728	0.084913
ABI2	2	204182942	204322446	312	43	1.3725	0.084954
CENPJ	13	25447171	25507018	263	30	1.3715	0.085114
OR5T3	11	56009676	56030698	71	10	1.3714	0.08513
HDC	15	50524144	50568223	198	29	1.3712	0.085154
F8A3	X	154676576	154698276	11	1	1.3711	0.085167
PPM1B	2	44385108	44481523	344	33	1.3709	0.085201
GP9	3	128769610	128791249	42	13	1.3706	0.085254
FAAH2	X	57303139	57525629	302	7	1.3704	0.085281
TMC8	17	76116851	76149049	170	40	1.3702	0.085318
ATG2A	11	64652007	64694722	154	25	1.3699	0.085354
SCG2	2	224451658	224477221	68	18	1.3698	0.085373
ENDOU	12	48093517	48129350	133	23	1.3696	0.0854
MAPK14	6	35985488	36089013	326	30	1.3693	0.085454
MYLK2	20	30397111	30432492	108	15	1.369	0.085499
XPNPEP1	10	111614524	111693311	200	36	1.3684	0.085592
SERF2	15	44059285	44104787	102	19	1.3678	0.085694
C14orf119	14	23553974	23579665	95	17	1.3676	0.085726
RELL1	4	37582422	37697998	492	68	1.3675	0.085741
ST3GAL5	2	86056267	86126137	265	23	1.3671	0.085792
EED	11	85945586	85999855	228	31	1.3669	0.085835
FCN2	9	137762654	137789924	198	38	1.366	0.08597
PYGO2	1	154919502	154946329	39	17	1.3656	0.086026
TAF15	17	34126459	34201619	173	16	1.3654	0.086069
POSTN	13	38126720	38182981	253	27	1.3653	0.086073
ISLR2	15	74382652	74440881	55	29	1.365	0.086125
C20orf187	20	10998408	11020014	101	10	1.3649	0.086138
CCDC77	12	488439	561811	280	40	1.3647	0.086171
CALB2	16	71382616	71434341	213	34	1.3645	0.086209
MEGF9	9	123353091	123486748	238	25	1.3633	0.086401
ZNF385C	17	40167594	40227383	136	26	1.3629	0.086452
COPS3	17	17140141	17194607	219	24	1.3627	0.086485
ICAM3	19	10434452	10460499	118	25	1.3622	0.086564
TSC1	9	135756735	135830020	235	40	1.3621	0.086584
HBZ	16	192686	214502	80	17	1.362	0.0866
GLUL	1	182340839	182371341	127	18	1.3618	0.086636
ZNF462	9	109615378	109785915	507	64	1.3612	0.086723
FAM50B	6	3839620	3861551	111	19	1.3612	0.086726
CREB3L1	11	46289212	46352972	167	40	1.36	0.086919
UGT2B28	4	70136217	70170768	20	11	1.3594	0.087004
BRMS1	11	66094804	66122596	84	19	1.359	0.087069
PDE6D	2	232587135	232660982	213	24	1.3588	0.087099
CCDC108	2	219857568	219916249	121	18	1.3584	0.087173
GSTA3	6	52751437	52784483	110	13	1.3574	0.087322
DCK	4	71848255	71906631	120	18	1.3567	0.087436
RSPH6A	19	46288968	46328577	155	25	1.3564	0.087494
ZNF726	19	24087678	24137961	171	27	1.3561	0.087542
NPIPB11	16	29382675	29425350	22	6	1.3558	0.087574
COIL	17	55005548	55048415	86	20	1.3558	0.087588
CDC7	1	91956408	92001321	159	31	1.3554	0.087652
TSEN2	3	12515931	12591122	355	22	1.3545	0.087793
TAAR8	6	132863832	132884860	127	29	1.3542	0.087839
ITGB1	10	33179247	33304720	494	49	1.354	0.087872
CBLN1	16	49301828	49325742	76	20	1.354	0.087874
MED14	X	40497558	40605110	111	12	1.3511	0.088331
SH2D6	2	85635844	85674152	154	30	1.351	0.088346
LIG4	13	108849787	108880716	99	19	1.3508	0.088375
PSMD2	3	184006497	184036842	76	21	1.3501	0.088485
MICU2	13	22056836	22188353	456	32	1.3499	0.088532
ENPP7	17	77694681	77726021	80	10	1.3497	0.088557
OGN	9	95136249	95176978	119	19	1.3491	0.088649
C17orf75	17	30641584	30687042	99	23	1.3489	0.088685
ABCD2	12	39933835	40023553	279	36	1.3486	0.088732
THNSL1	10	25295587	25325593	148	21	1.3485	0.088745
FXN	9	71640175	71725094	391	31	1.3478	0.088863
SH3D19	4	152013903	152256784	888	51	1.3474	0.088924
ATP5A1	18	43654110	43694300	197	21	1.3472	0.08895
PTGS2	1	186630923	186659559	128	16	1.3472	0.088961
OR7A17	19	14981138	15002264	132	20	1.3471	0.088968
DZANK1	20	18354011	18457925	462	47	1.3471	0.088974
FAM177B	1	222900549	222934147	85	24	1.347	0.088991
RPL18A	19	17960685	17984962	95	14	1.3458	0.089185
POLR1E	9	37475932	37513694	236	19	1.3456	0.08922
RXFP4	1	155901480	155922625	40	12	1.3455	0.089237
RAG1	11	36522259	36624706	357	37	1.3442	0.089436
GAP43	3	115332171	115450337	352	68	1.3442	0.089439
METAP1D	2	172854490	172957158	410	49	1.3436	0.089533
EFNB3	17	7598520	7624696	104	28	1.3431	0.089613
AMACR	5	33976283	34018220	123	22	1.3431	0.089614
NAGPA	16	5064845	5094142	123	27	1.3427	0.08968
NDUFAF6	8	95897995	96138683	983	55	1.3426	0.089708
RBM26	13	79875962	79990612	410	17	1.3424	0.089729
HOMER3	19	19030010	19062070	57	14	1.3411	0.089948
TRMT61B	2	29062687	29103167	148	19	1.341	0.089964
OR8K1	11	56103421	56124507	90	14	1.3409	0.089971
GABARAPL1	12	10355057	10385727	136	26	1.3408	0.089991
CHADL	22	41615517	41646938	117	21	1.3407	0.090004
NLE1	17	33445772	33479334	82	34	1.3405	0.090042
POM121C	7	75036066	75125548	57	9	1.3399	0.090134
SPIRE1	18	12436511	12668133	948	53	1.3397	0.090175
ZNF649	19	52382477	52418293	203	22	1.3396	0.090184
OR5B12	11	58196593	58217646	77	10	1.3389	0.090303
FSCB	14	44963545	44986482	155	24	1.3385	0.090373
H2AFV	7	44856390	44897682	148	25	1.338	0.090456
PAPOLB	7	4887364	4911625	123	20	1.3377	0.090492
CARKD	13	111257881	111302340	258	23	1.3377	0.090503
PUS1	12	132403745	132438406	132	24	1.3367	0.090657
PRRT1	6	32106136	32132150	98	37	1.3367	0.090664
ROPN1B	3	125677987	125712297	119	20	1.3366	0.090673
CELSR2	1	109782641	109828372	162	35	1.3365	0.090685
IGFBP2	2	217487551	217539159	138	22	1.3365	0.090685
C4orf22	4	81246874	81894910	2435	53	1.336	0.090768
HTR6	1	19981780	20016055	140	22	1.3359	0.090789
DEFB135	8	11829830	11852099	104	18	1.3348	0.090964
SLC22A17	14	23805515	23832121	89	29	1.3348	0.090974
RPS6KC1	1	213214589	213458116	456	39	1.3345	0.091016
SGCG	13	23745091	23909304	1233	82	1.3344	0.091045
RBM34	1	235284498	235334772	129	16	1.3342	0.091071
HPDL	1	45782545	45804347	49	21	1.3341	0.091085
GNG5P2	X	109579700	109600201	1	1	1.334	0.091106
TCEA2	20	62671189	62713700	138	34	1.3338	0.091129
DEFB134	8	11840692	11863821	102	17	1.3338	0.091141
SLC12A3	16	56889119	56959762	363	51	1.3326	0.091338
MB21D2	3	192504604	192645950	536	45	1.3321	0.091422
DEFB132	20	228377	251737	145	20	1.3319	0.091442
IER3IP1	18	44671413	44712745	178	24	1.3316	0.09149
SLC25A11	17	4830425	4853546	73	20	1.331	0.091599
TET2	4	106057032	106210973	545	51	1.3303	0.091703
CCDC148	2	159017593	159323265	1675	74	1.3302	0.091732
CSTL1	20	23410322	23435567	102	22	1.3301	0.091743
SLC28A1	15	85417885	85528876	609	79	1.3292	0.091894
ANKRD45	1	173568700	173649001	201	24	1.3291	0.091911
OR8J1	11	56117691	56138764	106	16	1.329	0.091918
RAB39B	X	154477526	154503874	40	4	1.3277	0.092139
MAN2A1	5	109015067	109215326	825	34	1.327	0.092253
AKAP14	X	119019800	119064679	129	31	1.3268	0.092281
NOL6	9	33451439	33483928	121	25	1.3262	0.092389
ATP13A2	1	17302453	17348423	123	20	1.3253	0.092536
HHLA3	1	70810488	70861022	143	27	1.3252	0.092555
MPST	22	37405676	37435863	126	27	1.3249	0.092597
NEDD8-MDP1	14	24673161	24711558	95	28	1.3247	0.092637
ADAM19	5	156812542	157012783	880	46	1.3246	0.092656
ADRA2A	10	112826790	112850658	68	19	1.3244	0.092689
NBL1	1	19957048	19994945	171	39	1.3243	0.092695
ZFYVE27	10	99486878	99530664	211	30	1.3231	0.092908
GFRA4	20	3629939	3654046	137	30	1.3228	0.092953
FAM181B	11	82433053	82454906	75	16	1.3224	0.09302
GALNT11	7	151712759	151829425	217	16	1.3216	0.093146
ATP13A1	19	19746007	19784502	124	27	1.3215	0.093166
C17orf97	17	250118	283510	131	27	1.3213	0.093193
LMX1B	9	129366722	129473311	457	70	1.3211	0.093237
PRSS12	4	119191193	119284158	288	34	1.3207	0.093294
HOXD4	2	177005950	177027954	50	15	1.3207	0.093307
DNAAF2	14	50081892	50111948	129	19	1.3206	0.093314
ZNF730	19	23248012	23340021	274	21	1.3206	0.093323
FLRT3	20	14293634	14328262	112	28	1.3202	0.093379
CLDN1	3	190013490	190050264	239	40	1.3202	0.093387
OGFR	20	61426187	61455352	149	32	1.3201	0.093394
CD164	6	109677717	109713762	153	21	1.3201	0.093399
SDCCAG3	9	139286377	139315061	128	21	1.32	0.093421
SFR1	10	105871816	105896143	76	11	1.3198	0.093452
HSPH1	13	31700762	31746525	139	18	1.3188	0.093612
YRDC	1	38258616	38283857	45	14	1.3184	0.093689
VCP	9	35046061	35083246	110	26	1.3177	0.093805
NT5C3A	7	33043742	33112409	308	19	1.3175	0.093844
C19orf10	19	4631386	4680382	198	27	1.3168	0.09395
STPG2	4	98095244	99074391	4367	51	1.3156	0.094152
RGS17	6	153315594	153462384	638	46	1.3154	0.094189
RNF14	5	141327893	141379856	210	22	1.3144	0.094359
OR10H4	19	16049818	16070768	122	6	1.3143	0.09437
NARG2	15	60701808	60781359	244	34	1.3138	0.094453
NRSN2	20	317426	350304	139	27	1.3131	0.094577
RNF122	8	33395273	33434643	148	17	1.3124	0.094693
LSG1	3	194351517	194403206	299	24	1.3119	0.094775
ASPN	9	95208487	95254788	137	18	1.3119	0.094783
PRPF8	17	1543923	1598176	168	18	1.3118	0.09479
KIF15	3	44793209	44924868	339	38	1.3115	0.094836
BMP2K	4	79687496	79847526	412	23	1.3106	0.09499
SLTM	15	59161244	59235852	138	26	1.3106	0.094994
RFESD	5	94972458	95030477	183	31	1.3105	0.095016
CXorf36	X	44997619	45070146	171	28	1.3102	0.095057
TSFM	12	58166372	58211854	111	20	1.3099	0.095121
USB1	16	58023450	58065522	117	22	1.3097	0.095156
BPIFA3	20	31795116	31825564	135	20	1.3096	0.095162
ZNF613	19	52420400	52462012	183	25	1.3094	0.095197
GDPD3	16	30106131	30135177	48	17	1.3094	0.095207
TAS2R9	12	10951693	10972767	70	10	1.3093	0.095209
NASP	1	46039518	46094566	200	21	1.3093	0.095223
PURB	7	44905896	44934960	68	13	1.309	0.095263
DLD	7	107521415	107582175	173	19	1.3088	0.095298
PACRG	6	163138164	163746524	2608	179	1.308	0.095444
DPY19L4	8	95721931	95816064	443	39	1.3078	0.095472
FCRL3	1	157634111	157680647	165	26	1.3077	0.095488
CHRM5	15	34250921	34367291	463	40	1.3074	0.095542
CXCR3	X	70825766	70848367	6	4	1.3068	0.095638
C19orf38	19	10937251	10990466	107	22	1.3065	0.095691
MESP2	15	90293822	90331982	221	18	1.3063	0.095725
NEK9	14	75538822	75604047	147	12	1.3062	0.095742
SLC6A4	17	28511337	28573020	164	39	1.306	0.095771
FOXK1	7	4673388	4821074	519	70	1.306	0.095778
[truncated: 16,911 more rows]

## Sheet: F1.26.GenesMAGMA.DrugExp
Figure 1-26. Results of gene-based association analyses for the GWAS of Drug Experimentation (Bonferroni results, P = 0.05/18909 = 2.64e-6, are highlighted in bold)
GENE	CHR	START	STOP	NSNPS	NPARAM	ZSTAT	P
CADM2	3	84998132	86133579	4472	94	5.1036	1.67e-07
C16orf70	16	67133861	67192442	114	32	4.8092	7.58e-07
E2F4	16	67216072	67242821	86	20	4.7511	1.01e-06
EXOC3L1	16	67208269	67234107	72	21	4.7455	1.04e-06
EEA1	12	93154413	93333107	508	34	4.7249	1.15e-06
ELMO3	16	67223014	67247932	73	16	4.6673	1.53e-06
FEZF1	7	121931448	121960745	74	23	4.6392	1.75e-06
LRRC29	16	67231042	67270951	100	21	4.5729	2.41e-06
CD34	1	208047594	208094747	208	40	4.4556	4.18e-06
ST3GAL3	1	44161495	44406831	703	39	4.415	5.05e-06
IPO13	1	44402611	44443694	81	13	4.4098	5.17e-06
NOL3	16	67194057	67219643	52	21	4.4007	5.4e-06
ZNF704	8	81530686	81797016	688	40	4.3886	5.7e-06
KIAA0895L	16	67199505	67227943	61	22	4.3854	5.79e-06
HSF4	16	67187288	67213848	42	20	4.2933	8.8e-06
B3GNT9	16	67172008	67195117	45	22	4.233	1.15e-05
CBFB	16	67053019	67144961	236	37	4.1837	1.43e-05
ARTN	1	44388992	44412913	72	12	4.1619	1.58e-05
DPH2	1	44425672	44449041	46	11	4.1519	1.65e-05
KDM4A	1	44105829	44181186	184	30	4.1197	1.9e-05
TMEM208	16	67251006	67273181	41	13	4.1061	2.01e-05
C12orf40	12	40009969	40312102	1006	46	4.0923	2.14e-05
TRADD	16	67178083	67204201	43	22	4.0211	2.9e-05
FHOD1	16	67253290	67291561	75	21	3.9721	3.56e-05
PSIP1	9	15454064	15521017	232	33	3.9621	3.71e-05
BAG5	14	104012881	104039168	58	10	3.9562	3.81e-05
FBXL8	16	67183834	67208473	35	20	3.9263	4.31e-05
SNAPC3	9	15412702	15475951	223	30	3.9216	4.4e-05
ATP6V0B	1	44430159	44453967	54	16	3.8569	5.74e-05
SLC2A13	12	40138823	40509891	1261	83	3.8466	5.99e-05
GPR26	10	125415871	125464123	252	43	3.8028	7.15e-05
ZNF292	6	87852551	87983914	517	28	3.7211	9.92e-05
ZAP70	2	98320023	98366325	140	28	3.7171	0.00010075
SLC9A5	16	67261586	67316093	104	27	3.7022	0.00010687
AGBL4	1	48988527	50499585	3741	101	3.6962	0.00010943
PPP2R2B	5	145957936	146474347	1509	98	3.6805	0.00011639
NR5A1	9	127233516	127279709	107	18	3.6701	0.00012124
RABEP2	16	28905742	28957847	77	19	3.6471	0.00013261
NUFIP2	17	27572854	27631136	159	24	3.6023	0.00015771
BACH1	21	30556392	31013071	1362	103	3.5976	0.00016059
C8orf48	8	13414352	13435796	148	30	3.5855	0.00016822
ATP2A1	16	28879726	28925830	70	11	3.5795	0.0001721
TCL1B	14	96142754	96168980	139	40	3.5687	0.00017937
REV3L	6	111610234	111814918	554	36	3.5633	0.00018308
TBC1D20	20	406124	453197	177	33	3.5366	0.00020262
EFHD1	2	233460767	233557491	286	34	3.5287	0.00020884
MYO1A	12	57412301	57454982	119	19	3.4495	0.0002808
C6orf229	6	24787549	24809117	109	31	3.4381	0.0002929
URI1	19	30404551	30516611	296	27	3.427	0.00030518
MED22	9	136195160	136224986	137	28	3.4202	0.00031292
PSD	10	104152376	104191296	80	28	3.4189	0.00031437
QKI	6	163825032	164009628	463	34	3.4116	0.00032286
KRTAP10-6	21	46001149	46022386	123	10	3.4017	0.00033489
GJB7	6	87982696	88048996	314	22	3.4011	0.00033564
SEMA3E	7	82983222	83288326	1326	63	3.4004	0.00033648
KRTAP10-8	21	46021996	46042871	97	11	3.3984	0.00033895
PIF1	15	65097831	65127867	146	25	3.3963	0.00034146
ALG13	X	110899043	111013877	39	4	3.3903	0.00034905
ARHGAP6	X	11126239	11693821	1188	48	3.3789	0.00036384
ELAVL4	1	50503686	50679458	361	59	3.3673	0.00037961
NOLC1	10	103901933	103933627	73	25	3.3524	0.00040063
CES4A	16	67012492	67053661	87	21	3.3446	0.00041208
MRPS36	5	68503587	68535956	102	12	3.3302	0.00043396
CDC42BPG	11	64580859	64622041	120	29	3.3279	0.00043747
CYP26B1	2	72346367	72385167	96	22	3.3232	0.00044489
SMIM8	6	88022301	88062043	213	22	3.32	0.00045006
RAB6B	3	133533083	133624680	378	77	3.3013	0.00048116
C6orf163	6	88044567	88085181	147	18	3.298	0.00048689
TAC3	12	57393784	57432667	98	16	3.2934	0.00049487
ACSL6	5	131132683	131357936	691	45	3.2868	0.0005066
CYP11B1	8	143943772	143971262	137	14	3.2845	0.00051073
ENOX1	13	43777654	44371044	1944	124	3.279	0.00052088
LCA10	X	153136127	153164444	53	10	3.2774	0.00052385
PPRC1	10	103882787	103920082	89	23	3.275	0.00052838
TRAF3IP2	6	111867657	111937481	272	35	3.2602	0.0005566
L1CAM	X	153116969	153184677	99	17	3.26	0.00055715
NCAM1	11	112821997	113159158	1342	79	3.2584	0.00056022
TRMT61A	14	103985521	104013410	89	16	3.2379	0.00060216
GORAB	1	170491270	170532587	86	25	3.233	0.00061247
GBE1	3	81528850	81821312	888	56	3.2294	0.0006203
DOK5	20	53082136	53277710	746	63	3.2235	0.0006331
ELOVL7	5	60037618	60150216	380	39	3.2224	0.00063563
KRTAP10-7	21	46010497	46032091	109	7	3.2183	0.00064466
TMEM194A	12	57439426	57491846	131	24	3.2183	0.00064474
EDA	X	68825911	69269319	990	48	3.2181	0.00064526
CDK7	5	68520668	68583250	205	21	3.1821	0.00073109
LHFPL3	7	103959104	104559001	2715	155	3.1792	0.00073837
B4GALT2	1	44434615	44466840	86	24	3.1689	0.00076496
FBN1	15	48690503	48948046	739	34	3.1508	0.00081408
GPR144	9	127203423	127249379	132	20	3.1405	0.00084344
COL6A1	21	47391651	47434964	209	39	3.1377	0.00085129
COL13A1	10	71551644	71734031	1011	146	3.1286	0.00087807
CHRD	3	184087861	184118524	90	29	3.1276	0.00088127
SURF6	9	136187552	136213235	118	25	3.126	0.00088586
CKB	14	103975996	103999448	73	15	3.1143	0.00092188
SLC10A1	14	70232134	70274006	155	27	3.0971	0.00097703
SMARCE1	17	38771214	38814760	91	18	3.0961	0.0009805
PTPRF	1	43980858	44099343	417	37	3.0776	0.0010434
BCLAF1	6	136568001	136620989	87	18	3.0722	0.0010626
APOPT1	14	104019299	104083860	200	21	3.0713	0.0010657
PLEKHG7	12	93105281	93176231	223	33	3.0685	0.0010756
LAPTM4B	8	98777285	98875241	505	22	3.068	0.0010773
GABPB1	15	50559389	50657605	317	21	3.0593	0.0011093
AVPR2	X	153157985	153182620	41	9	3.0529	0.0011333
FGF8	10	103519899	103545854	48	22	3.0521	0.0011362
ABCA10	17	67133355	67250987	347	27	3.0311	0.0012182
SYT1	12	79247773	79855788	1816	92	3.0305	0.0012208
DYSF	2	71670852	71923898	1121	130	3.0208	0.0012606
TBC1D29	17	28874130	28900511	71	19	3.0148	0.0012855
NFKB2	10	104143867	104172281	75	25	3.0128	0.0012941
FRAT1	10	99069022	99091672	103	13	3.0098	0.0013072
NPAS3	14	33394139	34283382	3645	336	3.0033	0.0013356
MAGEE2	X	74992823	75015079	27	7	3.0024	0.0013394
ZIK1	19	58079824	58115145	90	20	2.9937	0.0013779
ZDHHC6	10	114180058	114216672	90	28	2.9822	0.0014311
CCDC125	5	68566002	68638636	210	22	2.9806	0.0014384
TRPM2	21	45760046	45872964	418	40	2.9795	0.0014435
ELL	19	18543473	18642937	333	21	2.9551	0.0015627
FAM222A	12	110142033	110218312	253	39	2.9338	0.001674
P2RY14	3	150919905	151006255	322	38	2.9325	0.0016813
ZBTB39	12	57382618	57410230	66	15	2.9276	0.0017079
SSBP4	19	18519674	18555372	96	19	2.9132	0.0017886
FRAT2	10	99082255	99104458	74	12	2.9106	0.0018036
LRRC30	18	7221123	7242045	57	12	2.9057	0.001832
ZNF416	19	58072934	58100295	82	19	2.9027	0.0018498
LDB1	10	103857317	103890210	81	21	2.884	0.0019632
MECOM	3	168791287	169391406	2448	172	2.8828	0.0019708
GPR174	X	78416469	78437726	60	9	2.8765	0.0020108
PRKAB1	12	120095558	120129435	74	14	2.8761	0.002013
RFX4	12	106966685	107166581	624	44	2.8689	0.0020597
GAREM	18	29694840	30060447	1329	79	2.8489	0.0021933
CCNB1	5	68452837	68484072	99	11	2.845	0.0022208
DFNA5	7	24727972	24819244	399	35	2.843	0.0022347
ZKSCAN2	16	25237322	25279252	156	23	2.8418	0.0022428
NPBWR1	8	53840991	53863677	128	19	2.841	0.0022485
PCCA	13	100731269	101192686	1270	65	2.839	0.0022631
KCNK1	1	233739750	233818258	357	65	2.8384	0.002267
FBXL15	10	104168946	104192893	41	17	2.8348	0.0022926
LRRC52	1	165503244	165543198	239	31	2.8278	0.0023436
ERBB2IP	5	65212303	65388377	336	35	2.8201	0.0024005
TRPC5	X	111007543	111336004	438	55	2.8196	0.0024042
FBXW4	10	103360423	103465052	254	28	2.8144	0.0024436
IL3	5	131386222	131408897	106	27	2.8143	0.0024441
ERICH1	8	554746	698106	981	55	2.8059	0.0025087
C9orf3	9	97478983	97859441	1415	43	2.8052	0.0025141
ISYNA1	19	18535198	18559111	71	16	2.7935	0.0026067
KRT222	17	38775049	38831393	127	17	2.7935	0.0026068
OXA1L	14	23225731	23251007	117	37	2.7898	0.0026366
ACSL5	10	114123776	114198138	212	30	2.7881	0.002651
SI	3	164686686	164806283	328	20	2.7787	0.0027286
TAF9	5	68636811	68675840	73	14	2.7771	0.0027424
XK	X	37535012	37601383	42	4	2.7735	0.0027731
ADORA1	1	203049782	203146533	304	47	2.7729	0.0027776
RPL7A	9	136205069	136228281	108	24	2.7699	0.0028035
EML1	14	100194030	100418397	831	75	2.7577	0.0029107
MYH7	14	23871947	23914927	161	36	2.7549	0.0029358
CENPH	5	68475375	68516184	116	12	2.7546	0.0029383
CRYBA1	17	27563881	27591512	76	19	2.7542	0.0029421
ECI2	6	4105923	4145831	142	19	2.7509	0.0029711
MPP6	7	24602887	24743812	570	22	2.7477	0.0030011
TANC1	2	159815146	160099170	1194	82	2.7461	0.0030153
CHRNG	2	233394437	233421113	83	19	2.7459	0.0030177
KIAA1919	6	111570551	111602370	98	24	2.7449	0.0030265
ABCC3	17	48702138	48779613	242	69	2.7439	0.0030357
ACCS	11	44077475	44115772	185	42	2.7373	0.0030973
TAB3	X	30835559	31003201	361	46	2.7334	0.0031345
TNFRSF1A	12	6427923	6461280	84	19	2.732	0.0031473
H2AFY2	10	71802552	71882036	311	46	2.7302	0.0031645
ALS2	2	202555277	202655912	377	29	2.7298	0.0031683
SURF4	9	136218325	136252970	131	23	2.7294	0.0031722
EPS15	1	51809935	51995000	738	36	2.724	0.0032243
CACNA1E	1	181372238	181787219	1563	125	2.7167	0.003297
ABCA6	17	67064843	67148029	208	24	2.7163	0.0033004
PRSS54	16	58303901	58338951	210	17	2.7142	0.0033214
NCAPG2	7	158414003	158507520	377	27	2.7015	0.0034515
OR2AP1	12	55958199	55979128	117	17	2.6984	0.0034836
ETNK2	1	204090190	204131307	141	44	2.6971	0.0034976
PHTF2	7	77418122	77596818	468	33	2.6946	0.0035233
ARHGEF17	11	73009334	73090136	281	20	2.6932	0.0035382
HDAC7	12	48166505	48236915	280	50	2.6929	0.0035412
SURF1	9	136208610	136233552	107	21	2.6914	0.0035577
SURF2	9	136213428	136238045	113	20	2.6886	0.0035879
MOB1A	2	74369655	74416025	135	20	2.6865	0.0036107
PTPN12	7	77156592	77279388	382	25	2.6861	0.0036145
HTR2A	13	47395685	47481169	356	56	2.6858	0.0036181
BOLA3	2	74352525	74385121	105	21	2.6806	0.0036741
GBX2	2	237063879	237087012	57	10	2.6733	0.0037559
CLIP3	19	36495562	36534245	106	29	2.6725	0.0037649
KRT20	17	39022193	39051479	107	23	2.659	0.0039181
CGA	6	87785216	87814824	129	22	2.6588	0.0039207
AK9	6	109804059	110022420	806	23	2.6551	0.0039643
ITGAV	2	187444792	187555628	262	35	2.6524	0.0039956
LRRC3DN	21	45869814	45892078	86	15	2.6521	0.0039997
ARL13A	X	100214697	100255818	56	16	2.652	0.004001
IDE	10	94201441	94343833	480	44	2.6506	0.0040173
GPR182	12	57378230	57400468	55	13	2.6505	0.0040183
GGCT	7	30526237	30601095	285	28	2.6486	0.0040409
ATXN2L	16	28824356	28858558	68	6	2.6484	0.0040439
ANKDD1A	15	65194101	65261042	255	40	2.6455	0.0040784
ALPL	1	21825858	21914905	470	54	2.6449	0.0040857
GRAP2	22	40287086	40379725	181	50	2.6445	0.0040906
EED	11	85945586	85999855	228	31	2.6444	0.0040921
ZC3H11A	1	203754782	203833252	317	22	2.6435	0.0041031
POMK	8	42938658	42988577	119	24	2.637	0.0041819
MARK3	14	103841729	103980168	427	21	2.6361	0.0041935
HBCBP	12	57380745	57401335	55	14	2.6342	0.0042163
PTGES	9	132490610	132525326	188	34	2.6314	0.0042516
ATP5O	21	35265757	35298284	145	28	2.6261	0.0043189
SH2B1	16	28847921	28895526	82	5	2.6214	0.0043788
TWIST1	7	19050614	19167295	509	40	2.6213	0.00438
OR2M7	1	248476894	248497899	110	5	2.6196	0.0044014
ZFYVE21	14	104172067	104210005	103	28	2.6165	0.0044415
NPAT	11	108017942	108103369	227	36	2.6157	0.004452
PLEKHO2	15	65124088	65170206	178	19	2.6155	0.0044548
ABRA	8	107761711	107792473	100	24	2.6075	0.0045609
PLEKHG4	16	67301413	67333402	73	19	2.6068	0.0045698
CUX2	12	111461828	111798358	680	71	2.6062	0.0045773
UBE2U	1	64659310	64743051	341	31	2.6034	0.0046153
EVC	4	5702924	5840772	797	98	2.5991	0.0046739
GABRA2	4	46240444	46487247	804	49	2.5949	0.004731
KAT6A	8	41776997	41919508	266	24	2.5948	0.0047321
MGST3	1	165590098	165641033	324	34	2.5929	0.0047579
MYH6	14	23841199	23887486	186	46	2.5916	0.0047762
LANCL3	X	37420822	37553716	116	7	2.5915	0.0047781
TUFM	16	28843732	28867729	43	3	2.5893	0.0048088
LRRC3	21	45865369	45888739	103	15	2.585	0.0048692
ANKRD36	2	97769233	97940258	53	8	2.5843	0.0048793
HSF2BP	21	44939072	45089374	412	29	2.582	0.0049121
ADAMTS13	9	136269478	136334508	327	34	2.5649	0.0051601
RAPGEF6	5	130749614	130980929	578	37	2.5575	0.0052715
CHRND	2	233380703	233411377	104	21	2.557	0.0052792
THAP1	8	42681817	42708468	56	17	2.5532	0.0053367
OR2M4	1	248392231	248413166	56	9	2.5518	0.0053591
ANXA4	2	69861557	70063596	669	55	2.5506	0.0053766
ISPD	7	16120817	16470947	1546	69	2.5484	0.0054115
KREMEN2	16	3003945	3028384	101	19	2.5477	0.0054223
SOCS1	16	11338262	11360036	88	19	2.5445	0.0054721
MFNG	22	37855101	37892439	86	22	2.542	0.0055117
DCP1B	12	2045220	2123701	308	17	2.5414	0.0055205
ARRDC4	15	98452784	98527068	382	44	2.5404	0.0055363
CHD9	16	53078945	53373062	778	25	2.5384	0.0055673
RAP2A	13	98076476	98131382	107	25	2.5309	0.0056887
C12orf74	12	93086619	93112325	91	17	2.5287	0.0057245
KIF27	9	86441613	86546342	294	21	2.5261	0.0057662
ANAPC13	3	134186548	134215558	98	13	2.5257	0.0057729
MTTP	4	100474918	100555156	403	35	2.5239	0.0058032
CPSF2	14	92578281	92640755	271	19	2.5232	0.0058142
CSF2	5	131399483	131421859	103	30	2.5224	0.0058277
SH2D2A	1	156766035	156796654	87	17	2.5206	0.0058579
KRT39	17	39104669	39133144	138	15	2.5179	0.005903
MAST2	1	46242659	46511796	874	32	2.515	0.0059511
FURIN	15	91401822	91436688	111	22	2.5078	0.0060739
TMED7	5	114939205	114978689	147	23	2.5063	0.0060996
RPAP3	12	48047070	48109844	192	33	2.5054	0.0061149
FAHD2B	2	97739320	97770619	10	4	2.5038	0.0061426
F10	13	113767128	113813843	130	44	2.5016	0.0061816
ATM	11	108083211	108249829	476	33	2.5015	0.006183
SYT12	11	66764249	66828334	190	26	2.5006	0.0061997
LYST	1	235814341	236056940	440	32	2.4991	0.0062259
OXR1	8	107272473	107774922	1679	90	2.4943	0.0063107
OR5AN1	11	59121885	59142921	84	9	2.4939	0.0063179
NDUFB1	14	92572466	92598261	152	18	2.4934	0.0063263
NXNL2	9	91140016	91209189	206	34	2.4928	0.0063373
MICU2	13	22056836	22188353	456	32	2.4894	0.0063987
HOXB2	17	46608256	46633441	68	14	2.488	0.0064225
PIK3R3	1	46495812	46652160	440	36	2.4805	0.0065606
LCMT1	16	25113050	25199552	188	18	2.478	0.006607
RAB11FIP4	17	29708642	29875236	626	81	2.4735	0.0066892
RNASE13	14	21490979	21512944	106	35	2.4716	0.0067259
B4GALT7	5	177017101	177047348	103	18	2.4693	0.0067686
HOOK3	8	42742075	42895682	388	21	2.4677	0.0067984
RRP1B	21	45069429	45125958	183	20	2.4674	0.0068046
CYBB	X	37629264	37682714	44	3	2.4662	0.0068281
RNF170	8	42694780	42762433	132	22	2.4658	0.0068363
RHOJ	14	63660832	63769937	372	33	2.4647	0.0068558
USP7	16	8975951	9068371	300	24	2.4631	0.0068874
EIF1	17	39835137	39858920	65	9	2.4623	0.0069034
PITX3	10	103979943	104011231	76	18	2.4598	0.00695
SLC4A5	2	74433369	74580541	355	54	2.457	0.0070051
FNIP1	5	130967407	131142710	419	32	2.4559	0.0070258
PKMYT1	16	3008025	3040540	138	24	2.4558	0.0070293
NIPBL	5	36866861	37076515	405	45	2.4527	0.0070899
ELOVL3	10	103976085	103999346	57	17	2.4527	0.00709
CTSV	9	99784940	99811925	43	6	2.4517	0.0071101
AIFM2	10	71847979	71902690	245	65	2.4516	0.007111
ADCK1	14	78256426	78411355	837	60	2.4494	0.0071545
TTLL6	17	46829597	46904576	264	27	2.4481	0.0071796
GBF1	10	103995289	104152656	354	46	2.4455	0.0072324
RPL39	X	118910467	118935606	121	12	2.4382	0.0073812
COX5B	2	98252503	98274846	53	13	2.4366	0.0074134
PCBP3	21	47053608	47372368	1166	46	2.4349	0.007448
FAM65B	6	24787601	25052238	1402	117	2.4336	0.0074738
RNF180	5	63451671	63678696	562	41	2.4232	0.007692
HMGN4	6	26528633	26556482	96	15	2.4224	0.0077101
ALKBH6	19	36490022	36515141	51	17	2.4195	0.0077715
OR2T12	1	248447918	248468880	95	6	2.4177	0.0078084
TOPORS	9	32530542	32562551	83	22	2.4173	0.0078181
ZNF492	19	22807126	22860472	335	6	2.4172	0.0078206
UBR2	6	42521800	42671242	364	30	2.4163	0.0078396
CHRNA4	20	61965420	62019753	347	56	2.4161	0.0078442
CNN2	19	1016298	1049068	230	46	2.4152	0.0078626
HMGCS1	5	43279497	43323614	151	14	2.4112	0.0079492
ADSL	22	40732507	40796467	149	22	2.4097	0.0079836
GML	8	143905663	144007922	513	19	2.4087	0.0080055
ZNF550	19	58036625	58081231	128	26	2.4047	0.008092
RAB15	14	65402532	65449494	155	25	2.4046	0.0080941
GVQW1	9	32556787	32578619	65	17	2.4041	0.0081051
HEXIM1	17	43214684	43239468	64	20	2.4023	0.008146
UBAP1	9	34169003	34262521	273	26	2.4013	0.0081676
NAT16	7	100803774	100833557	107	20	2.401	0.0081762
MTUS2	13	29588748	30087892	2305	134	2.4003	0.0081914
HBP1	7	106799406	106852974	123	15	2.4	0.0081972
DRAXIN	1	11741786	11795914	181	42	2.3982	0.008238
NDUFB6	9	32542997	32583160	112	25	2.3972	0.0082595
RELT	11	73077309	73118519	137	20	2.3958	0.0082925
CDK15	2	202645184	202770273	398	67	2.3922	0.0083741
MED12L	3	150793484	151164860	1391	73	2.3921	0.0083752
FNTA	8	42879337	42950931	159	23	2.3892	0.0084427
2010-09-01	2	110290559	110381783	286	28	2.3886	0.0084559
SIAH3	13	46344405	46435871	434	61	2.3885	0.0084576
HAUS8	19	17150539	17196435	212	30	2.3884	0.0084603
SYNE4	19	36484209	36509695	61	21	2.3879	0.0084721
TOX2	20	42533504	42708256	659	88	2.3835	0.0085755
DIRC1	2	189588882	189664831	346	24	2.382	0.008609
ACTR8	3	53891093	53926229	140	21	2.3805	0.0086447
COG5	7	106832000	107214959	1007	29	2.3805	0.0086447
ADAM20	14	70979075	71011732	177	31	2.3784	0.0086933
C11orf87	11	109282846	109309840	33	14	2.3782	0.0086976
RETNLB	3	108452271	108486231	141	23	2.3728	0.0088271
CHMP4B	20	32389110	32452172	107	22	2.3723	0.0088378
TTLL13	15	90782762	90818199	143	15	2.3723	0.0088387
SLIT3	5	168078745	168738133	3105	247	2.3719	0.0088483
C2orf71	2	29273842	29307127	174	35	2.3719	0.0088491
DUS4L	7	107193929	107228906	81	16	2.3707	0.0088763
C1orf134	1	16545368	16566038	54	9	2.3696	0.0089031
EMC2	8	109445830	109509145	258	18	2.3667	0.0089727
PRDM5	4	121596074	121854025	1200	56	2.3658	0.0089965
TNFSF10	3	172213298	172251297	218	33	2.3657	0.008997
RBBP6	16	24539014	24594184	197	23	2.3623	0.0090803
IL17RB	3	53870607	53909827	172	34	2.3621	0.009086
KY	3	134311980	134380478	215	18	2.3599	0.0091403
PDGFRB	5	149483400	149545435	244	53	2.3591	0.0091594
SRSF5	14	70183617	70248722	232	41	2.3564	0.009226
BCAP29	7	107210422	107279615	155	31	2.3556	0.0092468
IFI27L2	14	94584116	94606590	74	12	2.3555	0.0092494
MED15	22	20840200	20951919	312	22	2.3553	0.009255
PTCD1	7	99004362	99073787	217	31	2.3545	0.0092732
SAP130	2	128688791	128795694	281	27	2.3537	0.0092934
IFT122	3	129148968	129249198	375	24	2.3531	0.0093077
CHEK2	22	29073731	29148410	229	42	2.3527	0.0093196
PSMD2	3	184006497	184036842	76	21	2.3498	0.0093907
CEP63	3	134194585	134303859	394	17	2.3453	0.0095068
ATP5J2-PTCD1	7	99007372	99073820	210	31	2.3452	0.0095075
HOXB9	17	46688518	46713839	102	26	2.3442	0.009533
DLX6	7	96624860	96650351	51	15	2.3397	0.0096508
PCLO	7	82373329	82802246	1515	68	2.337	0.0097186
SNX10	7	26321541	26423949	463	54	2.3366	0.0097302
RBM11	21	15578451	15610693	242	30	2.3357	0.0097524
TMEM50B	21	34794792	34862318	245	24	2.3348	0.0097758
ZNF655	7	99146029	99184076	78	21	2.3326	0.0098342
POU1F1	3	87298554	87335737	102	20	2.3317	0.009859
PLCL2	3	16834159	17142086	1120	56	2.3313	0.0098697
ABCA7	19	1030102	1075571	262	38	2.3297	0.0099108
VGF	7	100795790	100818874	90	17	2.3273	0.0099752
SLC35A1	6	88170341	88232054	273	28	2.3255	0.010023
DCDC1	11	30841916	31401357	1305	53	2.3244	0.010052
DKK1	10	54064056	54087802	63	14	2.3208	0.01015
ADD3	10	111746126	111905323	587	32	2.3205	0.010157
AP1S1	7	100787678	100814877	92	17	2.3205	0.010158
ME3	11	86142150	86393678	1338	74	2.3192	0.010192
TNP2	16	11351605	11373390	109	21	2.3189	0.010199
DSTYK	1	205101632	205190727	277	23	2.3168	0.010259
NGRN	15	90798891	90826463	84	18	2.3159	0.010282
TMEM131	2	98362799	98622388	746	37	2.3152	0.010301
ZNF772	19	57968031	57998938	163	16	2.315	0.010308
PROB1	5	138717635	138740885	33	6	2.3146	0.010316
TMEM60	7	77413045	77437897	62	15	2.3125	0.010375
EMP2	16	10612279	10684555	372	68	2.3105	0.010431
RSG1	1	16548195	16573657	63	10	2.3097	0.010454
CSK	15	75064398	75105539	146	24	2.3093	0.010464
BRINP3	1	190056792	190456759	1133	63	2.3051	0.01058
ERBB4	2	212230446	213413565	5630	252	2.3048	0.010589
RNPS1	16	2293117	2328413	75	17	2.3031	0.010636
MYLIP	6	16119356	16158479	108	28	2.3026	0.010651
PANK3	5	167965500	168016605	152	32	2.3025	0.010653
KRT222	17	38800917	38831433	64	8	2.3022	0.010661
ALDH9A1	1	165621453	165678100	339	38	2.3013	0.010688
PEBP1	12	118563663	118593389	105	26	2.3003	0.010717
ENTHD1	22	40129049	40299868	314	34	2.2985	0.010766
IFNGR2	21	34765202	34861655	327	27	2.2965	0.010824
FAM209A	20	55082243	55111198	78	17	2.2957	0.010848
KLF13	15	31609058	31737868	443	63	2.2954	0.010855
MMP7	11	102381239	102411484	139	40	2.2928	0.010928
SELK	3	53908437	53936015	97	18	2.2907	0.01099
C16orf3	16	90085316	90106309	113	15	2.2891	0.011037
CPSF4	7	99026545	99064994	113	19	2.2889	0.011042
NR6A1	9	127269554	127543589	444	38	2.2873	0.011091
FBXL16	16	732500	765829	95	17	2.2853	0.011148
TPPP2	14	21482268	21514435	131	44	2.2845	0.011172
PIPOX	17	27267531	27394234	333	71	2.2835	0.0112
PRDM14	8	70953886	70993928	128	25	2.2792	0.011327
TET3	2	74219840	74345303	334	29	2.2788	0.01134
SGK1	6	134480384	134649250	533	76	2.2786	0.011345
CA5B	X	15696953	15815747	240	32	2.278	0.011362
HORMAD2	22	30466163	30583064	324	32	2.2778	0.011371
KRTAP10-5	21	45989332	46010481	132	11	2.2751	0.011451
AIF1	6	31572961	31594798	115	29	2.273	0.011513
CYP11B2	8	143981975	144009259	166	16	2.2681	0.01166
EP300	22	41477790	41586081	316	39	2.2641	0.011783
MYCBPAP	17	48575745	48618862	175	33	2.2638	0.011792
UMPS	3	124439213	124474040	171	21	2.2613	0.011871
C14orf119	14	23553974	23579665	95	17	2.2589	0.011946
ATP5J2	7	99036098	99073954	111	19	2.2564	0.012022
LSAMP	3	115511235	117726095	8638	407	2.2564	0.012024
APLF	2	68684693	68868004	560	20	2.2559	0.012038
OR2G6	1	248674916	248695964	27	2	2.2549	0.012068
SPESP1	15	69100560	69249150	305	30	2.2548	0.012073
TMEM123	11	102257063	102351115	264	30	2.254	0.012099
CLDN24	4	184232917	184253579	75	22	2.2518	0.012167
SLC2A11	22	24188890	24238496	232	43	2.2508	0.0122
TNK2	3	195580235	195648816	238	47	2.2488	0.012261
DYNLT3	X	37686010	37716890	41	6	2.248	0.012289
GCNT7	20	55056548	55110981	171	22	2.2448	0.012389
MTHFD2	2	74415689	74454692	110	22	2.2434	0.012436
CA13	8	86122816	86206302	196	29	2.243	0.012447
VSIG10	12	118491398	118583831	359	61	2.2429	0.012452
HLA-DQB1	6	32617244	32646160	327	16	2.2402	0.012538
MGEA5	10	103534200	103588696	105	27	2.2392	0.01257
PTPRK	6	128279924	128851870	1516	88	2.2371	0.012641
CIT	12	120113595	120325095	625	50	2.236	0.012676
SYCP2L	6	10738027	10989553	1138	100	2.227	0.012973
FAM159A	1	53089016	53145355	179	36	2.2223	0.013132
WDR92	2	68340068	68394692	188	33	2.2222	0.013135
LDLRAD1	1	54464412	54493856	166	24	2.22	0.013208
C11orf65	11	108169246	108348258	592	31	2.2197	0.01322
SLC22A12	11	64348113	64379820	116	20	2.2177	0.013289
FES	15	91416925	91449006	111	23	2.2165	0.013329
JUP	17	39765692	39953183	626	47	2.2139	0.013419
SORBS1	10	97061528	97331171	1219	72	2.2133	0.013437
MAML3	4	140627907	141085338	1445	158	2.2112	0.013512
TSPYL4	6	116561151	116585261	96	22	2.2111	0.013513
DEPDC5	22	32139944	32313012	658	35	2.2096	0.013568
TTC32	2	20086404	20111747	80	21	2.2086	0.013601
KIAA1429	8	95489921	95575757	399	26	2.2069	0.01366
TSPEAR	21	45907775	46141495	1142	79	2.2067	0.013666
VRK1	14	97253641	97408059	562	43	2.2054	0.013713
CAB39L	13	49872786	50028262	640	68	2.2048	0.013733
ARHGAP19-SLIT1	10	98747795	99062413	1268	108	2.2043	0.013751
NTHL1	16	2079816	2107867	67	25	2.2039	0.013766
REXO4	9	136261186	136293164	193	16	2.2022	0.013825
NEK2	1	211826114	211858960	118	25	2.2011	0.013865
NAGS	17	42071914	42096431	79	18	2.2008	0.013874
FAM184B	4	17620929	17793135	577	35	2.2006	0.013881
KRTAP21-3	21	32080843	32101095	114	7	2.1995	0.013923
NRROS	3	196356557	196398875	123	36	2.1993	0.013929
GPR87	3	151001891	151044740	197	31	2.1989	0.013941
CST1	20	23718190	23741905	189	25	2.1984	0.013961
PTCH1	9	98195262	98289339	278	26	2.1981	0.013971
AJAP1	1	4704792	4862594	925	119	2.1965	0.014029
ITGB5	3	124470795	124630265	715	48	2.1963	0.014036
PAQR4	16	3009246	3033490	96	21	2.1955	0.014065
TKTL1	X	153514024	153568700	36	7	2.1954	0.014067
PROSER2	10	11855338	11924276	281	42	2.1953	0.014072
ZNF440	19	11915099	11956016	149	11	2.1952	0.014073
KLHL3	5	136943189	137081779	381	42	2.1934	0.014138
MTRNR2L9	6	62274008	62294534	166	14	2.1922	0.014183
ZNF649	19	52382477	52418293	203	22	2.1905	0.014245
UPF3B	X	118957985	118996961	73	13	2.1904	0.014248
GFRA4	20	3629939	3654046	137	30	2.1896	0.014278
MBD4	3	129139787	129168878	126	16	2.189	0.014298
GKAP1	9	86344336	86454431	303	18	2.1875	0.014353
AWAT2	X	69250392	69279788	50	15	2.187	0.01437
ATXN1	6	16289343	16771722	2063	245	2.1869	0.014374
ACIN1	14	23517773	23574823	168	27	2.1867	0.014383
SPATA24	5	138722252	138749777	36	8	2.1863	0.014398
UCP1	4	141470588	141499959	95	15	2.1853	0.014434
KRT34	17	39523902	39548655	77	27	2.1852	0.014437
CA7	16	66868282	66898056	77	17	2.1829	0.014523
DAB1	1	57450451	59022406	6625	353	2.1822	0.014548
RDH16	12	57335219	57363158	87	13	2.1799	0.014632
PIK3R4	3	130387779	130475673	274	15	2.1793	0.014656
CES3	16	66985140	67019051	95	24	2.1775	0.014721
CDT1	16	88859621	88885666	178	33	2.1773	0.014729
NAP1L5	4	89607066	89629386	65	15	2.1767	0.014751
TMED9	5	177009159	177033125	81	14	2.1762	0.014771
PPP1R13B	14	104190089	104323927	422	22	2.1753	0.014804
APOL4	22	36575172	36610886	239	29	2.1701	0.014999
C9orf96	9	136233117	136281220	234	18	2.1691	0.015036
HOXB1	17	46595888	46618359	82	16	2.1684	0.015064
RNASE1	14	21259387	21281437	87	26	2.1672	0.015108
TIGD1	2	233402779	233425226	75	17	2.1656	0.015171
SIX3	2	45158902	45183216	104	27	2.1648	0.015202
SCN4B	11	117994092	118033603	164	36	2.1645	0.015214
RAD17	5	68655120	68720628	133	16	2.1642	0.015225
CTIF	18	46055417	46399588	1512	189	2.1633	0.01526
TMED7-TICAM2	5	114904339	114971858	222	37	2.163	0.015272
TICAM2	5	114904339	114971876	222	37	2.163	0.015272
MZB1	5	138713169	138735770	32	6	2.1629	0.015274
ARHGAP4	X	153162821	153210452	78	17	2.1627	0.015281
AR	X	66754465	66960461	126	13	2.1605	0.015366
VTCN1	1	117676209	117763556	375	49	2.1602	0.015377
OTUD6A	X	69272341	69294029	54	13	2.1577	0.015475
ARHGAP19	10	98968996	99062413	420	30	2.1568	0.015511
LIN52	14	74541499	74677936	584	30	2.1543	0.015609
C3orf36	3	133636992	133658656	73	26	2.1528	0.015666
SUCLG1	2	84640647	84697169	180	20	2.152	0.0157
HCCS	X	11119421	11151198	17	12	2.152	0.0157
EMX2	10	119291955	119319056	115	19	2.1513	0.015725
PSMA2	7	42946460	42981822	124	13	2.1509	0.015741
TUBA1A	12	49568579	49593107	54	9	2.1509	0.015744
SLC23A1	5	138692885	138730242	56	19	2.1504	0.015762
PRCC	1	156710402	156780607	203	28	2.1494	0.015799
FBXO32	8	124500129	124563446	244	61	2.1489	0.015819
N4BP2	4	40048446	40169872	383	34	2.1487	0.015829
APRT	16	88865747	88888352	184	28	2.1455	0.015957
CXorf40B	X	149087745	149117029	13	6	2.1454	0.01596
OR2T33	1	248426073	248447138	66	5	2.1451	0.015973
TMEM89	3	48648192	48669288	47	16	2.1448	0.015983
CYP1A2	15	75031185	75058543	100	17	2.1428	0.016063
RPL22	1	6231329	6279449	145	25	2.1415	0.016117
PUS7L	12	44112410	44162620	196	23	2.1414	0.016121
GUCY2F	X	108606135	108735301	188	33	2.1389	0.016221
NMBR	6	142369467	142419936	166	21	2.1362	0.016333
OR13C3	9	107288030	107309137	77	18	2.1353	0.016369
CD84	1	160500885	160559306	236	24	2.1353	0.01637
KLC1	14	104018233	104177888	538	33	2.1353	0.01637
SP140L	2	231181899	231278447	466	41	2.1346	0.016395
FREM2	13	39251266	39470074	710	70	2.1311	0.016541
PSMA2	7	42938872	42981773	152	14	2.1294	0.016612
FAM200A	7	99133931	99166159	52	16	2.1289	0.01663
SCNN1A	12	6446009	6496896	147	43	2.1272	0.016701
DBF4	7	87495531	87548856	127	23	2.1267	0.016723
METRN	16	755115	779655	88	15	2.1254	0.016776
KIAA1324L	7	86496222	86699015	651	42	2.1236	0.016853
KIAA1324	1	109646301	109759401	458	56	2.1229	0.016881
OR5A2	11	59179416	59200449	69	12	2.1225	0.016896
SPTLC3	20	12979627	13157411	989	65	2.1217	0.01693
L3MBTL2	22	41591209	41637275	189	19	2.1213	0.016947
SH3RF3	2	109735804	110272207	1825	105	2.1205	0.016982
SPRR2G	1	153112058	153133345	99	13	2.1196	0.017022
TAC1	7	97351220	97379784	111	14	2.1192	0.017039
CCDC85A	2	56401258	56623308	952	102	2.1191	0.017042
ZNF789	7	99060464	99111273	105	26	2.1187	0.017059
EIF1AX	X	20132636	20169962	39	8	2.1174	0.017113
GMNN	6	24765159	24796327	123	38	2.1161	0.017169
OR5A1	11	59200617	59221667	96	12	2.1135	0.017277
CCDC146	7	76741751	76968850	841	42	2.1128	0.01731
TDP1	14	90411283	90521106	426	25	2.1128	0.01731
ZC2HC1A	8	79568282	79642000	222	25	2.1111	0.01738
CD247	1	167389877	167497847	435	89	2.1111	0.017383
PLEKHM3	2	208683027	208900284	544	62	2.1105	0.017408
IRAK4	12	44142747	44193346	162	24	2.1085	0.017493
HEXIM2	17	43228067	43257407	81	24	2.1085	0.017494
CARD17	11	104953196	104982158	104	14	2.1084	0.017498
KIAA0825	5	93478671	93964309	1130	131	2.1049	0.017652
SGSM3	22	40756595	40816293	159	32	2.1048	0.017652
FIG4	6	110002499	110156631	440	43	2.1016	0.017792
UPF2	10	11952021	12095169	646	32	2.1013	0.017807
LMO4	1	87784151	87824606	125	29	2.1006	0.01784
PLA2G4F	15	42423332	42458839	138	41	2.1	0.017866
ORC3	6	88289839	88387169	353	31	2.098	0.017952
ACCSL	11	44059531	44091527	134	34	2.0957	0.018054
ODF4	17	8233182	8259364	151	12	2.0951	0.01808
ACAT1	11	107982243	108028503	128	25	2.0943	0.018117
C7orf25	7	42938325	42961904	75	8	2.0928	0.018185
SLC41A1	1	205748221	205792876	176	36	2.0919	0.018223
C6orf165	6	88107730	88231352	596	41	2.0911	0.01826
BUD31	7	98996264	99027239	97	22	2.0899	0.018315
PSMB11	14	23501376	23523269	63	21	2.0898	0.018316
C6orf201	6	4069440	4141185	263	25	2.0893	0.01834
ZBED6	1	203755437	203779686	96	12	2.0888	0.018362
CUL4A	13	113852552	113929399	232	20	2.0884	0.018379
HOXB8	17	46678739	46702478	88	22	2.0885	0.018379
SLC35F1	6	118218689	118648839	1716	106	2.0881	0.018393
C11orf88	11	111375510	111417756	117	18	2.0873	0.018431
OLFML2A	9	127529437	127587164	132	35	2.0871	0.018442
MED16	19	857962	903218	192	29	2.0862	0.018481
TMEM18	2	657335	687439	119	26	2.0854	0.018514
SCG3	15	51963550	52023223	221	37	2.0846	0.018551
SHISA2	13	26608735	26635169	148	23	2.0846	0.018554
PDIA5	3	122775909	122954074	694	69	2.0822	0.018664
IL1RAP	3	190221840	190385843	581	82	2.0816	0.018688
C10orf12	10	98731041	98755582	32	11	2.0796	0.018782
ADAM23	2	207298263	207495851	601	65	2.0785	0.018833
PHYHIPL	10	60926350	61017534	274	22	2.0783	0.018839
FAM160B1	10	116571503	116669591	389	30	2.0781	0.018852
CYP2W1	7	1012835	1039276	129	24	2.0774	0.018882
ANXA13	8	124683034	124759647	335	56	2.0774	0.018884
PDZD2	5	31629517	32121037	2225	268	2.0755	0.018971
SCUBE1	22	43583289	43749394	920	126	2.0747	0.019007
UBL4B	1	110645062	110666569	104	20	2.0738	0.019047
PAPPA2	1	176422307	176824735	1156	59	2.0724	0.019115
ARMC1	8	66504694	66556442	240	20	2.0721	0.019129
KRT31	17	39539976	39563844	75	19	2.0704	0.019208
FAM168A	11	73101532	73319234	699	37	2.0692	0.019264
SLFN11	17	33667324	33710720	159	32	2.069	0.019274
CCNI	4	77958311	78007158	141	35	2.0684	0.019303
EMP3	19	48814766	48843810	117	21	2.0674	0.019348
MAP3K7CL	21	30439792	30558210	509	30	2.0673	0.019352
PLCG2	16	81762702	82001899	1795	162	2.0658	0.019423
CD19	16	28933260	28960667	41	12	2.0635	0.019534
TRPC7	5	135538999	135742730	690	48	2.0612	0.019641
IL17REL	22	50422942	50461088	149	25	2.0604	0.01968
ASPG	14	104542016	104589098	144	28	2.0599	0.019703
TCF12	15	57200821	57601479	1497	42	2.0595	0.019721
ZNF80	3	113943483	113966425	116	32	2.0581	0.019793
OR4D6	11	59214411	59235464	113	13	2.0579	0.019802
SETD7	4	140407095	140537853	415	79	2.0576	0.019814
CD300LF	17	72680452	72719117	88	20	2.0575	0.019821
ALDH6A1	14	74513553	74561196	236	26	2.0566	0.019861
TP53AIP1	11	128794626	128823040	134	38	2.0558	0.019902
RORA	15	60770483	61531518	2927	315	2.0547	0.019955
ITGAE	17	3607922	3714537	433	46	2.0541	0.019985
RBM33	7	155427145	155584179	507	17	2.0537	0.020002
FAM65A	16	67542321	67590691	121	32	2.0533	0.020022
SLK	10	105716959	105798991	325	24	2.0524	0.020066
C7	5	40899354	40993041	465	52	2.052	0.020085
CLDN22	4	184229220	184251927	83	23	2.0516	0.020104
FAM81A	15	59654892	59825748	671	73	2.0502	0.020173
IFT27	22	37144246	37182300	84	12	2.05	0.020184
ITGA3	17	48123332	48177845	173	25	2.0482	0.02027
KRT12	17	39007555	39033462	90	19	2.0461	0.020372
ULK4	3	41278090	42013922	3491	68	2.0444	0.020456
EXT2	11	44107099	44276979	532	46	2.044	0.020479
ATPAF2	17	17870723	17952523	207	21	2.0435	0.020503
MAP7D2	X	20014831	20145035	143	15	2.0435	0.020504
PHF3	6	64335725	64499229	411	45	2.0424	0.020555
KCNV1	8	110965874	110998076	81	19	2.0424	0.020555
HEBP2	6	138714668	138753334	119	20	2.0417	0.020589
GPX2	14	65395870	65419531	104	18	2.0413	0.020612
DEXI	16	11012748	11046317	126	37	2.0404	0.020653
TMEM69	1	46142886	46170115	83	11	2.04	0.020677
DNAJC18	5	138734279	138790180	78	12	2.0367	0.02084
ARHGAP25	2	68896733	69063965	813	63	2.0366	0.020845
OR2T4	1	248514883	248535929	146	9	2.0359	0.020881
LRRK1	15	101449420	101620317	789	66	2.0349	0.020932
NAB2	12	57472677	57499259	71	21	2.0347	0.020943
TRIML2	4	189002427	189040757	342	42	2.0338	0.020985
OR14C36	1	248502077	248523015	150	8	2.0323	0.021064
ECEL1	2	233334537	233362538	123	32	2.0321	0.021069
SRI	7	87824433	87866308	105	22	2.0317	0.021092
MOB3C	1	47063387	47092563	100	18	2.0311	0.021123
NOP56	20	2622791	2649039	170	24	2.0309	0.021133
MUTYH	1	45784835	45816142	84	25	2.0307	0.021145
C2orf81	2	74631304	74658718	54	15	2.0299	0.021181
SLC52A3	20	730724	759131	191	49	2.0294	0.02121
GPR22	7	107100463	107126098	52	13	2.0288	0.021239
ACTR3B	7	152446834	152562463	159	18	2.028	0.021282
SCN9A	2	167041695	167242503	869	67	2.0279	0.021285
FCGR3B	1	161582986	161611753	66	11	2.027	0.021332
C18orf8	18	21073473	21121746	163	25	2.0269	0.021338
SMNDC1	10	112040488	112074709	121	27	2.0263	0.021369
TFEB	6	41641716	41713997	267	41	2.0235	0.021513
CADPS2	7	121948481	122536813	1971	97	2.0234	0.021516
FAM107A	3	58539844	58623337	370	45	2.0209	0.021645
OPRK1	8	54128284	54174257	248	25	2.0196	0.021713
ZNF99	19	22929007	22976909	248	14	2.0194	0.021725
ARHGAP18	6	129887277	130041370	614	73	2.0191	0.021738
ZKSCAN5	7	99092274	99142323	96	26	2.0189	0.021748
KLHL38	8	124647767	124675190	154	29	2.0189	0.021748
KRT23	17	39068948	39103886	200	31	2.0187	0.021758
HIBADH	7	27555061	27712614	668	30	2.0185	0.021769
P2RY13	3	151034100	151057336	93	21	2.0177	0.02181
RCSD1	1	167589330	167685486	443	84	2.0155	0.021925
GID4	17	17932606	17981718	121	14	2.0143	0.021987
OR13C8	9	107321449	107342411	83	17	2.0108	0.022176
AKNA	9	117086436	117166685	265	38	2.0105	0.022188
SPPL3	12	121190313	121352174	668	36	2.0102	0.022204
BTNL8	5	180316077	180387906	238	14	2.0091	0.022262
SRD5A1	5	6623456	6679675	264	31	2.0091	0.022263
NOL9	1	6571407	6624595	248	15	2.0089	0.022273
TMEM74B	20	1151205	1176059	66	32	2.0085	0.022296
NPIPB7	16	28457693	28491868	7	2	2.0084	0.022302
KRTAP5-11	11	71282901	71324399	28	10	2.0081	0.022315
DNASE2	19	12976025	13002282	53	12	2.0077	0.022337
CCDC78	16	762582	786954	94	13	2.007	0.022377
CHCHD7	8	57114245	57141357	69	18	2.0067	0.022392
TMPRSS15	21	19631433	19868197	981	117	2.0051	0.022475
PGM2	4	37818255	37874558	264	22	2.0051	0.022476
ARHGEF16	1	3360990	3407677	156	16	2.0042	0.022523
GATA5	20	61028553	61061026	92	25	2.0031	0.022583
MRPL24	1	156697095	156721382	48	13	2.0021	0.022636
TOM1L2	17	17736828	17885736	452	31	2.0017	0.02266
KCNF1	2	11042063	11064350	95	26	2.0013	0.022679
CINP	14	102798956	102839253	110	30	2.0009	0.0227
EMB	5	49682026	49749082	186	20	1.9969	0.022916
FAM173A	16	760581	782601	82	13	1.9965	0.022938
NAE1	16	66826778	66917159	250	32	1.9957	0.022985
CDKN2C	1	51416417	51450305	66	20	1.9956	0.022988
PRM3	16	11357144	11377452	104	21	1.9945	0.02305
CCDC138	2	109393213	109511933	369	29	1.9939	0.023084
NIM1K	5	43182173	43290952	388	58	1.9931	0.023125
TRMT10A	4	100457866	100495189	175	21	1.9923	0.023171
SLC26A6	3	48653156	48682926	70	17	1.9915	0.023214
2008-03-01	10	45940035	46100354	656	22	1.9886	0.023375
RSBN1L	7	77315760	77422339	323	21	1.9882	0.023392
STAT5A	17	40429565	40473961	101	15	1.9866	0.023481
TAT	16	71589563	71621033	86	25	1.9831	0.023678
CHURC1-FNTB	14	65371203	65538521	665	66	1.983	0.023684
RBPJ	4	26155077	26446541	782	70	1.9802	0.02384
RBM10	X	46994268	47056212	20	8	1.98	0.023851
PCNT	21	47734036	47875682	717	41	1.9795	0.023882
2003-09-01	22	42362276	42404225	181	29	1.979	0.02391
THAP8	19	36515887	36555664	119	24	1.9785	0.023936
VN1R1	19	57956542	57977854	101	13	1.9771	0.024013
IPP	1	46149996	46226322	250	21	1.9765	0.024047
LAYN	11	111401005	111442264	108	19	1.9759	0.024085
ACTR1B	2	98262431	98290570	72	18	1.9757	0.024094
F13A1	6	6134318	6331246	901	142	1.9752	0.024121
PM20D1	1	205787150	205829260	139	36	1.9752	0.024123
RHBDD2	7	75461920	75528244	210	45	1.9731	0.024243
DOCK7	1	62910399	63163969	641	31	1.9727	0.024267
CAPN9	1	230873130	230947749	453	56	1.9722	0.024293
FNTB	14	65371203	65539368	667	65	1.9714	0.02434
DIAPH2	X	95929662	96869996	1490	63	1.971	0.024362
APOBEC3B	22	39368352	39398809	82	13	1.9693	0.024459
LAP3	4	17568815	17619595	185	12	1.9687	0.024494
SLC25A40	7	87452883	87515672	143	19	1.9685	0.024505
MED27	9	134725494	134965295	612	57	1.9681	0.02453
RGPD8	2	113117669	113202065	34	9	1.9672	0.024581
SLC7A4	22	21373007	21397129	111	24	1.9672	0.024581
ZSWIM6	5	60618100	60851997	599	46	1.9665	0.024619
KLHL26	19	18737775	18791309	199	33	1.9662	0.024638
ZNRF2	7	30313923	30462118	372	56	1.9657	0.024667
PRKCA	17	64288754	64816861	2484	153	1.9642	0.024755
TMEM98	17	31244928	31282124	146	26	1.9637	0.024783
MCM4	8	48862745	48900720	54	26	1.9637	0.024785
FAM174A	5	99861009	99932445	255	22	1.9628	0.024836
CDH8	16	61671146	62080939	1393	96	1.9627	0.02484
FGF18	5	170836660	170894627	174	35	1.9626	0.024846
OSGIN2	8	90904087	90950116	139	25	1.9611	0.024931
MEP1B	18	29755032	29810367	223	37	1.9609	0.024947
C5orf66	5	134358970	134701744	1207	166	1.9602	0.024984
AKIRIN2	6	88374790	88421927	189	34	1.9596	0.025022
C2orf61	2	47262677	47392517	703	78	1.9595	0.02503
PNPLA4	X	7856288	7905780	103	18	1.9589	0.025063
EIF2B5	3	183842826	184412546	2338	218	1.9583	0.025096
ACSF3	16	89144783	89232254	603	37	1.9578	0.025127
WWOX	16	78123310	79256564	9476	456	1.9571	0.025171
TSPAN4	11	832808	877116	153	19	1.9555	0.025261
IGFBP1	7	45917956	45943267	101	24	1.9552	0.025281
NDUFA12	12	95280831	95407546	735	59	1.9528	0.025423
SP140	2	231057826	231233762	712	60	1.9523	0.025451
NDUFB11	X	46991615	47014903	13	4	1.951	0.025528
OR2K2	9	114079763	114100800	59	15	1.9505	0.025558
ZNF620	3	40537483	40570227	73	14	1.9491	0.025643
C19orf55	19	36239044	36271930	116	21	1.9487	0.025667
LRRC48	17	17866127	17930203	169	22	1.9482	0.025695
C6	5	41132336	41271540	637	51	1.9474	0.025745
HOXB7	17	46674594	46720934	176	35	1.9471	0.025762
ATXN3	14	92514896	92582965	398	21	1.9468	0.025778
SH2D3A	19	6742171	6777599	93	13	1.9467	0.025784
MARVELD2	5	68700939	68750157	100	9	1.9456	0.025853
NRG2	5	139216364	139432884	557	73	1.9448	0.025899
MRPL9	1	151722119	151746040	76	12	1.9446	0.025914
ZFYVE20	3	15101580	15150670	172	23	1.9439	0.025953
ENDOU	12	48093517	48129350	133	23	1.9438	0.025961
CDR1	X	139855425	139876723	24	7	1.9428	0.026022
CUEDC2	10	104173002	104202418	63	22	1.9403	0.026169
C22orf24	22	32319507	32351504	127	33	1.9394	0.026223
LDLR	19	11190038	11254492	308	32	1.9392	0.026236
ZNF780B	19	40524167	40572116	145	16	1.9389	0.026257
DLX5	7	96639704	96664409	76	23	1.9385	0.026282
EFNB1	X	68038840	68071990	46	14	1.9383	0.026291
GCN1L1	12	120555007	120642513	197	29	1.9383	0.026295
CHID1	11	857357	925058	181	26	1.9373	0.026353
EMD	X	153597557	153619883	17	4	1.9365	0.026401
HPDL	1	45782545	45804347	49	21	1.9362	0.026424
ARHGAP33	19	36255434	36289724	129	22	1.9345	0.026526
SOD1	21	33021935	33051244	80	22	1.933	0.02662
SLC48A1	12	48137699	48186536	226	42	1.9319	0.026688
IRF2BP2	1	234730015	234755271	96	26	1.9305	0.026776
OR10T2	1	158358312	158379256	132	26	1.93	0.026804
PIK3R2	19	18253928	18291350	109	21	1.9296	0.026827
TMEM86B	19	55728007	55751647	109	31	1.9295	0.026837
PNMA3	X	152214766	152238827	35	10	1.9272	0.026975
TMEM59L	19	18708240	18741849	128	23	1.9268	0.027002
OR5M10	11	56334212	56355263	79	12	1.9268	0.027004
OR56A4	11	6013216	6034424	122	19	1.9265	0.02702
SELP	1	169548087	169609431	246	47	1.9262	0.02704
KRT13	17	39647233	39671957	101	29	1.9238	0.027191
OR10P1	12	56020644	56041638	95	17	1.9237	0.027194
FAM109A	12	111788455	111816925	75	17	1.9236	0.027206
RUNDC3B	7	87246864	87471611	476	31	1.9234	0.027214
PADI3	1	17565593	17620728	281	32	1.9228	0.027251
SZRD1	1	16669070	16734640	197	24	1.9209	0.027372
SCO1	17	10573654	10611692	141	17	1.9207	0.027382
RBCK1	20	378142	421610	188	43	1.9205	0.027399
OLR1	12	10300902	10334737	158	17	1.9203	0.027412
CAB39	2	231567560	231695790	332	32	1.9179	0.027565
NPC1	18	21076148	21176862	329	30	1.9174	0.027595
FLNA	X	153566892	153613006	46	5	1.9159	0.027691
MAS1L	6	29444474	29465738	128	24	1.9153	0.027728
LMBR1L	12	49480919	49514683	73	16	1.9153	0.027729
ALG14	1	95429963	95548501	449	45	1.9144	0.027782
ECI1	16	2279396	2312301	78	19	1.9136	0.027833
SLAMF7	1	160699037	160734611	120	15	1.9135	0.027842
STYX	14	53186898	53251716	165	24	1.9121	0.027932
PIH1D3	X	106439862	106497473	99	16	1.9117	0.027959
ALDH2	12	112194691	112257782	103	19	1.9101	0.028058
FOXN3	14	89581215	90095493	1797	203	1.9093	0.02811
C1orf194	1	109638573	109666479	97	23	1.9061	0.028319
PDAP1	7	98979671	99016452	104	22	1.9055	0.028357
POU3F4	X	82753269	82774775	18	9	1.904	0.028454
FAF1	1	50895150	51435935	1221	47	1.9033	0.0285
ZRANB3	2	135884486	136298806	795	19	1.9032	0.028507
PLEKHG6	12	6409602	6447672	87	19	1.9032	0.028507
PIK3R2	19	18253968	18298927	130	24	1.9032	0.028507
ANGPTL3	1	63053158	63081830	47	14	1.9023	0.028563
ATP5G1	17	46960127	46983233	69	9	1.9011	0.028643
MTMR3	22	30269144	30436855	520	37	1.8988	0.028793
OR8H1	11	56047529	56068566	79	14	1.8962	0.028969
DCLK3	3	36743913	36791352	156	41	1.8961	0.028974
RPL14	3	40488783	40513861	121	18	1.8941	0.029105
LYAR	4	4259428	4301896	235	30	1.8934	0.029151
ACAD10	12	112113857	112204903	133	21	1.8925	0.029213
CHRDL1	X	109907084	110049286	78	4	1.8914	0.029286
RAB3GAP1	2	135799835	135943964	258	17	1.89	0.02938
PSMC6	14	53163890	53205305	98	18	1.8895	0.02941
ALOX15B	17	7932335	7962452	170	35	1.888	0.029512
XPNPEP3	22	41243081	41373838	311	31	1.8875	0.029548
TAGLN2	1	159877897	159905522	87	30	1.8874	0.029555
WDR31	9	116065502	116112578	178	22	1.8872	0.02957
TNK1	17	7273853	7303093	110	25	1.8871	0.029571
SLC24A3	20	19183290	19713581	2187	150	1.8854	0.029685
GLDC	9	6522464	6655650	710	92	1.8849	0.029719
ZSWIM4	19	13896274	13953044	107	15	1.8845	0.029748
DEFB133	6	49903814	49927157	98	20	1.8841	0.029778
TEX37	2	88814169	88839102	121	16	1.884	0.02978
GPR137C	14	53009866	53114431	311	35	1.8839	0.029787
LIMA1	12	50559571	50687329	250	24	1.8833	0.029831
TAAR5	6	132899731	132920877	122	22	1.8827	0.029868
MED28	4	17606254	17645728	170	14	1.8824	0.029893
HOOK2	19	12863817	12993554	340	34	1.8822	0.029905
TCERG1L	10	132880654	133119984	1533	163	1.8819	0.029925
DDX58	9	32445300	32536322	346	39	1.8814	0.029959
SPINK14	5	147539296	147564961	179	9	1.8796	0.030083
RNASEH2A	19	12907394	12934452	112	12	1.8789	0.030128
ATP11C	X	138798505	139037435	162	7	1.8788	0.030133
P2RY12	3	151045168	151112600	284	34	1.8785	0.030153
RB1	13	48867887	49066122	649	36	1.8778	0.030207
AKR1C4	10	5227425	5270912	285	17	1.8775	0.030227
PRPH2	6	42654340	42700312	161	22	1.8774	0.030228
TSRM	7	113081127	113101457	61	16	1.8759	0.030337
SEC24C	10	75494120	75541919	78	14	1.8747	0.030419
ZNF394	7	99074142	99107947	69	23	1.8744	0.030436
CHST9	18	24485595	24775281	1179	64	1.874	0.030466
WWC2	4	184010446	184251930	697	74	1.872	0.030604
DCTN1	2	74578281	74629214	100	20	1.871	0.030673
FGL1	8	17711889	17777874	564	27	1.8709	0.030678
MB	22	35992811	36043998	216	28	1.8708	0.030684
TRPC3	4	122790182	122882909	246	48	1.8707	0.030694
EIF4G1	3	184022283	184063146	103	32	1.8705	0.030707
PGM2L1	11	74031363	74119518	340	26	1.8686	0.030836
OR10K1	1	158425272	158446344	128	21	1.8671	0.030943
ARL4D	17	41466327	41488505	70	16	1.866	0.031023
OR5AR1	11	56421138	56442163	84	18	1.8646	0.031122
MEX3B	15	82324119	82348482	89	29	1.8636	0.031189
WASL	7	123311989	123399121	293	27	1.8632	0.031215
PKN2	1	89139905	89311938	664	25	1.862	0.031299
SDHAF1	19	36476090	36497220	57	20	1.8603	0.031422
REPS2	X	16954814	17181395	207	20	1.86	0.03144
DUSP1	5	172185093	172208198	107	27	1.859	0.031514
DYRK1A	21	38728092	38899753	670	42	1.8586	0.031545
TSPAN5	4	99381518	99589780	781	93	1.8565	0.031692
CSRP2	12	77242495	77282840	141	25	1.8564	0.031701
RPS26	12	56425637	56448116	58	15	1.856	0.031726
HSPA5	9	127987132	128013609	69	17	1.8541	0.031862
ATXN2	12	111880018	112047480	349	20	1.8527	0.031962
EPHB3	3	184269572	184310197	161	28	1.8526	0.03197
DMXL2	15	51729908	51925030	598	27	1.8523	0.031988
DERL2	17	5364571	5400131	146	17	1.8521	0.032003
CNNM3	2	97471982	97509648	78	14	1.8516	0.032042
FAM71C	12	100031531	100053824	59	17	1.8516	0.032045
POLR2E	19	1076594	1105598	171	42	1.8502	0.03214
DMRTA2	1	50873222	50899172	65	15	1.85	0.032154
MRPS12	19	39411188	39433802	95	16	1.8499	0.032162
HAGHL	16	766936	795525	85	13	1.8495	0.032193
NSF	17	44658035	44844830	111	15	1.8495	0.032194
DEFB113	6	49926390	49947338	79	15	1.8494	0.032198
PRDM2	1	14016693	14161574	521	33	1.849	0.032225
TMEM14B	6	10737992	10862986	408	56	1.8484	0.032269
L1TD1	1	62650503	62688000	305	29	1.8482	0.032284
GARS	7	30624297	30683649	179	27	1.8479	0.032308
C2CD4B	15	62445734	62467482	65	19	1.8476	0.032331
HDAC2	6	114244192	114342472	303	39	1.8465	0.032408
BNIP1	5	172561445	172601390	135	24	1.8462	0.032429
IL1R1	2	102671004	102806334	609	67	1.8461	0.032442
TMEM52B	12	10313141	10354400	207	36	1.8459	0.032451
LSP1	11	1864200	1923497	245	43	1.8459	0.032452
ZFAT	8	135480031	135735292	1149	72	1.8452	0.032503
EFCAB4A	11	816144	841991	127	16	1.8451	0.032514
CCT2	12	69969114	70005350	155	26	1.8437	0.032617
TBC1D8	2	101614079	101879328	942	66	1.8435	0.032631
HRASLS2	11	63310242	63340855	66	19	1.8426	0.032692
RARS2	6	88214096	88309721	442	30	1.8424	0.032705
LTBR	12	6474211	6510733	86	23	1.8422	0.032721
SCAF4	21	33033346	33114388	217	30	1.8416	0.032764
UNC5B	10	72962327	73072621	494	81	1.8409	0.032818
LCOR	10	98582017	98750800	306	29	1.8408	0.032827
KCNK9	8	140603081	140725299	511	72	1.8404	0.032853
SPRR1B	1	152993678	153015376	134	5	1.8403	0.03286
C17orf102	17	32891142	32916388	109	24	1.8398	0.032896
WASF1	6	110411022	110511207	294	16	1.8363	0.033159
TENM4	11	78353876	79161992	3154	277	1.8357	0.033198
KCTD5	16	2722476	2769031	102	23	1.8355	0.033213
SHQ1	3	72788428	72921065	294	19	1.8353	0.033232
OR51E1	11	4654650	4686718	258	30	1.8345	0.033288
CUEDC1	17	55928604	56042684	334	59	1.8335	0.033363
POMGNT2	3	43110724	43157568	151	32	1.8328	0.033417
IRX2	5	2735959	2762969	88	22	1.8323	0.033453
EIF3D	22	36896897	36935483	233	36	1.8323	0.033453
FAM178B	2	97531620	97694175	407	35	1.8321	0.033468
KIAA0947	5	5410777	5500347	261	28	1.8319	0.033487
DUSP10	1	221864766	221925518	218	52	1.8277	0.033797
NQO1	16	69730899	69770854	118	23	1.827	0.033852
HSPG2	1	22138738	22273790	540	53	1.8266	0.033881
NASP	1	46039518	46094566	200	21	1.825	0.033999
C21orf2	21	45738827	45769285	112	31	1.8245	0.034039
IL23A	12	56722663	56744193	41	7	1.8241	0.034071
GRIK1	21	30899254	31322351	1628	92	1.8239	0.034084
SLC35F4	14	58020640	58458912	2310	113	1.8234	0.034118
RPL10L	14	47110222	47131028	62	17	1.8234	0.034121
TOE1	1	45795342	45819647	72	18	1.8219	0.034237
OR5T1	11	56033029	56054146	70	12	1.8218	0.034243
LPAR6	13	48953707	49028840	230	35	1.8205	0.034345
SPNS1	16	28975542	29005869	60	14	1.8201	0.034371
TCF20	22	42546019	42749622	724	73	1.8185	0.034494
OSTM1	6	108352613	108497058	415	58	1.8184	0.034505
SLC16A11	17	6934949	6957242	92	17	1.8175	0.034567
AKR1A1	1	46006215	46045721	147	22	1.8172	0.034595
IL17RA	22	17555844	17606583	180	48	1.8167	0.034628
FGD5	3	14850469	14985895	713	59	1.8155	0.034721
KRT38	17	39582698	39607173	138	18	1.8152	0.034749
DEFB114	6	49917962	49941818	90	18	1.8145	0.034798
DCSTAMP	8	105341315	105378917	187	37	1.814	0.034839
RFPL1	22	29824572	29848444	115	24	1.8123	0.034969
MIS12	17	5379605	5404134	120	14	1.8115	0.035033
CDH18	5	19463060	20585982	4341	153	1.8112	0.035055
MRPL50	9	104139915	104170896	106	27	1.8111	0.035062
CCDC24	1	44447031	44472200	79	22	1.8096	0.03518
ZNF367	9	99138223	99190611	156	13	1.8056	0.035487
HFM1	1	91716323	91880426	439	37	1.8055	0.0355
RHPN2	19	33459499	33565794	438	49	1.8051	0.03553
CELSR3	3	48663902	48710348	89	16	1.8043	0.035593
SLC25A32	8	104400863	104437417	158	20	1.8041	0.03561
LRRFIP2	3	37084117	37235180	469	32	1.8037	0.03564
RASL10B	17	34048668	34080540	100	26	1.8035	0.035653
ERBB3	12	56463641	56507289	93	24	1.8024	0.035742
OR5M1	11	56370031	56390978	70	15	1.8019	0.035782
OR5M3	11	56226964	56248014	89	14	1.7993	0.035985
GPBP1L1	1	46082976	46163785	277	17	1.7988	0.036022
COL24A1	1	86184916	86632626	1961	83	1.7983	0.036063
PKD1L1	7	47804250	47998088	893	79	1.7968	0.036184
PLEKHS1	10	115501213	115553188	232	25	1.7968	0.036187
PAN2	12	56700007	56737837	63	10	1.7956	0.03628
EHD4	15	42180950	42274776	356	46	1.7954	0.036292
MYCN	2	16070686	16097129	84	17	1.795	0.03633
TM2D3	15	102151847	102202594	173	25	1.794	0.036404
RNF135	17	29285803	29336929	106	11	1.7935	0.03645
MED14	X	40497558	40605110	111	12	1.793	0.036488
ACOT12	5	80615824	80699998	311	46	1.7928	0.036503
PRR9	1	153180060	153201793	84	8	1.7928	0.036504
HDGF	1	156701899	156746717	106	22	1.7913	0.036621
NDST2	10	75551669	75581589	41	7	1.7913	0.036625
MLH1	3	37024823	37117380	291	24	1.7896	0.03676
MBIP	14	36757770	36799882	103	12	1.7893	0.036784
TMEM200C	18	5872071	5905954	117	35	1.7881	0.036879
ZNF439	19	11949541	12004565	212	31	1.7881	0.036882
BEX4	X	102460020	102482174	53	10	1.7877	0.036916
SPRR2D	1	153002201	153024407	139	6	1.7871	0.036963
STAT2	12	56725381	56763939	68	12	1.7867	0.036994
NMS	2	101076944	101109742	254	15	1.786	0.037047
CD151	11	822843	849831	128	14	1.7853	0.037103
OR13C4	9	107278534	107299490	93	18	1.7848	0.037146
WDR62	19	36535783	36606008	229	35	1.7848	0.037147
OR8I2	11	55850753	55871762	171	8	1.7843	0.037184
CRMP1	4	5739811	5904785	861	116	1.7834	0.037261
RANBP2	2	109325937	109412267	243	25	1.7822	0.037359
IGIP	5	139495521	139518391	43	20	1.7814	0.037423
BTF3	5	72784233	72811460	118	12	1.7814	0.037424
CTSA	20	44508783	44537459	108	30	1.7807	0.037477
CTNNA2	2	79402357	80885905	6439	356	1.78	0.037537
PTTG1	5	159838829	159865748	104	25	1.7799	0.037544
SHB	9	37909131	38079210	649	41	1.7797	0.037566
SPRTN	1	231462850	231500769	118	14	1.7791	0.03761
IRF9	14	24620262	24645774	77	24	1.7786	0.037653
CS	12	56655483	56704176	97	11	1.7767	0.037806
TCTA	3	49439639	49463908	72	16	1.7753	0.037924
COQ10A	12	56650642	56674750	37	8	1.775	0.037946
CLDN3	7	73173328	73194600	56	13	1.7746	0.037985
ELFN1	7	1717755	1797590	254	34	1.7745	0.037988
AIMP1	4	107226701	107280383	165	22	1.7744	0.038
OR13C5	9	107350650	107371788	165	13	1.7739	0.038038
CNPY2	12	56693626	56720120	54	10	1.7738	0.038047
EPO	7	100308423	100331323	72	16	1.7737	0.038054
BRAP	12	112069950	112133790	96	24	1.7736	0.038062
TUBA1B	12	49511565	49535180	55	7	1.7724	0.038161
RHBDD3	22	29645841	29674198	77	26	1.7714	0.038247
F7	13	113750105	113784995	123	26	1.7713	0.038256
OR5T2	11	55989490	56010737	75	10	1.7713	0.038258
ELMOD2	4	141435312	141484924	100	15	1.7699	0.038371
KRTAP21-2	21	32109112	32129551	65	4	1.7697	0.03839
GNG4	1	235700987	235824054	484	57	1.7691	0.038441
FAM78A	9	134123463	134161934	91	21	1.7684	0.038497
UBA1	X	47040260	47084527	29	13	1.7682	0.038516
FRMD4B	3	69209141	69601734	1814	131	1.7676	0.038564
PSMC4	19	40466912	40497348	115	17	1.7673	0.038586
SH2B3	12	111833752	111899427	137	20	1.767	0.038614
GRIK4	11	120372468	120869613	1836	187	1.7659	0.038704
KRT28	17	38938455	38966211	102	27	1.7656	0.038735
ZNF516	18	74059644	74217146	556	61	1.7655	0.03874
TMEM256-PLSCR3	17	7283046	7317416	111	27	1.7643	0.038838
C17orf61-PLSCR3	17	7283053	7317416	111	27	1.7643	0.038838
LAT	16	28986147	29012104	49	12	1.7639	0.038871
SBNO2	19	1097636	1184282	378	43	1.763	0.038948
CTSE	1	206307459	206342104	37	6	1.7618	0.039051
ANTXRL	10	47647581	47711443	184	24	1.7614	0.039085
FARS2	6	5251277	5781813	2257	202	1.7613	0.039095
LNPEP	5	96261098	96383219	469	33	1.7609	0.039131
CHURC1	14	65371079	65421309	233	21	1.7606	0.039154
EML3	11	62359690	62390237	65	13	1.7595	0.039246
RADIL	7	4826686	4933350	605	43	1.7593	0.039262
ALG1	16	5073703	5147380	299	56	1.7592	0.039268
PRM2	16	11359496	11380337	114	22	1.7589	0.039299
TRIM6	11	5607339	5644188	261	53	1.7581	0.039362
TNFRSF10C	8	22931868	22984950	179	33	1.7579	0.039384
ACOT13	6	24657263	24715293	287	41	1.7576	0.039409
COIL	17	55005548	55048415	86	20	1.7572	0.039441
CLN3	16	28467974	28513333	30	3	1.7571	0.039453
GNB5	15	52403117	52493566	380	39	1.7569	0.039468
REM2	14	23342374	23366895	60	17	1.7559	0.039554
GJC3	7	99510892	99537243	88	20	1.7555	0.039586
SLC6A9	1	44447172	44507139	181	47	1.7554	0.039596
CARD18	11	104998448	105020453	111	9	1.7539	0.039726
MOGAT3	7	100828288	100854302	84	24	1.7537	0.039742
PLTP	20	44517399	44550794	126	36	1.7529	0.039806
TEX38	1	47124527	47149266	91	14	1.7529	0.039808
GPHN	14	66964125	67658520	2755	28	1.7524	0.039854
TMCC2	1	205187304	205252471	257	24	1.7519	0.039895
SREBF1	17	17703713	17750325	127	20	1.7513	0.039946
GAS8	16	90076037	90121383	238	32	1.7513	0.03995
CD70	19	6573194	6614114	169	33	1.7512	0.039958
POLR2L	11	827356	852545	121	13	1.7498	0.040073
NPM3	10	103531082	103553170	35	19	1.7498	0.04008
KCNH5	14	63163287	63578755	1522	98	1.7494	0.04011
BTN1A1	6	26491449	26520650	112	26	1.7481	0.040227
C10orf76	10	103595356	103825950	492	59	1.7479	0.040244
KRTAP10-4	21	45983606	46004987	124	13	1.7475	0.040276
PPP1R3A	7	113506832	113725975	658	37	1.7464	0.040372
PWP1	12	108069509	108116944	174	30	1.7457	0.040435
IL33	9	6205805	6267983	248	39	1.7455	0.040446
OR56A3	11	5958570	5979591	81	19	1.7453	0.040462
GP5	3	194105550	194129995	111	15	1.7446	0.040529
RAB28	4	13352978	13495989	534	18	1.7443	0.040553
SNRK	3	43318004	43476256	339	50	1.7439	0.040589
KRT24	17	38844243	38870002	95	15	1.7432	0.040648
TECTB	10	114033493	114074793	161	30	1.7429	0.040672
SLC6A3	5	1382909	1455545	314	56	1.7429	0.040673
C4orf32	4	113056553	113126412	188	29	1.7428	0.040683
ACE	17	61552184	61609209	210	36	1.7419	0.040767
C15orf59	15	74022141	74055088	129	28	1.7404	0.040891
TEAD2	19	49833852	49875714	145	16	1.7401	0.040918
MC2R	18	13872043	13925706	269	27	1.7377	0.041133
RAB5B	12	56357697	56398490	98	20	1.7371	0.041187
NARFL	16	769753	801329	95	18	1.7344	0.041427
ERAP2	5	96201643	96265420	382	25	1.7342	0.041441
GMCL1	2	70046774	70118528	164	20	1.7337	0.041488
PRSS56	2	233375173	233400422	88	20	1.7335	0.0415
COQ6	14	74406629	74440373	147	21	1.7326	0.041583
OR2M3	1	248356332	248377392	84	9	1.7321	0.041627
ABCA3	16	2315882	2400747	204	33	1.7319	0.041644
SVIL	10	29736267	30035710	1631	123	1.7313	0.0417
MRPL48	11	73488361	73586178	397	30	1.7313	0.041701
PXDNL	8	52222138	52732005	2411	84	1.7313	0.041703
CCDC36	3	49225861	49305537	147	25	1.7294	0.041873
GOSR1	17	28794380	28864610	157	23	1.7291	0.041892
EXOC8	1	231458480	231483598	70	12	1.7287	0.041935
C5orf28	5	43434354	43493995	222	26	1.728	0.041998
LARS	5	145482601	145572223	361	9	1.7264	0.042141
SLITRK3	3	164894508	164924897	106	23	1.7253	0.042241
PAGE4	X	49583863	49608576	20	3	1.7249	0.042273
CCDC176	14	74476056	74559566	407	30	1.7243	0.042328
CHD5	1	6151853	6250183	375	44	1.7227	0.042471
CPM	12	69225977	69375350	544	74	1.7227	0.042474
RNF183	9	116049373	116075656	85	21	1.7226	0.042483
HEG1	3	124674554	124784802	392	45	1.7223	0.042507
OR1D2	17	2985352	3006290	66	13	1.7211	0.04262
IGLON5	19	51805102	51843608	134	27	1.7204	0.042681
ERI3	1	44676742	44830932	405	47	1.7198	0.042732
ST8SIA4	5	100132639	100248970	344	29	1.7197	0.042746
SMCO4	11	93201638	93286674	347	40	1.7196	0.042749
PLD2	17	4700391	4736729	132	34	1.7186	0.042846
GJB1	X	70425044	70455366	72	19	1.7177	0.042925
OR2S2	9	35947105	35968151	109	14	1.7166	0.043024
SPINK5	5	147395246	147526852	709	30	1.716	0.043079
PDK2	17	48162101	48199516	147	33	1.7159	0.043086
NRAP	10	115338475	115433886	413	44	1.7148	0.043187
MAGEA3	X	151924652	151948240	1	1	1.7139	0.043274
MBNL2	13	97863688	98056374	588	57	1.7137	0.043294
C11orf44	11	130532851	130597247	201	27	1.7136	0.043301
ST8SIA1	12	22206707	22599975	1404	82	1.7111	0.043536
ZNF185	X	152072986	152152024	180	23	1.7099	0.043642
RAI14	5	34646342	34842732	805	95	1.709	0.043721
PLAC8L1	5	145453949	145493932	113	7	1.709	0.043724
SET	9	131435703	131468679	41	17	1.7086	0.043759
OR8H2	11	55862519	55883457	171	7	1.708	0.043821
MAGEA10	X	151291782	151317033	50	8	1.708	0.043822
GTPBP4	10	1024338	1075876	271	33	1.7078	0.043837
GSTO1	10	105985114	106037217	254	30	1.7068	0.043929
DNAJB7	22	41245553	41268130	66	20	1.7064	0.043967
CCDC81	11	86075778	86144151	322	38	1.7063	0.043979
CFB	6	31885475	31929825	168	39	1.7061	0.043996
CFB	6	31885475	31929861	168	39	1.7061	0.043996
NSUN2	5	6589352	6643404	326	34	1.7056	0.044042
HIST3H2BB	1	228635808	228656259	66	16	1.7048	0.044118
IER3IP1	18	44671413	44712745	178	24	1.7042	0.04417
TEX28	X	153488930	153533796	7	2	1.7041	0.044179
CGB5	19	49537141	49558568	97	20	1.7038	0.044208
FBLL1	5	167946121	167967639	113	18	1.7016	0.044419
SLAIN1	13	78262023	78348377	252	32	1.7013	0.044441
SAP30L	5	153815517	153850614	104	37	1.7007	0.044497
OR8K3	11	56075783	56096721	89	11	1.7002	0.044551
DAG1	3	49496146	49583048	223	30	1.6999	0.044577
CFD	19	849453	873453	91	19	1.6985	0.044705
ANKRD52	12	56621591	56662175	71	11	1.6974	0.044812
RHOD	11	66814289	66849484	80	25	1.6966	0.044885
SYNDIG1L	14	74862596	74902805	151	29	1.6961	0.044931
TIGIT	3	113985760	114039135	170	38	1.6954	0.044999
STYXL1	7	75615656	75687322	235	35	1.6954	0.045004
RBM39	20	34281531	34340234	183	13	1.6952	0.045016
GPR35	2	241534848	241580676	245	51	1.6948	0.045054
ACMSD	2	135586117	135669604	242	26	1.6945	0.045087
ZBTB49	4	4281924	4333513	309	20	1.6932	0.045213
BPIFA3	20	31795116	31825564	135	20	1.6927	0.045259
CYB5D2	17	4036462	4100605	237	25	1.6922	0.045304
PPP2R5E	14	63828075	64020092	738	45	1.6922	0.045308
MAB21L1	13	36037926	36060832	63	22	1.6918	0.045346
PRDX2	19	12897634	12922694	78	12	1.6915	0.045368
NUDT4	12	93761659	93807024	145	31	1.6909	0.045426
PNPLA2	11	808902	835573	101	24	1.6899	0.045524
OR5M9	11	56219945	56240877	80	12	1.6897	0.045541
FAM183A	1	43600824	43632067	171	27	1.6892	0.045591
FCGR2B	1	161541101	161658444	188	31	1.6885	0.04566
TRIP10	19	6727936	6761537	88	21	1.6885	0.045662
KCNK16	6	39272474	39300744	179	36	1.6884	0.04567
CCDC41	12	94690225	94863764	471	53	1.6882	0.045687
RPS19BP1	22	39915098	39938860	76	17	1.6882	0.045689
SDK1	7	3331080	4318632	6040	175	1.6876	0.04574
CLDN4	7	73203872	73257014	140	10	1.6874	0.045759
CCT8	21	30418126	30456118	101	26	1.6867	0.04583
SCPEP1	17	55045466	55094129	102	19	1.6865	0.045849
NUP62CL	X	106356657	106459670	193	18	1.6861	0.045892
DCAF13	8	104416942	104465681	174	19	1.6859	0.045912
DENND4C	9	19220433	19384139	595	32	1.6854	0.045957
EGLN1	1	231489497	231570790	379	14	1.6848	0.046014
DOT1L	19	2154148	2242577	336	37	1.6844	0.046049
MKNK1	1	47013090	47092515	264	38	1.6842	0.04607
FAR1	11	13680217	13763893	213	38	1.6841	0.046079
GINS3	16	58318984	58450048	548	58	1.6841	0.046085
C15orf54	15	39532885	39557046	104	25	1.6838	0.046114
FASTKD2	2	207620081	207667233	196	31	1.6835	0.046136
LRRN1	3	3831121	3899387	306	43	1.6822	0.046261
IL22RA2	6	137454968	137504785	196	35	1.6817	0.046317
MTA2	11	62350686	62379312	57	11	1.6816	0.046318
PFKFB4	3	48545117	48609448	126	32	1.6807	0.046413
PNMA2	8	26352202	26381608	149	28	1.6804	0.046442
HPS6	10	103815147	103837792	56	28	1.6799	0.046489
ACTA2	10	90684831	90761147	317	51	1.6798	0.046496
TNNI1	1	201363625	201408994	127	38	1.6782	0.046655
LHX1	17	35284084	35311917	70	17	1.6773	0.046737
NAP1L4	11	2955667	3023607	309	30	1.6766	0.046809
PAIP1	5	43516369	43567860	175	25	1.6762	0.046846
C16orf47	16	73150536	73188346	152	31	1.676	0.046871
RPL26	17	8270838	8296531	81	16	1.6758	0.046886
PRKDC	8	48675669	48882743	292	46	1.675	0.046965
SPRR3	1	152964223	152986332	148	5	1.675	0.046967
ST13	22	41210539	41263026	155	34	1.6749	0.046979
C19orf53	19	13874982	13899276	116	11	1.6748	0.046986
SBK3	19	56042023	56066909	138	31	1.6744	0.047021
OAZ3	1	151725445	151753808	97	13	1.674	0.047069
IP6K2	3	48715436	48787786	147	23	1.6739	0.047073
GEMIN6	2	38968676	39022142	149	24	1.6739	0.047079
MCEE	2	71326814	71367369	205	27	1.6732	0.04714
BCMO1	16	81262053	81334747	287	37	1.673	0.047164
ECH1	19	39296062	39332645	123	24	1.6729	0.04717
RIN3	14	92970118	93165339	768	100	1.6712	0.047343
CLN3	16	28467983	28516896	38	4	1.6711	0.047348
C3orf58	3	143680640	143777561	403	21	1.6711	0.047349
TMEM101	17	42078556	42111314	103	18	1.6709	0.047371
RANGAP1	22	41631615	41692255	194	31	1.6704	0.047423
MCM3	6	52118807	52159679	182	35	1.6697	0.047489
MCHR2	6	100357786	100452123	290	36	1.6695	0.047508
FBXO21	12	117571146	117638336	269	16	1.6695	0.047508
ATPAF1	1	47088409	47149539	231	21	1.6694	0.047518
SLC2A6	9	136326217	136354259	96	29	1.6693	0.04753
RHOA	3	49386578	49460431	197	25	1.6692	0.047543
MPHOSPH10	2	71347444	71387231	237	34	1.6688	0.047576
MRI1	19	13865346	13895096	117	14	1.6688	0.047582
APOL6	22	36034442	36074456	157	25	1.6679	0.04767
KRTAP21-1	21	32117439	32137746	46	5	1.6672	0.047741
PHTF1	1	114229453	114312111	182	29	1.6667	0.047784
SIT1	9	35639292	35660937	115	24	1.6658	0.047875
OR5AS1	11	55787895	55808869	195	9	1.6648	0.047974
ITGA1	5	52073730	52265040	797	92	1.6636	0.048093
MAGEA8	X	148999941	149024609	14	5	1.6633	0.048123
OR13C2	9	107356924	107377951	170	12	1.6617	0.048289
CD37	19	49828428	49856592	87	13	1.6613	0.048331
ZFP28	19	57040317	57078169	149	18	1.6607	0.04839
STX4	16	31034210	31064296	50	8	1.6604	0.04842
DACT3	19	47140869	47174395	99	27	1.6591	0.048553
C4orf17	4	100422161	100473460	270	32	1.659	0.048561
SYTL2	11	85395267	85532184	493	40	1.6586	0.0486
RIC8B	12	107158373	107293090	374	42	1.6584	0.048621
LMOD2	7	123285861	123314344	90	21	1.6572	0.048735
ID2	2	8808975	8834583	71	15	1.6565	0.048813
OTX2	14	57257425	57287197	51	20	1.6562	0.048838
B4GALNT4	11	359796	392116	180	31	1.6561	0.048846
JPH1	8	75136935	75243563	463	57	1.6559	0.048875
CNPPD1	2	220026619	220052828	82	12	1.6555	0.04891
SLC35E3	12	69129886	69197508	192	40	1.6552	0.048944
FAM134A	2	220030947	220060201	94	13	1.6549	0.048976
MRPL37	1	54639714	54701137	229	51	1.6548	0.048979
FTHL17	X	31079360	31100170	33	9	1.6547	0.048993
HELT	4	185929995	185951958	107	23	1.6544	0.049018
KIF24	9	34242379	34339198	272	26	1.6542	0.049039
UCN2	3	48589160	48611206	48	22	1.6542	0.049042
HRH1	3	11168779	11315243	571	73	1.6538	0.049081
ACE	17	61544422	61609205	238	41	1.6533	0.049137
TUT1	11	62332517	62369649	64	14	1.653	0.04917
NFATC2IP	16	28952128	28988418	72	15	1.6529	0.049176
CRISP1	6	49791970	49854809	239	26	1.652	0.049265
RGN	X	46927775	46962712	33	4	1.6518	0.049292
ELMOD3	2	85571517	85628875	182	30	1.6511	0.049358
PGBD5	1	230447392	230571475	609	75	1.6509	0.049377
LPAR1	9	113625543	113810981	767	60	1.6506	0.049405
GRM7	3	6801688	7793215	4553	275	1.6494	0.04953
PDCL3	2	101169152	101203197	121	18	1.6493	0.049544
LPPR1	9	103780991	104097417	1406	89	1.6486	0.049619
LDLRAD2	1	22128758	22161714	140	42	1.6485	0.049629
ADRA2C	4	3758075	3780251	102	25	1.6479	0.049683
MAPKBP1	15	42056632	42130053	215	36	1.6473	0.049743
ZP4	1	238035705	238064094	159	28	1.6466	0.049823
PNMA5	X	152147368	152172671	57	10	1.6466	0.049824
OR6K2	1	158659369	158680486	84	21	1.6464	0.049845
GIP	17	47025916	47055958	127	17	1.6458	0.049902
DET1	15	89044790	89099906	206	21	1.6454	0.049945
SNF8	17	46996678	47032479	152	15	1.6449	0.049993
BAAT	9	104112699	104155801	192	16	1.6447	0.050017
PMEL	12	56337889	56377101	64	22	1.6447	0.050021
ZNF470	19	57068880	57110279	191	25	1.6445	0.050032
AMT	3	49444211	49470186	70	15	1.6443	0.050058
F9	X	138602917	138655617	68	10	1.6441	0.05008
ASCC2	22	30174597	30244271	239	36	1.6433	0.050157
RHOU	1	228860824	228892416	123	19	1.6432	0.050173
FBXO17	19	39422044	39476550	208	35	1.6426	0.050228
GDF5OS	20	34010827	34033248	84	12	1.6422	0.050273
FAM155B	X	68715084	68762351	123	32	1.6421	0.05028
OR5J2	11	55934094	55955032	65	11	1.6413	0.050369
LCE2D	1	152625872	152647135	84	14	1.6411	0.05039
SOWAHC	2	110361911	110386563	82	17	1.6411	0.050391
TWSG1	18	9324765	9412418	365	28	1.6409	0.05041
HECW2	2	197049094	197468416	1472	89	1.6409	0.050413
COA4	11	73573712	73598033	92	17	1.6407	0.050432
C5orf34	5	43476803	43525247	166	24	1.6406	0.050445
CLMP	11	122933035	123075989	755	68	1.6392	0.050588
THEGL	4	57386775	57479673	312	41	1.6391	0.050601
NOB1	16	69765770	69798843	106	23	1.6388	0.050627
GPX4	19	1093936	1116787	110	22	1.6386	0.050652
OR8H3	11	55879849	55900787	152	7	1.638	0.050715
SORCS2	4	7184265	7754554	3888	325	1.6371	0.050803
BSPRY	9	116101821	116143513	270	33	1.6361	0.050907
JRKL	11	96113153	96250738	558	49	1.636	0.050915
CNTNAP3	9	39062764	39298312	25	3	1.6355	0.05097
CDRT1	17	15458797	15479590	37	7	1.6353	0.050991
OR8J3	11	55894247	55915194	88	10	1.6346	0.051069
C1orf115	1	220853187	220882499	173	21	1.6328	0.051259
RASD1	17	17387751	17409709	83	15	1.6322	0.051322
HS3ST5	6	114366750	114674209	830	87	1.6319	0.051349
GRAMD1A	19	35475688	35527375	195	26	1.6317	0.051368
BRDT	1	92404928	92489983	334	21	1.6307	0.051477
NPHP1	2	110869888	110972643	272	19	1.6302	0.051533
KCNH7	2	163217917	163705240	1407	93	1.6298	0.051575
ECE1	1	21533740	21681997	569	60	1.6296	0.051594
OR2T27	1	248803232	248824185	1	1	1.6287	0.051683
SNTG1	8	50812349	51716678	3730	96	1.6283	0.051727
MYBPH	1	203126939	203154941	131	32	1.628	0.051759
RBM44	2	238697032	238761451	220	34	1.6273	0.051836
PVR	19	45137098	45176850	104	23	1.6272	0.051848
IFFO2	1	19220775	19293180	331	43	1.627	0.051872
MT1E	16	56649387	56671024	119	28	1.6268	0.05189
LRRC10	12	69992351	70014942	77	16	1.6264	0.051934
PRRC2A	6	31578497	31615548	195	40	1.6259	0.051988
ADCK2	7	140362953	140406061	118	17	1.6257	0.052004
COL17A1	10	105781044	105855760	257	41	1.6245	0.052131
PDP2	16	66902492	66939657	109	19	1.6242	0.052167
MIR3654	11	62317075	62369003	90	16	1.6235	0.052241
PLEKHG5	1	6516152	6590121	237	38	1.6231	0.052289
C4BPA	1	207267607	207328317	201	40	1.6225	0.052351
ZFAND4	10	46101043	46178228	260	12	1.6223	0.052367
PNPT1	2	55851400	55931045	371	35	1.6216	0.05244
OR5T3	11	56009676	56030698	71	10	1.6216	0.052446
MKNK2	19	2027470	2061243	123	33	1.6216	0.05245
GIPC2	1	78435226	78614133	594	49	1.621	0.052511
UBE3A	15	25572381	25694128	404	33	1.6206	0.052548
HELZ2	20	62179439	62215592	144	35	1.6201	0.052603
FAM86A	16	5124305	5157809	116	24	1.6196	0.052656
NDUFS5	1	39481990	39510308	152	17	1.6196	0.052663
C8orf87	8	94136324	94189079	198	40	1.6193	0.052688
ZNF81	X	47686301	47871960	321	20	1.6187	0.052754
HSD17B7	1	162750492	162792607	133	31	1.6187	0.052759
PCM1	8	17770349	17895478	757	33	1.6169	0.052952
SLC29A1	6	44177242	44211888	111	32	1.616	0.053049
URAD	13	28541851	28572791	88	15	1.6149	0.053163
SPATA25	20	44505128	44526274	76	16	1.6147	0.053192
AASS	7	121705701	121794334	217	33	1.6146	0.053196
NEURL2	20	44507264	44529926	87	21	1.6146	0.053204
CDK2	12	56350553	56376568	45	15	1.6139	0.053275
FAM219A	9	34388182	34468568	270	32	1.6138	0.053282
RASA3	13	114737194	114908086	912	47	1.6135	0.05332
SPATS1	6	44300397	44354904	208	36	1.6133	0.053345
SLMO1	18	12397895	12442237	201	43	1.6131	0.053359
SLC35D2	9	99072988	99155992	360	27	1.613	0.053369
UBE2Z	17	46975731	47016418	150	12	1.6127	0.053405
LRGUK	7	133802052	133959343	711	23	1.6115	0.053531
ETS1	11	128318656	128467453	491	89	1.6115	0.053537
WDR43	2	29107509	29181088	332	24	1.6112	0.053568
RRAS2	11	14289472	14396052	212	55	1.6109	0.053605
C3orf84	3	49205065	49239291	67	13	1.6108	0.053616
OR10AG1	11	55724975	55745990	180	7	1.6098	0.053725
TEN1	17	73965301	74006667	173	30	1.6089	0.053817
TRIM34	11	5630994	5675628	248	44	1.6071	0.054012
B4GALNT3	12	559530	682675	632	99	1.6067	0.054058
ARL17B	17	44342150	44449130	1	1	1.6057	0.054169
OR5F1	11	55751157	55772101	161	7	1.6054	0.054198
GDF5	20	34011145	34052568	111	16	1.605	0.054252
ERO1L	14	53096634	53172618	192	31	1.6042	0.05434
CHRAC1	8	141511397	141537236	63	16	1.6025	0.054528
HS1BP3	2	20750208	20860849	638	64	1.6023	0.05454
ZNF141	4	321603	388653	276	17	1.6022	0.054559
POU5F1B	8	128416535	128442311	125	20	1.6021	0.054562
GPR31	6	167559759	167581817	85	17	1.6011	0.05468
SSU72	1	1467053	1520249	120	12	1.6001	0.054791
DTHD1	4	36273244	36357378	371	51	1.6	0.054802
TSPYL1	6	116587741	116611066	104	19	1.5985	0.054967
CRIP2	14	105929299	105956499	23	8	1.5979	0.055035
KCNK17	6	39256777	39292329	195	38	1.5976	0.055066
FAM21C	10	46212648	46298409	21	1	1.597	0.055128
FAS	10	90740414	90785542	242	29	1.5968	0.055156
EPN3	17	48599904	48631111	154	32	1.5963	0.055207
NCKIPSD	3	48691364	48733797	86	16	1.5959	0.055257
HSD17B12	11	43567986	43888167	1126	52	1.5954	0.05531
LPAR4	X	77993206	78022591	59	12	1.5951	0.055347
RPS6KA5	14	91326799	91536980	714	56	1.5949	0.055372
SRP68	17	74025184	74078734	133	20	1.5941	0.055459
CTAGE5	14	39724488	39866156	531	32	1.5939	0.055475
CIITA	16	10961055	11036079	221	49	1.5933	0.055542
S100B	21	48008875	48035121	187	24	1.5932	0.055556
NICN1	3	49450379	49476759	71	17	1.593	0.055577
KLK10	19	51505995	51533431	96	13	1.5929	0.055587
CD200	3	112041194	112091659	207	30	1.5927	0.055616
CLLU1	12	92805307	92834778	106	21	1.5925	0.055632
WDR20	14	102595840	102701184	339	33	1.5922	0.055673
CEBPD	8	48639471	48661648	29	14	1.592	0.055692
HIST3H2A	1	228635065	228655560	64	16	1.592	0.055693
ARF6	14	50349810	50371490	40	10	1.5918	0.055717
APCS	1	159547615	159568655	113	23	1.5915	0.055753
CDH24	14	23506271	23536747	91	22	1.5915	0.055754
CLLU1OS	12	92803870	92831924	95	16	1.5904	0.05587
ABHD15	17	27877565	27904155	54	27	1.5894	0.055981
SCFD1	14	31081318	31215018	396	32	1.5894	0.055982
CGB8	19	49540895	49562400	110	23	1.5894	0.055986
RTFDC1	20	55033647	55103943	239	21	1.5887	0.056064
FANCC	9	97851336	98089991	431	47	1.588	0.056143
MATK	19	3767971	3812127	174	44	1.5877	0.056176
GNG12	1	68157149	68309150	547	49	1.5874	0.056213
USP16	21	30386950	30436809	114	26	1.5874	0.056215
G0S2	1	209838765	209859733	52	13	1.5874	0.056216
CCDC134	22	42186683	42232303	155	28	1.587	0.05626
SLC37A3	7	139983493	140114233	594	59	1.5863	0.056338
BLACE	7	155139680	155170629	189	24	1.586	0.056367
DAD1	14	23023805	23068175	314	22	1.5854	0.056434
MAST1	19	12934765	12995765	149	19	1.5851	0.056468
UBAP2	9	33911691	34058947	505	24	1.5848	0.056505
GPX1	3	49384609	49406033	48	13	1.5846	0.056531
TMEM233	12	120021264	120089363	216	19	1.5844	0.056546
LEPROT	1	65876270	65911690	102	24	1.584	0.056602
ADPRM	17	10590911	10624550	169	13	1.5833	0.056681
ACOX1	17	73927588	73985515	250	39	1.5822	0.056807
ARL9	4	57361509	57400614	124	20	1.582	0.05682
GPR143	X	9683386	9764337	136	27	1.581	0.056938
RNMTL1	17	675513	705749	111	24	1.5805	0.056992
OIP5	15	41591466	41634819	132	18	1.5804	0.057007
MAP3K5	6	136868185	137123656	685	63	1.5802	0.057029
KRBA2	17	8261955	8290029	70	15	1.5801	0.057042
LPPR5	1	99345806	99480588	616	63	1.5799	0.057059
CD46	1	207915402	207978858	187	25	1.5791	0.057154
TULP4	6	158723692	158942860	879	44	1.5791	0.057155
DCAF15	19	14053304	14082254	74	9	1.5786	0.057212
ABHD11	7	73140424	73163197	66	16	1.5778	0.057307
PODNL1	19	14032000	14074204	83	15	1.5772	0.057374
CLIP4	2	29310571	29422509	419	51	1.576	0.057516
WBSCR27	7	73238920	73266865	86	5	1.5754	0.057583
LPAR3	1	85267285	85368896	475	81	1.5754	0.057585
GDPGP1	15	90767040	90795315	171	19	1.5752	0.057607
KCTD19	16	67313331	67370666	129	25	1.575	0.057627
FAM171B	2	187548698	187640685	236	36	1.5741	0.057737
NDUFB2	7	140380577	140432590	114	19	1.5737	0.057783
PNRC2	1	24275599	24299952	5	2	1.5731	0.057847
SPRR1A	1	152946557	152968289	83	6	1.5727	0.057896
LMBRD1	6	70375694	70517003	613	23	1.5719	0.05799
MMS19	10	99208081	99268551	196	43	1.5718	0.057995
C8orf59	8	86116311	86142650	42	10	1.5717	0.058007
CAPN10	2	241516133	241567122	257	30	1.5716	0.058023
IL1RL2	2	102793433	102866462	378	31	1.5713	0.058052
C3orf62	3	49296035	49325342	61	21	1.5697	0.058241
ARL4C	2	235391685	235415697	99	33	1.5692	0.058297
NRXN2	11	64363646	64500660	328	32	1.5691	0.058317
TMEM128	4	4227269	4259950	93	14	1.5691	0.058318
TRIM51	11	55640773	55669286	143	11	1.569	0.058327
ZC3H8	2	112959102	113022713	116	20	1.5689	0.05833
SCN2A	2	166085912	166258818	697	56	1.5683	0.058405
PHF5A	22	41845721	41874729	78	16	1.5678	0.058468
ERVMER34-1	4	53578785	53627807	109	12	1.5673	0.05852
INPP4B	4	142934313	143778585	2921	117	1.5664	0.058625
EEF1G	11	62317073	62352401	63	12	1.5659	0.058687
GREB1	2	11664242	11792914	481	66	1.5653	0.058754
REL	2	61098656	61168745	161	40	1.5652	0.058762
GPR151	5	145882666	145905753	69	14	1.5651	0.058777
PABPC1L2A	X	72287115	72309351	37	5	1.5651	0.058781
CNOT7	8	17076737	17114387	125	27	1.5638	0.058938
FKBP8	19	18632561	18664887	76	24	1.5637	0.058949
FAM161B	14	74388204	74427117	171	21	1.5634	0.05898
SRD5A3	4	56202276	56249263	174	29	1.5632	0.059001
PCIF1	20	44553267	44586662	124	35	1.5615	0.059206
TBC1D16	17	77896142	78019647	486	102	1.5603	0.059346
GUCY1A3	4	156577863	156663501	333	44	1.5578	0.05964
KLF1	19	12985237	13007995	50	13	1.5567	0.059771
TMEM99	17	38965358	39002522	126	25	1.5565	0.059792
TCEB3B	18	44548943	44571988	68	16	1.5559	0.059868
TPH2	12	72322626	72590398	853	48	1.5542	0.060069
DERA	12	16054106	16200220	342	56	1.5539	0.060102
EMID1	22	29591840	29665586	280	42	1.5537	0.060128
CDH15	16	89228175	89271900	231	33	1.5537	0.060132
C6orf62	6	24695089	24731064	172	48	1.5536	0.060143
PIH1D2	11	111924734	111954998	65	13	1.5533	0.060171
ANKFY1	17	4057201	4177274	300	25	1.553	0.060209
BEND7	10	13470484	13580974	480	45	1.5527	0.060251
CARD10	22	37876400	37925549	202	34	1.5526	0.060264
C1orf168	1	57174477	57295369	498	81	1.5518	0.06036
CMAS	12	22189108	22228608	120	18	1.5514	0.060399
MEDAG	13	31470328	31509709	157	36	1.5512	0.060431
ZNF783	7	148949262	149004393	225	40	1.5512	0.060432
ZNF558	19	8910380	8953004	125	16	1.5506	0.060502
IFNA6	9	21339834	21361377	108	17	1.5505	0.060506
AK3	9	4701155	4752043	292	36	1.5502	0.060544
PCMTD1	8	52720140	52821735	416	21	1.5498	0.060596
POLR3H	22	41911808	41950610	118	18	1.5497	0.06061
DPCD	10	103320317	103379425	163	28	1.5487	0.060727
TLR5	1	223272748	223326624	238	21	1.548	0.060809
ARL17A	17	44584068	44667088	3	1	1.5469	0.060943
CHML	1	241782155	241809232	94	22	1.5466	0.060985
DDIT4L	4	101097027	101121939	136	27	1.5463	0.06101
HCFC2	12	104448235	104508639	202	41	1.5463	0.06102
EFCAB14	1	47114366	47194824	300	21	1.5463	0.061021
BST1	4	15694573	15749936	291	29	1.5462	0.061027
ZNF317	19	9241056	9284100	224	28	1.546	0.061055
SLC39A3	19	2722202	2750150	108	16	1.5455	0.06111
RAD51B	14	68276496	69206935	3373	162	1.5453	0.061132
C17orf107	17	4792713	4816227	126	25	1.545	0.061176
ECE2	3	183957438	184020819	161	32	1.5444	0.061243
NCKAP5	2	133419374	134336034	3447	231	1.5437	0.061328
SLITRK1	13	84441344	84466528	67	19	1.5434	0.061362
RAPGEF3	12	48118455	48174823	244	43	1.5434	0.06137
USB1	16	58023450	58065522	117	22	1.5428	0.06144
PAICS	4	57291907	57337534	131	18	1.5425	0.06148
RPLP0	12	120624489	120649038	61	19	1.542	0.061539
SLC16A13	17	6929394	6953440	95	20	1.5404	0.061726
MDH2	7	75667369	75706826	143	20	1.5403	0.061743
C4B	6	31972539	32013195	69	29	1.5402	0.06176
ROM1	11	62369194	62392592	52	11	1.5397	0.061812
UCN3	10	5396972	5426169	175	27	1.5387	0.061939
KRT40	17	39123968	39153387	241	19	1.5387	0.06194
ZNF577	19	52349055	52404203	337	19	1.5385	0.061959
NPIPB8	16	28638975	28680003	3	1	1.5381	0.062018
MPP4	2	202499593	202573417	243	63	1.5377	0.062066
LHX5	12	113889839	113920085	74	8	1.5375	0.062089
EDAR	2	109500927	109615828	505	37	1.5373	0.062115
ZNF668	16	31062164	31095641	69	13	1.5369	0.062165
CNOT11	2	101859264	101896778	87	22	1.5365	0.062206
DDX23	12	49213547	49256625	82	20	1.5359	0.062285
WDR35	2	20100021	20199892	283	27	1.5354	0.062349
RNASE7	14	21500385	21522393	90	36	1.535	0.062396
MAST3	19	18198603	18272502	301	27	1.5345	0.062457
C8orf37	8	96247147	96291429	237	30	1.5344	0.062465
NRTN	19	5813813	5838335	109	20	1.5343	0.062481
LELP1	1	153165919	153187596	79	18	1.5336	0.062569
SCHIP1	3	159547650	159625149	202	50	1.5332	0.062613
PDCL2	4	56412692	56468379	233	24	1.5328	0.062665
VSTM2B	19	30007406	30065386	324	44	1.5319	0.062777
ZBTB7C	18	45543044	45947123	1822	204	1.5317	0.062793
COL7A1	3	48591506	48642700	101	41	1.5317	0.062799
MBNL3	X	131493345	131633996	136	43	1.5308	0.062914
OR5M11	11	56299746	56320757	117	16	1.5301	0.062994
ALKBH8	11	107363452	107446472	366	33	1.53	0.063005
EBNA1BP2	1	43619846	43746607	593	41	1.5298	0.063038
HIST3H3	1	228602546	228623026	94	19	1.5297	0.063044
ATF6	1	161726084	161943860	749	31	1.5289	0.06314
PTPRR	12	71021853	71324623	1250	128	1.5288	0.063153
SHANK1	19	51155084	51232707	188	50	1.5283	0.06322
NTN4	12	96041583	96194930	729	69	1.5279	0.063271
REC8	14	24631062	24659463	71	19	1.5275	0.063318
C5orf22	5	31522373	31565165	195	39	1.527	0.063381
C15orf38-AP3S2	15	90367540	90466114	253	18	1.5268	0.063402
FAM35A	10	88843918	88961225	273	18	1.5268	0.063404
CST4	20	23656277	23679677	116	26	1.5256	0.063555
SYNGR1	22	39735930	39791593	216	33	1.5254	0.063582
HIP1	7	75152621	75378280	835	74	1.5249	0.063641
KLK11	19	51515472	51541295	97	16	1.5247	0.063671
SLC12A1	15	48473861	48606275	323	19	1.5242	0.063724
ZNF677	19	53721577	53768151	237	24	1.5242	0.063725
SLIT1	10	98747795	98955677	798	90	1.5239	0.06377
HTR3C	3	183760835	183788459	129	29	1.5238	0.063775
MAGEA11	X	148759894	148808926	58	10	1.5225	0.063938
TRIB1	8	126432563	126460647	79	24	1.5219	0.064019
SLC22A31	16	89252406	89278072	146	25	1.5218	0.064024
EN1	2	119589747	119615254	71	20	1.5218	0.064025
DCTN6	8	30003813	30051156	145	20	1.5212	0.064104
PARM1	4	75848305	75985325	311	36	1.5203	0.064222
RAP1A	1	112074840	112269313	810	58	1.5194	0.064335
FMNL1	17	43288811	43334687	138	32	1.5192	0.064353
RARRES3	11	63294281	63323934	56	17	1.5192	0.064356
FZD2	17	42624925	42646907	70	24	1.5184	0.064454
UBE2R2	9	33807565	33930402	400	28	1.5182	0.064477
PLLP	16	57280004	57328599	217	33	1.5181	0.064495
MTSS1L	16	70685107	70729969	217	49	1.518	0.064505
VPS37A	8	17094080	17169936	339	38	1.518	0.064511
EFCAB12	3	129110164	129157494	218	25	1.5179	0.064519
SBDS	7	66442664	66470588	87	25	1.5176	0.064558
OR10J3	1	159273460	159294449	64	15	1.517	0.064633
CGB1	19	49528831	49562006	185	31	1.5168	0.064662
CHMP2B	3	87266421	87314698	138	24	1.5166	0.064679
NFIA	1	61320931	61938465	2061	226	1.5165	0.064702
RCBTB2	13	49053095	49117369	226	35	1.5158	0.064785
SFRP4	7	37935543	38075297	731	78	1.5156	0.064806
LUZP2	11	24508516	25114150	3437	135	1.5147	0.064925
NDUFAF2	5	60230956	60458853	682	32	1.5134	0.065093
TMEM143	19	48825613	48877494	193	29	1.5132	0.06511
FOXD1	5	72730654	72754352	71	13	1.5116	0.065322
RASL11B	4	53718457	53743000	108	17	1.5112	0.065364
LRRN4	20	6011424	6044695	110	20	1.5111	0.065386
LIPG	18	47077069	47129272	172	43	1.511	0.065393
CITED2	6	139683393	139705757	71	18	1.5107	0.065428
KLF17	1	44574522	44610812	161	37	1.5101	0.065512
KCNA5	12	5143085	5165949	110	33	1.5099	0.065534
ODF2	9	131207465	131273571	147	14	1.509	0.065651
CRHR2	7	30682200	30749745	236	58	1.5088	0.06568
ASB15	7	123197064	123287951	293	31	1.5082	0.065751
RMI2	16	11333476	11455619	620	33	1.5072	0.065876
IER3IP1	18	44651027	44712652	266	24	1.5072	0.065882
CHADL	22	41615517	41646938	117	21	1.5055	0.066097
DHRS7B	17	21016677	21106578	261	31	1.5054	0.066111
DYX1C1	15	55692723	55810432	567	40	1.504	0.066295
MYOG	1	203042260	203065164	73	27	1.5035	0.06635
ASS1	9	133310316	133386661	302	63	1.5034	0.066364
RAB23	6	57043607	57097078	86	24	1.503	0.066423
KRT10	17	38964369	38988847	84	21	1.5027	0.066461
CLCC1	1	109462130	109516111	226	38	1.5019	0.066557
GAPDH	12	6633093	6657537	94	19	1.5019	0.066563
DKKL1	19	49855040	49888373	152	11	1.5018	0.066571
DLG5	10	79540549	79696378	695	37	1.5017	0.066585
CHRNE	17	4791069	4816369	135	27	1.5013	0.066637
FERMT2	14	53313986	53429153	427	39	1.5011	0.066662
DOCK11	X	117619861	117830126	368	46	1.5002	0.066788
ZNF609	15	64742941	64988264	697	36	1.5001	0.06679
NEFH	22	29866219	29897379	114	28	1.5	0.066807
CD72	9	35599530	35656807	222	45	1.4996	0.066862
RPS7	2	3612795	3638509	123	30	1.4995	0.066873
ZNF69	19	11988599	12035144	175	26	1.4994	0.06689
TOB2	22	41819496	41853027	101	11	1.499	0.066936
CFLAR	2	201970827	202051410	209	26	1.4989	0.066946
IFNA13	9	21357371	21378075	95	11	1.4988	0.066959
RTBDN	19	12926292	12956242	86	18	1.4984	0.067014
SPATA32	17	43321760	43349479	81	21	1.4982	0.067042
CACFD1	9	136315089	136345970	111	26	1.4974	0.067139
NDRG2	14	21474922	21549031	268	74	1.4971	0.067177
GOLGA6A	15	74352198	74384891	18	12	1.497	0.067195
PCDH12	5	141313150	141359304	149	35	1.4966	0.067249
STX16	20	57216328	57264582	134	33	1.4965	0.067266
PDK4	7	95202811	95235803	189	31	1.4964	0.067272
BFSP1	20	17464550	17559865	400	82	1.4964	0.067276
TP63	3	189339205	189625068	1350	155	1.4951	0.067448
OR5M8	11	56247825	56268871	90	15	1.4938	0.067613
SLC7A6	16	68288433	68345722	161	32	1.4927	0.067754
RRP7A	22	42895974	42925808	120	13	1.4927	0.067757
FREM1	9	14724664	14920993	1038	111	1.4922	0.067824
C21orf54	21	34527776	34552541	105	26	1.4921	0.06784
NUDT2	9	34319504	34353709	92	20	1.4915	0.067917
OR2T6	1	248540910	248561836	122	8	1.4914	0.06793
OR4C12	11	49993009	50014071	66	10	1.4913	0.067947
FKBP7	2	179318391	179353327	121	20	1.4912	0.067958
NCAPD2	12	6592522	6651121	263	26	1.4907	0.068022
R3HDM4	19	886503	923240	127	35	1.4905	0.068051
ABL1	9	133579333	133773062	739	64	1.4901	0.0681
CTNNB1	3	41226328	41311587	209	33	1.49	0.068115
ZNF710	15	90534624	90635438	215	36	1.4898	0.068144
CDIPT	16	29859678	29885057	39	12	1.4892	0.068223
ACSM2B	16	20537548	20597749	166	19	1.4889	0.068255
FAM3B	21	42666139	42739358	279	47	1.4889	0.068256
KIAA0141	5	141293373	141331612	141	21	1.4889	0.068259
ARID1B	6	157089063	157541913	1518	126	1.4889	0.068259
CLEC16A	16	11028345	11286046	1055	50	1.4888	0.068266
ZDHHC1	16	67418322	67460736	111	20	1.4886	0.068292
SLC19A3	2	228539926	228592728	277	29	1.4884	0.068318
CNIH3	1	224612362	224938251	1276	79	1.4884	0.068321
OR5K1	3	98178324	98199420	63	17	1.4882	0.068354
OR4C15	11	55311783	55332895	160	13	1.4878	0.068405
SARS	1	109746540	109790791	113	25	1.4876	0.068426
MIOS	7	7596503	7658560	354	33	1.4875	0.068448
TAS2R38	7	141662431	141683573	18	9	1.4874	0.068454
RFX1	19	14062350	14127851	155	16	1.4874	0.068455
P2RY10	X	78190829	78227451	62	21	1.4872	0.06848
C14orf144	14	104700541	104722473	112	11	1.4851	0.068762
MRPL19	2	75863909	75927977	272	29	1.485	0.068767
DNAJC24	11	31381387	31463396	200	32	1.4845	0.068841
AP3S2	15	90363831	90447574	237	22	1.4843	0.068866
NLRP10	11	7970971	7996973	90	20	1.4838	0.068925
PLP1	X	103018647	103057548	65	16	1.4833	0.069
OPN1MW2	X	153475225	153508755	4	1	1.4827	0.069074
OR2C3	1	247683434	247707141	98	18	1.4822	0.069143
C7orf33	7	148277657	148322952	123	25	1.4822	0.069148
LTN1	21	30290466	30375270	230	37	1.4821	0.06916
SYP	X	49034269	49066718	42	15	1.4819	0.069184
C19orf80	19	11338178	11362619	54	12	1.4818	0.069192
APOF	12	56744353	56766607	41	11	1.4817	0.069207
CARS	11	3012152	3088843	297	26	1.4812	0.069272
SDHA	5	208356	266815	357	6	1.4808	0.069325
SARS2	19	39395906	39450495	213	32	1.4805	0.06937
UBA6	4	68468370	68576897	382	19	1.4798	0.069461
TCEB3C	18	44544573	44566449	46	11	1.4797	0.069475
SLC2A1	1	43381052	43434530	230	32	1.4789	0.069588
NEUROD6	7	31367075	31390508	60	23	1.4775	0.069766
CEP170B	14	105321617	105373107	207	20	1.4775	0.069771
AGAP5	10	75424033	75467639	34	6	1.4773	0.069792
TBCE	1	235520675	235622283	346	32	1.4772	0.069805
SPATA21	1	16703612	16773919	217	37	1.477	0.069835
CCDC150	2	197494278	197638214	378	28	1.4764	0.069913
COX19	7	928415	1025235	553	74	1.4754	0.070054
MIER3	5	56205429	56277502	314	27	1.4748	0.07013
ST18	8	53013399	53383519	1079	91	1.4744	0.07019
FBXO42	1	16563334	16688949	319	17	1.4737	0.070285
DMAP1	1	44669127	44696353	73	22	1.4731	0.070366
IGSF22	11	18715852	18757777	140	31	1.473	0.07038
SUSD4	1	223384161	223547544	515	37	1.4728	0.0704
OC90	8	133026467	133107902	420	56	1.4723	0.070464
CXCL10	4	76932273	76954650	106	8	1.4723	0.070466
CTHRC1	8	104373743	104405225	138	19	1.4714	0.070591
ZSWIM5	1	45472071	45781881	804	39	1.4704	0.070723
ANKRD33B	5	10554442	10660308	363	39	1.4704	0.070731
CD276	15	73966307	74016859	192	32	1.4697	0.070817
PLEKHJ1	19	2220002	2247703	99	25	1.4683	0.071013
2011-03-01	5	16057248	16190871	468	56	1.468	0.071053
EPHB1	3	134306643	134989309	2808	204	1.4676	0.071106
ACO2	22	41855129	41934993	208	39	1.4671	0.071181
ARHGAP28	18	6719717	6925715	686	72	1.4666	0.071247
C20orf27	20	3724155	3759034	132	39	1.4664	0.071272
SH2D4A	8	19161128	19263729	433	63	1.4659	0.071336
ZNF646	16	31075743	31105517	68	14	1.4659	0.071337
CLCNKB	1	16360272	16393803	271	25	1.4653	0.071416
POF1B	X	84522402	84644748	200	19	1.4644	0.071547
ZFAND5	9	74956341	74990163	120	18	1.4643	0.071554
CCDC17	1	46075716	46099729	103	14	1.4636	0.071647
SH3BP2	4	2784750	2852825	362	49	1.4631	0.071721
SNRPB2	20	16700606	16732421	145	39	1.4631	0.071726
LHX2	9	126753949	126805580	183	30	1.463	0.071736
TYRP1	9	12675439	12720290	197	23	1.4626	0.071789
ZSWIM1	20	44499866	44523905	89	16	1.4622	0.071839
OR6K6	1	158714510	158735681	119	21	1.4622	0.071843
CXCL11	4	76944835	76972568	236	7	1.4617	0.071908
KLHL6	3	183195319	183283477	305	41	1.4614	0.071949
SLC31A1	9	115973808	116038674	232	30	1.4613	0.071965
OR4A16	11	55100627	55121707	74	12	1.4607	0.07205
BOC	3	112919850	113016303	452	66	1.4603	0.072099
PARL	3	183537173	183612721	340	31	1.4603	0.072101
OR5AP2	11	56398942	56419947	75	19	1.4601	0.072138
MYO9B	19	17176591	17335346	765	78	1.46	0.072143
IFI44	1	79105481	79139763	102	23	1.46	0.072144
RPL7	8	74192506	74218024	97	18	1.4597	0.072188
ZNF487	10	43922282	44001517	356	27	1.4593	0.072235
KLK15	19	51318545	51350469	163	42	1.4588	0.072317
MBD5	2	148768580	149285805	1613	76	1.4586	0.07234
NBEA	13	35506424	36257159	2511	88	1.4585	0.072347
FBXL5	4	15596162	15693302	335	27	1.4584	0.072366
FAM134B	5	16463147	16627167	620	69	1.4581	0.072411
NLGN1	3	173104074	174014434	3274	174	1.4579	0.072432
PKP2	12	32933679	33059774	529	43	1.4575	0.072486
NPY5R	4	164255091	164283086	135	24	1.4573	0.072521
ENTPD1	10	97461536	97647023	694	35	1.456	0.072696
OR10S1	11	123837368	123858488	112	20	1.4558	0.072726
SWT1	1	185116212	185270897	499	30	1.4555	0.07276
TNFRSF14	1	2477078	2506821	100	14	1.4555	0.072763
PTCHD4	6	47835764	48046425	1023	48	1.4552	0.072807
SPTBN5	15	42130345	42196275	273	36	1.4542	0.072941
DGKG	3	185813457	186090026	729	125	1.454	0.072974
SPAG16	2	214139113	215285225	4541	114	1.4536	0.073034
BMP10	2	69082613	69108649	62	12	1.4534	0.073054
MYPN	10	69855912	69981774	609	46	1.4532	0.073086
RAB37	17	72656717	72753474	194	43	1.4516	0.073307
TMEM240	1	1460554	1485833	57	11	1.4501	0.07352
FTSJ2	7	2263866	2291840	145	29	1.4501	0.07352
MAX	14	65462892	65579413	467	53	1.45	0.073535
ERCC8	5	60159658	60250900	301	27	1.4497	0.073573
DYRK2	12	68032118	68069186	117	23	1.4487	0.073708
STAP1	4	68414446	68483055	274	33	1.4483	0.07376
MITF	3	69778586	70027488	845	39	1.448	0.07381
PA2G4	12	56488103	56517691	49	17	1.4476	0.073863
OR14A2	1	247876401	247897345	49	7	1.4467	0.073992
CCDC113	16	58255061	58327740	406	33	1.4461	0.074078
HYAL4	7	123459037	123527532	204	42	1.4453	0.074193
ITGB3	17	45321212	45431658	475	47	1.4445	0.074301
ITGB3	17	45321263	45431658	475	47	1.4445	0.074301
KRTAP22-1	21	31963414	31983612	51	9	1.4445	0.074303
XRCC3	14	104153946	104191841	135	25	1.4439	0.074384
LRRC8B	1	89980395	90073423	293	25	1.4438	0.074396
GOLGA8A	15	34661269	34890704	502	28	1.4437	0.074416
OR4C13	11	49963943	49984971	84	11	1.4436	0.074422
ASB18	2	237092095	237183052	385	26	1.4433	0.074474
PRRC2B	9	134259480	134385584	396	37	1.4432	0.074476
CDRT15L2	17	20473037	20494224	5	3	1.4431	0.074497
ADD2	2	70824750	71005357	850	55	1.4427	0.074558
FZD6	8	104300661	104355094	215	27	1.4426	0.07456
AP3D1	19	2090988	2174464	373	33	1.4422	0.074626
HOXB3	17	46616232	46692274	212	40	1.4416	0.074708
RGS14	5	176774838	176809602	85	17	1.4412	0.074763
PAIP2B	2	71399869	71464213	317	31	1.4409	0.074806
LRRC36	16	67350701	67429106	203	26	1.4404	0.074876
OR8K5	11	55916870	55937793	65	15	1.4402	0.07491
TRIM15	6	30120993	30150473	249	28	1.4399	0.074947
MAP10	1	232930643	232956092	82	17	1.4398	0.074967
ANKRD23	2	97480263	97533671	104	19	1.4397	0.074971
CXorf23	X	19920978	19998416	97	12	1.4395	0.075006
SYT9	11	7250009	7500273	1244	117	1.4394	0.075014
C9orf41	9	77585936	77653339	197	32	1.439	0.075073
ZNF541	19	48013942	48069113	136	24	1.4383	0.075172
HLA-E	6	30447244	30471982	123	29	1.4382	0.075194
EDN3	20	57865482	57911047	103	35	1.438	0.075222
IL31	12	122646577	122668746	77	12	1.4379	0.075232
VENTX	10	135040908	135065433	129	26	1.4379	0.075234
IFIT1	10	91142303	91173745	135	31	1.4376	0.07527
ZCCHC18	X	103346822	103370533	26	9	1.4374	0.075299
GPR12	13	27319341	27344922	122	19	1.4374	0.075307
ZNF683	1	26678125	26711013	143	25	1.4371	0.075346
FAM206A	9	111686461	111723024	126	21	1.4368	0.075386
HERC4	10	69671665	69845105	440	37	1.4367	0.075402
PCDH7	4	30712037	31158422	1681	86	1.4364	0.07544
CD244	1	160789950	160842692	280	31	1.4361	0.075484
WDTC1	1	27551007	27645110	162	20	1.4361	0.075489
PRKAR2A	3	48772030	48895279	152	31	1.436	0.075497
KLHDC8B	3	49199044	49223917	50	12	1.4353	0.075597
TRIM17	1	228585641	228614562	97	21	1.435	0.075646
NUDT1	7	2271857	2300781	159	33	1.4348	0.075668
SP9	2	175189674	175213220	81	25	1.4348	0.075676
JUNB	19	12892310	12914124	50	14	1.4347	0.075682
C1orf53	1	197861777	197886497	71	28	1.4347	0.075691
ANKRD40	17	48760551	48795285	100	28	1.434	0.075785
CCDC90B	11	82960139	83007450	185	27	1.4338	0.075817
PRKRIR	11	76051000	76102015	123	28	1.4337	0.07583
PNO1	2	68374976	68413370	136	23	1.4336	0.075844
TDG	12	104349582	104392652	204	34	1.4329	0.075943
ARPC1B	7	98961872	99002424	119	21	1.4328	0.075958
CACNA1F	X	49051523	49099833	60	12	1.4326	0.075981
KRTAP6-1	21	31975750	31996249	45	7	1.4326	0.075988
POLD3	11	74194896	74390162	902	47	1.4323	0.076035
NXF2B	X	101605316	101736732	3	2	1.4322	0.076039
TCP11X2	X	101619549	101736732	3	2	1.4322	0.076039
QRICH1	3	49057140	49141796	131	33	1.4322	0.076045
ZNF549	19	58028693	58078910	187	29	1.4318	0.076105
C1orf21	1	184346192	184608154	933	74	1.4307	0.07626
OR52E6	11	5852158	5873182	153	10	1.4303	0.076322
PSMA6	14	35737839	35796699	234	30	1.4296	0.076421
CLVS2	6	123307116	123404072	376	52	1.4295	0.076425
BPIFA2	20	31739574	31779218	197	15	1.4294	0.076452
IFT88	13	21130585	21275503	474	27	1.4293	0.076463
CDKN2A	9	21957751	22005300	118	31	1.4291	0.076485
FAM131A	3	184043714	184074063	105	33	1.4289	0.076516
C9orf40	9	77551497	77577802	67	18	1.4284	0.07659
SLC25A17	22	41155634	41225403	186	30	1.4283	0.076606
ANKRD30B	18	14718271	14862737	324	14	1.4279	0.076656
RXFP1	4	159226463	159584524	1257	36	1.4272	0.076762
IL20	1	207028699	207052568	58	23	1.4272	0.076768
WARS2	1	119563839	119693294	424	37	1.427	0.076784
SLU7	5	159818648	159858718	133	29	1.4257	0.07698
RCOR1	14	103048998	103206913	516	28	1.4256	0.076987
TPM4	19	16167831	16223813	171	28	1.4255	0.077001
OR4A15	11	55125360	55146394	113	16	1.4251	0.077067
DFNB59	2	179306163	179336117	94	18	1.4249	0.077096
OSBPL9	1	52032851	52264889	679	45	1.4249	0.077099
CD53	1	111405775	111452550	191	31	1.4247	0.077117
GNPNAT1	14	53231912	53268386	80	18	1.4247	0.077125
FAM149A	4	187015573	187103821	398	50	1.4245	0.077144
KLHL9	9	21319670	21345379	85	15	1.4237	0.077264
MRGPRX2	11	19066002	19092228	152	19	1.4236	0.077285
AHCYL1	1	110517308	110576357	154	24	1.4235	0.077291
IL7	8	79577978	79727758	419	33	1.4234	0.077306
PAQR8	6	52216219	52282575	310	50	1.423	0.077363
OR5W2	11	55671126	55692058	179	8	1.4228	0.077395
PANX3	11	124471386	124500252	56	21	1.4228	0.077404
LCE1B	1	152774447	152795585	88	22	1.4226	0.07743
ZNF536	19	30709197	31214445	1478	178	1.422	0.07751
SLC36A1	5	150806607	150881942	341	41	1.4215	0.07758
PROX1	1	214146524	214224595	244	41	1.4214	0.077598
THUMPD2	2	39953200	40016407	213	23	1.4214	0.077606
MAK	6	10752956	10848764	282	38	1.421	0.077656
EMCN	4	101306498	101811283	2139	76	1.4208	0.077687
C10orf35	10	71380007	71403352	101	21	1.4198	0.077839
SERPINF2	17	1636130	1668562	124	19	1.4195	0.077882
FCRL1	1	157754193	157799895	145	24	1.4189	0.077962
CDC42SE2	5	130571186	130744140	491	45	1.4187	0.077996
TRPM8	2	234816043	234938166	669	89	1.4185	0.078015
PTGER3	1	71308036	71523491	806	61	1.4181	0.078077
SDR16C5	8	57202569	57243335	160	26	1.4179	0.078117
ANP32D	12	48856448	48876843	111	13	1.4172	0.078206
GATAD1	7	92066767	92098150	83	14	1.4165	0.07832
NUSAP1	15	41614892	41683248	208	28	1.4163	0.07835
WDR24	16	724622	750444	63	12	1.4155	0.07846
GRIN2B	12	13683165	14143053	2225	148	1.4154	0.078469
ETFB	19	51838423	51879672	171	26	1.4153	0.078488
VPS26A	10	70873268	70942617	296	23	1.415	0.07853
PCDH15	10	55552531	57397702	8757	285	1.4149	0.078545
B4GALNT2	17	47199822	47257351	244	37	1.4149	0.078548
PLA2G15	16	68269207	68304961	103	19	1.4143	0.078633
B3GAT3	11	62372768	62399647	56	15	1.4139	0.0787
LMAN2	5	176748563	176788853	98	19	1.4137	0.078723
KRTAP6-2	21	31960909	31981219	47	9	1.4131	0.078809
CAMKK2	12	121665497	121746111	266	41	1.4126	0.07888
LINGO2	9	27938076	28680283	3882	259	1.4126	0.078883
GSTO2	10	106018631	106074703	246	21	1.4124	0.078912
OR56A1	11	6037901	6058971	88	19	1.4123	0.078933
SLC25A20	3	48884369	48946426	98	22	1.4115	0.079046
ALDH5A1	6	24485080	24547435	397	46	1.4113	0.079081
RNF222	17	8284022	8311144	82	24	1.4112	0.079086
MRPL32	7	42961799	42998557	139	19	1.411	0.079117
TPD52L3	9	6318349	6341900	66	16	1.4105	0.079199
OR5I1	11	55692932	55713876	142	6	1.4086	0.079474
MUC17	7	100653353	100712020	210	35	1.4085	0.079488
ZNF34	8	145988499	146022730	134	15	1.4081	0.079551
C20orf202	20	1174098	1198918	105	15	1.4079	0.07958
LMO1	11	8235851	8300263	330	52	1.4077	0.079613
NEK7	1	198116093	198301550	745	39	1.4071	0.079692
HMHA1	19	1055922	1096627	218	45	1.4071	0.079697
LYSMD2	15	52005208	52053782	243	30	1.4066	0.079767
RPL19	17	37346536	37370980	62	18	1.4066	0.07977
UBAP1L	15	65375338	65417535	113	22	1.4064	0.079805
TBRG1	11	124482732	124515287	79	26	1.4063	0.079814
TRIM26	6	30142232	30191204	398	34	1.4062	0.07983
TEK	9	27099139	27240173	956	94	1.4049	0.08002
PPAPDC2	9	4652298	4675256	159	20	1.4048	0.080044
GIGYF1	7	100267130	100297071	74	22	1.4044	0.080106
ATF4	22	39905700	39928691	63	16	1.4041	0.080152
ENPP2	8	120559326	120695693	440	48	1.4037	0.080211
GBP5	1	89714633	89748544	76	20	1.4033	0.08026
SHROOM4	X	50324647	50567302	164	27	1.403	0.080309
GALR2	17	74060875	74083622	50	12	1.4029	0.080321
CPSF3	2	9553697	9623230	208	22	1.4027	0.080357
GLIS3	9	3814127	4358392	3113	256	1.4019	0.080476
OVOL3	19	36592104	36614613	84	21	1.4018	0.080485
PMFBP1	16	72136056	72220777	317	37	1.4015	0.080537
WDR65	1	43627820	43730029	480	40	1.4014	0.080541
IFIT5	10	91164343	91190758	136	31	1.4013	0.080567
ABCF1	6	30529153	30574956	208	31	1.4007	0.080651
HHLA1	8	133063733	133133406	399	51	1.4005	0.080682
COMMD8	4	47442885	47475736	105	17	1.3995	0.080828
DNAH14	1	225073964	225596996	2425	51	1.399	0.080914
PPA1	10	71952586	72003667	233	35	1.3977	0.081098
ZNF410	14	74343320	74409214	299	21	1.3973	0.081163
MFI2	3	196705492	196766687	258	55	1.3971	0.081186
ZBTB38	3	141033055	141178634	397	44	1.3965	0.081276
SPRR2B	1	153032700	153123927	393	33	1.3965	0.081287
BSN	3	49581922	49718978	266	28	1.3962	0.081334
OR10A4	11	6887856	6908850	124	15	1.3953	0.081466
KDM1B	6	18145560	18234084	410	48	1.395	0.081507
NFIX	19	13096422	13219610	263	29	1.395	0.081512
FAM200B	4	15673285	15717188	144	25	1.3942	0.081627
ABHD4	14	23057146	23091265	130	34	1.3938	0.081691
POLR2I	19	36594612	36616248	81	20	1.3928	0.081844
INPP5F	10	121475609	121598652	319	23	1.3926	0.081867
ALPK2	18	56138479	56306189	777	89	1.392	0.081959
ERLIN1	10	101899851	101958091	178	26	1.392	0.081966
UTRN	6	144596837	145184170	2198	101	1.3918	0.081988
SIRT1	10	69634427	69688147	185	25	1.3913	0.082068
SLC1A5	19	47268140	47301851	155	25	1.3905	0.082185
WBP2NL	22	42384729	42464460	298	28	1.3905	0.082185
CDKN1C	11	2894443	2917111	80	26	1.39	0.082262
HELLS	10	96295547	96383662	275	26	1.3899	0.082282
MTRNR2L5	10	57348750	57370488	73	13	1.3898	0.082298
EFHC1	6	52275106	52397892	535	48	1.3892	0.082388
KLF7	2	207928861	208041991	452	74	1.3886	0.082471
CETN3	5	89678078	89715603	84	25	1.3878	0.082598
C20orf141	20	2785633	2806479	98	22	1.3876	0.082629
C9orf24	9	34369017	34407830	107	25	1.3855	0.082957
OR8K1	11	56103421	56124507	90	14	1.3854	0.082965
DSE	6	116565336	116772424	766	61	1.3854	0.082972
TECPR2	14	102819300	102978818	570	28	1.3852	0.083001
TPPP3	16	67413712	67437438	61	14	1.3844	0.083123
NRK	X	105056536	105212602	208	27	1.3842	0.083145
COL28A1	7	7385834	7585484	1034	44	1.384	0.083177
OR8J1	11	56117691	56138764	106	16	1.384	0.083181
IFNA10	9	21196180	21217142	191	19	1.3838	0.083213
TMSB15A	X	101758604	101781712	33	12	1.3837	0.08323
RAI2	X	17808169	17889457	24	8	1.3835	0.083258
CARD16	11	104902053	104982158	348	29	1.3834	0.083266
LRRC38	1	13791445	13850543	288	52	1.383	0.083325
TMEM256	17	7296294	7317456	60	18	1.3828	0.083365
SRP72	4	57323081	57379839	185	17	1.3826	0.083386
ZNF71	19	57096632	57147849	233	45	1.3823	0.083439
DNASE1L2	16	2275817	2298712	53	15	1.3815	0.083558
RHOH	4	40182673	40258587	280	52	1.3813	0.083598
TRIM6-TRIM34	11	5607955	5675628	416	70	1.3807	0.083691
ITPK1	14	93393259	93592665	746	62	1.3806	0.083701
KIAA1210	X	118202598	118294542	86	18	1.3804	0.083739
DOCK5	8	25032238	25285598	881	82	1.3803	0.08375
C9orf64	9	86543226	86581901	123	25	1.3791	0.083939
ZMAT5	22	30116945	30173000	245	32	1.379	0.083943
LRIF1	1	111479807	111516701	98	19	1.379	0.083947
NUP210	3	13347737	13471809	485	30	1.3787	0.083994
GOLGA6L1	15	22726246	22756002	6	2	1.3786	0.08401
MMP16	8	89034237	89350254	1040	83	1.3776	0.084167
MFSD2A	1	40410802	40445638	106	31	1.3775	0.084186
RRNAD1	1	156688234	156716752	57	17	1.3772	0.084222
TAS2R16	7	122624759	122645754	85	18	1.3772	0.084224
ZNF441	19	11867815	11904893	167	15	1.377	0.08425
ANP32E	1	150180717	150218504	86	15	1.3762	0.084383
TMEM165	4	56252124	56329564	281	26	1.3755	0.084489
MAML1	5	179149851	179233512	316	34	1.375	0.084558
C20orf195	20	62174373	62198061	86	29	1.3749	0.084585
TSC22D1	13	44997655	45161283	452	33	1.3746	0.084621
PDCD7	15	65399717	65436174	91	15	1.3744	0.084659
SPRR2A	1	153018589	153040013	84	12	1.3743	0.084678
DEFB125	20	57891	87735	56	24	1.3739	0.084738
SAMD4A	14	55023815	55270033	820	139	1.3739	0.084742
CENPC	4	68327521	68421324	347	21	1.373	0.084873
GSAP	7	76930068	77055717	466	42	1.3729	0.084887
ZNF275	X	152589613	152635568	96	9	1.3729	0.084887
TNS4	17	38622080	38667849	153	33	1.3729	0.084897
MAD1L1	7	1845429	2282878	2742	59	1.3723	0.084982
MALL	2	110831447	110884143	66	16	1.3721	0.085014
OR4C16	11	55329604	55350536	165	15	1.3718	0.08506
GPR55	2	231762033	231835781	296	48	1.3714	0.085123
MEIS2	15	37171406	37403504	654	122	1.3713	0.085141
PLAG1	8	57063463	57133883	185	33	1.3705	0.08527
TAS1R1	1	6605241	6649817	163	21	1.3695	0.085416
SLC12A2	5	127409458	127535380	336	30	1.3693	0.085448
VN1R2	19	53751545	53775090	116	16	1.3692	0.085468
DESI2	1	244806237	244882335	221	33	1.3685	0.085575
SPATA6L	9	4543386	4676674	706	84	1.3682	0.085619
PRR14L	22	32062242	32156126	330	32	1.3677	0.085709
RBM41	X	106297650	106372057	142	16	1.3675	0.085741
KRTAP20-3	21	32005183	32025455	46	9	1.3673	0.085764
PBOV1	6	138527129	138549627	93	14	1.3667	0.085854
TRIM48	11	55019658	55048595	131	13	1.3655	0.086048
PYDC2	3	191168952	191189245	137	9	1.365	0.086123
PSEN2	1	227047885	227093806	233	39	1.3638	0.086308
OR7G3	19	9226688	9247626	133	11	1.3621	0.086576
CDK16	X	47067259	47099396	18	9	1.3619	0.086609
GPR42	19	35851831	35873855	107	19	1.3615	0.086683
IFNA1	9	21430440	21451315	92	25	1.3614	0.086694
LYL1	19	13199847	13223975	52	19	1.3611	0.086736
GCA	2	163165350	163238105	94	18	1.3608	0.086784
RIPK2	8	90759975	90813291	207	25	1.3605	0.086833
KLHDC7A	1	18797424	18822478	168	32	1.3597	0.086965
CAPG	2	85611871	85655555	187	29	1.3596	0.086975
NAIP	5	70254310	70330941	3	1	1.3591	0.087053
ESRRB	14	76766957	76978178	980	101	1.3591	0.087063
TCERG1	5	145816874	145901524	233	21	1.359	0.08707
WDR72	15	53795938	54065075	1344	60	1.3588	0.087099
CELF1	11	47477496	47597121	298	24	1.3585	0.08715
TCP11L1	11	33050963	33137489	381	22	1.3582	0.087194
LRRC41	1	46716868	46779280	110	32	1.3582	0.087196
NACAD	7	45110037	45138513	130	20	1.3578	0.08727
TEF	22	41753337	41805330	166	19	1.3566	0.08745
GRB10	7	50647760	50871159	914	55	1.3561	0.087535
ADAR	1	154544538	154610475	170	22	1.3559	0.087566
CXCL6	4	74692214	74724781	95	22	1.3558	0.087575
PAAF1	11	73577744	73648790	250	29	1.3558	0.087578
KATNAL2	18	44487455	44637658	545	36	1.3557	0.087603
CELA3B	1	22293514	22335135	318	21	1.3552	0.087681
HSD3B1	1	120039821	120067681	164	21	1.3549	0.087717
ZNF668	16	31062813	31083451	40	9	1.3545	0.087786
RB1CC1	8	53525016	53668403	288	47	1.3531	0.088015
CDS2	20	5097432	5188533	238	23	1.3526	0.088091
CD99L2	X	149924810	150077289	373	28	1.3521	0.088167
TXNDC17	17	6534078	6557861	107	14	1.352	0.088195
GEMIN8	X	14016398	14058012	84	12	1.3518	0.088227
HUS1	7	47725328	48029178	1544	102	1.3508	0.088385
PARG	10	51016325	51140715	130	17	1.3505	0.088423
NBL1	1	19957048	19994945	171	39	1.3504	0.088449
SPRR4	1	152933142	152955050	62	17	1.3501	0.08849
C16orf89	16	5084123	5126111	165	43	1.3499	0.088522
[truncated: 16,911 more rows]

[truncated: 17 more sheets: F1.27.GenesMAGMA.Prem, F1.28.Genes.MAGMA.PU, F1.29.GenesMAGMA.Persev, F1.30.GenesMAGMA.BIStotal, F1.31.GenesMAGMA.BISattentional, F1.32.GenesMAGMA.BISmotor, F1.33.GenesMAGMA.BISnonplanning, F1.34.S-PrediXcan_CNS_SS, F1.35.S-PrediXcan_CNS_Prem, F1.36.S-PrediXcan_CNS_PU, F1.37.S-PrediXcan_CNS_Persev, F1.38.S-PrediXcan_CNS_BIS_Total, F1.39.S-PrediXcan_CNS_BIS_Att, F1.40.S-PrediXcan_CNS_BIS_Motor, F1.41.S-PrediXcan_CNS_BIS_NonP, F1.42.S-PrediXcan_CNS_Drug-Exp, F1.43.Top10000-SNPs_UPPSP_SS]
