# Supplementary material
Source: HighWire-hosted journal article supplement (https://www.jneurosci.org/content/39/13/2562)
Supplement: inline-supplementary-material-73 [file inline-supplementary-material-73.xlsx]

## Sheet: F2.3.GenesMAGMA.NU
Figure 2-3. Results of gene-based association analyses for the GWAS of UPPSP Negative Urgency (Bonferroni results, P = 0.05/10674 = 4.68e-6, are highlighted in bold)
GENE	CHR	START	STOP	P
CACNA1I	22	39966758	40085742	1.5297e-07
MSRA	8	9911778	10286401	1.2765e-06
ZNF200	16	3272325	3286221	1.0994e-05
MEFV	16	3292028	3306627	4.794e-05
ZNF263	16	3313743	3351401	8.8273e-05
FCGR2B	1	161551101	161648444	0.00010558
MC2R	18	13882043	13915706	0.00013606
PLN	6	118869461	118881893	0.00016033
ADAM22	7	87563458	87832204	0.00021028
EIF3K	19	39109735	39127595	0.0002136
FANCG	9	35073832	35080013	0.0002299
MAP4K1	19	39078281	39109522	0.00024249
FCGR3A	1	161511549	161600917	0.00024903
VCP	9	35056061	35073246	0.00025519
FN1	2	216225163	216300895	0.00026241
TRIB1	8	126442563	126450647	0.00026894
FUBP3	9	133454352	133513739	0.00030505
RNF138	18	29671818	29711524	0.00031404
IGSF10	3	151143172	151176497	0.00031626
NINJ1	9	95883771	95896570	0.00034869
EPO	7	100318423	100321323	0.00037319
IFT88	13	21140585	21265503	0.00048741
FCGR2C	1	161551129	161575452	0.00057765
CCL27	9	34661877	34664045	0.00058408
THBS4	5	79287134	79379110	0.00059133
JUN	1	59246465	59249785	0.00060304
DPYSL4	10	134000404	134019280	0.00061752
HSP90AA1	14	102547075	102606036	0.00063908
SORBS1	10	97071528	97321171	0.00073969
ACTN4	19	39138289	39222223	0.00077646
POP7	7	100303676	100305118	0.00082502
GLRX5	14	95999840	96011061	0.00086214
MAB21L1	13	36047926	36050832	0.00092128
IL11RA	9	34650699	34661889	0.0010872
ZNF492	19	22817126	22850472	0.0010913
FCGR3B	1	161592986	161601753	0.0011284
DNAJB5	9	34989638	34998897	0.0011376
VWA5B1	1	20617412	20681387	0.0011415
RSL24D1	15	55473004	55489265	0.0011611
GJB6	13	20796110	20806534	0.0011763
OR1I1	19	15197791	15199032	0.0011937
SMARCD3	7	150935850	150974982	0.0012305
BUB1	2	111395275	111435691	0.0012408
ATP2C2	16	84402133	84497793	0.0012548
ZNF396	18	32946661	32957301	0.0012593
ATF3	1	212738676	212794119	0.0012687
CNGA3	2	98962618	99015064	0.0012806
SLC12A6	15	34525460	34630261	0.0014176
CAB39L	13	49882786	50018262	0.0014278
SLBP	4	1694527	1714282	0.001432
TACC3	4	1723227	1746898	0.0014441
PHF11	13	50069746	50103123	0.001448
ZNF500	16	4798240	4817625	0.0015055
SEPT11	4	77870856	77961537	0.0015072
MRI1	19	13875346	13885096	0.0016395
KCNK9	8	140613081	140715299	0.0016875
S1PR3	9	91606362	91619925	0.0017358
STEAP3	2	119981384	120023228	0.0017454
SIGMAR1	9	34634719	34637806	0.0017684
PAPPA2	1	176432307	176814735	0.0018398
IL17D	13	21276266	21297237	0.002014
OR9I1	11	57885972	57886916	0.0024608
MINK1	17	4736683	4801356	0.0025675
NDNL2	15	29560353	29562033	0.0025828
ANGPT4	20	853296	896977	0.0025903
ZNF20	19	12203658	12251222	0.0026229
PDGFRA	4	55095264	55164414	0.002715
CCL19	9	34689564	34691274	0.002814
SOSTDC1	7	16501106	16570205	0.0029866
PIGO	9	35088685	35096591	0.0030728
SLC17A6	11	22359643	22401049	0.0031401
LIMS1	2	109150857	109303702	0.0032389
ZNF419	19	57999079	58006048	0.0032426
IFIT2	10	91061712	91069033	0.0033014
CIDEA	18	12254318	12277594	0.0033976
TGM3	20	2276647	2321724	0.0034556
FGF10	5	44303646	44389808	0.0034993
COLEC12	18	319361	500722	0.0035373
CNN1	19	11649532	11661138	0.0035495
RILPL2	12	123899936	123921264	0.003584
CLDN23	8	8559448	8561616	0.003766
OR52E6	11	5862158	5863182	0.0037773
RAC3	17	79989500	79992080	0.0037849
CBLN2	18	70203915	70305756	0.0038877
DCTN3	9	34613548	34620515	0.0039124
CLEC12B	12	10163226	10171218	0.0040057
OR8B4	11	124293807	124294789	0.0040386
ADCY10	1	167778625	167883453	0.0042167
RBM17	10	6130950	6159420	0.0043375
THBS3	1	155165379	155178842	0.0043645
NTRK2	9	87283466	87638505	0.0044082
F5	1	169483404	169555826	0.0044207
HUNK	21	33245628	33416946	0.0044355
GALT	9	34638130	34651032	0.0044423
SRI	7	87834433	87856308	0.0045127
MYOZ2	4	120056939	120108944	0.0045263
ECSIT	19	11616731	11639989	0.0049137
AKT1	14	105235686	105262088	0.0051093
DRG2	17	17991200	18011285	0.0052529
KDR	4	55944644	55991756	0.0053761
SLC50A1	1	155107820	155111329	0.0055499
CST1	20	23728190	23731905	0.005581
VN1R1	19	57966542	57967854	0.0056268
CLEC9A	12	10183276	10218565	0.005645
ACTL6B	7	100240720	100254084	0.0056581
DAAM1	14	59655364	59838123	0.0057384
SETDB2	13	50018429	50069138	0.0058059
DEFB134	8	11850692	11853821	0.0058262
CLEC1B	12	10138241	10166023	0.0058629
EFNA1	1	155099936	155107333	0.0058791
DFFB	1	3773845	3801993	0.0059589
PFKFB3	10	6186881	6277495	0.0060256
HSPA2	14	65002623	65009955	0.0062405
UBAP1	9	34179003	34252521	0.0062497
HSPA8	11	122928197	122933938	0.0063522
CA9	9	35673853	35681156	0.0063578
KIAA1598	10	118643742	118886097	0.0063957
GRIK5	19	42502473	42573650	0.0063978
GNB2	7	100271154	100276797	0.0064935
KRTCAP2	1	155141884	155145951	0.0065061
KLRC4	12	10559983	10562356	0.0065736
LPIN1	2	11817721	11967535	0.0066144
CTAGE5	14	39734488	39856156	0.0066679
RHCE	1	25688740	25756683	0.0066722
RAB37	17	72666717	72743474	0.0067935
PSMB4	1	151372010	151374420	0.0068678
PCYT1A	3	195941093	196014828	0.0068737
GABRD	1	1950780	1962192	0.0069169
EDN3	20	57875482	57901047	0.0070515
PLK1	16	23688977	23701688	0.0070785
PRKACA	19	14202500	14228896	0.0070797
MPHOSPH9	12	123636867	123728561	0.0070887
MMP14	14	23305766	23318236	0.0071496
ZNF563	19	12428291	12444534	0.0071632
SCRG1	4	174305852	174327531	0.0074329
NRBF2	10	64893050	64914783	0.0074653
GRM6	5	178405328	178423207	0.0074781
KCNA7	19	49570675	49576198	0.0075783
UROC1	3	126200124	126236616	0.007689
ETFB	19	51848423	51869672	0.0077481
LILRB5	19	54754263	54761164	0.0078857
ERLIN2	8	37594117	37616619	0.0079027
ST6GALNAC5	1	77333126	77531396	0.007988
TCF15	20	584441	591042	0.0080165
TAF5	10	105127724	105148822	0.0081245
ABCA10	17	67143355	67240987	0.0081439
NUSAP1	15	41624892	41673248	0.0082102
LILRB3	19	54720147	54746602	0.0082888
SLC12A1	15	48483861	48596275	0.0084004
ZNF773	19	58011283	58029772	0.0084757
CTNNA3	10	67672276	69455927	0.0085236
TFR2	7	100218039	100240402	0.0086616
HBG2	11	5274420	5667019	0.0087119
OGFOD2	12	123459127	123464590	0.0087731
KIF4B	5	154393260	154397685	0.0088386
NID2	14	52471521	52535712	0.008871
OIP5	15	41601466	41624819	0.0089255
DPYSL5	2	27070615	27173219	0.0091563
ZNF24	18	32912176	32925446	0.0091876
OR52E8	11	5877904	5878964	0.0091917
CES1P1	16	55794460	55828070	0.0092097
MRPL52	14	23299088	23304246	0.0092226
ACOX1	17	73937588	73975515	0.0092974
OR52E4	11	5905501	5906527	0.0093515
MAPKAP1	9	128199672	128469513	0.0094434
ZBTB25	14	64915824	64971931	0.0094687
FZR1	19	3506271	3538328	0.0094824
NME4	16	446725	460367	0.0095696
MUC8	12	133049334	133050726	0.009572
MC5R	18	13824154	13826861	0.0096349
MCHR1	22	41074754	41078818	0.0096497
CXCL13	4	78432907	78532988	0.0096535
AIMP1	4	107236701	107270383	0.0096978
DPM3	1	155112367	155113071	0.0097071
CASKIN2	17	73496342	73511664	0.0098082
HDAC2	6	114254192	114332472	0.010033
COLEC11	2	3642426	3692048	0.010088
VAPB	20	56964178	57026157	0.010112
SLC46A1	17	26721661	26734215	0.010238
MMP16	8	89044237	89340254	0.010306
TMEM50A	1	25664408	25688852	0.010327
MTX1	1	155178490	155183615	0.010356
PCGF6	10	105062553	105110891	0.010388
XYLB	3	38388251	38462839	0.010638
RPS27A	2	55459039	55462989	0.010658
CAMK2D	4	114372188	114683083	0.010686
DPP10	2	115199876	116603328	0.010825
OR8B8	11	124310022	124311054	0.010996
CLDN3	7	73183328	73184600	0.011076
PEX1	7	92116334	92157845	0.011093
ADCY9	16	4003388	4166186	0.011133
GNAS	20	57414773	57486247	0.011165
ALDH1B1	9	38392661	38398658	0.011252
IL2RB	22	37521878	37571094	0.011255
VTI1A	10	114206756	114578503	0.011307
NOP10	15	34633917	34635378	0.011326
IVD	15	40697686	40728146	0.011353
OR5AU1	14	21623026	21624222	0.011476
KLRK1	12	10524952	10544473	0.011485
HRK	12	117293949	117319246	0.01149
SRD5A3	4	56212276	56239263	0.011599
PRR5-ARHGAP8	22	45098113	45258586	0.011603
SPRR1A	1	152956557	152958289	0.011615
MGAT4C	12	86372516	87232681	0.011663
MGAT3	22	39853349	39888199	0.011716
ABLIM3	5	148521046	148640105	0.011739
ARHGAP8	22	45098355	45258665	0.011742
SMAD2	18	45357922	45457515	0.011814
HADH	4	108910870	108956331	0.012073
SIT1	9	35649292	35650937	0.012105
DEPDC1B	5	59892739	59996017	0.012178
PLA2G2D	1	20438432	20446050	0.012246
SPACA3	17	31297394	31324895	0.012281
MUC1	1	155158300	155162707	0.012385
CLOCK	4	56294070	56413305	0.012389
P2RX2	12	133195366	133198972	0.012522
UNC13B	9	35161999	35405335	0.012545
PGLYRP2	19	15579456	15609767	0.012757
HTR5A	7	154862034	154877459	0.01288
CD48	1	160648536	160681641	0.012901
ARHGAP17	16	24930706	25026987	0.012986
TLN1	9	35696945	35732392	0.0131
GNPDA2	4	44684217	44728612	0.013112
SLC7A7	14	23242431	23299029	0.013199
MINPP1	10	89264632	89313217	0.013306
OR4K13	14	20502003	20502919	0.013329
GINS1	20	25388363	25433264	0.013664
CCNG1	5	162864575	162873157	0.013781
OR4L1	14	20528204	20529142	0.013811
MPG	16	127006	135852	0.013829
GRHPR	9	37422663	37436987	0.014014
POU2F2	19	42590263	42700737	0.014028
FUT2	19	49199228	49209207	0.014179
RPS9	19	54704610	54752862	0.014252
PRMT8	12	3490515	3703139	0.014339
FGF21	19	49258816	49261587	0.014457
PAK1	11	77032752	77185680	0.014523
CRYL1	13	20977806	21099996	0.014545
PRKAB2	1	146626685	146644129	0.01461
TAS2R60	7	143140546	143141502	0.014634
NKG7	19	51874860	51875969	0.014717
CHRNE	17	4801069	4806369	0.014926
ABCF2	7	150904923	150924316	0.014934
GP1BA	17	4835592	4838325	0.014941
VPS4A	16	69345259	69358949	0.015013
INA	10	105036920	105050108	0.015078
VPS36	13	52986737	53024763	0.01516
ADAM11	17	42836399	42859214	0.015227
ITPR2	12	26490342	26986131	0.015354
SYPL1	7	105730949	105753022	0.015355
CDH18	5	19473060	20575982	0.015415
LPCAT4	15	34651106	34659479	0.015449
DECR2	16	451826	462487	0.01551
PRPF18	10	13628927	13672868	0.01553
ADAMTS20	12	43747669	43945724	0.015548
TOLLIP	11	1295601	1330884	0.015817
PRKCSH	19	11546109	11561783	0.015829
CNTFR	9	34551430	34590121	0.015952
OR4K14	14	20482419	20483352	0.015991
TRA2B	3	185633694	185655924	0.016092
ZFP37	9	115800660	115819039	0.016094
SLC29A2	11	66129992	66139685	0.016098
PPM1G	2	27604061	27632554	0.016235
TXNDC2	18	9885763	9889272	0.016247
RNMT	18	13726659	13764557	0.016254
SNX17	2	27593389	27599995	0.016366
FGFR1OP	6	167412670	167466201	0.016499
MRPS10	6	42174539	42185603	0.016658
GC	4	72607410	72669758	0.016681
SNRNP70	19	49588676	49611862	0.016682
FBXL3	13	77566740	77601330	0.016817
CACNA2D4	12	1901123	2028002	0.017002
SUGT1	13	53226844	53275044	0.017059
S1PR1	1	101702444	101707074	0.017074
MYO15A	17	18012020	18083116	0.017161
IZUMO1	19	49244109	49250166	0.01723
DAPP1	4	100737990	100791311	0.017265
KIF20B	10	91461367	91534700	0.0173
MBIP	14	36767770	36789882	0.017311
PGD	1	10458649	10480201	0.017321
NTN5	19	49164664	49176338	0.017352
LRRC48	17	17876127	17920203	0.017416
AZI2	3	28356494	28390618	0.017516
CRYBB1	22	26995242	27014052	0.017582
GBA	1	155204243	155214490	0.017621
MRPS14	1	174979925	174992561	0.017652
OR10A5	11	6866883	6867936	0.017681
EIF2B4	2	27587219	27593353	0.017856
CHEK2	22	29083731	29138410	0.017969
OR56B4	11	6128914	6130065	0.018018
TPM4	19	16177831	16213813	0.018031
ZNF124	1	247285277	247335318	0.018145
CCK	3	42299317	42307699	0.018297
HMG20B	19	3572775	3579086	0.018314
B3GNT1	11	66112843	66115163	0.018321
KIF1B	1	10270863	10441661	0.018346
NRBP1	2	27650657	27665126	0.018364
MSI1	12	120779133	120806983	0.018419
UHRF2	9	6413151	6507054	0.01842
ZNF136	19	12273879	12300064	0.01848
VWC2L	2	215275789	215443683	0.018496
VILL	3	38029550	38048679	0.018526
ZNF354C	5	178487416	178510538	0.018601
SPRR3	1	152974223	152976332	0.018643
DEFB136	8	11831446	11832108	0.018739
ROBO3	11	124735282	124751366	0.018746
GAK	4	843064	926161	0.018795
LINGO1	15	77905369	78113242	0.018861
HNRNPA1L2	13	53191605	53217919	0.019227
LECT1	13	53277399	53313947	0.019237
ROBO4	11	124753587	124768396	0.019287
TNC	9	117782806	117880536	0.019393
VCL	10	75757872	75879918	0.019438
MUC5B	11	1244296	1283406	0.019438
HMOX2	16	4524691	4560348	0.019439
DBP	19	49133287	49140695	0.01957
OR52B6	11	5602107	5603114	0.019587
ARHGEF18	19	7459999	7537363	0.019599
DEDD2	19	42702750	42724292	0.019759
POLR3K	16	96407	103628	0.019819
ITPR3	6	33588142	33664351	0.019861
SLC6A20	3	45796942	45838027	0.020033
SYDE1	19	15218214	15225799	0.020072
BLK	8	11351510	11422113	0.020215
CRY1	12	107385142	107487607	0.020291
ZNF627	19	11670189	11729950	0.020344
MAP2K3	17	21187984	21218552	0.020376
TPM2	9	35681989	35691017	0.020393
GBE1	3	81538850	81811312	0.020407
OASL	12	121458095	121477045	0.020612
PAK2	3	196466728	196559518	0.020721
PCF11	11	82868030	82898493	0.02073
KIDINS220	2	8865408	8977760	0.020741
MMP13	11	102813724	102826463	0.020794
NFIL3	9	94171327	94186144	0.021008
BRSK2	11	1411129	1483919	0.021096
PIP4K2B	17	36921942	36956379	0.021248
AKAP5	14	64932217	64941221	0.021258
GTF2A1L	2	48844937	48960287	0.021262
ZNF211	19	58141761	58154147	0.02128
SEL1L	14	81937893	82000205	0.021301
LGALS1	22	38071615	38075813	0.021406
CAPZA2	7	116451124	116562103	0.02147
PCDHA8	5	140220907	140391929	0.0216
LEFTY1	1	226073982	226099082	0.021666
GTF3C2	2	27548716	27579868	0.02168
RPS19BP1	22	39925098	39928860	0.021687
PIWIL3	22	25115001	25170687	0.021876
BCL2L11	2	111876955	111926024	0.021877
PCDHA10	5	140235595	140391929	0.021961
DOHH	19	3490819	3500938	0.022271
PCDHA11	5	140248689	140391929	0.022273
MAD2L1BP	6	43597277	43608689	0.022291
NPS	10	129347613	129350935	0.022405
PYGB	20	25228705	25278650	0.022498
CEP135	4	56815037	56899529	0.022556
SYNCRIP	6	86318053	86353510	0.022599
OR52H1	11	5565719	5566779	0.02284
ZNF625	19	12251032	12267546	0.022989
CREB3	9	35732332	35737001	0.023005
RNASEH1	2	3592383	3606206	0.023054
MYL6	12	56551945	56557280	0.023181
EIF4E	4	99792835	99851788	0.0232
ERI1	8	8859657	8974256	0.02325
NMU	4	56461396	56502865	0.023317
MED7	5	156564423	156586030	0.023328
LEF1	4	108968701	109090112	0.023482
ERVW-1	7	92097694	92107300	0.023611
PLIN1	15	90207596	90222658	0.023638
IL33	9	6215805	6257983	0.023817
EED	11	85955586	85989855	0.023822
IFT172	2	27667238	27712656	0.023822
METAP2	12	95867296	95909615	0.023874
PPCS	1	42921788	42939056	0.023891
STEAP4	7	87905744	87936206	0.023936
AXIN1	16	337440	402673	0.02404
SNTB2	16	69221032	69342955	0.024206
STOML2	9	35099888	35103154	0.024212
PIP4K2A	10	22823778	23003484	0.024224
USH2A	1	215796236	216596738	0.024318
KLF4	9	110247133	110252763	0.024322
PCDHA6	5	140207563	140391929	0.024359
PCDHA7	5	140213969	140391929	0.024418
SLC47A1	17	19398698	19482347	0.02442
PLA2G1B	12	120759914	120765592	0.024434
WNK2	9	95947198	96082854	0.024522
HSPA6	1	161494036	161496681	0.02461
PLD1	3	171318195	171528740	0.024731
PCDH18	4	138440072	138453648	0.024978
JMJD1C	10	64926981	65225722	0.025018
CHMP4C	8	82644669	82671750	0.02502
RPGRIP1L	16	53631595	53737850	0.025034
PGGT1B	5	114546527	114598569	0.025052
MANBA	4	103552660	103682151	0.025133
LONP1	19	5691845	5720583	0.02525
ZNF300	5	150273954	150284545	0.025269
GAA	17	78075355	78093678	0.025297
CA11	19	49141199	49149569	0.025302
MCTP1	5	94039446	94620279	0.025671
GUCA1A	6	42123144	42147794	0.025749
ALCAM	3	105085753	105295744	0.02577
CTDSPL	3	37903451	38025960	0.02586
HERC4	10	69681665	69835105	0.0259
HSCB	22	29138019	29153503	0.025973
XPR1	1	180601140	180859387	0.025995
OR9Q1	11	57791353	57949088	0.026016
IL15RA	10	5990855	6020150	0.026054
AMIGO2	12	47469490	47473734	0.026084
OR51B6	11	5372738	5373676	0.026212
CHRM3	1	239549865	240078750	0.026309
BCL9	1	147013182	147098017	0.026319
PCOLCE2	3	142534764	142608045	0.026416
KRT83	12	52708085	52715182	0.026571
DYRK1A	21	38738092	38889753	0.02658
MARCKSL1	1	32799433	32801980	0.026666
PPIH	1	43124096	43142429	0.026762
RUVBL1	3	127783621	127872757	0.0268
ONECUT1	15	53049637	53083273	0.026994
RFFL	17	33333009	33416338	0.027065
NEIL2	8	11627148	11644855	0.027131
WFDC12	20	43752066	43753106	0.027252
LMOD1	1	201865580	201915715	0.027297
EPHA1	7	143087382	143105985	0.027317
ABCA6	17	67074843	67138029	0.027517
LALBA	12	48961467	48963849	0.027724
RSPH1	21	43892596	43916464	0.027897
GCKR	2	27719709	27746554	0.028089
SMARCC2	12	56556767	56583351	0.028167
LCN1	9	138413284	138418378	0.028236
COG7	16	23399814	23464501	0.028281
RHOT1	17	30469473	30580393	0.028321
EIF4E2	2	233414762	233448354	0.028362
PLA2G2F	1	20465819	20476879	0.028454
RNASE3	14	21359558	21360507	0.028578
H3F3B	17	73772515	73781974	0.028666
PCDHA5	5	140201222	140391929	0.028702
ANXA11	10	81910645	81965328	0.028736
OR51B2	11	5344541	5345582	0.028862
MTHFD1	14	64854749	64926722	0.028873
KIT	4	55524085	55606881	0.028988
SUGP1	19	19386827	19431653	0.029036
TMEM8B	9	35814448	35854844	0.029107
GBA2	9	35736863	35749983	0.029197
EEA1	12	93164413	93323107	0.029264
XRCC5	2	216972187	217071026	0.029299
BAI2	1	32192718	32230494	0.029314
HBE1	11	5289582	5526847	0.029549
THBS1	15	39873280	39891667	0.029591
DHODH	16	72042487	72058954	0.029601
FXN	9	71650175	71715094	0.029682
KATNB1	16	57769642	57791162	0.029756
GEMIN7	19	45582453	45594782	0.030034
TPM1	15	63334831	63364114	0.030094
KIF1C	17	4901243	4931696	0.030234
RAB27A	15	55495164	55611311	0.030323
GRAP2	22	40297086	40369725	0.030325
IMPA1	8	82570196	82598928	0.030458
USP6	17	5019733	5078329	0.0307
OR8B3	11	124266278	124267264	0.030702
ADHFE1	8	67342420	67383836	0.031067
ZNF649	19	52392477	52408293	0.031178
RPS7	2	3622795	3628509	0.031188
YBX1	1	43148098	43168020	0.031249
AMPD2	1	110158726	110174673	0.031354
ABCG5	2	44039611	44066004	0.031358
HINT2	9	35812957	35815351	0.031369
DCTN5	16	23652713	23681195	0.03137
KCNH7	2	163227917	163695240	0.031909
PCDHA3	5	140180783	140391929	0.031926
CD97	19	14491313	14519537	0.031961
CHPF2	7	150929575	150935908	0.031982
NPR2	9	35792151	35809729	0.032028
CDKN2B	9	22002902	22009362	0.032052
STK25	2	242432089	242449145	0.032106
PCDHA4	5	140186659	140391929	0.032117
SEMA3F	3	50192478	50226508	0.032163
PCDHA2	5	140174444	140391929	0.032186
GSTM4	1	110198703	110208118	0.032314
PDF	16	69362524	69364498	0.032351
NEUROD2	17	37759789	37766030	0.032503
IP6K3	6	33689444	33714762	0.032521
SEMG1	20	43835638	43838413	0.032588
SEMG2	20	43849941	43853099	0.032751
PLXNA2	1	208195587	208417665	0.032835
EPB41	1	29213603	29446553	0.032965
NTF4	19	49559050	49568333	0.032975
ZNF140	12	133656424	133684130	0.033006
ZNF613	19	52430400	52452012	0.033007
FBN2	5	127593601	127994878	0.033023
CDH13	16	82660408	83830204	0.033113
PYCR1	17	79890260	79900288	0.03313
TAB1	22	39795746	39833065	0.0332
ZNF197	3	44626380	44689963	0.033224
B4GALT4	3	118930579	118959950	0.033375
POLR2J2	7	102277496	102312088	0.033478
PDCD11	10	105156405	105206049	0.033572
FAM20A	17	66531254	66597530	0.033685
CRB3	19	6463788	6467232	0.033732
OR10A2	11	6890924	6891976	0.033743
RNASEH2C	11	65482367	65488418	0.033767
MLF1	3	158288952	158325041	0.033896
SLC25A17	22	41165634	41215403	0.033962
IDH3A	15	78423840	78464291	0.03397
RGS11	16	318300	325980	0.03402
FCAMR	1	207131310	207143970	0.034041
NMT1	17	43128978	43186384	0.034041
DERL3	22	24176690	24181315	0.034106
PLD4	14	105391153	105399574	0.034114
OR51B5	11	5363744	5364809	0.034169
SPSB4	3	140770244	140867453	0.034239
AATF	17	35306175	35414171	0.03424
EPS15	1	51819935	51985000	0.034247
PTK2B	8	27168999	27316903	0.034268
NT5C	17	73126320	73127890	0.034285
PI3	20	43803517	43805185	0.034326
SV2C	5	75378997	75649764	0.034472
RYR1	19	38924339	39078204	0.034478
VRK1	14	97263641	97398059	0.03508
PCDHA1	5	140165876	140391929	0.035109
RCC1	1	28832455	28865812	0.035141
LY75	2	160628362	160761260	0.035163
GRAMD4	22	46971909	47075688	0.03519
VDAC1	5	133307606	133340824	0.035249
CASP1	11	104896170	104972158	0.035482
SULF1	8	70378859	70573150	0.03552
PLEK2	14	67853700	67878917	0.035525
GNAT1	3	50229045	50233949	0.035595
KLRC2	12	10579453	10594899	0.035604
RIN1	11	66097713	66104311	0.035841
ASF1A	6	119215384	119230332	0.035882
CKM	19	45809672	45826235	0.035893
RMI1	9	86595626	86618985	0.036038
OR1F1	16	3254247	3255188	0.036244
PXN	12	120648250	120703574	0.036468
KIF23	15	69706585	69740764	0.036471
DNAJC19	3	180701497	180707562	0.036555
NTNG2	9	135037334	135119921	0.036611
CNOT6L	4	78634541	78740769	0.036625
GATA4	8	11534468	11617511	0.036644
MECR	1	29519385	29557454	0.036648
EHMT1	9	140513444	140764468	0.036833
PDGFD	11	103777914	104035107	0.036926
STX18	4	4417469	4544073	0.036926
DST	6	56322785	56819426	0.037073
COLEC10	8	120007691	120118821	0.037101
FBXO27	19	39481354	39523425	0.037179
GTPBP2	6	43573053	43596899	0.037272
SIRT4	12	120740119	120751052	0.037368
SGCG	13	23755091	23899304	0.037505
KCNS1	20	43720951	43729753	0.037509
NPB	17	79858621	79860781	0.037787
TPK1	7	144149034	144533488	0.037826
ERMAP	1	43282795	43310660	0.038072
EPHA4	2	222282747	222438922	0.0381
RFX5	1	151313116	151319833	0.038105
ABCG8	2	44066103	44105605	0.038327
LTBP1	2	33172039	33624576	0.038346
CA4	17	58227297	58248260	0.038353
PPP1R1A	12	54969171	54982443	0.038489
COG8	16	69354043	69373570	0.038524
CLDN4	7	73213872	73247014	0.038531
OTOR	20	16729003	16750707	0.038642
POLR3B	12	106751436	106903976	0.038663
MRPL42	12	93861264	93897545	0.038897
CYP2W1	7	1022835	1029276	0.039089
PAG1	8	81880045	82024303	0.039208
PLA2G4D	15	42359207	42386752	0.039214
FUT1	19	49251268	49258647	0.039613
DDX11	12	31226779	31257725	0.039661
TUBB3	16	89985573	90002500	0.039728
GNAT2	1	110145889	110155679	0.039743
RTP4	3	187086120	187089864	0.039776
KLC3	19	45836692	45854778	0.039834
SPRR1B	1	153003678	153005376	0.039898
OR51S1	11	4869427	4870514	0.040046
PPP1R1B	17	37782993	37792879	0.040093
NMNAT2	1	183217372	183387737	0.040101
ARL8A	1	202102532	202113869	0.040132
ATOH1	4	94750042	94751221	0.040171
ADAP1	7	937540	995043	0.040174
PLBD1	12	14656595	14721283	0.040625
ITK	5	156569944	156682201	0.040632
HLA-K	6	29894236	29897009	0.040762
ZNF560	19	9577183	9609283	0.040917
KLRC1	12	10594863	10607284	0.040998
STK24	13	99102455	99230194	0.041022
KLF7	2	207938861	208031991	0.041024
DNAJC1	10	22045466	22292698	0.041073
CDH12	5	21750782	22853731	0.041079
FLAD1	1	154955814	154965587	0.04109
KLRC3	12	10564911	10573194	0.041406
PTPRU	1	29563028	29653325	0.041425
ABCB1	7	87133175	87342611	0.041435
MNAT1	14	61201460	61436671	0.041531
CDKN2A	9	21967751	21995300	0.041552
ANXA3	4	79472673	79531597	0.041778
SLC9A9	3	142984064	143567373	0.041782
FOXN3	14	89591215	90085493	0.041849
LDLRAP1	1	25870071	25895377	0.041879
ZXDC	3	126156444	126194762	0.041884
IDO2	8	39792133	39873910	0.041888
RCBTB1	13	50106082	50159719	0.041994
GYS2	12	21689123	21757781	0.042003
UBE2F	2	238875469	238951236	0.042081
SALL4	20	50400581	50419059	0.042141
SCLY	2	238969530	239008054	0.042425
NLRP14	11	7041677	7092539	0.042481
PYCR2	1	226107578	226111978	0.042492
SDC2	8	97505579	97624000	0.042874
NUP214	9	134000948	134110057	0.043033
MBOAT7	19	54677107	54693733	0.043061
PEX11A	15	90220995	90234014	0.043135
ERBB2	17	37844167	37886679	0.043234
OR51M1	11	5410607	5411664	0.043348
COL9A3	20	61447596	61472511	0.043371
CIRH1A	16	69165194	69265033	0.043464
UCP1	4	141480588	141489959	0.043535
TLR3	4	186990306	187009223	0.043573
FGFR3	4	1795034	1810599	0.043787
CCL21	9	34709002	34710121	0.04395
AIPL1	17	6297013	6338519	0.043988
ELANE	19	851014	856242	0.04406
CFD	19	859453	863453	0.044124
OR6M1	11	123676043	123677095	0.044497
NCAM1	11	112831997	113149158	0.044596
CCDC19	1	159842154	159869953	0.044641
MYL1	2	211154874	211179914	0.044672
PCDHAC1	5	140306302	140391929	0.044691
PRTN3	19	840963	848175	0.044703
NAP1L1	12	76438670	76478813	0.044742
TUBA1C	12	49582519	49667114	0.044775
SMARCB1	22	24129150	24176703	0.045215
GOPC	6	117639374	117923691	0.045246
DMAP1	1	44679127	44686353	0.04529
CST2	20	23804406	23807368	0.045315
TRPV1	17	3468738	3500392	0.045784
DOPEY2	21	37529080	37666572	0.045913
TNRC6B	22	40440821	40731812	0.045937
RXFP1	4	159236463	159574524	0.045986
GRID1	10	87359312	88126250	0.046126
ZNF214	11	7020549	7041599	0.046249
IL5	5	131877136	131892530	0.046283
DICER1	14	95552565	95624347	0.04629
PPP1R3B	8	8993765	9009084	0.046325
ABI2	2	204192942	204312446	0.046452
APITD1	1	10490159	10512210	0.046509
CHST13	3	126243126	126262134	0.046669
CRYBA4	22	27017928	27026636	0.046703
SIVA1	14	105219437	105234831	0.046812
PFN1	17	4848947	4852356	0.047153
FBXW4	10	103370423	103455052	0.047161
FES	15	91426925	91439006	0.047481
LENEP	1	154966062	154966791	0.047484
PRSS1	7	142457319	142460923	0.047572
YTHDF3	8	64081112	64125346	0.04761
ZNF266	19	9523272	9546254	0.047644
DSG2	18	29078006	29128971	0.04767
IL2RA	10	6052652	6104288	0.047711
DNAJB1P1	2	192745908	192746931	0.047747
STAB2	12	103981051	104160505	0.047938
FAN1	15	31196055	31235311	0.048055
ARNTL	11	13298199	13408813	0.048211
CST6	11	65779312	65780976	0.048313
CYP17A1	10	104590288	104597290	0.04832
RPLP1	15	69745123	69748255	0.048328
CASP5	11	104864962	104893895	0.048404
MAFG	17	79876146	79885590	0.04854
ZNF641	12	48733791	48745197	0.048611
SPIRE1	18	12446511	12658133	0.048645
RPH3AL	17	62293	236045	0.048665
ABCB9	12	123405498	123466196	0.048713
STX16	20	57226328	57254582	0.048765
ANAPC11	17	79848666	79858867	0.048872
ZNF436	1	23685941	23695935	0.048891
FAM19A1	3	68053359	68594776	0.048951
RAB8A	19	16222439	16245044	0.048992
PPP1R12B	1	202317827	202561834	0.049022
PDE6A	5	149237519	149324356	0.049068
COG2	1	230778235	230829728	0.049262
ARHGDIA	17	79825597	79829282	0.049342
WARS2	1	119573839	119683294	0.04973
POLR3D	8	22102617	22112113	0.049749
HMMR	5	162887209	162918947	0.049755
CD5L	1	157800704	157868046	0.049772
GUCA1B	6	42152139	42162654	0.049813
GGA1	22	38004481	38029571	0.049862
MVP	16	29831715	29859355	0.049926
INTS3	1	153700543	153746555	0.050011
CASP4	11	104813593	104840163	0.050044
FUT8	14	65877310	66210839	0.050188
PDE9A	21	44073746	44195619	0.050204
GSTM2	1	110210644	110252171	0.05025
MKRN1	7	140152840	140179369	0.050297
CERS2	1	150933059	150947479	0.050314
GJA8	1	147374946	147381393	0.050353
ATP10B	5	159990127	160279221	0.050375
MOBP	3	39508689	39570970	0.050407
POLR2J	7	102113565	102119354	0.050462
OR52D1	11	5509915	5510979	0.050662
TPST1	7	65670186	65885530	0.050879
DBT	1	100652475	100715390	0.050893
COL9A2	1	40766159	40783488	0.050928
MYL6B	12	56546040	56553431	0.051316
GJA1	6	121756838	121770873	0.051347
TNNI1	1	201373625	201398994	0.051455
ATP1A3	19	42470734	42501649	0.051476
AP4S1	14	31494312	31562818	0.05148
NCR2	6	41303393	41318625	0.051502
KTN1	14	56025790	56168244	0.051543
TMEM98	17	31254928	31272124	0.051592
SLA2	20	35240721	35274619	0.051647
GALNT3	2	166604101	166651192	0.051767
IPO9	1	201798269	201853422	0.051768
POLR2B	4	57843888	57897334	0.051909
CLN5	13	77564795	77576652	0.052042
RAD50	5	131891711	131980313	0.052076
MRPS30	5	44809027	44820530	0.052361
MSH2	2	47630108	47789450	0.052389
PSG3	19	43225790	43244721	0.052564
SLC23A1	5	138702885	138720242	0.052581
S100Z	5	76145826	76217475	0.052746
OR51L1	11	5020213	5021160	0.052822
PLA2G5	1	20354672	20417683	0.052826
C4BPA	1	207277607	207318317	0.052951
SQRDL	15	45923346	45983492	0.052956
CREBBP	16	3775055	3930727	0.052974
PDE11A	2	178487980	178973066	0.053035
ABT1	6	26597180	26600278	0.053106
TOP1	20	39657458	39753127	0.053249
CD72	9	35609530	35646807	0.053294
PNMT	17	37824234	37826728	0.053298
DCTN4	5	150088002	150138671	0.053363
RABGEF1	7	66147151	66276451	0.053764
HOXB2	17	46618256	46623441	0.053796
OR5H6	3	97983088	97984200	0.053804
TBPL2	14	55880259	55923444	0.053812
GPS1	17	80008567	80015346	0.053978
AKTIP	16	53524952	53538323	0.054026
ZNF35	3	44690219	44702283	0.054248
GTF3C4	9	135545422	135570342	0.05425
HNRNPK	9	86582998	86595569	0.05431
SHC1	1	154934774	154946871	0.054421
CDC42BPA	1	227177566	227506175	0.054555
RNF125	18	29598335	29653176	0.054588
GLI1	12	57853918	57866045	0.05481
ARL3	10	104433488	104474164	0.055019
GABRR1	6	89887220	89940997	0.055097
RPA1	17	1732996	1803376	0.055346
P4HB	17	79801035	79818570	0.055412
ABCC1	16	16043434	16236931	0.055501
OR4K15	14	20443603	20444818	0.055542
BRDT	1	92414928	92479983	0.05559
LMO4	1	87794151	87814606	0.055665
PRDX3	10	120927215	120938345	0.055712
UBE2N	12	93799449	93836038	0.056205
CA12	15	63613577	63674360	0.056281
RBX1	22	41347351	41369313	0.05635
HOXB1	17	46605888	46608359	0.056381
ITPKA	15	41785591	41795747	0.056464
CLEC12A	12	10103915	10148293	0.056538
ZNF445	3	44481262	44519162	0.056692
ACOT12	5	80625824	80689998	0.056787
ST13	22	41220539	41253026	0.056971
CYP4A11	1	47394849	47407156	0.057154
SLC19A2	1	169433147	169455241	0.057169
PANK1	10	91342745	91405215	0.057232
STK11	19	1189406	1228428	0.057248
OR10A4	11	6897856	6898850	0.057436
MAN2A2	15	91445448	91465814	0.057439
PLCL1	2	198669426	199437305	0.057482
MEGF9	9	123363091	123476748	0.057536
HBZ	16	202686	204502	0.057596
HCN3	1	155247374	155259639	0.057667
CHML	1	241792155	241799232	0.057989
USP2	11	119225925	119252436	0.057994
PPIAP22	21	20230097	20230594	0.058028
KDM1A	1	23345941	23410182	0.058071
AFAP1L2	10	116054583	116164515	0.058182
MUC12	7	100612904	100662230	0.058188
GRB7	17	37894180	37903544	0.058214
C1QTNF5	11	119209652	119217383	0.058305
MFRP	11	119209652	119217383	0.058305
CCR10	17	40830907	40835935	0.05835
SLC11A2	12	51373184	51422349	0.058577
GLUL	1	182350839	182361341	0.058642
TREH	11	118528026	118550399	0.058691
NKX2-1	14	36985602	36990354	0.058751
GPM6A	4	176554085	176923815	0.058883
TTC25	17	40086888	40117648	0.058884
CUL1	7	148395006	148498128	0.058906
SREBF1	17	17713713	17740325	0.059062
CEACAM1	19	43011456	43065386	0.059076
ABCC10	6	43395104	43418168	0.059076
DEC1	9	117904097	118164923	0.059215
HP	16	72088491	72094954	0.059286
STAMBP	2	74056086	74100786	0.059729
CHST14	15	40763160	40765353	0.059751
GPHN	14	66974125	67648520	0.059796
KCNK16	6	39282474	39290744	0.059885
BACE2	21	42539728	42654445	0.059959
TAF4B	18	23805900	23971649	0.060046
AS3MT	10	104629273	104661656	0.060063
ATP6V0A2	12	124196865	124246302	0.060113
ASB7	15	101142739	101191910	0.060347
XAF1	17	6658766	6678966	0.060449
BTLA	3	112182815	112218408	0.060605
LPHN1	19	14260750	14316999	0.060642
HYI	1	43916824	43919660	0.060676
GNAI3	1	110091233	110136975	0.060861
AURKAIP1	1	1309110	1310875	0.061096
GPR4	19	46093022	46105466	0.061101
GNA13	17	63006833	63052957	0.061199
DHRS4L2	14	24439148	24475617	0.061222
MAPRE2	18	32556892	32723434	0.061561
PLA2G2A	1	20301925	20306932	0.061616
RASAL1	12	113536624	113574044	0.061764
MLN	6	33762450	33771788	0.061951
CPA3	3	148583043	148614983	0.062026
FBXO3	11	33762485	33796089	0.062027
PLCD3	17	43186335	43210721	0.062057
CCNE1	19	30302805	30315215	0.062206
DFFA	1	10516579	10532583	0.062239
SSR1	6	7268539	7347679	0.062325
SRSF4	1	29474255	29508499	0.062387
ST8SIA1	12	22216707	22589975	0.06255
SARDH	9	136528682	136605077	0.062586
CARD6	5	40841286	40860275	0.062707
C6	5	41142336	41261540	0.063084
RPL18	19	49118585	49122793	0.063169
OR4C15	11	55321783	55322895	0.063171
SFTPD	10	81697496	81742370	0.063247
SART1	11	65729160	65747299	0.0634
ARFIP1	4	153701089	153839615	0.063409
LRRC4C	11	40135753	41481323	0.063411
IDUA	4	980785	998316	0.063504
MGRN1	16	4666494	4740975	0.063659
PAPOLA	14	96967770	97033448	0.06367
ALOX5	10	45869661	45941561	0.063843
PTPN7	1	202116141	202130716	0.063958
DYNC1H1	14	102430865	102517129	0.064031
BRPF1	3	9773413	9789702	0.064094
SCAMP3	1	155225770	155232221	0.064199
TUBA1A	12	49578579	49583107	0.064228
CNP	17	40118759	40129749	0.064269
FXYD3	19	35606732	35615228	0.064306
ENO3	17	4851387	4860426	0.064385
CACNB2	10	18429606	18830798	0.064536
MKL2	16	14165178	14360630	0.064586
PPP2R4	9	131873229	131911225	0.064647
PRR5	22	45064593	45133561	0.064666
ROS1	6	117609463	117747018	0.064862
MPV17	2	27532360	27548547	0.064914
SLC9A3R1	17	72744791	72765492	0.065058
PGM5	9	70943224	71145977	0.065097
QSOX1	1	180123969	180173165	0.065129
SEMA6D	15	47476298	48066420	0.065214
RPRM	2	154333852	154335322	0.065331
CCDC130	19	13842574	13874110	0.065438
SOX12	20	306207	310865	0.065508
CNTNAP1	17	40834631	40851832	0.065596
CYTH3	7	6201407	6312275	0.065708
TRPC1	3	142442916	142526730	0.065801
LYST	1	235824341	236046940	0.065967
RAB11A	15	66018392	66184329	0.066128
CYP4A22	1	47603107	47615413	0.066134
TSSK3	1	32817122	32829913	0.066293
RABEP1	17	5185558	5289129	0.066526
CPE	4	166282346	166419472	0.066566
CRAT	9	131857089	131873468	0.066599
MATN4	20	43922085	43937169	0.066734
SEC61A1	3	127770484	127790526	0.066734
OR4C16	11	55339604	55340536	0.066892
LPGAT1	1	211916799	212004114	0.067048
NRG1	8	31496902	32622548	0.067055
DBF4	7	87505531	87538856	0.067128
SUMO2	17	73163408	73179078	0.067263
IL10	1	206940947	206945839	0.067374
SIRPG	20	1609798	1638425	0.067392
RPL37	5	40825364	40835437	0.067528
CASP14	19	15160195	15169104	0.067563
SIRT7	17	79869815	79879199	0.067824
SH3BP4	2	235860617	235964358	0.067984
TNFRSF13B	17	16832849	16875432	0.068001
GP9	3	128779610	128781249	0.068113
BMP2	20	6748311	6760927	0.06821
CLTB	5	175819456	175843570	0.068216
OR51T1	11	4903049	4904113	0.068339
ZNF561	19	9715356	9732075	0.06851
PRKRIR	11	76061000	76092015	0.068716
CAMKK2	12	121675497	121736111	0.068832
BLMH	17	28575218	28619074	0.068885
CBFA2T3	16	88941266	89043612	0.068916
ISYNA1	19	18545198	18549111	0.069099
CST4	20	23666277	23669677	0.069183
ILKAP	2	239079042	239112370	0.069191
MARS	12	57869228	57911352	0.069219
PSMB2	1	36067185	36107445	0.069227
POMZP3	7	76239303	76256578	0.069305
PINX1	8	10622473	10697394	0.069385
FMO5	1	146646930	146714700	0.069438
ATP11A	13	113344643	113541482	0.069552
FOS	14	75745477	75748933	0.069632
SMPD3	16	68392231	68482591	0.069681
SASS6	1	100549119	100598511	0.069846
GRK5	10	120967101	121215131	0.070086
INHBE	12	57846106	57853063	0.070124
E2F2	1	23832922	23857712	0.070185
GALK1	17	73747675	73761792	0.070203
ZNF441	19	11877815	11894893	0.070444
PRDX6	1	173446405	173457946	0.070495
BANF1	11	65769550	65771620	0.070524
TMEM126A	11	85359011	85367591	0.070575
CLK2	1	155232659	155248282	0.070665
H6PD	1	9294834	9331396	0.070715
LIPE	19	42905659	42931578	0.070783
SLC13A2	17	26800311	26824799	0.070832
OR5H2	3	98001732	98002676	0.070889
IVL	1	152881021	152884362	0.07095
GPX3	5	150400124	150408554	0.071084
CD248	11	66081958	66084515	0.071103
ATG7	3	11313995	11599139	0.071124
BEST1	11	61717293	61732987	0.071153
ACER2	9	19408925	19452018	0.071347
PLCD1	3	38048987	38071253	0.071431
S100A9	1	153330330	153333503	0.071487
CDK3	17	73996987	74002080	0.071625
BTN1A1	6	26501449	26510650	0.071683
ROBO1	3	78646390	79816965	0.071703
NRG2	5	139226364	139422884	0.071819
UBE2D3	4	103715540	103790053	0.071994
CGB8	19	49550895	49552400	0.072045
ESRRB	14	76776957	76968178	0.072064
MNX1	7	156786745	156803345	0.072206
DGKH	13	42614176	42830714	0.072408
HIST1H1E	6	26156559	26157343	0.072582
MIA3	1	222791428	222841354	0.072587
LARS	5	145492601	145562223	0.072618
CXCL12	10	44793038	44881941	0.072619
RAB3GAP1	2	135809835	135933964	0.072681
GPRC6A	6	117113248	117150200	0.072701
PALB2	16	23614488	23652631	0.072747
CXCL1	4	74735110	74736959	0.072758
NPTN	15	73852355	73926475	0.072854
BATF	14	75988768	76013358	0.073084
CTSV	9	99794940	99801925	0.073174
AMDHD2	16	2570358	2581423	0.073283
POLH	6	43543887	43586701	0.073375
HPS1	10	100175955	100206684	0.073408
AFTPH	2	64751465	64820139	0.073743
GMPR	6	16238811	16295780	0.073847
DNAJB13	11	73661364	73681411	0.073859
H1FNT	12	48722763	48724062	0.073929
DHRS4	14	24422795	24438488	0.073938
ETNK2	1	204100190	204121307	0.074014
GFRA2	8	21547915	21669869	0.074046
SPRR2B	1	153042700	153113927	0.074217
DEFB135	8	11839830	11842099	0.074374
RPL23	17	37004118	37010096	0.074496
SLIT3	5	168088745	168728133	0.074574
SLC38A3	3	50242679	50258411	0.074821
ANXA9	1	150954493	150968110	0.074911
SLC29A3	10	73079015	73123142	0.075026
STARD3	17	37793318	37819737	0.075187
OR10G2	14	22101992	22103096	0.075231
NUP54	4	77035812	77069668	0.075296
PSMC2	7	102984701	103009842	0.075454
GJD3	17	38517235	38520067	0.075492
ST3GAL1	8	134467091	134584183	0.075532
BLOC1S1	12	56109820	56113871	0.075615
OR7E24	19	9361606	9362820	0.075645
GSTM1	1	110230436	110251661	0.075658
BARD1	2	215590370	215674428	0.075678
UBE4B	1	10092890	10241297	0.075872
KCNAB1	3	155755490	156256545	0.076077
ALDH9A1	1	165631453	165668100	0.076178
ZBTB38	3	141043055	141168634	0.0762
OR11G2	14	20665495	20666605	0.076345
OR4C11	11	55370830	55371874	0.076365
GALNT8	12	4829507	4960277	0.076396
TPI1	12	6976283	6980112	0.076428
NINL	20	25433341	25566153	0.07648
GPCPD1	20	5525085	5591672	0.076642
PCDHAC2	5	140345820	140391936	0.076725
SRRM1	1	24958207	24999758	0.076738
PDIA2	16	333152	337215	0.076869
PRUNE	1	150980896	151008189	0.077061
ZNF519	18	14057456	14132489	0.077091
SYNE1	6	152442819	152958936	0.077192
EMILIN1	2	27301435	27309271	0.077475
ATAD5	17	29158988	29222887	0.077611
KCNH5	14	63173287	63568755	0.077626
FZD4	11	86656721	86666433	0.077727
TNFRSF4	1	1146706	1149518	0.077746
SIRPB1	20	1544167	1600707	0.077774
WDR33	2	128458596	128568761	0.077892
INSIG1	7	155089486	155101945	0.077974
GLYAT	11	58407899	58499447	0.078106
AGL	1	100315640	100389579	0.078241
TAF2	8	120743015	120845103	0.078291
TRMT11	6	126307576	126360422	0.078306
ADAM10	15	58887403	59042177	0.078491
CELA1	12	51722227	51740463	0.0785
UPP2	2	158733214	158992666	0.078763
HDAC11	3	13521224	13547916	0.078786
IFNK	9	27524312	27526496	0.078829
CBLB	3	105374305	105588396	0.078909
NPFFR2	4	72897521	73013784	0.079
POU2F1	1	167190066	167396582	0.079134
RDH5	12	56114151	56118489	0.079168
KHK	2	27309615	27323640	0.079174
SFTA3	14	36942493	36983034	0.079191
SERGEF	11	17809595	18034709	0.079482
FAM175A	4	84382092	84444501	0.079484
DCN	12	91539025	91576900	0.079493
PTTG2	4	37962056	37962746	0.079507
STAT1	2	191829084	191885686	0.079543
FXR1	3	180585929	180700541	0.079675
TWF1	12	44187526	44200178	0.079724
VTN,SEBOX	17	26691290	26700110	0.079768
BMP3	4	81952119	81978685	0.079769
PDCD6IP	3	33839844	33911194	0.079921
KIF3C	2	26149471	26205618	0.079984
PTF1A	10	23481256	23483181	0.080029
CISD2	4	103790135	103810399	0.080146
COX8C	14	93813537	93814702	0.080167
CRLF3	17	29096406	29151794	0.080191
STAM2	2	152973315	153032506	0.080285
RANBP3	19	5916150	5978153	0.080339
DRD4	11	637293	640706	0.080394
AGT	1	230838269	230850043	0.080409
PDZK1	1	145726918	145764074	0.080418
AGPAT6	8	41434706	41482520	0.080421
HMSD	18	61616535	61649008	0.080466
CLDN14	21	37832919	37948867	0.080491
IRF7	11	612553	615999	0.080653
PRH2	12	11081835	11084940	0.080767
TUBG2	17	40811323	40819024	0.080805
SLC5A3	21	35445870	35478559	0.080833
FGF22	19	639879	643703	0.080979
ASB8	12	48541571	48574996	0.081026
OR4A5	11	51411378	51412448	0.081176
EPS15L1	19	16466050	16582896	0.081308
ACTR1A	10	104238986	104262482	0.081352
GALNT13	2	154728426	155310361	0.081354
OR56A3	11	5968570	5969591	0.081595
MSMO1	4	166248775	166264312	0.081681
ARHGAP9	12	57866038	57882597	0.08177
HAPLN4	19	19366450	19373605	0.081823
CRTC1	19	18794487	18893004	0.081876
HIST1H2AC	6	26124373	26139344	0.081885
CDK10	16	89747145	89762772	0.082164
PSAP	10	73576055	73611126	0.0822
ARSJ	4	114821440	114900883	0.082317
CDC42EP4	17	71279763	71308314	0.082444
XPO5	6	43490072	43543812	0.082482
MED27	9	134735494	134955295	0.082611
ZNF318	6	43274872	43337216	0.082672
BCL2A1	15	80253231	80263788	0.082681
FBXO17	19	39432044	39466550	0.082745
ZNF426	19	9638667	9649303	0.082745
HIST1H2BC	6	26115101	26124154	0.082793
TGFBR1	9	101866320	101916474	0.082878
CSNK2A2	16	58191811	58231824	0.083072
ELAVL2	9	23690102	23826335	0.083476
ADAP2	17	29233362	29286340	0.083509
TM4SF4	3	149191761	149221068	0.08353
ZCCHC7	9	37120536	37358146	0.083539
LYPLA2	1	24117460	24122029	0.083556
ADAMTS6	5	64444563	64777747	0.0836
B3GALT6	1	1167629	1170421	0.083846
ZC3HC1	7	129658126	129691291	0.084042
UBE2W	8	74692332	74791145	0.084045
RBAK	7	5085452	5109119	0.084213
LILRB4	19	55155340	55181810	0.084342
LAMA2	6	129204342	129837714	0.084356
VTI1B	14	68113792	68141548	0.084359
GEMIN5	5	154266976	154317769	0.084386
OR10AD1	12	48596081	48597170	0.084945
HIST1H1T	6	26107640	26108364	0.085033
COL6A3	2	238232646	238323018	0.085127
RNF32	7	156432975	156469824	0.085345
OR10H1	19	15917817	15918936	0.085429
SIRT1	10	69644427	69678147	0.085647
KAT5	11	65479467	65487075	0.085661
SPRR2D	1	153012201	153014407	0.085762
CGN	1	151482986	151511168	0.085901
NDRG3	20	35280169	35374481	0.085992
TGFB2	1	218519577	218617961	0.086003
RDH12	14	68168603	68201169	0.08601
POLE2	14	50110273	50155140	0.08607
SSTR5	16	1122756	1131454	0.086155
PDX1	13	28494157	28500368	0.086281
TAS2R13	12	11060525	11062161	0.086366
POU3F3	2	105471969	105476929	0.086449
NGF	1	115828539	115880857	0.086546
IRAK3	12	66582659	66648402	0.086725
MTIF2	2	55463731	55496483	0.087035
TCAP	17	37820440	37822808	0.087108
SULF2	20	46285092	46415360	0.087147
DVL1	1	1270656	1284730	0.08749
STX1A	7	73113536	73134002	0.087501
FXYD1	19	35629712	35634013	0.087636
OR2AG2	11	6789218	6790286	0.087673
PROX1	1	214156524	214214595	0.087682
USP44	12	95910336	95945266	0.087723
SNX5	20	17922241	17949623	0.087739
OR10W1	11	58034264	58035732	0.087772
ATF4	22	39915700	39918691	0.087847
ADSSL1	14	105190523	105213662	0.087953
SLC22A6	11	62703857	62752455	0.088015
CKS1B	1	154947129	154951725	0.088359
CNTNAP2	7	145813453	148118090	0.088422
CDC123	10	12237964	12292588	0.088543
SDCBP2	20	1290619	1309883	0.088627
SMAD3	15	67356101	67487533	0.088677
ST8SIA3	18	55018044	55038962	0.088861
ABCA13	7	48211055	48687092	0.088905
LNPEP	5	96271098	96373219	0.089027
DAD1	14	23033805	23058175	0.089236
SLC34A2	4	25656923	25680370	0.089378
UBE2T	1	202300785	202311108	0.089383
SCTR	2	120197419	120282070	0.089395
MDFIC	7	114562209	114659256	0.089448
CIT	12	120123595	120315095	0.08952
CHMP2A	19	59062933	59066491	0.08982
RGR	10	86004809	86019716	0.089971
ASPRV1	2	70187226	70189397	0.090035
GTF3C6	6	111279763	111289093	0.090067
ALDH2	12	112204691	112247782	0.090069
FCGR2A	1	161475220	161493803	0.090077
PF4V1	4	74718906	74719872	0.090247
GRIN3B	19	1000418	1009731	0.090357
GSK3A	19	42734338	42746777	0.090588
CCL8	17	32646055	32648421	0.090606
GPR123	10	134884433	134945179	0.090615
OR11H6	14	20691791	20692964	0.090699
SF3B2	11	65818200	65836779	0.090711
MZF1	19	59073298	59084942	0.090715
UCK2	1	165796768	165880855	0.090856
CHN1	2	175664091	175870097	0.090953
SLC25A10	17	79670404	79688042	0.090969
DIO2	14	80663873	80854100	0.091041
CDC26	9	116018115	116037869	0.091059
UBE2M	19	59067079	59070327	0.091098
B4GALT7	5	177027101	177037348	0.091104
SNRPD2P1	10	91738474	91738827	0.091145
AQR	15	35147732	35262040	0.091158
LIN7A	12	81186299	81331704	0.091254
CEACAM8	19	43084393	43099207	0.09127
PLA2G7	6	46671938	46703430	0.091469
LILRB2	19	54777675	54785039	0.091475
PRF1	10	72357104	72362531	0.091545
MRPL12	17	79670387	79674556	0.09169
CYP51A1	7	91741465	91772266	0.091818
ACLY	17	40023161	40086795	0.091846
RTN4RL2	11	57228022	57245007	0.091863
RAB36	22	23487513	23506537	0.091943
EIF3H	8	117654369	117779164	0.091966
EARS2	16	23533335	23569052	0.092185
SPRR2F	1	153084590	153085991	0.092202
PAIP2	5	138677276	138705406	0.092295
FAM32A	19	16296191	16302857	0.092394
IL34	16	70613798	70694585	0.092647
LRR1	14	50065415	50081390	0.092655
PGLYRP4	1	153302596	153321316	0.09294
SCN5A	3	38589548	38691164	0.093031
FOXO3	6	108881038	109005977	0.093172
OR4K5	14	20388741	20389818	0.0932
OR4K1	14	20403767	20404842	0.0932
GABRA5	15	27111510	27194354	0.093236
TIMM17A	1	201924619	201939789	0.093266
TMED9	5	177019159	177023125	0.093476
MYCT1	6	153019030	153045702	0.093544
KCNK17	6	39266777	39282329	0.093699
CD1D	1	158149737	158154686	0.09388
OPN5	6	47749718	47800516	0.094128
FRAS1	4	78978724	79465423	0.09414
GOLGA3	12	133345495	133405444	0.094674
LEPREL4	17	39958199	39968856	0.094732
MDFI	6	41604620	41621984	0.094751
GGT6	17	4460222	4464113	0.094784
ADCY5	3	123001143	123168605	0.095307
CERK	22	47080308	47134158	0.095344
RAX	18	56934267	56941318	0.095451
DSC2	18	28645940	28682378	0.095598
DPEP1	16	89679716	89704839	0.095845
ZNF416	19	58082934	58090295	0.095904
CYP11B1	8	143953772	143961262	0.09605
GJA5	1	147228332	147245484	0.096094
TKTL2	4	164392257	164395047	0.096103
YIPF3	6	43479565	43484728	0.096109
MAZ	16	29817427	29823649	0.096125
AOX1	2	201450591	201541787	0.096251
HIST1H4A	6	26021907	26022278	0.096352
TSGA10	2	99613724	99771427	0.096353
PMPCB	7	102937869	102969958	0.096441
TFF3	21	43731777	43735761	0.096558
ASL	7	65540785	65558545	0.096568
RPL17	18	47014851	47018906	0.09658
ZNF10	12	133707161	133736051	0.096616
FDPS	1	155278539	155290457	0.096722
SEH1L	18	12947132	12987535	0.096929
ZNF274	19	58694396	58724928	0.096938
ERN2	16	23701647	23724821	0.097032
GATM	15	45653322	45694525	0.097054
NTN4	12	96051583	96184930	0.097243
OR2T33	1	248436073	248437138	0.097247
ZNF605	12	133498019	133532892	0.09734
AIF1L	9	133971863	133998539	0.097423
DHX38	16	72127461	72146811	0.0975
TREM2	6	41126244	41130924	0.097639
GALC	14	88304164	88460009	0.097743
SHOX2	3	157814948	157824292	0.09783
SF1	11	64532078	64546258	0.097856
NFYC	1	41157320	41237275	0.097865
OR13F1	9	107266455	107267547	0.097889
TNFRSF18	1	1138888	1142071	0.098058
ULBP1	6	150285143	150294846	0.098332
PSMD5	9	123577774	123605262	0.098479
MAPK3	16	30125426	30134827	0.098537
GJC1	17	42875816	42908184	0.098569
GGA2	16	23474863	23533316	0.098624
GRID2	4	93225550	94695707	0.098686
OSBPL1A	18	21742008	21977844	0.098859
PI4K2A	10	99344131	99436191	0.098896
NDUFB8	10	102267203	102289757	0.098927
TNFAIP1	17	26662628	26674035	0.099043
GNB3	12	6949118	6956557	0.099102
PAK6	15	40509629	40569688	0.099132
FBXW2	9	123514256	123555690	0.099328
NRXN3	14	78708734	80330762	0.099519
ZNF530	19	58111253	58124090	0.099582
PECR	2	216861052	216947678	0.099782
VPS35	16	46690054	46723430	0.099896
ZNF17	19	57922531	57933307	0.099981
PRPF4	9	116037623	116055185	0.10008
DCP1B	12	2055220	2113701	0.1002
SIX2	2	45232300	45236569	0.1002
TGM4	3	44916100	44956482	0.10043
COL25A1	4	109731877	110223813	0.10063
CCBL2	1	89401456	89458636	0.10067
CEP76	18	12661832	12702776	0.10067
HIF1AN	10	102288829	102319755	0.10076
RPS6KA2	6	166822852	167319939	0.1008
EIF3F	11	7991798	8023409	0.10102
TERF2	16	69389464	69442474	0.10119
SLC25A11	17	4840425	4843546	0.10141
ANXA5	4	122589110	122618268	0.10153
IFNA2	9	21384254	21385396	0.10155
IFNA8	9	21409146	21410184	0.10155
OR4E2	14	22133297	22134238	0.1016
HIST1H3A	6	26020718	26021186	0.10166
IL18BP	11	71709587	71716761	0.10168
GATA5	20	61038553	61051026	0.10175
GPR6	6	110299514	110301921	0.10187
SLC2A11	22	24198890	24228496	0.10193
BRAP	12	112079950	112123790	0.10235
SETD8	12	123868320	123893905	0.10268
INHBC	12	57828543	57844611	0.10274
HMCN1	1	185703683	186160085	0.10291
ANKRD1	10	92671853	92681033	0.10304
FNDC8	17	33448598	33457751	0.10309
SPRR2E	1	153065611	153078660	0.10316
SLC4A7	3	27414214	27525911	0.10323
CACNG5	17	64831235	64881603	0.10333
ENDOU	12	48103517	48119350	0.10335
RAB38	11	87846410	87908635	0.10339
PARP2	14	20811741	20826064	0.10339
KCNJ6	21	38979678	39288749	0.10341
FHL2	2	105974169	106054970	0.10344
SND1	7	127292234	127732661	0.10361
RUSC1	1	155290687	155300905	0.10366
PRPF6	20	62612488	62664453	0.10373
GLI2	2	121493199	121750229	0.10394
MGAT2	14	50087489	50090198	0.10397
SIN3B	19	16940211	16991164	0.104
CYR61	1	86046444	86049645	0.10414
PFDN1	5	139624624	139682706	0.10427
OR11H4	14	20710898	20711979	0.10435
PROSC	8	37620111	37637283	0.10438
MICU1	10	74127098	74385899	0.10445
GSTA5	6	52696453	52710893	0.10477
PKLR	1	155259630	155271225	0.1048
RPL21P75	7	20042346	20042909	0.10486
SPATA5	4	123844229	124240605	0.10487
CHMP1A	16	89710839	89724253	0.10495
OSTF1	9	77703459	77762181	0.10496
TLE3	15	70340129	70390515	0.10507
VWA1	1	1370241	1378262	0.10513
NF1	17	29421945	29709134	0.10519
U2SURP	3	142683339	142779567	0.10534
DDX1	2	15731302	15771235	0.10544
FREM1	9	14734664	14910993	0.10551
OR52N4	11	5775923	5776959	0.10554
OR2AG1	11	6806248	6807245	0.10565
MRPS18C	4	84377085	84390888	0.10633
ITGA7	12	56078352	56109827	0.10639
SUB1	5	32531739	32604185	0.10672
MORC1	3	108677086	108836989	0.10682
CHIT1	1	203181955	203242769	0.10683
FDFT1	8	11653082	11696818	0.10698
SLCO4C1	5	101569690	101632253	0.10705
PABPC1	8	101698044	101735037	0.1071
TEAD4	12	3068496	3149839	0.10727
TOP2A	17	38544768	38574202	0.10735
IRAK1BP1	6	79577189	79656157	0.10735
KLF6	10	3818188	3827473	0.10746
SRCIN1	17	36686251	36762183	0.10748
BCR	22	23521891	23660224	0.10773
CFI	4	110661852	110723335	0.10792
P2RX7	12	121570622	121623876	0.10794
IRAK4	12	44152747	44183346	0.10815
LRIT1	10	85991349	86001217	0.10825
AFP	4	74296855	74321891	0.10841
CDK2AP1	12	123745528	123756881	0.10847
CRNKL1	20	20015012	20036690	0.10862
DKK3	11	11984653	12031316	0.10866
RBPJL	20	43935491	43945803	0.10869
ATP6V1B2	8	20054878	20084330	0.10898
PPP1R17	7	31726329	31748069	0.10899
CYP2S1	19	41698954	41713444	0.109
NBEA	13	35516424	36247159	0.10903
TNN	1	175036994	175117202	0.10945
C5	9	123714616	123812554	0.1095
LGMN	14	93170152	93215047	0.11019
ATP6V1C2	2	10861775	10925236	0.11032
SI	3	164696686	164796283	0.1105
CHFR	12	133398773	133532890	0.11052
MAN2A1	5	109025067	109205326	0.11058
TSPAN8	12	71518865	71835678	0.11059
ISM1	20	13202418	13281298	0.1106
LEMD3	12	65563351	65642107	0.11066
CDK5R1	17	30813637	30818274	0.11066
XBP1	22	29190543	29196585	0.11091
CYCS	7	25159710	25164980	0.11096
CCL13	17	32683471	32685629	0.11098
GOLGA2	9	131018108	131038274	0.11104
ERCC5	13	103497194	103528345	0.11109
GTF3C5	9	135906076	135933890	0.11118
TUBG1	17	40761694	40767252	0.1112
MYO1C	17	1367392	1396106	0.11124
PAX7	1	18957500	19075360	0.11127
EPAS1	2	46520806	46613836	0.11127
COG6	13	40229764	40365802	0.11128
PIGR	1	207101863	207119811	0.11131
APOBEC3G	22	39436924	39483748	0.11147
ELOVL4	6	80624529	80657297	0.11148
GATAD2A	19	19496635	19619740	0.11151
DERL2	17	5374571	5390131	0.11175
PSD4	2	113914902	113966973	0.11182
SUCLG1	2	84650647	84687169	0.11185
ARHGAP27	17	43471275	43511787	0.11186
OR4C46	11	51515282	51516211	0.11215
UNC93B2	7	6895116	6899461	0.11231
AK4	1	65613232	65697828	0.11233
SLC6A5	11	20620946	20680831	0.11257
RASD1	17	17397751	17399709	0.11257
COPG2	7	130146089	130353598	0.11257
SERPINA10	14	94749650	94759608	0.11275
SHB	9	37919131	38069210	0.11286
BHLHE41	12	26272959	26278060	0.11295
CAPN1	11	64948037	64979477	0.11298
LRG1	19	4536421	4540486	0.11303
C1QL2	2	119913819	119916465	0.11317
CDHR5	11	616565	626078	0.11324
AMOTL2	3	134074716	134094321	0.11331
ALG11	13	52586534	52603800	0.11332
CCT4	2	62095224	62115939	0.11334
CHSY3	5	129240165	129522327	0.11334
SNX2	5	122110691	122165803	0.11337
RSU1	10	16632610	16859527	0.11351
SHANK1	19	51165084	51222707	0.11358
AFM	4	74347400	74369691	0.11376
MTRF1	13	41790505	41837742	0.11399
OR2T12	1	248457918	248458880	0.11406
OR5B17	11	58125597	58126542	0.1142
OTOF	2	26680071	26781566	0.11423
LEFTY2	1	226124298	226129189	0.11427
MED8	1	43849588	43855479	0.11455
TMPO	12	98909290	98944157	0.11465
OR4A15	11	55135360	55136394	0.11468
GCGR	17	79762008	79771889	0.11472
MED10	5	6371994	6378707	0.115
LAMP1	13	113951556	113977987	0.11507
P2RY14	3	150929905	150996255	0.11512
PTGES	9	132500610	132515326	0.11525
COQ2	4	84182689	84206067	0.11532
IK	5	140026643	140042064	0.11538
FUT7	9	139924626	139927462	0.11552
CR2	1	207627575	207663240	0.11556
ACPP	3	132036211	132087142	0.11564
RBM45	2	178977151	179003738	0.11566
ART3	4	76932337	77033955	0.11569
IGFBPL1	9	38408991	38424444	0.11585
SGMS1	10	52065360	52384923	0.11587
CREB3L2	7	137559725	137686813	0.11598
SPDYA	2	29005383	29073477	0.11608
OR7A10	19	14951760	14952689	0.11627
AIMP2	7	6048876	6063465	0.11643
DSN1	20	35380194	35402221	0.11669
C1QB	1	22979255	22988031	0.1168
LEPREL2	12	6937572	6949018	0.1169
UCKL1	20	62571186	62587769	0.11699
FOXG1	14	29235050	29238870	0.11703
ELL	19	18553473	18632937	0.11715
ACVR2A	2	148602086	148688393	0.11733
DCD	12	55038375	55042277	0.11746
TIMP3	22	33197687	33259030	0.1178
GNG8	19	47137333	47137942	0.11784
PDS5A	4	39824483	39979576	0.11794
HAND1	5	153854532	153857824	0.11798
MATN1	1	31184124	31196434	0.118
MED9	17	17380300	17396540	0.11824
TFF2	21	43766466	43771237	0.11835
PDPR	16	70147529	70195203	0.11845
EGF	4	110834040	110933422	0.11859
RPS29	14	50043390	50065408	0.11863
SEMA6B	19	4542600	4559820	0.1187
MLX	17	40719086	40725257	0.11871
CD160	1	145695798	145715614	0.11881
BAIAP2	17	79008948	79091232	0.11903
PRKCA	17	64298754	64806861	0.11908
SYNGR1	22	39745930	39781593	0.11914
EZH1	17	40852293	40897071	0.11921
KIFAP3	1	169890467	170054349	0.11929
KCNN1	19	18062102	18110889	0.11942
HIST1H2BB	6	26043455	26043885	0.11942
MMP11	22	24110413	24126503	0.11951
CXCL14	5	134906373	134914969	0.11954
RPL10L	14	47120222	47121028	0.11955
CXCL3	4	74902306	74904524	0.11959
NUDT16L1	16	4743695	4745860	0.11974
MTNR1A	4	187454809	187476721	0.11978
TRHDE	12	72481046	73059422	0.1199
TBX5	12	114791736	114846247	0.12018
RPL36AL	14	50085237	50087403	0.12023
COX10	17	13972813	14111994	0.12033
HCN1	5	45259349	45696253	0.12039
POLRMT	19	617223	633597	0.12041
C14orf166	14	52456193	52471420	0.12046
FURIN	15	91411822	91426688	0.12049
EPHB1	3	134316643	134979309	0.1207
RDH11	14	68143518	68162531	0.12103
AHCYL1	1	110527308	110566357	0.12107
FAT1	4	187508937	187647876	0.1218
SERTAD2	2	64858755	64978139	0.12209
WIF1	12	65444406	65515346	0.12213
HSD17B12	11	43577986	43878167	0.12225
EEF2	19	3976054	3985467	0.12226
SULT1C4	2	108994367	109004513	0.1223
NUDT2	9	34329504	34343709	0.12243
CENPF	1	214776538	214837931	0.12258
GPR124	8	37641709	37702414	0.12263
TFAP2B	6	50786436	50815326	0.12269
SIGIRR	11	405716	417455	0.12274
ZNF423	16	49521435	49891830	0.12275
APBA1	9	72042446	72287222	0.1228
OMG	17	29599031	29624557	0.12288
RAB35	12	120532899	120555306	0.12309
CDK11B	1	1570603	1590473	0.12316
CXCL5	4	74861359	74864496	0.12317
COASY	17	40713485	40718295	0.12318
HIST1H2AB	6	26033320	26033796	0.12329
NAGLU	17	40688190	40696467	0.12336
FGB	4	155484108	155492238	0.12342
TRIM22	11	5710919	5758319	0.1236
LRCH4	7	100169855	100183776	0.12375
ERF	19	42751724	42759309	0.12383
COCH	14	31343720	31364271	0.12386
BCL2L10	15	52401460	52404972	0.12404
DNAI1	9	34457412	34520982	0.12425
NPTX1	17	78440948	78451643	0.12433
CORT	1	10509776	10511959	0.12448
HEXIM1	17	43224684	43229468	0.12454
SERPINB10	18	61564408	61603345	0.12486
OR6Q1	11	57798402	57799403	0.1249
SERPINA4	14	95027428	95036250	0.12496
CENPA	2	26987157	27023935	0.1253
PPIF	10	81107225	81115093	0.12551
GADD45G	9	92219928	92221470	0.12554
OR5B3	11	58169937	58170882	0.1256
GKAP1	9	86354336	86444431	0.12583
SOX21	13	95361886	95364389	0.12589
AKR7A2	1	19630459	19638640	0.126
RECK	9	36036430	36124448	0.12604
HFE	6	26087509	26098571	0.12616
OR4A16	11	55110627	55111707	0.12628
MBD4	3	129149787	129158878	0.1264
KCNAB2	1	6051526	6161253	0.12646
ZBTB7B	1	154975127	154990998	0.12671
ENSA	1	150573327	150602088	0.12675
CCDC113	16	58265061	58317740	0.12687
IL19	1	206972215	207016324	0.1269
FBXO44	1	11714432	11723384	0.12691
ZFP1	16	75182390	75206134	0.12717
RPL22P11	2	110494713	110495100	0.12719
BDH1	3	197236654	197300194	0.12732
SLC25A16	10	70237756	70287231	0.12737
GPR39	2	133174147	133404132	0.12775
SLC31A2	9	115913222	115926417	0.12778
ZNF219	14	21558205	21572881	0.12785
ADAM12	10	127700950	128077024	0.12794
RPS6	9	19375713	19380252	0.12798
OPA3	19	46030685	46105470	0.12802
ZBTB16	11	113930315	114121398	0.12811
SFRP1	8	41119481	41167016	0.12814
SIRT6	19	4174106	4182601	0.12842
SIX1	14	61110133	61124977	0.12856
ERAP2	5	96211643	96255420	0.12858
PCLO	7	82383329	82792246	0.12862
LMX1B	9	129376722	129463311	0.12875
U2AF1	21	44513066	44527697	0.12888
MAPKAPK5	12	112279782	112334343	0.12893
GPR25	1	200842083	200843306	0.12913
IL1RN	2	113864791	113891593	0.12948
RBM6	3	49977440	50137478	0.12953
POU4F1	13	79172497	79177673	0.12954
PHLPP1	18	60382672	60647666	0.12959
OR10AG1	11	55734975	55735990	0.12963
SYT3	19	51124564	51171651	0.12963
HIST1H3B	6	26031817	26032288	0.12963
RPL27A	11	8703958	8736306	0.12967
XRCC2	7	152341864	152373250	0.12995
MRPL3	3	131181056	131221827	0.13006
CCNDBP1	15	43477316	43487396	0.1302
GRB14	2	165349322	165478358	0.13021
MAT2B	5	162930120	162946342	0.13022
APBB3	5	139937853	139973337	0.13025
DCTD	4	183811213	183839089	0.1303
SCT	11	626431	627143	0.13093
NMNAT3	3	139279022	139396859	0.13105
HIST1H4B	6	26027124	26027480	0.13107
CSF2RB	22	37309670	37336491	0.13108
CMAS	12	22199108	22218608	0.13117
LLGL2	17	73521161	73571289	0.13117
CETP	16	56995762	57017757	0.13119
HNF1A	12	121416346	121440315	0.13154
OR51G2	11	4935900	4936922	0.13159
MKL1	22	40806285	41032706	0.13168
MUC20	3	195447753	195467994	0.13168
CTSK	1	150768684	150780799	0.13201
INPP5K	17	1397865	1420182	0.13204
SOCS1	16	11348262	11350036	0.13215
UPK1B	3	118892364	118924000	0.13215
PCYT2	17	79858841	79869340	0.13228
NCALD	8	102698771	103137135	0.13231
MMP26	11	4726157	5013659	0.13248
OR1N2	9	125315391	125316493	0.13253
PIAS3	1	145575233	145586546	0.13262
ZNF138	7	64254766	64294054	0.13275
NDST4	4	115748919	116035032	0.13283
SPSB1	1	9352939	9429591	0.13308
MUC22	6	30978251	31003179	0.13326
PGF	14	75408537	75422487	0.13328
UQCRFS1	19	29698173	29704448	0.1333
LIMS2	2	128395956	128439360	0.13348
ANAPC13	3	134196548	134205558	0.13361
MCAM	11	119179241	119192231	0.13368
CYP4F12	19	15783567	15807984	0.13369
AP1M1	19	16308389	16346160	0.13369
DDX46	5	134094469	134190823	0.13369
CTSE	1	206317459	206332104	0.1337
WBP11	12	14939410	14956474	0.13381
SRPK2	7	104751151	105039755	0.13416
DGKQ	4	952675	980683	0.13421
DCTN2	12	57923885	57941114	0.1343
CPT2	1	53662101	53679869	0.13437
PGLYRP3	1	153270338	153283194	0.13438
DRD2	11	113280318	113346413	0.1345
HCFC2	12	104458235	104498639	0.13452
RPL36	19	5674958	5691887	0.1346
ZNF548	19	57901218	57912786	0.13465
MS4A2	11	59855734	59863444	0.13476
NEBL	10	21068902	21463116	0.13481
SAE1	19	47616531	47713886	0.13481
RPLP0	12	120634489	120639038	0.1349
ADD1	4	2845584	2931803	0.13502
AKAP11	13	42846289	42897396	0.13505
KIF5A	12	57943781	57980415	0.13514
MC1R	16	89978527	89987385	0.13516
UNC93A	6	167684657	167729507	0.13516
SERPINB8	18	61637159	61672278	0.13534
CLDN11	3	170136653	170578169	0.1355
TRIM36	5	114460459	114516243	0.13558
PLRG1	4	155456158	155471587	0.13572
CDC5L	6	44355262	44418163	0.13572
ZNF577	19	52359055	52394203	0.13591
ITGA10	1	145524891	145543868	0.13604
HIST1H1C	6	26055968	26056699	0.13609
CLSPN	1	36185819	36235568	0.13616
DDR2	1	162601163	162757190	0.13625
SNRPF	12	96252706	96297606	0.13659
ANLN	7	36429415	36493400	0.13664
SPG21	15	65255362	65282648	0.13667
MEF2BNB-MEF2B	19	19256376	19302967	0.13686
MEF2B	19	19256377	19303400	0.13686
PPT1	1	40538379	40563375	0.13706
GLRB	4	157997209	158093242	0.13708
OR8S1	12	48901137	48923680	0.13722
RBM22	5	150070356	150080669	0.13725
B3GAT1	11	134248398	134281812	0.13739
PRSS23	11	86502101	86663952	0.13759
MKRN3	15	23810454	23873064	0.13769
PMS2	7	6012870	6048756	0.13781
LIPA	10	90973326	91174314	0.13784
RBM5	3	50126341	50156454	0.13786
ADAMTS16	5	5140443	5320417	0.13796
PREP	6	105725440	105850959	0.13799
TPSG1	16	1271651	1275257	0.13805
HSD17B1	17	40701232	40707231	0.13823
UBE2G2	21	46188955	46221934	0.13823
MMP7	11	102391239	102401484	0.13829
CD14	5	140011313	140013286	0.13843
SMG7	1	183441351	183567381	0.13852
ORC4	2	148687968	148779147	0.13869
OR5I1	11	55702932	55703876	0.13877
RELA	11	65421067	65430565	0.13884
C8B	1	57394883	57431813	0.13918
CEP63	3	134204585	134293859	0.13918
NUDT6	4	123809852	123844123	0.13923
SFTPC	8	22014426	22021992	0.13924
EIF2AK1	7	6061881	6098861	0.13935
CARD10	22	37886400	37915549	0.13949
SPRR2C	1	153112967	153113185	0.13966
OR10A6	11	7949180	7950209	0.13991
CHERP	19	16628700	16653341	0.13992
BCCIP	10	127512115	127542264	0.14004
C1QTNF9	13	24881304	24896673	0.14009
CXXC4	4	105389469	105416058	0.14054
GUSB	7	65425671	65447301	0.14056
UROS	10	127477146	127511817	0.14065
IL36B	2	113779668	113810444	0.14076
OR10Q1	11	57995354	57996390	0.14088
RDH14	2	18735989	18741946	0.14093
ATP6V0A4	7	138391040	138484305	0.14096
CDC27	17	45195069	45266788	0.14107
GNAT3	7	80087987	80141336	0.14111
CBLL1	7	107384142	107402112	0.14112
MMP23B	1	1567474	1570639	0.14145
OR51G1	11	4944531	4945637	0.14145
IL17B	5	148750887	148783765	0.14149
RAD51B	14	68286496	69196935	0.14156
PAX1	20	21686297	21696620	0.14161
CYBRD1	2	172378757	172414643	0.14162
OPN3	1	241753404	241840678	0.14177
CPD	17	28705923	28797007	0.1418
PCOLCE	7	100199800	100205798	0.14184
ARHGDIG	16	318726	333003	0.14204
ELOVL7	5	60047618	60140216	0.14214
RAPGEF6	5	130759614	130970929	0.14215
CXCL10	4	76942273	76944650	0.14221
MIER1	1	67390578	67454302	0.14229
CDC42EP5	19	54976210	54984411	0.14247
ORC6	16	46723555	46732306	0.14248
SDC1	2	20400558	20425194	0.14268
TAS2R39	7	142880512	142881528	0.14281
OR10J5	1	159504793	159505842	0.14283
PEX7	6	137143717	137235075	0.14291
NLK	17	26368763	26523407	0.14315
GINS4	8	41386725	41402565	0.14325
NFE2L2	2	178092323	178257425	0.14328
PTDSS2	11	448268	491393	0.14339
MGST3	1	165600098	165631033	0.1436
LPP	3	187871072	188608460	0.14392
EXOSC2	9	133569108	133580248	0.14407
ATP1B1	1	169074935	169101960	0.14412
SPRR2G	1	153122058	153123345	0.14426
FGF11	17	7341592	7348256	0.14468
SLC43A1	11	57252007	57283259	0.14472
CHRM5	15	34260921	34357291	0.14476
CREB3L3	19	4153598	4173051	0.14488
SPRR2A	1	153028589	153030013	0.14513
LGALS2	22	37966255	37978623	0.1452
PYGM	11	64513861	64527769	0.14526
RHO	3	129247483	129254012	0.14526
NFKB1	4	103422486	103538459	0.14539
SETD2	3	47057919	47205457	0.14546
CELF2	10	11047259	11378674	0.14561
CLEC2L	7	139208602	139229730	0.14578
COTL1	16	84599200	84651683	0.14598
C12orf68	12	48577366	48579709	0.14631
PI4KB	1	151264273	151300191	0.14659
NUDT5	10	12207324	12238143	0.14665
FCRL2	1	157715523	157746922	0.14673
CDKN1A	6	36644305	36655116	0.14688
PIGP	21	38431470	38445470	0.14692
CADM2	3	85008132	86123579	0.14699
SMCP	1	152850793	152857523	0.14712
MUC13	3	124624289	124672663	0.14723
OR52N5	11	5798864	5799897	0.14731
ZNF442	19	12460185	12476719	0.14742
BTG2	1	203274619	203278730	0.14759
SLC26A1	4	972861	987228	0.14761
OR5F1	11	55761157	55762101	0.14775
SEC61B	9	101984346	101992897	0.1478
CLEC5A	7	141627157	141646807	0.14783
STON1	2	48756522	48826025	0.1479
CES5A	16	55880066	55989943	0.14796
PIP4K2C	12	57984957	57997198	0.148
HPX	11	6452279	6463847	0.14822
DZIP1	13	96230457	96296957	0.14824
UCN	2	27530268	27531313	0.14854
SDC4	20	43953928	43977064	0.14867
HS3ST4	16	25703347	26149009	0.14878
HIVEP1	6	12008995	12165232	0.14892
ZMIZ1	10	80828792	81076276	0.14895
CASP10	2	202047604	202094129	0.14932
EVI2B	17	29630784	29641130	0.14938
NEGR1	1	71861623	72748417	0.1494
AVPR1B	1	206223976	206231639	0.14948
IL36RN	2	113816215	113822959	0.14967
OPCML	11	132284871	133402414	0.14971
ALG12	22	50293877	50312106	0.14979
NFAM1	22	42776416	42828401	0.14985
KCNA1	12	5019071	5040527	0.14987
BLZF1	1	169337208	169365778	0.14989
DNAJA3	16	4475806	4506776	0.1499
FCN1	9	137801431	137809809	0.1499
OXCT1	5	41730167	41870621	0.15003
CLIP2	7	73703805	73820273	0.15003
ST8SIA2	15	92937058	93011958	0.15004
OR1N1	9	125288637	125289572	0.15015
PSG9	19	43715943	43773682	0.15028
DGKD	2	234263153	234380750	0.1503
TBCE	1	235530675	235612283	0.15033
TXN	9	113006091	113018920	0.15034
ANGPTL5	11	101761405	101787253	0.1504
TNKS	8	9413424	9639856	0.1505
PLCG1	20	39765600	39811629	0.15063
RER1	1	2323267	2336883	0.15064
CDS1	4	85504132	85572491	0.15081
CXCL9	4	76922428	76928641	0.15083
MMP21	10	127455022	127464390	0.15103
OR13A1	10	45798102	45811056	0.15121
NOV	8	120428546	120436593	0.15126
OR5AS1	11	55797895	55798869	0.15135
CLRN1	3	150643950	150690786	0.15153
FAM57B	16	30035748	30064299	0.1516
FYN	6	111981535	112194655	0.15171
NKX2-8	14	37049784	37051812	0.15186
ETFDH	4	159593277	159630775	0.15201
MIOX	22	50925213	50929077	0.1522
DTX1	12	113494514	113535833	0.15236
TEX15	8	30689060	30748122	0.15272
MYL4	17	45277812	45301045	0.15275
WHSC1	4	1873151	1983934	0.15296
DOC2A	16	30016830	30034591	0.15304
FOXP2	7	113726382	114333827	0.1531
CD244	1	160799950	160832692	0.15312
FBN3	19	8130286	8214730	0.15344
SEC31A	4	83739814	83822319	0.15352
PRPS1L1	7	18066405	18067486	0.15363
COL19A1	6	70576463	70919679	0.15376
SYNGR2	17	76164639	76169608	0.15378
MARK4	19	45582546	45808541	0.15416
STAC3	12	57637236	57644976	0.15432
KLK2	19	51364824	51383823	0.15435
ARNT	1	150782181	150849244	0.15453
HIST1H2BD	6	26158349	26171577	0.15463
EPB42	15	43398423	43513481	0.15465
ZIK1	19	58089824	58105145	0.15473
OR51E2	11	4701401	4719084	0.15477
GCHFR	15	41056218	41059906	0.15482
TSNARE1	8	143293441	143484601	0.15493
ACTR1B	2	98272431	98280570	0.15502
CSNK1G3	5	122847793	122952739	0.15542
SLC1A7	1	53552855	53608289	0.15555
MCL1	1	150547032	150552066	0.15558
COMT	22	19929130	19957498	0.15558
MAK	6	10762956	10838764	0.1556
OR52E2	11	5079880	5080857	0.15562
RDH10	8	74206847	74237516	0.15563
RGS18	1	192127587	192154945	0.1557
CPNE7	16	89642176	89663654	0.156
ZFYVE28	4	2271309	2420390	0.15616
DARS	2	136664247	136743670	0.15642
SCO1	17	10583654	10601692	0.15656
BOK	2	242498136	242513546	0.1566
MYEF2	15	48431625	48470714	0.15662
ABCA12	2	215796266	216003151	0.15698
OR2T2	1	248616077	248617130	0.15711
ACTN2	1	236849754	236927931	0.15724
FIG4	6	110012499	110146631	0.15737
OR4D1	17	56232494	56233517	0.1575
TUBD1	17	57936851	57970304	0.15752
HPN	19	35531410	35557475	0.15771
DRD3	3	113847499	113918254	0.15772
APH1B	15	63568217	63601325	0.15776
NOLC1	10	103911933	103923627	0.15798
MYLK3	16	46740891	46824319	0.1581
ZAP70	2	98330023	98356325	0.15817
OR8D4	11	123777109	123778183	0.15841
MEGF6	1	3406484	3528059	0.15844
PPBP	4	74852755	74853914	0.15868
VAMP5	2	85811531	85820535	0.15904
SPRY4	5	141689992	141706020	0.15909
LOXL3	2	74759541	74782817	0.15912
HIST1H4C	6	26104104	26104518	0.15914
VPS37C	11	60897728	60929089	0.15957
ZNF551	19	58193337	58228669	0.15963
ASPH	8	62413116	62627155	0.15964
OR51I1	11	5461800	5462744	0.15971
RICTOR	5	38938021	39074510	0.15974
MANEA	6	96025419	96057333	0.15977
AZU1	19	825097	832017	0.15983
SLPI	20	43880880	43883205	0.15993
BET1L	11	167784	207428	0.16011
PTPN2	18	12785477	12929642	0.16021
USP13	3	179370543	179507189	0.16078
PIGX	3	196366646	196462878	0.161
ENAH	1	225674537	225840844	0.16105
RAB6C	2	130737235	130740311	0.16106
SNW1	14	78183942	78227550	0.1611
PRM2	16	11369496	11370337	0.16138
CSRP2BP	20	18118762	18169031	0.16155
AIP	11	67250512	67258574	0.16167
CDC42EP1	22	37956454	37965412	0.1617
MEST	7	130126012	130146133	0.1617
CCDC8	19	46913629	46916841	0.16173
SMARCA5	4	144434616	144478639	0.16185
MIS12	17	5389605	5394134	0.16199
NDUFA4L2	12	57628686	57634498	0.16202
SLC12A2	5	127419458	127525380	0.16246
ASAH1	8	17913934	17942494	0.16251
AKR1C4	10	5237425	5260912	0.16269
DNASE2B	1	84864215	84880701	0.16281
GSTA3	6	52761437	52774483	0.16292
BNIPL	1	151009046	151020076	0.16309
CISD1	10	60028818	60049346	0.1631
OR4D2	17	56247017	56247940	0.16314
GMPS	3	155588325	155661815	0.1632
OR5W2	11	55681126	55682058	0.16322
OR13J1	9	35869375	35870461	0.16324
PEX13	2	61244360	61279125	0.1633
PCDH7	4	30722037	31148422	0.16335
BBC3	19	47724081	47736023	0.16385
EDAR	2	109510927	109605828	0.16395
PAX8	2	113973574	114036527	0.16395
NFIC	19	3359561	3469215	0.16407
PTPRCAP	11	67202981	67205538	0.16413
DLG2	11	83166055	85338966	0.16419
GPR65	14	88471468	88478419	0.1642
FBXL4	6	99316420	99395849	0.16425
CAP1	1	40505905	40538321	0.16428
ALDOA	16	30064411	30081778	0.16447
SLC35D1	1	67465015	67519782	0.16449
DKK1	10	54074056	54077802	0.16461
CYP1A1	15	75011883	75017951	0.1648
HIST1H3C	6	26045639	26046097	0.16486
BMPR1A	10	88516407	88692595	0.16493
NR1D1	17	38249040	38256978	0.16504
ABCC2	10	101542489	101611949	0.1652
KLK3	19	51358171	51364020	0.16529
CCR8	3	39371197	39375171	0.16546
CSK	15	75074398	75095539	0.16557
GSC2	22	19136089	19137796	0.16559
POLR1C	6	43477440	43497323	0.16562
HNRNPR	1	23630264	23670829	0.16565
FTCD	21	47556176	47575481	0.16566
CD59	11	33719807	33757991	0.16567
NAPG	18	10525902	10552758	0.16571
LDHD	16	75145758	75150669	0.16574
RASGRP2	11	64494383	64512928	0.16593
SP140	2	231067826	231223762	0.16596
RPL34P31	17	25601133	25601503	0.16604
NCOR1	17	15932471	16121499	0.16609
CHADL	22	41625517	41636938	0.1665
HGS	17	79650356	79670168	0.16668
TERF2IP	16	75681684	75795770	0.1669
CIRBP	19	1259384	1274879	0.1669
UBA5	3	132373290	132396941	0.16697
KCNJ16	17	68049570	68131749	0.16706
DOK6	18	67068291	67516323	0.16709
IGHE	14	106064224	106068065	0.16765
ERP29	12	112451120	112461255	0.16768
TPSAB1	16	1290697	1292555	0.1677
VCAM1	1	101185298	101204601	0.16786
NAT9	17	72766686	72772506	0.16819
MECOM	3	168801287	169381406	0.16821
NPC1	18	21086148	21166862	0.16825
METTL2B	7	128116783	128146656	0.16829
DOLPP1	9	131843379	131852717	0.16832
NOS1	12	117645947	117889975	0.16837
ANAPC5	12	121746048	121837699	0.16857
ARSA	22	51061182	51066607	0.16858
UCHL5	1	192981380	193029237	0.16859
GPC5	13	92050929	93519490	0.16895
SENP2	3	185300284	185351339	0.16896
ANPEP	15	90328120	90358633	0.169
SRGN	10	70847862	70864567	0.16917
RARA	17	38465444	38513094	0.16921
APOBEC2	6	41021043	41032250	0.16939
IPMK	10	59951278	60027694	0.16972
NEDD9	6	11183531	11382581	0.16998
CEPT1	1	111682249	111727724	0.17
ABCA5	17	67240452	67323385	0.17014
MUT	6	49398073	49430904	0.17021
MRPL41	9	140445651	140447007	0.17037
GSTM3	1	110276554	110284384	0.17079
NQO2	6	2988221	3019996	0.17086
CEP57	11	95523129	95565857	0.17112
MAPK14	6	35995488	36079013	0.17116
OR5B2	11	58189738	58190786	0.17121
OR6A2	11	6815756	6817128	0.17132
INSL4	9	5231419	5235304	0.17143
PUM1	1	31404353	31538838	0.17145
FBXW8	12	117348761	117468953	0.17163
HAGHL	16	776936	785525	0.17163
SGOL2	2	201374731	201448505	0.17178
NDUFA2	5	140018325	140027370	0.17188
USP5	12	6961292	6975796	0.1719
AVEN	15	34158428	34331377	0.17199
NKX6-1	4	85413140	85419603	0.17199
IGFBP4	17	38599702	38613983	0.17204
ADSL	22	40742507	40786467	0.17205
PTP4A2	1	32372022	32410457	0.17235
BAG5	14	104022881	104029168	0.17237
NUMA1	11	71713910	71791739	0.17246
WNT8B	10	102222798	102243501	0.17248
CABP4	11	67219877	67226699	0.17274
XDH	2	31557187	31637581	0.17278
LIPC	15	58702768	58861151	0.17279
PDE4D	5	58264865	59817947	0.17279
STAT3	17	40465342	40540586	0.17283
CLGN	4	141309609	141349122	0.17295
OR2T3	1	248636627	248637634	0.17299
OR2T5	1	248651885	248652898	0.17299
GAB1	4	144257915	144395721	0.1731
NT5C2	10	104845940	104953056	0.17319
ADIPOR2	12	1797740	1897844	0.17368
PEX11B	1	145516252	145523730	0.17375
KAT7	17	47865917	47906458	0.17377
PMS2P1	7	99918615	99939531	0.17387
SAP30	4	174291120	174298683	0.17391
AKR1C3	10	5077546	5149878	0.17396
PIAS4	19	4007644	4039384	0.17397
ASH1L	1	155305059	155532598	0.17405
AGPAT4	6	161551011	161695093	0.17405
SLC20A1	2	113403434	113421404	0.17415
CDT1	16	88869621	88875666	0.17418
DYNC2LI1	2	44001178	44037149	0.17434
KCNMA1	10	78629359	79398353	0.17456
DUT	15	48623208	48635570	0.17458
OR51B4	11	5322244	5323226	0.17469
FASLG	1	172628154	172636014	0.17471
ATXN1	6	16299343	16761722	0.17473
GGCX	2	85771846	85788670	0.17474
CACNG4	17	64961026	65029514	0.1748
TPH1	11	18039111	18063973	0.17485
USP53	4	120133742	120216672	0.17524
ENTPD2	9	139942550	139948497	0.17533
HIRIP3	16	30003645	30007757	0.17541
SEC24D	4	119643978	119759838	0.17548
RIPK1	6	3064225	3115421	0.17572
PLAGL2	20	30780306	30795594	0.1759
CAPN9	1	230883130	230937749	0.17603
EEF1E1	6	8073593	8102811	0.17613
ADM2	22	50919985	50924869	0.17618
HIST1H2BK	6	27106073	27114619	0.17619
PLA2G12A	4	110631145	110651233	0.17637
CAPN2	1	223889295	223963720	0.17639
CYP2B6	19	41497204	41524303	0.1765
TMEM11	17	21100593	21117937	0.17658
PAPD7	5	6714718	6757161	0.1766
CTSL	9	90340434	90346308	0.17662
ITGA9	3	37493606	37865005	0.17673
SPDYC	11	64937625	64940715	0.1768
OGG1	3	9791628	9829903	0.17681
MPHOSPH10	2	71357444	71377231	0.17691
ZNF334	20	45129701	45142198	0.17691
NTSR2	2	11798304	11810290	0.17702
CYBA	16	88709691	88717560	0.17711
NOG	17	54671060	54672951	0.17746
AHSA1	14	77924213	77935817	0.1775
PSAT1	9	80912059	80945009	0.17759
RHD	1	25598884	25656936	0.17768
GPC1	2	241375088	241407493	0.17768
PTH	11	13513602	13517728	0.17782
CORO1A	16	30194148	30200397	0.17782
RPL41	12	56510370	56511727	0.17786
PDPK1	16	2587965	2653189	0.17808
DDX43	6	74104471	74127292	0.1781
MGAT1	5	180217541	180242652	0.17828
PPP1R3A	7	113516832	113715975	0.17836
TUBA1B	12	49521565	49525180	0.17843
AMD1	6	111195973	111216916	0.17845
COL3A1	2	189839046	189877472	0.17858
DAPK1	9	90112143	90323548	0.17863
GRK7	3	141496990	141537332	0.17882
APOC1	19	45417504	45422606	0.17883
ECHS1	10	135175984	135187193	0.17903
CLDN10	13	96085858	96232013	0.17907
NDUFB2	7	140390577	140422590	0.17912
NKX2-5	5	172659112	172662360	0.17913
ADAMTS19	5	128795958	129074376	0.17949
HNRNPF	10	43881065	43904614	0.1795
IRF1	5	131817301	131826490	0.17957
IFITM3	11	319669	327537	0.17958
[truncated: 8,675 more rows]

## Sheet: F2.4.S-PrediXcan_CNS_NU
Figure 2-4. Gene-base association for UPPSP Negative Urgency using S-PrediXcan
gene name	zscore	effect size	p value	VAR_g	pred_perf_R2	pred_perf_p	pred_perf_q	SNPs Used	SNPs Covariance	SNPs Model	tissue	FDR (20%)
ACTRT3	4.36278	0.0320027	1.28e-05	0.795982	0.163086	0.000435112	0.00200625	133	133	133	Anterior Cingulate Cortex	No
UNC13B	4.16123	0.452444	3.17e-05	0.00330114	0.126483	0.00112092	0.00461895	6	6	6	Hypothalamus	No
MRPL38	4.12928	0.0880766	3.64e-05	0.123255	0.184372	6.33e-05	0.000471166	13	13	13	Hypothalamus	No
RPP25L	3.98815	0.0673418	6.66e-05	0.138973	0.154845	0.000278773	0.00159376	20	20	20	Hypothalamus	No
STRA13	-3.85456	-0.163745	0.000115939	0.0181446	0.0657499	0.0100199	0.0149916	4	5	5	Caudate	No
CDK10	-3.76665	-0.0342692	0.00016545	0.461883	0.548086	1.13e-16	8.08e-15	26	26	26	Hemisphere	No
EPB41	3.63098	0.0454424	0.000282348	0.211076	0.23904	1.17e-06	4.95e-06	27	27	27	Hemisphere	No
C7orf50	3.62777	0.123782	0.000285878	0.0456935	0.062945	0.0229956	0.0349926	8	8	8	Putamen	No
CTU2	-3.58954	-0.101472	0.000331266	0.0497859	0.0632125	0.0104133	0.00897468	7	7	7	Cerebellum	No
ZNF492	3.58785	0.0988732	0.000333414	0.0653201	0.0695051	0.0125486	0.0138411	25	25	25	Hemisphere	No
STRA13	-3.56287	-0.0411194	0.000366821	0.247126	0.447789	9.17e-14	3.4e-12	11	11	11	Cortex	No
DPYSL4	-3.54594	-0.0479369	0.000391215	0.219809	0.38198	3.52e-12	3.39e-11	16	16	16	Cerebellum	No
ART3	3.53182	0.0298271	0.000412718	0.510315	0.122643	0.000469121	0.00125451	104	105	105	Cortex	No
HCN1	3.53134	0.0936961	0.000413466	0.0738648	0.0439045	0.0450046	0.047963	29	29	29	Frontal Cortex	No
UBE2R2	3.506	0.102475	0.000454894	0.0491839	0.0831134	0.00905464	0.018684	14	15	15	hippocampus	No
FAM43B	3.49041	0.178528	0.000482288	0.0164954	0.0558538	0.016243	0.0128379	19	19	19	Cerebellum	No
KIAA1671	3.47745	0.0466027	0.000506214	0.259893	0.212813	4.53e-05	0.000336211	53	54	54	Anterior Cingulate Cortex	No
TMEM129	3.47543	0.087094	0.000510035	0.0739953	0.113317	0.00198635	0.00560013	14	14	14	Putamen	No
TSPYL5	3.47398	1.70325	0.000512806	0.000146316	0.131207	0.000825599	0.00282393	1	1	1	Putamen	No
METRN	3.43837	0.045075	0.000585232	0.216578	0.0455186	0.0368778	0.0408029	44	45	45	Cortex	No
DPYSL4	-3.43659	-0.0415903	0.000589093	0.235689	0.391334	5.6e-11	7.84e-10	14	14	14	Hemisphere	No
AKAP8L	3.43278	0.0296796	0.000597429	0.480014	0.0926694	0.00300982	0.00664449	102	106	106	Nucleus Accumbens	No
C7orf50	3.40623	0.0816473	0.000658672	0.0830475	0.0969993	0.00251118	0.00531508	13	13	13	Frontal Cortex	No
PINX1	-3.39447	-0.062996	0.000687605	0.1122	0.0633142	0.0103497	0.00893057	25	25	25	Cerebellum	No
GCC2	-3.39363	-0.0283668	0.000689739	0.551077	0.319495	7.89e-09	6.28e-08	68	68	68	Hemisphere	No
STRA13	-3.3827	-0.0617711	0.00071776	0.0991018	0.20221	6.13e-06	3.95e-05	8	8	8	Nucleus Accumbens	No
HEXDC	-3.36957	-0.0563784	0.000752864	0.147917	0.0895012	0.00214206	0.00240467	35	35	35	Cerebellum	No
C7orf50	3.36471	0.0400201	0.000766252	0.312026	0.16881	0.000337099	0.00164767	33	35	35	Anterior Cingulate Cortex	No
NELFA	-3.35871	-0.0978264	0.000783068	0.0452262	0.0606724	0.0256977	0.0379866	4	4	4	Putamen	No
FAM78A	3.34952	0.149181	0.000809531	0.0212255	0.0457982	0.0362897	0.0403075	4	4	4	Cortex	No

## Sheet: F2.5.Top10000-SNPs_UPPSP_NU
Figure 2-5. Summary statistics for the top 10,000 SNPs of the Genome-Wide Association Study (GWAS) of UPPSP Negative Urgency.
snpid	chr	bp	A2	A1	INFO	EAF	pvalue	beta	se
rs199694726	chr22	39987017	D	I	0.98031	0.6163	2.41759e-08	-0.0512102	0.00917821
rs11407181	chr22	39987024	D	I	0.98273	0.38007	7.14681e-08	0.0494562	0.00917941
rs4522708	chr22	39985283	A	G	0.98607	0.61703	8.22111e-08	-0.0490795	0.00915238
rs2003151	chr22	39991016	C	T	0.98055	0.36926	2.92823e-07	0.0474122	0.0092455
rs1109008	chr22	39991092	A	G	0.98039	0.36923	3.00664e-07	0.0473698	0.00924622
rs1250215	chr2	216253039	C	G	0.99866	0.37098	3.44108e-07	0.0465428	0.00913027
rs190107978	chr6	69831486	C	T	0.64028	0.00158	4.99534e-07	0.689183	0.137108
rs7588661	chr2	216253454	C	T	0.99997	0.62848	5.71734e-07	-0.0456137	0.00912168
rs139410543	chr18	13946751	D	I	0.98505	0.7447	6.28016e-07	-0.0508999	0.0102159
rs78719768	chr18	13946779	A	G	0.98541	0.25532	6.29627e-07	0.0508856	0.010214
rs111809907	chr18	13960563	A	G	0.93458	0.75919	6.33245e-07	-0.0534021	0.0107215
rs11663478	chr18	13970848	C	T	0.99086	0.72104	7.96297e-07	-0.0488926	0.00990472
rs6996352	chr8	4045835	C	T	0.99719	0.12451	8.50597e-07	0.066195	0.013445
rs2413602	chr22	39989216	A	G	0.96939	0.3685	9.77449e-07	0.0455053	0.00929414
rs145772967	chr7	134363926	C	T	0.53649	0.99791	9.97246e-07	-0.594238	0.121467
rs71695442	chr22	39997828	D	I	0.98131	0.64613	1.06685e-06	-0.0455484	0.00933584
rs184233482	chr6	69526970	A	G	0.66622	0.9972	1.31666e-06	-0.527694	0.109091
rs201453826	chr22	39978954	D	I	0.99368	0.4002	1.3695e-06	0.0436966	0.00904812
rs5757736	chr22	39975307	A	G	0.98254	0.60262	1.38095e-06	-0.0439921	0.00911243
rs9962309	chr18	13957128	A	G	0.99835	0.73879	1.49182e-06	-0.0485278	0.0100842
rs9951717	chr18	13957551	C	T	0.99835	0.73886	1.51889e-06	-0.048495	0.0100849
rs55657622	chr18	13958121	A	G	0.99802	0.26111	1.51939e-06	0.0485033	0.0100867
rs9965893	chr18	13958483	A	G	0.99786	0.73891	1.52069e-06	-0.0485057	0.0100876
rs57894285	chr18	13958277	C	T	0.99792	0.7389	1.52078e-06	-0.0485039	0.0100872
rs67269948	chr18	13960600	C	T	0.99746	0.26105	1.52618e-06	0.0485095	0.0100899
rs8083310	chr18	13951629	A	G	0.99985	0.26127	1.54389e-06	0.0484254	0.0100772
rs6505859	chr18	13950787	A	T	0.99987	0.26127	1.55613e-06	0.0484093	0.0100772
rs7242247	chr18	13950813	C	T	0.99993	0.73872	1.5601e-06	-0.0484031	0.010077
rs6505858	chr18	13950682	C	T	0.99993	0.73872	1.56321e-06	-0.048399	0.010077
rs28700009	chr18	13948047	A	G	1.00001	0.73872	1.60075e-06	-0.0483493	0.0100766
rs8090695	chr18	13947602	A	T	1.00002	0.73872	1.60651e-06	-0.0483416	0.0100765
rs8090246	chr18	13947303	C	T	1.00003	0.73871	1.60853e-06	-0.0483389	0.0100765
rs7235634	chr18	13965398	C	T	0.99614	0.26089	1.60877e-06	0.0484403	0.0100977
rs7240683	chr18	13966347	A	G	0.99598	0.26085	1.62103e-06	0.0484298	0.0100987
rs1941102	chr18	13967932	A	T	0.99573	0.26078	1.66497e-06	0.0483829	0.0101002
rs56851310	chr18	13948469	D	I	0.99687	0.73793	1.74958e-06	-0.0482058	0.0100842
rs66901503	chr18	13946342	A	T	0.99851	0.26121	1.82286e-06	0.0481186	0.0100834
rs9961826	chr18	13962668	A	G	0.99226	0.7402	1.83479e-06	-0.0483311	0.0101307
rs5750853	chr22	39976186	C	T	0.99582	0.40126	1.84148e-06	0.0431437	0.00904477
rs28631967	chr22	39975914	A	G	0.99398	0.40271	1.88319e-06	0.0431226	0.0090489
rs200769269	chr22	39981392	D	I	0.83843	0.29868	1.9209e-06	0.05013	0.0105282
rs199756533	chr22	39981371	D	I	0.83849	0.29869	1.94228e-06	0.0501037	0.0105276
rs7242341	chr18	13945478	A	G	0.99765	0.73871	1.95042e-06	-0.0479969	0.0100867
rs3788557	chr22	39977211	C	T	0.99935	0.40063	1.98743e-06	0.0429396	0.00903113
rs149256960	chr14	25055962	A	G	0.63636	0.97505	2.01352e-06	-0.164649	0.0346485
rs191489798	chr4	44435719	A	G	0.89113	0.996	2.03931e-06	-0.329258	0.069326
rs8139773	chr22	39975691	A	G	0.99451	0.4024	2.06705e-06	0.0429378	0.00904586
rs16941385	chr18	13943870	C	T	0.99557	0.73884	2.18987e-06	-0.0478039	0.0100959
rs118107501	chr6	111721836	C	T	0.56322	0.99188	2.21758e-06	0.309814	0.0654662
rs11110058	chr12	100210357	A	G	0.98741	0.77872	2.27728e-06	0.0506485	0.0107147
rs7485760	chr12	100209792	C	T	0.9876	0.22126	2.29299e-06	-0.0506314	0.0107142
rs189784026	chr6	69941598	G	T	0.68003	0.00243	2.34198e-06	0.530979	0.112464
rs11110060	chr12	100213163	A	C	0.98421	0.77933	2.59407e-06	0.0504822	0.0107398
rs144516841	chr7	100631176	A	G	0.91333	0.9873	2.77032e-06	-0.198503	0.0423514
rs117067533	chr7	100630040	A	G	0.9131	0.0127	2.78717e-06	0.198468	0.0423552
rs118061227	chr7	100628141	C	T	0.91289	0.9873	2.80828e-06	-0.198424	0.0423597
rs73569399	chr6	156261740	C	T	0.91392	0.0038	2.90196e-06	0.343357	0.0734056
rs1469698	chr19	38993556	C	T	1.00003	0.11458	2.96776e-06	0.0639184	0.0136785
rs59325930	chr6	156240779	C	T	0.69908	0.98898	3.02242e-06	-0.238751	0.0511335
rs199669388	chr7	100632382	D	I	0.89044	0.01308	3.05445e-06	0.197133	0.0422397
rs191624844	chr7	100622990	A	G	0.90931	0.98741	3.08801e-06	-0.198701	0.0425961
rs146662627	chr7	100623603	A	G	0.90956	0.98741	3.08927e-06	-0.19867	0.0425902
rs78092200	chr7	100616550	C	T	0.88425	0.0126	3.09842e-06	0.201477	0.0431976
rs180961678	chr5	8589329	G	T	0.62306	0.99738	3.12555e-06	-0.494153	0.10599
rs117386324	chr7	100618201	A	C	0.90205	0.98741	3.12949e-06	-0.199463	0.0427848
rs17159448	chr7	103789890	A	T	0.98684	0.99251	3.13147e-06	-0.243954	0.0523294
rs185458654	chr5	20681157	C	T	0.70269	0.99633	3.14329e-06	-0.406094	0.0871239
rs9421674	chr10	81647791	C	T	0.71438	0.89994	3.25187e-06	0.0803514	0.0172646
rs5750854	chr22	39990775	C	T	0.91002	0.25486	3.32534e-06	0.0490338	0.010546
rs5750857	chr22	40000221	G	T	0.9925	0.35995	3.3582e-06	0.0429886	0.00924988
rs58895431	chr10	71475175	A	G	0.95758	0.97014	3.37022e-06	0.125604	0.0270305
rs17108963	chr14	79686434	C	T	0.78464	0.00617	3.43858e-06	-0.287325	0.0618889
rs201327059	chr6	156252078	D	I	0.98106	0.00312	3.52002e-06	0.36287	0.0782426
rs12694363	chr2	216254032	A	G	0.99763	0.64331	3.66591e-06	-0.0426836	0.00922023
rs35011518	chr5	5905485	C	T	0.99828	0.16573	3.83843e-06	0.0551528	0.0119383
rs138219863	chr2	39326413	C	G	0.82321	0.99812	3.93824e-06	-0.524683	0.113704
rs117046983	chr14	24903614	C	T	0.68792	0.9141	3.93909e-06	-0.086987	0.0188511
rs34971736	chr5	5907286	C	T	0.99829	0.83433	4.03342e-06	-0.0550347	0.0119394
rs3788566	chr22	40006024	G	T	0.99284	0.35934	4.05801e-06	0.04264	0.00925296
rs1008677	chr22	40009336	C	T	0.99792	0.36224	4.06235e-06	0.042485	0.00921977
rs74629766	chr6	156248639	C	T	0.98035	0.99703	4.07729e-06	-0.366315	0.0795083
rs3788567	chr22	40006035	G	T	0.99289	0.35932	4.12564e-06	0.0426078	0.00925288
rs2960335	chr19	39001841	C	T	0.9999	0.10764	4.19874e-06	0.0647387	0.0140701
rs186961935	chr3	4793019	C	T	0.71386	0.00735	4.25685e-06	0.276526	0.0601368
rs926231	chr22	40006986	C	G	0.99302	0.35929	4.28152e-06	0.0425348	0.00925258
rs200655836	chr20	4604799	D	I	0.82456	0.97588	4.39508e-06	-0.146053	0.0318085
rs14879	chr8	10286273	A	G	0.97362	0.30223	4.53962e-06	-0.0443904	0.00968195
rs188900187	chr5	8709981	C	T	0.75054	0.00275	4.5926e-06	0.434279	0.0947704
rs71799331	chr22	39974015	D	I	0.87076	0.45414	4.72198e-06	0.0434781	0.00950004
rs5779769	chr1	195047988	D	I	0.98929	0.61055	4.79063e-06	-0.0414397	0.00906062
rs196698	chr6	80149183	A	G	0.99529	0.85808	4.80784e-06	-0.0575588	0.0125871
rs149719074	chr2	39161221	A	G	0.97566	0.99795	4.92045e-06	-0.455797	0.0997807
rs5757748	chr22	40010636	A	T	0.99919	0.63763	4.96802e-06	-0.0420686	0.00921351
rs11441063	chr5	171662092	D	I	0.87996	0.2238	5.07415e-06	-0.0510016	0.0111808
rs3788568	chr22	40011273	G	T	0.99993	0.36228	5.0756e-06	0.0420185	0.0092116
rs185942260	chr2	39157657	A	T	0.97962	0.00205	5.08089e-06	0.453709	0.0994701
rs2960338	chr19	39002691	C	T	0.99999	0.10777	5.14428e-06	0.0640715	0.0140549
rs35145680	chr11	113333784	A	G	0.66844	0.98913	5.14499e-06	0.230189	0.0504952
rs1323288	chr1	59246115	G	T	0.98123	0.73117	5.30736e-06	-0.0456922	0.0100376
rs139588025	chr7	100460483	C	T	0.90289	0.0109	5.51124e-06	0.208001	0.0457733
rs141238575	chr2	201337201	A	C	0.80965	0.00781	5.55986e-06	-0.249636	0.054958
rs12628643	chr22	40015493	C	T	0.9863	0.36051	5.59214e-06	0.0421931	0.00929142
rs181197695	chr5	8697313	A	G	0.72116	0.99714	5.60872e-06	-0.427803	0.0942203
rs71751650	chr22	40016767	D	I	0.92976	0.61006	5.61717e-06	-0.04274	0.00941381
rs17086845	chr6	156244988	C	T	0.9781	0.9968	5.65159e-06	-0.350701	0.0772665
rs142582132	chr4	44229489	A	G	0.67572	0.0032	5.73941e-06	0.400139	0.0882219
rs73569380	chr6	156246748	C	T	0.98358	0.00318	5.75984e-06	0.350572	0.0773063
rs145306740	chr4	44231951	C	T	0.6768	0.0032	5.76968e-06	0.399742	0.088156
rs59447988	chr6	156248488	C	T	0.9794	0.99682	5.83015e-06	-0.350557	0.0773467
rs73569387	chr6	156252894	C	T	0.97773	0.99683	5.91703e-06	-0.350686	0.0774284
rs201214259	chr6	156252075	D	I	0.98594	0.00315	5.91823e-06	0.350642	0.0774196
rs11250007	chr8	10285086	C	G	0.9758	0.69962	5.92061e-06	0.0438702	0.00968643
rs28601761	chr8	126500031	C	G	0.98161	0.41974	5.98486e-06	0.040821	0.00901772
rs17086874	chr6	156258191	C	T	0.98173	0.99685	6.06928e-06	-0.350436	0.0774651
rs12807729	chr11	113257924	C	T	0.71414	0.00858	6.12537e-06	-0.238576	0.0527609
rs17086861	chr6	156256869	A	G	0.98935	0.99687	6.1525e-06	-0.350204	0.0774633
rs78877996	chr6	156267590	A	T	0.97584	0.00316	6.1822e-06	0.350054	0.0774476
rs280290	chr6	50564505	A	C	0.99005	0.11891	6.27621e-06	0.0622833	0.0137896
rs146736984	chr17	5866478	A	G	0.65338	0.00106	6.35551e-06	0.710104	0.157311
rs1446684	chr8	27073268	A	C	0.99855	0.27051	6.49917e-06	-0.0450268	0.00998537
rs10913263	chr1	176822124	C	T	0.99271	0.3505	6.53646e-06	0.0415572	0.00921841
rs11661928	chr18	13879169	C	G	0.92115	0.74742	6.63122e-06	-0.0477834	0.0106067
rs34565766	chr1	176816462	D	I	0.99535	0.34754	6.72323e-06	0.041521	0.00922263
rs6670149	chr1	176816777	A	G	0.99796	0.6526	6.7501e-06	-0.0414642	0.00921175
rs280289	chr6	50565295	A	G	0.98817	0.1188	7.00487e-06	0.0620258	0.0138039
rs185855325	chr5	8674577	A	G	0.70672	0.00289	7.03302e-06	0.424746	0.0945455
rs73569396	chr6	156259410	A	T	0.93031	0.00375	7.04712e-06	0.333762	0.0743003
rs58442230	chr21	33754175	C	T	0.53259	0.95563	7.29389e-06	0.132155	0.0294677
rs202049194	chr14	79693478	D	I	0.90425	0.00494	7.38158e-06	-0.28612	0.0638349
rs202074796	chr22	39981394	D	I	0.7786	0.26531	7.47563e-06	0.0507321	0.0113254
rs191085490	chr4	44365159	A	C	0.86578	0.99632	7.56834e-06	-0.327349	0.0731203
rs151138964	chr2	39105005	C	G	0.96228	0.00209	7.60101e-06	0.446719	0.0998048
rs199743450	chr18	13946612	D	I	0.98891	0.74844	7.73219e-06	-0.045795	0.0102398
rs148635730	chr10	84115017	A	G	0.59636	0.01046	7.75577e-06	-0.24514	0.0548213
rs187084715	chr7	100555733	A	G	0.85268	0.98767	8.05186e-06	-0.197797	0.0443132
rs11735298	chr4	125486768	A	C	0.80837	0.77643	8.06873e-06	0.0520919	0.0116716
rs73571313	chr6	156271424	C	G	0.99341	0.9969	8.11176e-06	-0.345038	0.0773279
rs60106439	chr6	156272218	A	C	0.97179	0.9967	8.227e-06	-0.337774	0.0757512
rs187798675	chr4	44187920	C	T	0.60594	0.99756	8.26824e-06	-0.472352	0.105958
rs72837930	chr2	82856828	C	T	0.69468	0.9726	8.31134e-06	-0.144938	0.0325206
rs75174064	chr15	99539654	A	G	0.69759	0.96091	8.31241e-06	0.121937	0.0273598
rs117423803	chr10	114445979	A	G	0.97513	0.99106	8.57504e-06	-0.203597	0.0457512
rs9374728	chr6	118682621	A	G	0.71088	0.12066	8.61167e-06	0.0714459	0.0160582
rs150138861	chr1	104409110	A	G	0.3005	0.00025	8.63262e-06	1.56797	0.35246
rs13184113	chr5	171687282	C	T	0.98792	0.36648	8.63751e-06	-0.0407428	0.00915869
rs34940051	chr5	171700296	D	I	0.97903	0.36669	8.76022e-06	-0.0408859	0.00919713
rs62324494	chr4	125492103	G	T	0.83963	0.23911	8.81068e-06	-0.0498477	0.0112162
rs112422669	chr6	156215211	A	G	0.95815	0.00325	8.84809e-06	0.344238	0.0774726
rs6890637	chr5	171662203	C	T	0.99495	0.36586	8.92625e-06	-0.0405676	0.00913384
rs146553424	chr1	104442652	A	G	0.37221	0.9998	9.01803e-06	-1.55684	0.350698
rs67860906	chr5	171701562	C	G	0.97666	0.63308	9.02717e-06	0.0408694	0.0092068
rs9332410	chr5	171658287	C	T	0.99551	0.63417	9.0351e-06	0.0405333	0.00913147
rs143860881	chr4	44459176	A	G	0.88035	0.00417	9.04693e-06	0.30352	0.0683823
rs140071394	chr10	114417933	A	G	0.97136	0.00894	9.13157e-06	0.203537	0.045877
rs113625620	chr10	44144651	A	G	0.44608	0.00116	9.14953e-06	0.855091	0.192755
rs146692078	chr10	114394690	A	G	0.96496	0.99112	9.1897e-06	-0.204604	0.0461319
rs16864602	chr2	6171803	A	G	0.97096	0.00672	9.22366e-06	0.230472	0.0519736
rs12657119	chr5	171678280	A	G	0.9909	0.36618	9.22794e-06	-0.0405617	0.00914725
rs12514152	chr5	171676989	C	G	0.99148	0.36617	9.25404e-06	-0.0405473	0.00914526
rs116221476	chr2	6173491	A	T	0.97068	0.00672	9.36259e-06	0.230318	0.0519766
rs144598716	chr1	104390051	C	T	0.28496	0.00027	9.37141e-06	1.57227	0.354837
rs141351599	chr2	6163727	D	I	0.97136	0.99328	9.43781e-06	-0.230253	0.0519821
rs16864606	chr2	6173552	A	G	0.97055	0.00672	9.44735e-06	0.23022	0.0519773
rs17086790	chr6	156216944	A	C	0.93607	0.00339	9.50191e-06	0.340921	0.0769921
rs10050558	chr5	171675951	A	G	0.9893	0.63482	9.94429e-06	0.0404699	0.00915989
rs77107653	chr3	66437746	G	T	0.69332	0.01484	9.99446e-06	-0.191691	0.0433976
rs189054264	chr2	39057259	C	T	0.89952	0.99784	1.00317e-05	-0.449038	0.101678
rs142284441	chr10	114493851	A	G	0.95814	0.00901	1.008e-05	0.202625	0.0458922
rs280287	chr6	50566739	C	T	0.99469	0.11913	1.02911e-05	0.0606458	0.0137496
rs113440731	chr9	13731841	G	T	0.73311	0.00602	1.03635e-05	-0.296947	0.0673468
rs10918770	chr1	167769066	C	G	0.88998	0.54927	1.04774e-05	-0.0412406	0.00935828
rs1448657	chr7	17599269	C	G	0.9977	0.89557	1.05664e-05	0.0633256	0.0143758
rs7238998	chr18	13971047	A	G	0.98931	0.69116	1.06176e-05	-0.0423174	0.00960891
rs11108097	chr12	95935177	C	G	0.97602	0.34465	1.06985e-05	0.0413036	0.00938221
rs113635247	chr19	50737024	C	T	0.547	0.09829	1.07882e-05	0.0881309	0.0200274
rs35233997	chr2	216238970	D	I	0.9822	0.70001	1.09238e-05	-0.0426967	0.00970864
rs143056812	chr17	14018189	D	I	0.85224	0.98553	1.10605e-05	-0.173754	0.0395336
rs60876866	chr22	39981395	C	T	0.77707	0.73794	1.10695e-05	-0.0500262	0.0113827
rs117043023	chr7	103782802	C	T	0.95567	0.00623	1.11907e-05	0.25208	0.057388
rs149203520	chr13	31316313	C	T	0.52209	8e-05	1.11947e-05	2.0618	0.469394
rs17103735	chr14	24906167	A	C	0.99568	0.93547	1.12063e-05	-0.0797325	0.018153
rs140608456	chr2	39045861	C	G	0.8999	0.00212	1.12328e-05	0.449011	0.10224
rs144705921	chr17	14027919	A	T	0.85519	0.98555	1.12938e-05	-0.173465	0.0395086
rs191375723	chr9	112978012	A	T	0.9471	0.99897	1.13255e-05	0.539568	0.12291
rs28371967	chr4	148973827	A	G	0.83321	0.99777	1.13764e-05	0.437082	0.0995862
rs146356862	chr6	111588861	A	T	0.54959	0.00616	1.14838e-05	-0.329558	0.0751226
rs117082827	chr7	13858411	C	G	0.50749	0.99312	1.15384e-05	0.31397	0.0715862
rs199576429	chr5	97735807	D	I	0.62294	0.4057	1.15413e-05	-0.0497747	0.0113489
rs144716070	chr12	89803215	C	T	0.8224	0.01302	1.15959e-05	-0.183022	0.0417399
rs936395	chr17	73852116	C	G	0.98347	0.8973	1.16938e-05	0.0642052	0.0146487
rs78273629	chr6	111580590	C	G	0.54913	0.00617	1.17563e-05	-0.329239	0.0751373
rs112253169	chr17	73850080	C	T	0.98445	0.1027	1.1874e-05	-0.0641212	0.0146407
rs6556009	chr5	171676275	C	T	0.98641	0.63631	1.20829e-05	0.0401611	0.00917789
rs11659978	chr18	13970714	A	G	0.9907	0.27377	1.22892e-05	0.0435442	0.00995942
rs112875651	chr8	126506694	A	G	0.95119	0.60442	1.25774e-05	-0.0403404	0.00923735
rs191480953	chr20	41831345	A	G	0.4728	0.99916	1.26805e-05	-1.0484	0.240166
rs4516956	chr6	156212803	C	G	0.90857	0.00363	1.26834e-05	0.332153	0.07609
rs73571309	chr6	156269859	A	G	0.96667	0.00317	1.26865e-05	0.339005	0.0776606
rs138065084	chr17	32313498	C	T	0.85956	0.00746	1.2899e-05	0.249818	0.057277
rs59126276	chr17	73853515	A	G	0.98269	0.89739	1.31606e-05	0.0638798	0.0146608
rs17086808	chr6	156231726	A	C	0.98398	0.99689	1.32211e-05	-0.339944	0.0780373
rs111240185	chr1	34204976	G	T	0.52025	0.0003	1.38353e-05	1.47185	0.338651
rs34386170	chr14	40858987	C	T	0.97706	0.18528	1.39123e-05	0.049806	0.0114628
rs17703595	chr18	13975489	A	C	0.98928	0.27374	1.39671e-05	0.043288	0.0099647
rs193015776	chr12	69978169	C	G	0.52607	0.03602	1.39909e-05	-0.138754	0.0319433
rs12823146	chr12	95937604	G	T	0.98379	0.34312	1.4025e-05	0.0406511	0.00935966
rs10235298	chr7	103718097	A	C	0.87985	0.99392	1.40851e-05	-0.270471	0.0622877
rs2960337	chr19	39002614	G	T	0.9999	0.8429	1.42262e-05	-0.0523475	0.0120614
rs10215893	chr7	103721247	C	T	0.87749	0.99393	1.44013e-05	-0.270697	0.0624098
rs180683164	chr2	201430369	C	T	0.77577	0.00952	1.44253e-05	-0.220081	0.0507445
rs763216	chr22	45117434	C	T	0.98373	0.49283	1.44544e-05	0.0386946	0.0089228
rs10208323	chr2	77538129	G	T	0.87457	0.03369	1.44581e-05	0.113323	0.026132
rs148170439	chr2	39028024	A	C	0.86208	0.00219	1.44758e-05	0.447275	0.103147
rs6930247	chr6	156209988	A	G	0.90988	0.99638	1.461e-05	-0.329758	0.0760821
rs150914045	chr2	39025743	A	T	0.86073	0.00219	1.47893e-05	0.446939	0.103182
rs9341778	chr6	80168486	C	T	0.85589	0.73335	1.49199e-05	-0.0464106	0.0107193
rs2960324	chr19	38991889	C	T	0.98789	0.10818	1.49269e-05	0.0611238	0.0141179
rs140237153	chr12	8959772	A	G	0.68914	0.00196	1.4942e-05	0.516282	0.119253
rs138740781	chr18	13990165	D	I	0.69729	0.17012	1.49589e-05	0.0612378	0.0141458
rs182300369	chr21	16012244	A	G	0.89073	0.99529	1.50618e-05	-0.305931	0.0706942
rs145393816	chr2	39336204	G	T	0.6645	0.0013	1.51912e-05	0.612896	0.141689
rs4615402	chr6	156218721	A	C	0.97733	0.00313	1.52071e-05	0.337753	0.0780858
rs114856951	chr22	45063965	A	G	0.32027	0.99889	1.52352e-05	-1.08704	0.251339
rs1480058	chr11	38110400	A	G	0.8754	0.99226	1.52993e-05	0.239632	0.055418
rs16931203	chr11	38109769	C	T	0.90958	0.00815	1.53245e-05	-0.228899	0.0529402
rs140908158	chr22	40016167	D	I	0.98186	0.42301	1.53916e-05	0.0389902	0.00901974
rs17086896	chr6	156272886	A	G	0.99277	0.00322	1.55739e-05	0.328171	0.0759626
rs2861813	chr1	176813190	A	G	0.98274	0.65604	1.56057e-05	-0.0402232	0.00931157
rs149594930	chr2	39322261	C	G	0.67617	0.00131	1.56153e-05	0.603548	0.139724
rs148907843	chr7	86429936	C	T	0.72336	0.00096	1.56191e-05	0.788839	0.182622
rs4824029	chr22	49786493	A	C	0.99207	0.55828	1.57156e-05	-0.038184	0.00884267
rs10261361	chr7	103705092	C	T	0.88696	0.99387	1.57976e-05	-0.267359	0.0619315
rs68158388	chr18	13986792	A	G	0.98685	0.27339	1.58988e-05	0.0430804	0.0099825
rs143848060	chr18	13975664	D	I	0.99076	0.27356	1.60855e-05	0.0429622	0.00996105
rs34979481	chr6	56491791	C	T	0.8431	0.01261	1.61004e-05	-0.181833	0.0421612
rs200935184	chr5	171683985	D	I	0.95845	0.28092	1.63351e-05	-0.0429405	0.00996389
rs199887662	chr5	171683984	D	I	0.95844	0.28091	1.63368e-05	-0.0429404	0.00996391
rs201899948	chr12	91268650	D	I	0.72831	0.9882	1.64572e-05	-0.210221	0.0487983
rs1147857	chr6	148841752	C	T	0.99903	0.49672	1.65892e-05	0.0378836	0.00879746
rs9650651	chr8	10267540	A	C	0.99265	0.59314	1.68054e-05	0.038639	0.00897885
rs189318627	chr5	8815166	C	T	0.58338	0.00164	1.68637e-05	0.606396	0.140938
rs201095266	chr18	13990164	D	I	0.7026	0.17259	1.68735e-05	0.0602862	0.0140121
rs78693348	chr2	47768673	C	G	0.8292	0.00419	1.68892e-05	-0.301927	0.0701792
rs191379646	chr16	81910835	A	G	0.54681	0.99791	1.69438e-05	-0.567725	0.131983
rs4879832	chr9	34830432	C	T	0.9946	0.3767	1.69677e-05	0.0389987	0.00906692
rs78551866	chr7	103781210	C	T	0.9861	0.99223	1.69914e-05	-0.218817	0.0508772
rs13270601	chr8	27071767	C	T	0.99189	0.73236	1.70059e-05	0.043178	0.0100398
rs5875457	chr6	33631155	D	I	0.99821	0.46334	1.70541e-05	-0.0380796	0.00885558
rs7956923	chr12	100178650	A	G	0.97331	0.55209	1.73437e-05	-0.038517	0.00896507
rs189914131	chr17	5858534	C	T	0.59468	0.99916	1.73542e-05	-0.808062	0.188087
rs13262360	chr8	27071883	C	G	0.9908	0.26797	1.74431e-05	-0.0431269	0.010041
rs1536036	chr6	33632014	A	G	0.99987	0.53644	1.75669e-05	0.0379907	0.00884842
rs72876141	chr18	13957141	A	C	0.99528	0.75065	1.7665e-05	-0.0439934	0.0102495
rs62262640	chr3	1716723	A	C	0.91573	0.74853	1.78064e-05	0.0453648	0.0105733
rs11659671	chr18	13989860	C	G	0.9818	0.72735	1.81109e-05	-0.0429077	0.0100094
rs71477215	chr11	113448654	C	T	0.89695	0.01633	1.82119e-05	-0.152826	0.0356612
rs200691862	chr11	38431638	D	I	0.84777	0.99199	1.8296e-05	0.240377	0.0561044
rs56051246	chr18	13982686	A	G	0.99	0.2729	1.83084e-05	0.0427015	0.00996693
rs73571323	chr6	156276698	C	G	0.8866	0.99648	1.85876e-05	-0.328849	0.0768168
rs184081184	chr7	100606865	A	T	0.83994	0.01098	1.87002e-05	0.203481	0.0475467
rs73569386	chr6	156252882	A	G	0.94312	0.99646	1.89328e-05	-0.31549	0.0737669
rs190246940	chr7	14509175	C	G	0.565	0.00201	1.89752e-05	0.54587	0.127648
rs188424636	chr7	100606944	A	T	0.83959	0.98902	1.89982e-05	-0.203344	0.0475537
rs141200449	chr7	100607151	A	G	0.83941	0.98902	1.90167e-05	-0.203351	0.0475579
rs73571318	chr6	156274947	A	T	0.94673	0.9967	1.9078e-05	-0.328372	0.0768095
rs138041988	chr2	176381616	C	T	0.71809	0.01171	1.91705e-05	-0.207427	0.0485314
rs78872875	chr2	68214288	G	T	0.68575	0.00065	1.95297e-05	0.741519	0.173661
rs138857227	chr9	4300003	A	G	0.91201	0.97766	1.96075e-05	0.133368	0.0312408
rs142731103	chrX	13672528	C	T	0.48072	0.00214	1.96198e-05	-0.468534	0.109755
rs117377708	chr7	103863573	A	T	0.88809	0.99533	1.96208e-05	-0.301728	0.0706806
rs11121158	chr1	8371178	A	C	0.96155	0.77359	1.97585e-05	-0.0462091	0.0108286
rs34026507	chr18	864782	C	T	0.57879	0.96699	1.97906e-05	0.135905	0.0318504
rs62262632	chr3	1710131	C	T	0.9147	0.7496	1.99281e-05	0.0452089	0.0105989
rs185754902	chr11	38062941	A	T	0.92157	0.99187	2.00302e-05	0.224327	0.0526061
rs11459698	chr5	171657370	D	I	0.99727	0.28993	2.00683e-05	-0.0412822	0.00968188
rs1973775	chr8	8524607	A	G	0.78614	0.21975	2.00694e-05	-0.050989	0.0119585
rs5757746	chr22	40000442	A	G	0.92604	0.7536	2.036e-05	-0.0451899	0.0106064
rs1958886	chr14	40858010	A	G	0.97586	0.18471	2.04368e-05	0.0489588	0.0114932
rs146018216	chr9	113013717	A	G	0.7282	0.99885	2.05969e-05	0.565215	0.13274
rs201935047	chr2	71995750	D	I	0.34697	0.99983	2.06503e-05	-4.09002	0.96067
rs67830706	chr18	13949886	C	T	0.99845	0.25602	2.0788e-05	0.0431868	0.0101473
rs117511233	chr18	32971653	A	G	0.82978	0.98212	2.08116e-05	-0.150461	0.0353551
rs151298311	chr2	39002731	A	G	0.83281	0.99777	2.10858e-05	-0.441829	0.103891
rs11935452	chr4	114835909	A	G	0.65642	0.00011	2.11518e-05	2.43034	0.571564
rs35837368	chr11	90611401	D	I	0.99972	0.6205	2.11593e-05	-0.038627	0.0090844
rs148470528	chr1	178094087	A	G	0.59554	0.00464	2.12086e-05	0.365054	0.0858648
rs143291143	chr18	36816878	A	G	0.32103	0.99993	2.12561e-05	-15.2585	3.5894
rs72766439	chr5	83725777	A	G	0.88184	0.85592	2.12737e-05	-0.0560281	0.0131806
rs67161243	chr18	13958136	C	T	0.99704	0.74411	2.1519e-05	-0.0431422	0.0101553
rs67772102	chr18	13958261	C	T	0.99701	0.25589	2.15444e-05	0.0431402	0.0101555
rs2931039	chr18	76448893	A	G	0.99627	0.87007	2.17388e-05	-0.0552878	0.0130213
rs34088028	chr5	22716538	D	I	0.97581	0.54057	2.17508e-05	0.0382108	0.0089996
rs2175423	chr18	76449021	A	G	0.99621	0.87006	2.17896e-05	-0.0552806	0.0130212
rs141355513	chr18	36817422	C	G	0.32129	7e-05	2.18626e-05	15.2191	3.58544
rs114891325	chr2	71993719	A	G	0.34896	0.99983	2.19006e-05	-4.04065	0.952019
rs13355737	chr5	171678988	C	T	0.99431	0.28901	2.19079e-05	-0.0411759	0.00970163
rs34516854	chr11	113414196	A	G	0.9088	0.98151	2.19753e-05	0.141664	0.0333836
rs68183920	chr18	13948427	A	C	0.99862	0.74392	2.20089e-05	-0.0430482	0.0101452
rs8089923	chr18	13956317	A	T	0.99779	0.25601	2.21357e-05	0.0430545	0.0101498
rs150342633	chr11	38040541	C	G	0.92563	0.99189	2.22441e-05	0.222715	0.0525171
rs513782	chr4	116021481	A	G	0.57794	0.00823	2.233e-05	0.267055	0.0629856
rs73569346	chr6	156213430	C	T	0.98296	0.0031	2.23534e-05	0.331586	0.0782097
rs12792509	chr11	90620767	C	T	0.99911	0.37966	2.23753e-05	0.0385136	0.00908449
rs149799306	chr15	61981279	G	T	0.8592	0.99394	2.24241e-05	-0.26508	0.0625337
rs71399195	chr2	216236191	D	I	0.97641	0.7121	2.24562e-05	-0.0418703	0.00987815
rs56345632	chr14	40858946	C	T	0.97807	0.18418	2.24699e-05	0.0487116	0.0114926
rs7965588	chr12	26709529	G	T	0.72465	0.89585	2.25114e-05	0.0722967	0.0170587
rs4308574	chr6	156212776	C	T	0.9831	0.99691	2.2538e-05	-0.331423	0.0782053
rs477958	chr4	116016392	A	G	0.57578	0.99175	2.26444e-05	-0.267002	0.0630198
rs407364	chr5	123137359	C	T	0.99758	0.53921	2.27504e-05	0.0375758	0.00887111
rs202017506	chr5	171683990	D	I	0.96579	0.71397	2.27515e-05	0.0417973	0.00986776
rs113608907	chr1	26731884	A	G	0.81332	0.00502	2.27554e-05	0.301157	0.0710996
rs10777701	chr12	95935574	C	T	0.98866	0.31119	2.28655e-05	0.040533	0.00957182
rs78052803	chr4	114833289	C	T	0.76402	0.00011	2.29194e-05	2.33195	0.550757
rs56020406	chr5	171683991	C	T	0.96583	0.28601	2.30213e-05	-0.0417703	0.00986756
rs182898708	chr4	46981512	C	G	0.76394	0.99871	2.35938e-05	0.562232	0.132992
rs9858311	chr3	151182312	C	T	0.98606	0.22732	2.3655e-05	0.0447239	0.0105806
rs10864348	chr1	8373752	A	C	0.98076	0.77882	2.36928e-05	-0.0456925	0.0108106
rs192000854	chr3	170223672	C	G	0.69883	0.98563	2.3699e-05	0.186396	0.0441011
rs12658484	chr5	171658781	C	T	0.99991	0.71121	2.37001e-05	0.0408987	0.00967661
rs56035082	chr5	171683986	A	T	0.93932	0.72482	2.37678e-05	0.0427921	0.0101261
rs185825312	chr11	21233670	G	T	0.63542	0.99911	2.37895e-05	-0.938953	0.2222
rs6556005	chr5	171660754	C	G	0.99991	0.71122	2.37992e-05	0.0408895	0.00967658
rs10491493	chr5	171656863	C	T	1.00005	0.28889	2.38256e-05	-0.0408807	0.00967507
rs7732093	chr5	171657346	A	G	1.00004	0.71111	2.38349e-05	0.04088	0.00967512
rs2296338	chr6	33630816	A	G	0.99835	0.43322	2.3899e-05	-0.0375902	0.00889779
rs1110080	chr8	103069774	C	G	0.9971	0.34748	2.39189e-05	-0.0388477	0.00919585
rs11134737	chr5	171658543	A	G	0.99998	0.71111	2.39208e-05	0.0408738	0.00967549
rs11134738	chr5	171658559	A	G	0.99998	0.71111	2.39314e-05	0.0408729	0.00967552
rs6871800	chr5	171662223	C	T	0.99996	0.71122	2.39435e-05	0.0408751	0.00967629
rs6556007	chr5	171662387	A	C	0.99997	0.28878	2.39612e-05	-0.0408733	0.00967625
rs12652112	chr5	171659146	A	G	0.99997	0.28888	2.39666e-05	-0.04087	0.00967558
rs2879452	chr5	171659438	C	T	0.99996	0.71112	2.39864e-05	0.0408683	0.00967561
rs2941793	chr18	76454866	A	G	0.98699	0.86941	2.39973e-05	-0.0551141	0.0130486
rs4041423	chr5	171659667	C	T	0.99996	0.71112	2.40066e-05	0.0408665	0.00967562
rs200898812	chr5	171660436	D	I	0.99978	0.28884	2.40415e-05	-0.0408662	0.00967631
rs10047011	chrX	12626722	C	G	0.57678	0.00247	2.40498e-05	0.405659	0.0960536
rs55991850	chr18	13941800	C	G	0.97297	0.74342	2.40507e-05	-0.0433583	0.0102666
rs78469340	chr4	114833065	A	G	0.77826	0.0001	2.41306e-05	2.30901	0.546835
rs12520274	chr5	171656691	A	T	0.99963	0.71103	2.41759e-05	0.0408545	0.00967641
rs185519716	chr8	63390694	A	G	0.66988	0.99748	2.42042e-05	-0.459641	0.108873
rs183766996	chr7	145117000	A	T	0.54314	0.02182	2.42123e-05	0.166592	0.0394606
rs7999297	chr13	21122165	A	G	0.98732	0.50932	2.42388e-05	-0.0373525	0.0088482
rs2029524	chr5	171663669	C	T	1.00006	0.28887	2.42512e-05	-0.0408425	0.00967518
rs56763962	chr18	13967218	C	T	0.99552	0.25569	2.43328e-05	0.0429025	0.010165
rs257139	chr5	123138998	C	T	0.99819	0.58919	2.43364e-05	0.0378577	0.00896979
rs1982851	chr5	171664365	C	G	1.00003	0.71113	2.43456e-05	0.0408343	0.00967524
rs185684422	chr2	77506857	C	T	0.99291	0.01349	2.43809e-05	0.160021	0.0379183
rs191673940	chr2	53890635	C	G	0.783	0.00474	2.43853e-05	0.307616	0.0728925
rs2339365	chr5	171664908	A	G	0.99994	0.28878	2.43927e-05	-0.0408342	0.00967622
rs12652953	chr5	171678179	C	T	0.99942	0.28869	2.4395e-05	-0.0408425	0.00967824
rs34992334	chr3	151182294	D	I	0.98591	0.22754	2.44201e-05	0.0446384	0.0105783
rs2339366	chr5	171664947	C	T	0.99994	0.28878	2.44436e-05	-0.0408297	0.00967623
rs2046891	chr5	171686287	C	T	0.99935	0.28868	2.44451e-05	-0.04084	0.0096787
rs6898388	chr5	171672086	C	T	0.99958	0.71131	2.44561e-05	0.0408358	0.00967793
rs16924270	chr11	90611361	C	T	0.99968	0.37888	2.44945e-05	0.0383316	0.00908521
rs147722144	chr5	171662085	D	I	0.99964	0.2888	2.45124e-05	-0.0408299	0.00967772
rs4270710	chr5	171665139	A	G	0.99997	0.28887	2.47236e-05	-0.0408019	0.00967553
rs150152921	chr2	6188849	A	G	0.96222	0.99347	2.47642e-05	-0.221166	0.0524506
rs2691829	chr11	90600576	C	T	0.99993	0.37865	2.48028e-05	0.0383073	0.00908553
rs6867664	chr5	171665376	A	T	0.99995	0.28887	2.48214e-05	-0.0407935	0.00967558
rs148506613	chr7	14454213	A	T	0.5739	0.99814	2.49257e-05	-0.551542	0.130847
rs56184961	chr20	57378589	A	T	0.99364	0.18495	2.49595e-05	-0.0479294	0.0113715
rs2941799	chr18	76446802	A	G	0.99871	0.87048	2.49616e-05	-0.054886	0.013022
rs148231025	chr7	145113355	C	T	0.54248	0.0219	2.50097e-05	0.166146	0.0394232
rs12659591	chr5	171666316	C	T	0.99993	0.71112	2.50176e-05	0.0407767	0.00967568
rs142901535	chr7	1106497	A	T	0.55948	0.04894	2.50421e-05	0.11416	0.0270897
rs6873070	chr5	171665962	A	G	0.99955	0.71112	2.50584e-05	0.0407788	0.00967702
rs16924276	chr11	90611843	G	T	0.99964	0.37887	2.51014e-05	0.0382824	0.00908544
rs6009650	chr22	49779347	C	T	0.95347	0.44443	2.5165e-05	0.037972	0.00901299
rs148030225	chr5	171666823	A	G	0.9999	0.71112	2.5168e-05	0.0407639	0.00967574
rs148598548	chr2	77522046	A	G	0.99131	0.98651	2.52074e-05	-0.15973	0.0379169
rs7719156	chr5	171667278	A	G	0.99989	0.71112	2.5321e-05	0.0407509	0.00967579
rs150935385	chr2	77526479	A	G	0.99095	0.9865	2.53754e-05	-0.159588	0.0378966
rs12521828	chr5	171668327	C	T	0.9999	0.28879	2.5407e-05	-0.0407453	0.00967624
rs9611209	chr22	40047529	C	T	0.97143	0.67628	2.54071e-05	-0.0404494	0.00960597
rs186426806	chr2	77500532	A	C	0.99186	0.98651	2.54305e-05	-0.159776	0.0379456
rs149908170	chr5	171666549	C	T	0.99796	0.28832	2.54851e-05	-0.0407906	0.00968858
rs142690610	chr3	67226622	D	I	0.68816	0.92857	2.55266e-05	0.0865259	0.0205534
rs144161442	chr5	171666559	A	G	0.99796	0.71168	2.55345e-05	0.0407864	0.00968859
rs7729068	chr5	171661713	C	T	0.99704	0.28742	2.57066e-05	-0.0408338	0.00970335
rs113569525	chr18	13948086	A	G	0.99782	0.74443	2.57128e-05	-0.0427169	0.010151
rs12521646	chr5	171667568	A	C	0.99808	0.71181	2.57519e-05	0.040791	0.00969411
rs12198325	chr6	33632451	C	T	0.98529	0.51583	2.57636e-05	0.0373521	0.00887705
rs60043444	chr10	44155339	C	T	0.43367	0.00103	2.57698e-05	0.832427	0.197836
rs17074566	chr5	171668687	C	T	0.99984	0.71113	2.57757e-05	0.0407127	0.00967598
rs7718296	chr5	171657792	A	T	0.99305	0.71368	2.57913e-05	0.0409406	0.00973045
rs72876149	chr18	13958507	C	T	0.99624	0.25544	2.58091e-05	0.042747	0.0101602
rs200907351	chr3	61783264	D	I	0.75611	0.94037	2.58214e-05	0.0887259	0.021089
rs74626556	chr4	114831043	C	G	0.81117	0.0001	2.5856e-05	2.27073	0.539762
rs7194834	chr16	16021932	A	G	0.53324	0.78066	2.58601e-05	-0.0612547	0.0145606
rs28587090	chr5	171702169	C	T	0.98885	0.71109	2.58623e-05	0.040918	0.00972652
rs8016544	chr14	40845715	C	T	0.97604	0.81652	2.59182e-05	-0.0483399	0.0114921
rs55861727	chr5	171669316	A	C	0.99989	0.28888	2.59993e-05	-0.0406932	0.00967583
rs187987619	chr6	139395971	C	G	0.5636	0.00408	2.60268e-05	-0.38402	0.0913157
rs145495614	chr15	71116213	A	G	0.90532	0.98834	2.60377e-05	-0.178004	0.0423282
rs189924284	chr2	6128094	A	G	0.92592	0.99356	2.62308e-05	-0.227088	0.0540216
rs72799744	chr5	123193541	A	T	0.86692	0.75533	2.62678e-05	0.0465304	0.0110699
rs10060152	chr5	171682330	C	T	0.99986	0.71119	2.63047e-05	0.0406674	0.00967578
rs28801410	chr5	171685311	C	G	0.99991	0.71119	2.63163e-05	0.0406663	0.00967575
rs11134740	chr5	171677316	G	T	0.99992	0.71119	2.63205e-05	0.0406659	0.00967573
rs11134739	chr5	171671118	C	T	1.00005	0.7112	2.63277e-05	0.0406651	0.00967569
rs6882004	chr5	171672492	A	G	1.00002	0.7112	2.633e-05	0.0406649	0.00967569
rs114407525	chr5	171691351	A	G	1	0.71119	2.63309e-05	0.0406649	0.0096757
rs56022934	chr5	171692496	A	G	1.00001	0.71119	2.63358e-05	0.0406645	0.00967569
rs7723837	chr5	171695620	C	T	1.00004	0.28881	2.63402e-05	-0.0406641	0.00967569
rs201076992	chr5	123151902	D	I	0.9921	0.82211	2.63627e-05	0.0487821	0.0116078
rs10077514	chr5	171670723	C	T	0.99995	0.71112	2.64902e-05	0.0406516	0.00967567
rs200646043	chr7	70037442	D	I	0.96393	0.30369	2.65139e-05	0.0413108	0.00983305
rs11960881	chr5	171675546	C	T	0.99982	0.28889	2.65608e-05	-0.0406467	0.00967591
rs34284797	chr4	170008658	C	G	0.95947	0.97261	2.66135e-05	0.116188	0.0276615
rs67655291	chr17	72642694	C	T	0.99622	0.15882	2.66287e-05	0.0501769	0.0119462
rs10078784	chr5	171697610	A	G	0.99659	0.28891	2.66329e-05	-0.0406992	0.00968982
rs6882030	chr5	171672633	C	T	0.99994	0.28888	2.6683e-05	-0.0406355	0.00967563
rs118063484	chr12	89817213	A	C	0.90676	0.98546	2.66993e-05	0.158428	0.0377241
rs10059170	chr5	171673194	A	C	0.99987	0.28887	2.67201e-05	-0.0406335	0.00967587
rs10044594	chr5	171673913	C	T	0.99989	0.28888	2.67256e-05	-0.0406323	0.0096757
rs7706189	chr5	171677290	A	G	0.99984	0.28888	2.67704e-05	-0.040629	0.00967579
rs141819324	chr5	91583687	D	I	0.4521	0.99937	2.67718e-05	-1.03941	0.247535
rs28675891	chr5	171684203	A	C	0.9998	0.28887	2.67764e-05	-0.0406292	0.00967596
rs13163648	chr5	171677768	C	G	0.99983	0.71112	2.67803e-05	0.0406283	0.00967581
rs10073392	chr5	171685199	A	C	0.99982	0.28887	2.68008e-05	-0.0406272	0.00967596
rs28830473	chr5	171685730	C	T	0.99983	0.28887	2.68197e-05	-0.0406257	0.00967596
rs7735804	chr5	171680446	A	T	0.99979	0.28888	2.68224e-05	-0.0406252	0.00967589
rs10039452	chr5	171697186	C	T	0.99783	0.28887	2.68241e-05	-0.0406586	0.00968387
rs187401352	chr4	44933388	A	G	0.60375	0.00175	2.68241e-05	-0.556492	0.132543
rs7735945	chr5	171680459	C	G	0.99979	0.28888	2.6826e-05	-0.0406249	0.00967589
rs200236724	chr4	114830947	D	I	0.81108	0.9999	2.6831e-05	-2.27905	0.542822
rs141231878	chr5	171680775	D	I	0.99978	0.28888	2.6843e-05	-0.0406236	0.00967592
rs7736426	chr5	171680843	A	G	0.99978	0.28888	2.68478e-05	-0.0406232	0.00967592
rs10039416	chr5	171696878	A	G	0.99816	0.71114	2.68697e-05	0.0406483	0.00968233
rs28370519	chr5	171682274	A	G	0.99977	0.28888	2.68913e-05	-0.0406199	0.00967597
rs10061704	chr5	171682486	C	T	0.99977	0.71112	2.69048e-05	0.0406188	0.00967597
rs10053771	chr5	171682541	C	T	0.99977	0.28888	2.69154e-05	-0.040618	0.00967598
rs55962035	chr5	171683080	C	T	0.99977	0.28888	2.69345e-05	-0.0406165	0.00967599
rs144887205	chr5	171683850	C	G	0.99977	0.28888	2.69504e-05	-0.0406152	0.009676
rs28639901	chr4	77855454	C	T	0.93699	0.54365	2.69808e-05	0.0382605	0.00911558
rs10069870	chr5	171670818	C	T	0.99875	0.2891	2.69913e-05	-0.0406217	0.00967834
rs144075720	chr5	91579509	C	T	0.45157	0.00064	2.70384e-05	1.03906	0.247584
rs10042599	chr5	171687271	A	T	0.99986	0.71113	2.70605e-05	0.0406059	0.00967592
rs28545701	chr5	171687362	G	T	0.99988	0.28886	2.70708e-05	-0.0406051	0.00967592
rs35585400	chr5	171687513	D	I	0.99988	0.28886	2.70779e-05	-0.0406045	0.00967592
rs6893726	chr5	171709670	A	C	0.97173	0.7104	2.71117e-05	0.0411518	0.00980699
rs76004463	chr5	171688924	A	G	0.99989	0.28886	2.71123e-05	-0.0406017	0.00967592
rs17216658	chr19	19666025	A	G	0.60629	0.97175	2.71459e-05	0.141253	0.0336647
rs79351692	chr5	171689919	A	C	0.9999	0.71114	2.7165e-05	0.0405976	0.00967594
rs184295386	chr4	44234853	A	T	0.69018	0.00229	2.71776e-05	0.425252	0.101356
rs146888452	chr2	38989145	A	G	0.8142	0.99774	2.71777e-05	-0.438431	0.104497
rs111976502	chr5	171690524	C	T	0.99991	0.71114	2.71996e-05	0.0405948	0.00967595
rs144554120	chr6	111574711	C	T	0.55663	0.00532	2.72662e-05	-0.338086	0.0805949
rs61007968	chr2	27177428	C	G	0.98437	0.78834	2.72687e-05	0.0451993	0.0107749
rs75946992	chr5	171692708	C	T	0.99996	0.28885	2.73131e-05	-0.0405858	0.00967598
rs4541674	chr5	171696395	C	T	0.99968	0.28886	2.73302e-05	-0.0405869	0.00967656
rs10053729	chr5	171693223	A	C	0.99997	0.71115	2.73422e-05	0.0405835	0.00967598
rs7706438	chr5	171695852	G	T	1.00003	0.71116	2.73532e-05	0.0405821	0.00967587
rs12828685	chr12	100216974	C	T	0.96513	0.87616	2.74839e-05	0.0569731	0.0135874
rs111688913	chr18	13963184	C	T	0.99538	0.74468	2.7538e-05	-0.0426202	0.0101655
rs150462873	chr17	32324139	C	T	0.84898	0.99283	2.75675e-05	-0.244721	0.0583727
rs190821332	chr4	38520032	C	G	0.81217	0.0023	2.76246e-05	0.425974	0.101618
rs9313587	chr5	171698177	A	G	0.99557	0.289	2.78494e-05	-0.0406227	0.00969498
rs17159421	chr7	103788163	A	G	0.99448	0.00753	2.78914e-05	0.21606	0.0515689
rs191368582	chr2	42805439	C	T	0.51822	0.99778	2.79631e-05	-0.541313	0.129218
rs7703011	chr5	171699298	A	C	0.99459	0.28903	2.79689e-05	-0.0406317	0.00969937
rs74792775	chr1	68743008	C	T	0.8938	0.85822	2.79816e-05	-0.0559174	0.0133486
rs5866590	chr5	22752067	D	I	0.9978	0.51657	2.80271e-05	-0.0369754	0.00882755
rs7720214	chr5	171703479	G	T	0.9866	0.71082	2.8052e-05	0.0407784	0.00973595
rs10046091	chr5	171703472	A	G	0.98708	0.28916	2.80811e-05	-0.0407667	0.00973371
rs200089104	chr5	171692931	D	I	0.99531	0.28838	2.80867e-05	-0.0406386	0.00970324
rs111905738	chr10	24241246	A	C	0.79303	0.00419	2.81159e-05	-0.322046	0.0768988
rs7700481	chr5	171703697	A	G	0.98628	0.28919	2.81185e-05	-0.0407794	0.00973743
rs115177170	chr5	91587787	A	G	0.4528	0.00063	2.81291e-05	1.03934	0.248182
rs74764744	chr5	171702383	A	G	0.98918	0.71079	2.81323e-05	0.0407189	0.00972325
rs28731450	chr5	171701971	C	T	0.98989	0.71081	2.81666e-05	0.0407023	0.00971993
rs13356548	chr5	171701327	C	T	0.99122	0.28914	2.81876e-05	-0.0406752	0.00971386
rs60995369	chr5	171704427	A	T	0.98394	0.71073	2.81935e-05	0.0408169	0.0097478
rs111612266	chr12	95937877	C	T	0.9853	0.69132	2.82139e-05	-0.0402104	0.00960334
rs1566592	chr9	34839843	C	T	0.99716	0.61976	2.82661e-05	-0.0378543	0.00904154
rs10054468	chr5	171705498	A	G	0.98322	0.28929	2.8362e-05	-0.0408172	0.00975104
rs182409949	chr1	172834852	A	C	0.71356	0.99622	2.83856e-05	-0.36294	0.0867084
rs150479322	chr2	38980270	A	G	0.8102	0.99773	2.84632e-05	-0.43789	0.10463
rs112046031	chr2	201415104	C	G	0.88707	0.06943	2.84896e-05	-0.0768408	0.0183614
rs73943811	chr2	77498974	A	G	0.97783	0.98598	2.85108e-05	-0.156909	0.0374955
rs117019986	chr12	89788633	G	T	0.88998	0.01437	2.85923e-05	-0.160152	0.0382764
rs141528591	chr3	113682847	C	T	0.7774	0.98721	2.86779e-05	-0.18392	0.0439639
rs4870941	chr8	126498828	C	G	0.99225	0.77493	2.88267e-05	0.0444454	0.0106272
rs12892729	chr14	90424618	A	C	0.90272	0.37926	2.90049e-05	0.0396913	0.0094936
rs142482523	chr7	103709806	C	T	0.87655	0.99533	2.90406e-05	-0.295195	0.0706113
rs12521824	chr5	171668184	A	G	0.99752	0.71167	2.90946e-05	0.0405126	0.00969168
rs55689903	chr5	171703981	A	G	0.98561	0.71094	2.91452e-05	0.0407151	0.00974106
rs56383351	chr17	72647253	A	G	0.99424	0.84067	2.92004e-05	-0.0499005	0.0119399
rs11687442	chr2	216246210	G	T	0.99399	0.69023	2.9208e-05	-0.0401132	0.00959818
rs79318757	chr1	195536275	C	G	0.83179	0.99878	2.94858e-05	0.553468	0.1325
rs185709184	chr1	19047565	A	G	0.55392	0.00861	2.95848e-05	0.252009	0.0603421
rs76387827	chr7	100549052	C	T	0.88528	0.01082	2.96737e-05	0.194085	0.0464801
rs79540528	chr8	80210570	C	G	0.45367	0.00033	2.9691e-05	1.1466	0.2746
rs117032923	chr7	100548991	A	G	0.88537	0.01082	2.97288e-05	0.194054	0.0464774
rs145523347	chr2	39090080	C	T	0.91913	0.99771	2.97578e-05	-0.412621	0.0988312
rs146654177	chr2	38972105	C	G	0.80697	0.00227	2.9834e-05	0.437134	0.104717
rs147274571	chr4	2314747	G	T	0.64559	0.99882	2.98932e-05	0.70687	0.169352
rs6674518	chr1	8375618	C	G	0.98166	0.77768	2.98981e-05	-0.0450346	0.0107895
rs6689410	chr1	8375333	C	T	0.98111	0.22149	2.99182e-05	0.0450998	0.0108055
rs72876160	chr18	13967689	A	G	0.99485	0.2552	2.99199e-05	0.0424438	0.0101692
rs118128908	chr7	103765342	A	G	0.99123	0.9926	2.99409e-05	-0.217983	0.0522288
rs72684688	chr14	46666864	C	T	0.87428	0.84073	3.04108e-05	0.0534327	0.0128134
rs11110036	chr12	100178140	C	T	0.97005	0.44995	3.04509e-05	0.0375195	0.00899798
rs2866070	chr19	29964105	A	G	0.98384	0.74259	3.06707e-05	0.0424839	0.0101926
rs78568594	chr5	171708492	A	C	0.97565	0.28986	3.07509e-05	-0.0407685	0.00978241
rs2691828	chr11	90596836	A	G	0.99615	0.68818	3.07704e-05	-0.0398107	0.00955291
rs2915947	chr19	38992910	A	C	0.99253	0.10234	3.07786e-05	0.060171	0.0144388
rs139297856	chr2	77513942	G	T	0.99143	0.01382	3.0792e-05	0.15622	0.0374878
rs6888888	chr5	171709322	A	G	0.97221	0.2901	3.08179e-05	-0.040838	0.00980025
rs75074845	chr1	226980223	A	C	0.95118	0.95918	3.09403e-05	0.0944588	0.022673
rs72125645	chr6	156202079	D	I	0.91153	0.99638	3.09606e-05	-0.315005	0.0756137
rs36123258	chr7	70037441	D	I	0.96171	0.30193	3.11838e-05	0.0410679	0.00986179
rs1534084	chr11	90623426	A	G	0.99806	0.57944	3.125e-05	-0.0372169	0.00893809
rs11610478	chr12	100237343	C	T	0.98663	0.87536	3.13506e-05	0.055937	0.0134363
rs72954867	chr2	42010589	C	T	0.45741	0.00104	3.16151e-05	-0.902392	0.216859
rs200856962	chr4	114833658	D	I	0.56894	0.00014	3.17024e-05	2.28083	0.5482
rs74158424	chr10	123489171	C	T	0.99179	0.79076	3.17414e-05	-0.0452769	0.0108831
rs196705	chr6	80138778	C	T	0.94665	0.07103	3.18867e-05	0.0718229	0.0172682
rs143072545	chr7	100553974	G	T	0.86907	0.98912	3.20603e-05	-0.194763	0.0468406
rs1349832	chr11	44344906	A	G	0.88037	0.81768	3.21241e-05	0.0504988	0.0121463
rs6882018	chr5	22729193	A	T	0.98704	0.51214	3.22128e-05	-0.036872	0.00887001
rs6756115	chr2	77498753	A	G	0.98227	0.01395	3.2361e-05	0.155875	0.0375071
rs116139369	chr6	5530650	A	G	0.81986	0.97963	3.24221e-05	0.142106	0.0341976
rs6070616	chr20	57378295	C	G	0.99061	0.81427	3.24292e-05	0.0472521	0.0113713
rs146471595	chr19	12401494	D	I	0.91561	0.90354	3.24381e-05	0.063608	0.0153076
rs114057293	chr1	145570321	A	G	0.90069	0.98065	3.2442e-05	0.14497	0.0348882
rs6738584	chr2	77497661	G	T	0.98182	0.98605	3.26616e-05	-0.155823	0.0375138
rs151245750	chr11	95724257	A	C	0.78383	0.99031	3.2718e-05	-0.214586	0.0516656
rs7156599	chr14	40858287	A	G	0.97638	0.89835	3.29913e-05	-0.061067	0.0147098
rs1491976	chr3	151183071	C	G	0.99099	0.22694	3.30015e-05	0.0438443	0.0105613
rs112957432	chr10	24175497	A	G	0.82337	0.99559	3.30525e-05	0.304455	0.0733444
rs8013515	chr14	40857117	C	T	0.9761	0.89856	3.30859e-05	-0.0611631	0.0147352
rs11608592	chr12	100239076	C	T	0.98816	0.87533	3.31878e-05	0.0557255	0.0134275
rs10061257	chr5	22724730	A	T	0.98226	0.48981	3.33306e-05	0.0368724	0.0088868
rs10037205	chr5	171644486	A	T	0.99533	0.70229	3.33859e-05	0.0399232	0.00962296
rs146750158	chr6	58571947	D	I	0.83973	0.704	3.33899e-05	0.0435578	0.0104991
rs150697100	chr17	8644984	A	G	0.73891	0.99162	3.34423e-05	0.232181	0.0559694
rs77582931	chr7	103809532	A	C	0.99261	0.00741	3.34912e-05	0.216329	0.0521523
rs338619	chr3	28133703	A	G	0.95765	0.64351	3.35957e-05	-0.0388762	0.00937385
rs1404527	chr11	90609164	C	T	0.99999	0.315	3.36721e-05	0.0394285	0.00950822
rs1107285	chr1	8372487	A	G	0.98027	0.77808	3.37625e-05	-0.0447817	0.0108007
rs192323068	chr2	77531641	C	G	0.98902	0.98655	3.38358e-05	-0.157436	0.037976
rs8072111	chr17	72637265	A	G	0.99991	0.84112	3.39067e-05	-0.0493848	0.0119137
rs17354559	chr1	145583938	C	G	0.98611	0.02052	3.39419e-05	-0.134811	0.0325243
rs112424226	chr5	171681107	G	T	0.99891	0.71085	3.39451e-05	0.0401087	0.00967655
rs10830596	chr11	90616719	A	C	0.99801	0.58069	3.4176e-05	-0.0370696	0.00894669
rs181478556	chr2	47587280	C	G	0.93582	0.99675	3.42113e-05	0.313192	0.0755927
rs73405905	chr12	119367365	A	G	0.64912	0.99932	3.42292e-05	-0.884672	0.213533
rs74799980	chr7	103767659	C	T	0.99539	0.99257	3.43045e-05	-0.214979	0.0518957
rs117481770	chr7	103807552	A	C	0.99348	0.00742	3.43462e-05	0.215771	0.0520903
rs6888160	chr5	171708886	C	T	0.97376	0.28964	3.43725e-05	-0.0405709	0.00979485
rs35152590	chr6	33629642	D	I	0.97928	0.48443	3.44885e-05	-0.0368637	0.00890149
rs72635795	chr1	8381764	A	G	0.9873	0.77647	3.45055e-05	-0.0444425	0.0107318
rs77201428	chr8	81195298	A	C	0.9481	0.84939	3.45478e-05	-0.0522937	0.0126286
rs138302251	chr5	171654529	D	I	0.99543	0.29775	3.46373e-05	-0.0398537	0.00962579
rs143304715	chr6	5534233	A	G	0.84661	0.02141	3.48376e-05	-0.135914	0.0328376
rs9616597	chr22	49785111	A	C	0.99332	0.56013	3.48701e-05	-0.0365799	0.00883837
rs11108098	chr12	95935184	C	T	0.98273	0.69944	3.48939e-05	-0.0400354	0.00967364
rs77933994	chr2	77520573	C	T	0.98951	0.01377	3.49258e-05	0.155622	0.0376043
rs28817341	chr11	90616229	C	T	0.99946	0.31504	3.49375e-05	0.0393538	0.00950961
rs7726020	chr5	171655921	G	T	0.99793	0.29658	3.49617e-05	-0.0398137	0.00962109
rs114091998	chr7	103768903	C	T	0.99504	0.9925	3.50314e-05	-0.213663	0.0516381
rs148555199	chr2	47776385	C	G	0.7552	0.00429	3.52274e-05	-0.303954	0.0734821
rs80278438	chr7	103801841	C	T	0.99452	0.99257	3.52342e-05	-0.215247	0.0520375
rs7076556	chr10	71470654	A	G	0.96955	0.98354	3.54765e-05	0.149198	0.0360834
rs339069	chr7	128365787	A	G	0.99126	0.16496	3.55225e-05	0.0496913	0.0120187
rs78862262	chr2	77499642	C	T	0.98695	0.98616	3.55301e-05	-0.155213	0.0375413
rs201892604	chr9	35161901	D	I	0.79807	0.81376	3.55788e-05	0.0524437	0.0126855
rs148835922	chr18	32795017	G	T	0.8308	0.98072	3.57088e-05	-0.141949	0.0343427
rs3739877	chr9	34831172	A	G	0.99515	0.62679	3.57535e-05	-0.0375169	0.00907736
rs7722400	chr5	171650348	A	C	0.9938	0.2949	3.57658e-05	-0.0399227	0.00965964
rs3739876	chr9	34831144	A	G	0.99515	0.3732	3.60404e-05	0.0375006	0.00907745
rs183554260	chr7	103759563	A	T	0.98991	0.99253	3.60485e-05	-0.214336	0.051883
rs184689341	chr20	31449384	C	T	0.51498	0.00397	3.60777e-05	0.374012	0.0905389
rs79434019	chr3	166843761	C	T	0.55534	0.998	3.60822e-05	0.483479	0.117039
rs10830598	chr11	90636001	A	T	0.99457	0.57949	3.61718e-05	-0.0369949	0.00895685
rs76380355	chr1	54428329	G	T	0.8583	0.00393	3.62202e-05	-0.3139	0.0760041
rs9293036	chr5	22730468	G	T	0.99207	0.48715	3.6283e-05	0.0365232	0.00884414
rs141343309	chr16	61144269	A	G	0.53079	0.00607	3.63362e-05	-0.303017	0.073382
rs112673896	chr1	8380054	A	C	0.98601	0.22385	3.65925e-05	0.0443149	0.010736
rs10070966	chr5	22740472	A	G	0.99921	0.51381	3.67936e-05	-0.0363937	0.00881966
rs28378705	chr5	176540149	C	T	0.63896	0.00265	3.68559e-05	0.447837	0.108539
rs966133	chr1	8373305	A	G	0.98116	0.223	3.68617e-05	0.0444778	0.0107799
rs34339096	chr11	90619160	A	G	0.99923	0.68485	3.68776e-05	-0.0392322	0.00950876
rs114406933	chr7	103776816	C	T	0.9963	0.99251	3.6879e-05	-0.213088	0.0516465
rs149229208	chr2	71997867	C	T	0.32904	0.00016	3.6966e-05	4.14552	1.00489
rs79746120	chr7	103759232	A	C	0.9888	0.99252	3.69928e-05	-0.214034	0.0518848
rs7952196	chr11	90620066	A	G	0.99052	0.57626	3.69973e-05	-0.0369759	0.00896352
rs714007	chr22	49784152	A	G	0.99923	0.56055	3.70478e-05	-0.0363936	0.00882302
rs75503131	chr8	80228771	C	T	0.45761	0.99967	3.7076e-05	-1.13065	0.274119
rs7720171	chr5	22741428	A	G	0.99983	0.51376	3.70903e-05	-0.03637	0.00881786
rs6452095	chr5	22741835	A	G	1.00001	0.51372	3.73858e-05	-0.0363509	0.00881715
rs140238689	chr6	156266199	A	G	0.9575	0.99742	3.76426e-05	-0.352962	0.0856461
rs1175372	chr5	5906899	A	G	0.99558	0.80838	3.76815e-05	-0.046683	0.0113282
rs2231384	chr3	55693291	A	G	0.95854	0.81243	3.78217e-05	-0.0473079	0.0114823
rs35309034	chr8	126498265	A	C	0.99503	0.7755	3.83275e-05	0.0437368	0.0106234
rs118042671	chr7	103757989	A	T	0.98681	0.99251	3.83718e-05	-0.213647	0.051897
rs7046269	chr9	34853137	A	G	0.99026	0.62021	3.84764e-05	-0.0373491	0.00907384
rs77111418	chr7	103771622	A	G	0.99675	0.00749	3.8535e-05	0.212519	0.0516352
rs77374624	chr14	79742079	G	T	0.97973	0.00485	3.85423e-05	-0.255742	0.0621376
rs79476382	chr7	103756928	C	G	0.98599	0.0075	3.86157e-05	0.213573	0.0518975
rs148395807	chr8	63433498	A	G	0.71637	0.99748	3.86936e-05	-0.440809	0.107127
rs1175368	chr5	5908752	C	T	0.99537	0.80843	3.87092e-05	-0.0466173	0.0113294
rs186554229	chr2	54122512	C	T	0.80063	0.00505	3.87205e-05	0.287059	0.0697648
rs2296339	chr6	33630624	C	T	0.98418	0.52286	3.89074e-05	0.0365999	0.00889738
rs151105842	chr8	63434209	C	G	0.71687	0.99748	3.91076e-05	-0.440422	0.107097
rs10209662	chr2	77503661	C	T	0.9563	0.02392	3.91669e-05	0.121905	0.029646
rs4753305	chr11	90622594	G	T	0.99817	0.57826	3.92762e-05	-0.0367477	0.00893806
rs71323361	chr21	34527702	A	G	0.98613	0.14643	3.92766e-05	-0.0512033	0.0124541
rs2935707	chr10	123491375	A	G	0.99582	0.78804	3.9293e-05	-0.0444505	0.0108119
rs3826274	chr17	73910395	A	G	0.99643	0.89851	3.93e-05	0.0601512	0.0146309
rs401298	chr16	3280974	A	G	0.92229	0.60891	3.93751e-05	-0.038495	0.00936436
rs956411	chr14	40860920	C	G	0.96284	0.87916	3.93934e-05	-0.0560693	0.0136399
rs6879879	chr5	22741111	A	G	0.99969	0.51334	3.93964e-05	-0.0362385	0.0088157
rs34294459	chr11	90630998	A	T	0.99971	0.31522	3.94672e-05	0.0390674	0.00950486
rs7702915	chr5	22737441	A	T	0.99739	0.48683	3.96477e-05	0.0362676	0.00882595
rs139880879	chr8	80217894	D	I	0.45237	0.99963	3.99039e-05	-1.07869	0.2626
rs115729600	chr3	170211288	A	G	0.69491	0.98561	4.00283e-05	0.181463	0.044184
rs2066484	chr9	99064396	C	G	0.81486	0.00521	4.00301e-05	-0.281411	0.0685202
rs12339911	chr9	34845984	A	T	0.99284	0.38022	4.00556e-05	0.0372017	0.00905847
rs10129963	chr14	35663681	A	T	0.96833	0.8547	4.00861e-05	-0.0525166	0.0127882
rs77694556	chr4	114829197	A	G	0.75685	0.9999	4.00907e-05	-2.45148	0.596955
rs75024870	chr16	61150282	A	T	0.53378	0.99398	4.01051e-05	0.301516	0.0734231
rs151309818	chr5	171651262	D	I	0.99935	0.70287	4.02985e-05	0.0394702	0.00961411
rs10473608	chr5	22744473	A	G	0.99947	0.48671	4.03044e-05	0.0361967	0.00881684
rs17034776	chr2	68205611	C	T	0.65739	0.00063	4.03072e-05	0.732594	0.178447
rs8097177	chr18	13857109	C	T	0.98343	0.43771	4.03398e-05	-0.0366168	0.00891961
rs2852938	chr11	90596933	C	T	0.99582	0.40346	4.03641e-05	0.0370516	0.00902583
rs143718357	chr7	103754332	C	T	0.981	0.99246	4.04547e-05	-0.213012	0.0518965
rs7735280	chr5	22736398	C	T	0.99672	0.48686	4.04805e-05	0.0362359	0.00882855
rs7730853	chr5	22744989	C	T	0.99945	0.51328	4.05246e-05	-0.0361861	0.00881696
rs8016868	chr14	35635339	C	T	0.98538	0.14444	4.06511e-05	0.0521874	0.012718
rs13356031	chr5	171650783	C	T	0.99984	0.70275	4.07389e-05	0.0394353	0.00961151
rs148283762	chr19	58207151	C	T	0.31927	0.9999	4.0739e-05	-2.97856	0.725959
rs10777702	chr12	95935627	C	T	0.98641	0.69926	4.07484e-05	-0.0396342	0.0096601
rs10830602	chr11	90646272	A	G	0.99453	0.57567	4.07975e-05	-0.0366725	0.00893885
rs114159923	chr5	129025002	C	T	0.87393	0.00022	4.08098e-05	1.3793	0.336208
rs10073859	chr5	171649880	A	G	0.99977	0.29725	4.08399e-05	-0.0394305	0.00961168
rs4587042	chr5	22750046	A	G	0.99947	0.51326	4.08672e-05	-0.0361691	0.00881699
rs145579361	chr3	111262936	A	G	0.2503	0.00011	4.08993e-05	3.75904	0.916388
rs7444863	chr5	91631324	C	T	0.51736	0.00049	4.09906e-05	1.05016	0.256042
rs182472124	chr7	22094858	C	G	0.62541	0.99992	4.09998e-05	-3.07742	0.750326
rs10424963	chr19	29965218	A	T	0.98418	0.74452	4.109e-05	0.0419194	0.0102219
rs73022553	chr19	29964994	C	T	0.98421	0.25548	4.11201e-05	-0.041917	0.0102217
rs73571321	chr6	156275323	A	G	0.9362	0.99669	4.11631e-05	-0.316534	0.0771934
rs2088467	chr3	111263281	C	T	0.25032	0.00011	4.11774e-05	3.75759	0.916384
rs7529808	chr1	195534278	A	G	0.82035	0.00131	4.12302e-05	-0.538892	0.131432
rs73440294	chr6	50533347	A	C	0.89584	0.02774	4.13596e-05	0.117127	0.0285716
rs74917490	chr5	171647643	A	C	0.99943	0.70274	4.14105e-05	0.0394059	0.00961322
rs114043476	chr5	91603624	A	G	0.45851	0.0006	4.1468e-05	1.02899	0.251046
rs277592	chr9	34828056	C	T	0.99465	0.37295	4.15238e-05	0.0372259	0.0090828
rs10765395	chr11	90604756	C	T	0.9984	0.41836	4.15464e-05	0.0366651	0.00894623
rs715697	chr14	79769900	A	G	0.99747	0.00472	4.15751e-05	-0.254981	0.0622175
rs62201234	chr2	229191356	C	T	0.96773	0.09045	4.16113e-05	-0.0637209	0.0155492
rs737734	chr22	49784290	A	T	0.99794	0.43893	4.16273e-05	0.036174	0.00882739
rs149849609	chr5	5904867	D	I	0.98075	0.80334	4.16576e-05	-0.0463166	0.0113029
rs4679830	chr3	151168624	A	G	0.99769	0.77637	4.16627e-05	-0.0433127	0.0105699
rs10138912	chr14	35632464	C	T	0.98597	0.14443	4.16681e-05	0.0521025	0.012715
rs6574504	chr14	79767248	A	C	0.99901	0.00472	4.1814e-05	-0.254867	0.0622099
rs150904896	chr3	111257320	C	T	0.24948	0.00011	4.19342e-05	3.81542	0.931446
rs150596733	chr13	66329748	A	C	0.93437	0.00341	4.19521e-05	-0.336265	0.0820933
rs78181358	chr14	79768388	C	T	0.99622	0.99529	4.20818e-05	0.255383	0.0623582
rs34221146	chr11	90639191	C	G	0.99905	0.31527	4.22202e-05	0.0389328	0.0095082
rs13088575	chr3	151169325	A	G	0.99634	0.22373	4.22589e-05	0.0432966	0.0105745
rs10454950	chr5	5912054	C	T	0.99994	0.19836	4.22795e-05	0.0454566	0.0111023
rs10035786	chr5	171646432	C	T	0.99906	0.29708	4.23334e-05	-0.0393712	0.00961671
rs9873499	chr3	151169646	A	G	0.99591	0.22372	4.23608e-05	0.0432967	0.0105759
rs10893608	chr11	126837505	A	G	0.99943	0.75614	4.24298e-05	-0.0418568	0.0102252
rs6538642	chr12	95939491	A	T	0.9656	0.70511	4.24548e-05	-0.0401578	0.00981045
rs61911809	chr11	90634964	C	T	0.99953	0.31518	4.24707e-05	0.038909	0.00950558
rs62159626	chr2	119968837	C	G	0.96057	0.10238	4.25199e-05	-0.0607363	0.014839
rs115503541	chr2	140051815	C	T	0.68206	0.02775	4.2705e-05	-0.133922	0.0327277
rs72686613	chr14	46709260	G	T	0.87299	0.15912	4.27994e-05	-0.0524982	0.012831
rs112542415	chr2	6128649	C	T	0.95385	0.99378	4.28155e-05	-0.221496	0.0541369
rs112196783	chr17	73834380	A	G	0.97684	0.10792	4.28792e-05	-0.0587894	0.0143702
rs139685950	chr3	111267781	A	G	0.25072	0.99989	4.29322e-05	-3.74637	0.915808
rs1834624	chr4	139377761	G	T	0.99919	0.59849	4.29496e-05	-0.0369328	0.00902852
rs13235448	chr7	144544468	C	T	0.96219	0.33857	4.29923e-05	-0.0387424	0.00947141
rs141559264	chr3	111256948	G	T	0.24927	0.9999	4.30062e-05	-3.82154	0.934275
rs114768690	chr3	67237183	C	T	0.64785	0.05206	4.30368e-05	-0.100251	0.0245099
rs191765955	chr8	118150177	C	T	0.85057	0.99537	4.3185e-05	0.293267	0.0717136
rs118034268	chr11	79898579	C	T	0.88339	0.04116	4.31864e-05	-0.0986452	0.0241221
rs13151074	chr4	162381431	C	T	0.57348	0.99988	4.32558e-05	-2.65975	0.650459
rs1994329	chr11	12072694	A	G	0.82942	0.96586	4.33181e-05	-0.106395	0.0260218
rs58976230	chr17	73885952	C	T	0.99387	0.89829	4.34176e-05	0.0598612	0.0146425
rs1894134	chr11	90600944	A	T	0.99628	0.31341	4.35024e-05	0.0389791	0.00953567
rs75851257	chr5	91605358	G	T	0.46008	0.99941	4.35297e-05	-1.02744	0.251356
rs80020157	chr7	22089714	C	T	0.57192	0.00016	4.35396e-05	2.92866	0.716488
rs11381891	chr14	35631820	D	I	0.98459	0.85437	4.35534e-05	-0.0518159	0.0126768
rs143570471	chr2	110018647	G	T	0.6893	0.01814	4.35818e-05	0.164271	0.0401907
rs722297	chr5	22746695	A	G	0.99949	0.48695	4.36388e-05	0.0360408	0.00881843
rs11703684	chr22	25144912	C	T	0.99933	0.21384	4.36536e-05	-0.0439727	0.0107594
rs61911812	chr11	90635274	C	G	0.99952	0.31507	4.3696e-05	0.0388469	0.00950571
rs202161190	chr9	90534156	D	I	0.70873	0.5381	4.37293e-05	-0.0425973	0.0104239
rs74816866	chr7	103749649	C	T	0.97483	0.9924	4.38571e-05	-0.21189	0.0518596
rs72686628	chr14	46732484	A	G	0.87126	0.84099	4.38678e-05	0.0524757	0.0128435
rs7136096	chr12	95936469	C	T	0.988	0.29998	4.3964e-05	0.0394567	0.00965828
rs78461584	chr3	74905832	A	C	0.67957	0.0043	4.40693e-05	-0.325689	0.0797336
rs12655315	chr5	171644830	A	C	0.99771	0.29718	4.41476e-05	-0.0393015	0.00962258
rs79717021	chr5	91612152	A	G	0.46456	0.00058	4.42286e-05	1.03003	0.25222
rs79940043	chr5	91606913	G	T	0.46088	0.00059	4.42839e-05	1.02725	0.251557
rs188060296	chr16	61380697	C	G	0.63818	0.99572	4.43366e-05	0.319571	0.0782628
rs61911811	chr11	90635217	C	T	0.9996	0.68483	4.44342e-05	-0.0388079	0.00950523
rs73355708	chr17	73935233	G	T	0.99851	0.89852	4.44537e-05	0.0596592	0.0146127
rs17086783	chr6	156205583	A	G	0.98188	0.0031	4.45705e-05	0.31824	0.0779602
rs116281208	chr5	91612244	A	C	0.4647	0.99942	4.45916e-05	-1.0297	0.252256
rs140311266	chr17	73820601	D	I	0.98873	0.12812	4.46369e-05	-0.054371	0.0133206
rs196703	chr6	80142547	C	T	0.98319	0.93028	4.46906e-05	-0.0701213	0.0171805
rs1404526	chr11	90608217	A	G	0.9999	0.40726	4.47862e-05	0.0367127	0.0089961
rs1404525	chr11	90608199	A	G	0.99986	0.40727	4.47929e-05	0.0367131	0.00899627
rs10777703	chr12	95938336	G	T	0.98858	0.69736	4.47984e-05	-0.0393219	0.00963561
rs12652736	chr5	171643798	C	T	0.99788	0.70316	4.47992e-05	0.0392766	0.00962451
rs146288226	chr17	5301362	G	T	0.8319	0.02206	4.49106e-05	-0.129706	0.0317883
rs118168758	chr12	89777840	C	T	0.87061	0.01426	4.50869e-05	-0.158545	0.0388648
rs149142388	chr1	195530487	G	T	0.83288	0.00128	4.51712e-05	-0.535108	0.131187
rs75980759	chr16	61206600	A	C	0.56505	0.99439	4.53078e-05	0.300209	0.0736119
rs73684524	chr8	64007368	C	T	0.61446	0.00249	4.53489e-05	0.453004	0.111083
rs142098954	chr7	103746623	D	I	0.96601	0.00771	4.53556e-05	0.210893	0.0517146
rs186147344	chr1	195530485	A	G	0.8329	0.00128	4.54335e-05	-0.534834	0.131163
rs1838803	chr2	215610740	A	T	0.5177	0.91851	4.55178e-05	-0.0901877	0.02212
rs1161404	chr6	50593406	A	G	0.95434	0.08631	4.56325e-05	0.065845	0.0161519
rs112094077	chr2	205122814	C	T	0.81664	0.00642	4.56992e-05	-0.263542	0.0646528
rs2056622	chr11	90545513	C	T	0.9589	0.34866	4.57331e-05	0.0384196	0.00942558
rs79446545	chr5	171645362	A	C	0.99874	0.70285	4.5787e-05	0.0392027	0.00961835
rs252161	chr5	150078956	A	G	0.99744	0.27563	4.61656e-05	-0.0398406	0.00977947
rs2936867	chr10	123489061	A	C	0.99571	0.21202	4.62609e-05	0.0439825	0.0107974
rs142961058	chr3	67243337	A	G	0.64545	0.94823	4.62659e-05	0.100305	0.0246243
rs6571698	chr14	35647216	G	T	0.9787	0.14501	4.63783e-05	0.0518794	0.0127379
rs10272494	chr7	87820097	G	T	0.85042	0.43228	4.65291e-05	-0.0391664	0.00961827
rs143762728	chr5	91609046	D	I	0.46172	0.00059	4.65361e-05	1.02518	0.25176
rs202084384	chr12	95936869	D	I	0.98254	0.70143	4.65459e-05	-0.0394862	0.00969703
rs141927280	chr5	91614206	G	T	0.46619	0.00058	4.65792e-05	1.02851	0.252592
rs35471482	chr22	39993669	A	G	0.94854	0.5257	4.65885e-05	0.0368783	0.00905704
rs75751482	chr7	22089925	A	G	0.57707	0.99984	4.66425e-05	-2.92809	0.719164
rs77682250	chr16	61191780	A	C	0.56315	0.99444	4.66927e-05	0.301592	0.0740784
rs75511450	chr3	67258761	A	C	0.64507	0.94845	4.66951e-05	0.10056	0.0247001
rs35293780	chr18	13916229	C	T	0.99476	0.21713	4.67197e-05	0.0439596	0.0107979
rs4398150	chr17	73888273	C	T	0.9953	0.10147	4.68369e-05	-0.0596178	0.0146461
rs4393098	chr1	3779680	C	T	0.93957	0.9466	4.68723e-05	-0.0832062	0.0204419
rs6571701	chr14	35648101	C	T	0.97883	0.85505	4.69778e-05	-0.051846	0.0127391
rs143772257	chr7	103748406	A	G	0.97221	0.00763	4.71711e-05	0.210854	0.051821
rs7294704	chr12	95936891	C	G	0.98641	0.69924	4.71772e-05	-0.0393022	0.00965928
rs8140771	chr22	40049592	A	G	0.97761	0.67835	4.72263e-05	-0.0389992	0.00958538
rs12677676	chr8	126502526	A	G	0.99831	0.22437	4.72362e-05	-0.0431531	0.0106065
rs72631106	chr10	123489598	G	T	0.99639	0.2117	4.7256e-05	0.0439577	0.0108045
rs150682464	chr7	103748332	C	T	0.97202	0.99237	4.7322e-05	-0.210805	0.0518185
rs2545458	chr8	140659448	A	G	0.87396	0.74845	4.75703e-05	-0.0441824	0.0108638
rs112095845	chr8	81182063	A	C	0.98555	0.16447	4.75756e-05	0.0487886	0.0119965
rs35042918	chr9	35060127	D	I	0.98504	0.51047	4.75877e-05	0.036196	0.00890028
rs6571699	chr14	35647392	A	G	0.97881	0.85501	4.76046e-05	-0.0518016	0.0127378
rs4475689	chr1	3779644	C	T	0.9399	0.05338	4.76061e-05	0.0831378	0.0204433
rs2834113	chr21	34527885	G	T	0.99978	0.85171	4.76359e-05	0.0500791	0.0123147
rs12430	chr17	73941955	A	G	0.99962	0.89855	4.76636e-05	0.0594027	0.0146079
rs10425849	chr19	29965615	G	T	0.98292	0.74395	4.77594e-05	0.0415514	0.0102193
rs180851533	chr3	175306538	C	G	0.83747	0.9951	4.78576e-05	0.260832	0.064157
rs7786323	chr7	144547130	C	G	0.97101	0.65552	4.79524e-05	0.0382169	0.00940131
rs11959293	chr5	171644409	C	T	0.99833	0.29709	4.79617e-05	-0.0391098	0.00962109
rs143904428	chr7	103747631	D	I	0.97138	0.99236	4.80058e-05	-0.210593	0.051809
rs13157177	chr5	122829511	C	G	0.95548	0.91677	4.80961e-05	-0.0662856	0.016309
rs17096109	chr10	123489645	A	G	0.99626	0.78842	4.81077e-05	-0.0439234	0.0108071
rs1038780	chr5	171639487	C	T	0.99513	0.70292	4.83966e-05	0.0391362	0.00963257
rs10854362	chr21	34529112	G	T	0.9924	0.85175	4.84317e-05	0.0502454	0.0123674
rs7274653	chr20	57375632	A	G	0.98832	0.814	4.84409e-05	0.0462649	0.0113878
rs73066227	chr1	195531325	C	T	0.82208	0.99867	4.84945e-05	0.531868	0.130924
rs79189896	chr7	103794162	A	G	0.97726	0.9928	4.85629e-05	-0.217121	0.0534504
rs115412555	chr1	54533121	C	T	0.90793	0.99611	4.85728e-05	0.303699	0.0747648
rs2936865	chr10	123488385	C	T	0.99557	0.21173	4.85739e-05	0.0439087	0.0108095
rs150409158	chr5	154410921	D	I	0.98202	0.97726	4.85831e-05	-0.120888	0.0297606
rs1013061	chr21	34529041	C	T	0.98837	0.85512	4.85876e-05	0.0507353	0.0124903
rs78606879	chr14	79741345	C	T	0.9668	0.00501	4.86287e-05	-0.251193	0.061843
rs10024846	chr4	116088868	A	G	0.63047	0.00744	4.86771e-05	0.25746	0.0633894
rs6505848	chr18	13848212	A	G	0.99386	0.43393	4.86794e-05	-0.0360665	0.00888001
rs184897297	chr1	111885655	A	G	0.44849	0.00027	4.8744e-05	-1.69797	0.418093
rs225923	chr14	30535362	A	G	0.81478	0.04608	4.87547e-05	0.0959633	0.0236294
rs111605243	chr11	90613775	C	T	0.99812	0.31301	4.88865e-05	0.0387121	0.0095337
rs145388877	chr14	58070017	A	T	0.58779	0.0022	4.8893e-05	0.52604	0.12955
rs58332692	chr22	45426774	D	I	0.86316	0.30112	4.90178e-05	0.0420086	0.0103471
rs10070834	chr5	171636339	C	T	0.98935	0.2967	4.9018e-05	-0.0392221	0.00966079
rs926334	chr22	40045210	G	T	0.97637	0.3208	4.91103e-05	0.0389874	0.00960402
rs17086780	chr6	156204351	A	G	0.98467	0.99691	4.91202e-05	-0.316174	0.0778861
rs7272283	chr20	57374138	G	T	0.99002	0.18596	4.91485e-05	-0.0462091	0.0113835
rs201135510	chr22	45426773	D	I	0.8631	0.30113	4.9178e-05	0.0420021	0.0103475
rs76848941	chr2	125194676	G	T	0.54989	0.00095	4.91864e-05	0.885021	0.218033
rs2016273	chr12	31169728	A	G	0.98273	0.73669	4.92022e-05	0.0407759	0.0100457
rs62262605	chr3	1708277	C	T	0.86955	0.74931	4.92248e-05	0.0440773	0.0108593
rs116277158	chr5	91618007	A	G	0.46862	0.99943	4.92612e-05	-1.02677	0.252976
rs75087830	chr16	61226475	A	G	0.56807	0.00559	4.92801e-05	-0.298304	0.0734977
rs10972311	chr9	35097876	G	T	0.99513	0.7564	4.93817e-05	-0.0414981	0.0102258
rs196702	chr6	80145117	C	T	0.99861	0.07075	4.9491e-05	0.0686532	0.0169193
rs132582	chr22	39988175	C	T	0.94579	0.56603	4.96618e-05	-0.0370838	0.00914097
rs1614363	chr10	123487755	C	G	0.99541	0.21173	4.9701e-05	0.0438554	0.0108106
rs6863095	chr5	171642537	C	T	0.99814	0.70296	4.97145e-05	0.0390356	0.00962267
rs182169428	chr2	47604661	C	T	0.97849	0.00317	4.98246e-05	-0.303965	0.07494
rs74828179	chr14	79686426	A	G	0.80032	0.99476	4.98292e-05	0.269315	0.0663978
rs6556003	chr5	171640789	C	T	0.99778	0.70297	4.99059e-05	0.039033	0.00962416
rs2339364	chr5	171640854	A	G	0.99794	0.29703	5.00193e-05	-0.0390255	0.00962358
rs200687897	chr13	45894469	D	I	0.56695	0.00262	5.00556e-05	-0.467888	0.115385
rs7829975	chr8	8548117	A	T	0.99786	0.48116	5.01559e-05	-0.0356171	0.00878446
rs132580	chr22	39984946	C	T	0.98566	0.45283	5.02124e-05	0.0361285	0.00891115
rs8180991	chr8	126500350	C	G	0.99754	0.22423	5.02946e-05	-0.0430372	0.0106162
rs184142914	chr2	77554280	C	G	0.96408	0.98595	5.03001e-05	-0.15235	0.0375812
rs74499409	chr14	79758021	A	G	0.99419	0.00471	5.04504e-05	-0.252781	0.0623658
rs201297727	chr16	61248344	D	I	0.58064	0.99456	5.05112e-05	0.298191	0.0735744
rs2931035	chr18	76454021	A	G	0.98722	0.12919	5.05916e-05	0.053047	0.0130898
rs71320287	chr21	34527507	D	I	0.98604	0.14393	5.0697e-05	-0.0509031	0.0125623
rs12968854	chr18	13849364	A	G	0.99646	0.56617	5.08524e-05	0.0359307	0.00886886
rs142006178	chr7	103858158	A	G	0.95392	0.0072	5.09273e-05	0.218945	0.0540473
rs138981294	chr7	22089086	A	G	0.56801	0.99984	5.10077e-05	-2.89154	0.713852
rs62201232	chr2	229182531	A	C	0.99636	0.90641	5.10141e-05	0.0612398	0.0151187
rs11134132	chr5	5913248	C	T	0.99416	0.1989	5.10194e-05	0.045048	0.0111214
rs35559918	chr11	90644978	A	G	0.99865	0.68463	5.10513e-05	-0.0385104	0.00950774
rs141066671	chr10	24728177	A	G	0.84739	0.0284	5.10825e-05	-0.118783	0.0293271
rs9616596	chr22	49783150	C	G	0.98514	0.55695	5.1134e-05	-0.0359378	0.00887344
rs1615610	chr10	123489800	C	T	0.99446	0.78841	5.11368e-05	-0.0437843	0.0108109
rs2858053	chr16	145325	A	G	0.89383	0.84442	5.12715e-05	-0.0521595	0.0128808
rs79851764	chr7	87744682	A	G	0.9492	0.02794	5.13597e-05	0.110253	0.0272297
rs62140879	chr2	47765198	A	G	0.95037	0.02528	5.13605e-05	-0.114547	0.0282901
rs2511319	chr11	90599757	A	G	0.99841	0.40598	5.14492e-05	0.0364574	0.00900494
rs41305313	chr9	34832558	C	G	0.99809	0.37617	5.14595e-05	0.0366455	0.00905149
rs149348371	chr7	22089154	C	T	0.56888	0.99984	5.15021e-05	-2.89086	0.714081
rs145177418	chr20	57373613	D	I	0.99122	0.18569	5.16491e-05	-0.0460787	0.0113839
rs77545857	chr22	45425890	C	T	0.82528	0.15071	5.17137e-05	0.0547399	0.0135247
rs35411831	chr5	5907655	C	G	0.99388	0.19081	5.17711e-05	0.0459455	0.0113526
rs7786006	chr7	144546971	A	G	0.97385	0.65359	5.17968e-05	0.0379556	0.00937862
rs61911810	chr11	90635074	A	G	0.9977	0.68361	5.18985e-05	-0.0384514	0.00950222
rs115073157	chr4	78294567	A	G	0.56513	0.99758	5.20541e-05	-0.45777	0.113145
rs139466414	chr5	150769200	C	T	0.54037	0.99979	5.20693e-05	-1.47171	0.363762
rs60747420	chr14	35800928	C	T	0.94409	0.9112	5.21388e-05	-0.0653662	0.0161578
rs132575	chr22	39982721	A	G	0.98763	0.54732	5.22714e-05	-0.0360177	0.00890449
rs6464622	chr7	144542022	C	T	0.97182	0.3446	5.25492e-05	-0.0379945	0.0093961
rs9510515	chr13	23577006	G	T	0.98908	0.25093	5.25817e-05	-0.0413388	0.0102235
rs2852939	chr11	90597290	C	G	0.99364	0.59585	5.28982e-05	-0.0365077	0.00903186
rs148841310	chr3	88100725	D	I	0.73424	0.99352	5.3108e-05	0.259524	0.0642201
rs72973202	chr4	162373854	C	T	0.5771	0.99989	5.31445e-05	-2.66033	0.658333
rs60480221	chr7	144540395	A	G	0.9667	0.65705	5.31573e-05	0.0381127	0.00943162
rs60852972	chr5	150770191	C	G	0.53962	0.99979	5.31812e-05	-1.46943	0.363645
rs2935706	chr10	123491668	C	G	0.99874	0.78836	5.32115e-05	-0.0436021	0.0107907
rs145561677	chr21	34527567	D	I	0.98686	0.85676	5.32671e-05	0.0508557	0.0125866
rs2162337	chr4	139377059	A	T	0.99592	0.39996	5.34371e-05	0.0365214	0.00904058
rs184836744	chr4	16001934	C	T	0.98026	0.9951	5.34736e-05	-0.25448	0.0629969
rs143616353	chr7	103746311	D	I	0.96926	0.99234	5.36096e-05	-0.209039	0.0517556
rs62226101	chr21	34529506	A	G	0.97578	0.1427	5.36266e-05	-0.0510255	0.0126336
rs4636744	chr12	3712510	C	T	0.99153	0.66271	5.37171e-05	-0.0378114	0.00936276
rs80045150	chr3	111254965	A	G	0.24917	0.0001	5.37397e-05	3.84664	0.952516
rs61974552	chr13	93641454	A	C	0.98637	0.23179	5.38375e-05	0.0427351	0.0105833
rs79822800	chr14	79729394	C	T	0.98084	0.0048	5.39603e-05	-0.252233	0.0624736
rs34087092	chr8	126504762	A	G	0.99625	0.77464	5.42071e-05	0.0427821	0.0105992
rs1524959	chr11	90641607	A	C	0.99912	0.57855	5.4237e-05	-0.0360557	0.008933
rs138813672	chr9	6455130	D	I	0.93572	0.91943	5.42807e-05	-0.0673164	0.0166788
rs72081219	chr11	90635716	D	I	0.99785	0.68403	5.42873e-05	-0.0383724	0.00950749
rs73861533	chr4	162374118	C	T	0.57748	0.00011	5.43631e-05	2.65653	0.658259
rs192385896	chr7	103807670	C	T	0.70255	0.99222	5.4392e-05	0.240123	0.0595016
rs7621591	chr3	151171542	A	G	0.99948	0.77192	5.44348e-05	-0.0423587	0.0104968
rs7587968	chr2	216943032	A	G	0.99601	0.3961	5.444e-05	-0.0363908	0.00901798
rs11605879	chr11	90641247	C	T	0.99998	0.68436	5.46825e-05	-0.0383473	0.00950529
rs12964057	chr18	13927714	A	G	0.97009	0.792	5.47861e-05	-0.0448205	0.011111
rs79063794	chr3	175454526	C	T	0.42425	0.00089	5.48193e-05	-1.07964	0.267655
rs75828346	chr7	103862086	C	T	0.955	0.99276	5.49244e-05	-0.216859	0.0537674
rs277617	chr9	34779791	C	T	0.97826	0.37394	5.4986e-05	0.0369631	0.00916514
rs6759895	chr2	156138366	A	G	0.94972	0.71312	5.50055e-05	0.0406069	0.0100688
rs2489163	chr9	87321442	G	T	0.89823	0.53652	5.50758e-05	-0.0377417	0.00935909
rs139208799	chr18	13933459	D	I	0.95733	0.20946	5.52475e-05	0.0449275	0.011143
rs150311342	chr5	150772996	C	T	0.54226	0.99979	5.54946e-05	-1.46601	0.363697
rs55639127	chr3	175294379	C	T	0.83111	0.00558	5.55899e-05	-0.243923	0.0605201
rs172791	chr16	3295219	C	T	0.99372	0.54092	5.57419e-05	-0.0357087	0.00886114
rs657279	chr6	50563098	A	C	0.98825	0.09614	5.58209e-05	0.0608752	0.0151075
rs1867654	chr14	76937722	A	T	0.97044	0.6115	5.58274e-05	-0.0367816	0.00912822
rs76552075	chr6	115119278	C	T	0.67519	0.01156	5.58309e-05	0.207536	0.051505
rs224209	chr16	3297853	A	C	0.98705	0.45927	5.58587e-05	0.0358019	0.00888535
rs79142795	chr3	67270889	A	G	0.64171	0.05173	5.5864e-05	-0.0994997	0.0246941
rs184282168	chr2	77535206	C	T	0.98792	0.98652	5.59486e-05	-0.153074	0.0379937
rs224211	chr16	3298642	A	G	0.98609	0.45914	5.59982e-05	0.0358145	0.00888978
rs115595883	chr3	60852560	C	T	0.58842	0.99239	5.62002e-05	0.256172	0.0635997
rs6805027	chr3	28154953	A	G	0.96608	0.35773	5.62061e-05	0.0375863	0.00933159
rs224212	chr16	3298865	C	T	0.98546	0.45913	5.62806e-05	0.0358151	0.00889254
rs2936875	chr10	123491643	G	T	0.99961	0.7883	5.63377e-05	-0.0434325	0.0107845
rs148287722	chr5	150773984	C	T	0.54386	0.00021	5.63569e-05	1.46357	0.36342
rs66774162	chr12	47800605	C	T	0.97878	0.1274	5.64115e-05	0.053	0.0131612
rs78759751	chr14	56079985	A	G	0.44394	0.99988	5.65017e-05	-2.80902	0.697612
rs2122435	chr14	79792688	C	G	0.93041	0.9945	5.65054e-05	0.239702	0.0595296
rs185302627	chr7	76138755	A	G	0.6719	0.00456	5.67292e-05	0.322546	0.0801221
rs200754641	chr17	73884441	D	I	0.99425	0.89867	5.67672e-05	0.059017	0.0146607
rs73066223	chr1	195525915	C	T	0.83268	0.99869	5.69046e-05	0.524143	0.130223
rs885451	chr9	34997569	C	G	0.99312	0.49099	5.69258e-05	-0.0357079	0.00887184
rs114348699	chr4	178905626	A	C	0.38319	5e-05	5.69595e-05	2.3117	0.574374
rs182673	chr16	3295236	C	T	0.99465	0.45937	5.70845e-05	0.0356439	0.00885739
rs145459064	chr17	4955924	C	T	0.79463	0.02442	5.71752e-05	-0.12435	0.0309035
rs74483162	chr1	195525704	C	G	0.8351	0.00131	5.7193e-05	-0.523853	0.13019
rs115595267	chr2	140044485	C	T	0.67973	0.97206	5.72203e-05	0.131499	0.0326815
rs77864025	chr2	239082835	A	G	0.72094	0.02164	5.7258e-05	-0.145242	0.0360984
rs1896986	chr6	51908975	C	G	0.74624	0.00032	5.72922e-05	-1.01415	0.252067
rs1231124	chr16	3294678	A	G	0.99966	0.53959	5.73066e-05	-0.0355566	0.00883769
rs61278971	chr6	50562337	D	I	0.98755	0.09615	5.74287e-05	0.0607906	0.0151116
rs13271368	chr8	126506140	C	T	0.99469	0.22397	5.75986e-05	-0.0427726	0.0106344
rs170384	chr16	3295385	C	T	0.9933	0.54029	5.78264e-05	-0.0356387	0.00886278
rs1231122	chr16	3293888	C	T	0.99995	0.4604	5.79152e-05	0.0355324	0.00883713
rs224203	chr16	3295714	C	T	0.99335	0.45938	5.8019e-05	0.0356298	0.00886229
rs35954650	chr18	13935165	C	T	0.95707	0.20963	5.81306e-05	0.0447844	0.0111406
rs141255996	chr6	5503951	C	T	0.84729	0.97858	5.81395e-05	0.131838	0.0327964
rs224234	chr16	3291970	A	C	1.00004	0.46033	5.8242e-05	0.0355198	0.00883692
rs35699028	chr18	13934721	A	G	0.95739	0.79035	5.8264e-05	-0.0447701	0.0111385
rs2741918	chr16	3292874	C	T	0.99988	0.53966	5.83434e-05	-0.0355199	0.00883786
rs145868518	chr10	92419854	A	G	0.72435	0.01437	5.83773e-05	0.169068	0.042068
rs56005213	chr16	16039007	C	T	0.98794	0.69962	5.87668e-05	-0.0387964	0.00965718
rs7708785	chr5	151385497	A	G	0.30872	0.0001	5.91825e-05	6.42157	1.59912
rs73354053	chr17	73884390	C	T	0.995	0.10118	5.93333e-05	-0.0588743	0.0146632
rs112820324	chr2	229184655	D	I	0.99702	0.09353	5.93667e-05	-0.0606949	0.0151172
rs114736782	chr5	8642268	A	T	0.60711	0.00361	5.93667e-05	0.363463	0.0905271
rs4753304	chr11	90615886	A	T	0.9978	0.44574	5.93798e-05	0.0357196	0.00889674
rs58710823	chr1	211216524	A	T	0.54182	0.00046	5.94777e-05	1.05794	0.263529
rs76022246	chr5	91705082	A	C	0.55138	0.00045	5.94837e-05	1.03403	0.257575
rs10752724	chr1	3781136	C	G	0.90388	0.94639	5.95308e-05	-0.083389	0.0207729
rs7709397	chr5	91759160	C	T	0.79242	0.00046	5.95441e-05	0.906704	0.225871
rs72480874	chr7	87760983	D	I	0.96259	0.97127	5.95542e-05	-0.107047	0.0266669
rs76274439	chr2	67127073	C	T	0.98859	0.94131	5.95863e-05	-0.0748505	0.0186469
rs72966197	chr11	90622804	C	G	0.96434	0.85934	5.97428e-05	-0.0516791	0.0128764
rs17209415	chr11	90625415	C	T	0.99505	0.3127	5.97648e-05	0.0383403	0.00955309
rs16824642	chr2	229183017	A	G	0.99878	0.90653	6.00692e-05	0.0606272	0.0151107
rs191799613	chr11	112446385	A	C	0.53193	0.99485	6.01169e-05	0.341375	0.0850885
rs201661605	chr12	55753372	D	I	0.65619	0.98524	6.03446e-05	-0.1793	0.0447009
rs79615026	chr3	67215350	G	T	0.64803	0.95024	6.05325e-05	0.100886	0.0251562
rs145913164	chr11	42517272	D	I	0.79407	0.99724	6.05769e-05	-0.392781	0.0979453
rs148699478	chrX	6695742	A	G	0.55732	0.00204	6.06227e-05	-0.399079	0.0995203
rs116153889	chr2	140037965	C	T	0.68054	0.02781	6.07425e-05	-0.13132	0.0327518
rs8012774	chr14	35661293	A	G	0.99881	0.90842	6.08478e-05	-0.0621138	0.015493
rs190184974	chr8	89240367	A	G	0.80024	0.9945	6.08638e-05	-0.26114	0.0651369
rs191254003	chr9	128503942	A	C	0.68727	0.002	6.09398e-05	0.491746	0.122667
rs12960399	chr18	13914498	A	G	0.99527	0.78285	6.09685e-05	-0.0432701	0.0107941
rs75514019	chr10	114515219	A	G	0.96322	0.92886	6.10554e-05	-0.0700011	0.0174638
rs11466028	chr16	3297551	D	I	0.97944	0.46201	6.12556e-05	0.0357403	0.0089182
rs6070607	chr20	57368374	G	T	0.99908	0.18512	6.14669e-05	-0.045529	0.0113631
rs224207	chr16	3297175	C	T	0.98977	0.45915	6.15245e-05	0.0355474	0.00887235
rs17086768	chr6	156200940	C	T	0.99604	0.0031	6.15521e-05	0.30927	0.0771934
rs73354050	chr17	73883992	C	T	0.99382	0.89893	6.15899e-05	0.0587984	0.0146765
rs6895877	chr5	123144113	A	G	1	0.30889	6.16084e-05	0.0382654	0.0095515
rs137892485	chr3	19358087	A	T	0.63388	0.00593	6.16389e-05	-0.297649	0.074299
rs6070608	chr20	57368464	A	C	0.99958	0.81486	6.16674e-05	0.0455066	0.0113596
rs148161852	chr14	29270369	D	I	0.78324	0.55457	6.17096e-05	0.0397514	0.00992339
rs11019216	chr11	90609904	A	C	0.93094	0.35975	6.1772e-05	0.0380966	0.00951086
rs200278162	chr6	111608779	D	I	0.56319	0.97398	6.1797e-05	0.14624	0.0365098
rs80152496	chr3	175456517	A	G	0.42309	0.00089	6.1814e-05	-1.08373	0.270567
rs145936956	chr6	80575198	A	C	0.56231	0.99972	6.19216e-05	-1.53142	0.382376
rs499365	chr6	50586387	A	G	0.99397	0.11674	6.19244e-05	0.0555153	0.0138615
rs183411454	chr6	114632400	A	G	0.80143	0.99341	6.22367e-05	-0.252324	0.0630208
rs142286874	chr3	47309699	C	G	0.22924	6e-05	6.22801e-05	2.70311	0.675161
rs56077127	chr14	29270371	D	I	0.7805	0.55429	6.25612e-05	0.0397822	0.00993912
rs146204957	chr5	128887920	A	G	0.62685	0.00017	6.26365e-05	1.69799	0.424253
rs777709	chr8	8583872	C	T	0.99974	0.4672	6.26409e-05	-0.0350003	0.00874508
rs147615298	chr2	79763701	D	I	0.96728	0.70147	6.2706e-05	-0.0392309	0.00980272
rs10428368	chr4	188403212	C	T	0.81643	0.99818	6.30048e-05	-0.429988	0.107472
rs2741919	chr16	3292896	C	T	0.99958	0.53952	6.31407e-05	-0.035359	0.00883885
rs2663122	chr15	99594881	A	G	0.98744	0.34729	6.32584e-05	0.0369963	0.00924917
rs634801	chr9	35098008	A	C	0.99954	0.46311	6.32969e-05	0.0353254	0.00883175
rs555090	chr6	50587845	C	G	0.99385	0.11691	6.33205e-05	0.0554352	0.0138597
rs73354045	chr17	73879810	A	G	0.98783	0.89757	6.34831e-05	0.0585363	0.0146373
rs10808546	chr8	126495818	C	T	0.99968	0.43587	6.34969e-05	0.0355141	0.00888059
rs170385	chr16	3295394	C	T	0.99812	0.53945	6.3497e-05	-0.0353673	0.00884389
rs2663123	chr15	99593647	A	G	0.99855	0.3485	6.36953e-05	0.0367605	0.00919395
rs10186898	chr2	77527027	G	T	0.98381	0.0139	6.37242e-05	0.149948	0.0375037
rs4741946	chr9	4301392	A	G	0.95223	0.02159	6.37365e-05	-0.125328	0.0313463
rs55921265	chr8	126503915	A	G	0.99825	0.77587	6.38212e-05	0.042422	0.0106112
rs73230462	chr7	92063572	A	C	0.96082	0.88029	6.39093e-05	0.0549745	0.0137521
rs191962488	chr12	69740593	A	G	0.77287	0.01898	6.39559e-05	-0.143229	0.0358308
rs200440281	chr14	79687859	D	I	0.85033	0.99548	6.41854e-05	0.272913	0.0682878
rs73143236	chr20	57367237	C	T	0.99328	0.18459	6.42502e-05	-0.0455799	0.0114056
rs170383	chr16	3294931	A	C	0.99891	0.53925	6.43383e-05	-0.0353196	0.00883885
rs12909568	chr15	71175167	A	G	0.90433	0.98881	6.46025e-05	-0.174596	0.0437039
rs139145752	chr7	141562148	C	T	0.84764	0.00089	6.462e-05	0.707433	0.177083
rs154293	chr5	123139220	A	G	0.99972	0.46651	6.4708e-05	-0.0353502	0.00884949
rs199725356	chr1	176871299	D	I	0.85101	0.18194	6.48147e-05	0.0494894	0.0123903
rs116760545	chr2	71959336	G	T	0.3597	0.00018	6.49392e-05	3.14178	0.786674
rs138419542	chr1	176871304	D	I	0.85101	0.81806	6.49617e-05	-0.0494826	0.0123903
rs7318565	chr13	45894174	A	G	0.60649	0.00286	6.4965e-05	-0.415081	0.103935
rs138344625	chr1	176871307	D	I	0.85102	0.81806	6.51192e-05	-0.0494754	0.0123902
rs80304559	chr16	88775254	A	G	0.98979	0.88609	6.5131e-05	0.0552651	0.0138403
rs525106	chr9	35049468	C	T	0.99533	0.48941	6.51537e-05	-0.0353947	0.00886426
rs75148580	chr2	77528126	C	T	0.98357	0.98609	6.51628e-05	-0.149726	0.0374978
rs172790	chr16	3295066	C	T	0.99628	0.5389	6.52085e-05	-0.0353434	0.00885186
rs201186577	chr1	176871315	D	I	0.85103	0.18194	6.52494e-05	0.0494694	0.0123902
rs144602360	chr2	27155076	D	I	0.95689	0.23013	6.52509e-05	-0.0423031	0.0105953
rs139317629	chr6	53084800	C	T	0.76536	0.00162	6.52988e-05	0.518228	0.129802
rs715131	chr12	31163815	C	T	0.98962	0.26282	6.53788e-05	-0.0400473	0.0100315
rs224208	chr16	3297181	C	T	0.99434	0.53917	6.54403e-05	-0.0353547	0.00885654
rs147223456	chr1	66194234	C	G	0.9021	0.02234	6.60287e-05	0.124785	0.0312759
rs196695	chr6	80154074	A	G	0.96825	0.92406	6.6212e-05	-0.0664974	0.0166696
rs115001783	chr3	111250641	C	T	0.24943	0.0001	6.62299e-05	4.00614	1.00428
rs77495633	chr2	77547167	C	T	0.9713	0.01419	6.62497e-05	0.148856	0.0373164
rs598116	chr6	50532774	A	G	0.97496	0.09633	6.62675e-05	0.060513	0.0151702
rs143941193	chr3	66497369	C	G	0.77954	0.95402	6.63435e-05	0.0952206	0.0238727
rs12994565	chr2	40766798	A	G	0.9389	0.70453	6.6348e-05	0.0399171	0.0100076
rs1231123	chr16	3293922	A	T	0.98867	0.45273	6.64709e-05	0.0354548	0.00888986
rs11415076	chr3	196078355	D	I	0.96013	0.34644	6.64874e-05	0.0375951	0.00942667
rs2356284	chr5	22774394	C	G	0.97136	0.48983	6.67609e-05	-0.0356081	0.00893062
rs138991684	chr2	77533864	D	I	0.9768	0.98614	6.68881e-05	-0.150253	0.0376881
rs13185917	chr5	123137212	C	T	0.99633	0.69153	6.71084e-05	-0.038162	0.00957411
rs10023729	chr4	7458861	A	G	0.52577	0.99681	6.71358e-05	0.425375	0.106721
rs1161397	chr6	50596453	A	G	0.99515	0.88325	6.7149e-05	-0.0552209	0.0138544
rs143335430	chr17	5390882	C	T	0.87647	0.02522	6.71559e-05	-0.116024	0.0291095
rs2274356	chr10	6155876	A	G	0.99309	0.13725	6.71986e-05	0.05133	0.0128787
rs150174604	chr9	122741742	A	G	0.51748	0.00308	6.72387e-05	-0.46082	0.115624
rs34824846	chr1	29564614	C	T	0.73671	0.10482	6.72703e-05	0.0672687	0.0168789
rs78937365	chr14	35395318	G	T	0.90559	0.04906	6.7343e-05	0.085628	0.0214869
rs1563101	chr15	24972731	C	T	0.96796	0.4786	6.74055e-05	0.0356987	0.00895847
rs74069728	chr14	79785616	C	T	0.93343	0.00552	6.74717e-05	-0.236663	0.0593932
rs112742182	chr3	111254184	C	T	0.24888	0.0001	6.75326e-05	3.87189	0.971748
rs1013060	chr21	34528414	A	C	0.98449	0.1733	6.78381e-05	-0.0464571	0.0116627
rs10240708	chr7	144539301	C	T	0.97495	0.34684	6.82473e-05	-0.0373222	0.00937282
rs35389780	chr5	42627586	A	G	0.97074	0.01022	6.82834e-05	-0.179979	0.0451999
rs114938115	chr2	176463125	A	G	0.6872	0.01247	6.84598e-05	-0.191669	0.0481432
rs10238007	chr7	92058493	A	T	0.81886	0.11671	6.84622e-05	-0.0597294	0.0150028
rs180713270	chr3	19612607	C	T	0.66155	0.99379	6.85782e-05	0.27751	0.0697119
rs10909807	chr1	3780556	A	G	0.9415	0.94749	6.86505e-05	-0.0819929	0.0205983
rs75628752	chr5	91712077	A	G	0.57189	0.99957	6.86825e-05	-1.02536	0.257598
rs615838	chr6	50597092	C	G	0.99509	0.88323	6.86989e-05	-0.0551453	0.0138542
rs280340	chr6	50537490	G	T	0.9758	0.09589	6.87751e-05	0.0604887	0.0151977
rs10070986	chr5	123137908	C	T	0.99698	0.30848	6.87871e-05	0.0380906	0.00957029
rs79744421	chr2	77541806	C	T	0.97076	0.9858	6.88151e-05	-0.148501	0.037312
rs280319	chr6	50630790	A	G	0.99741	0.11651	6.89323e-05	0.0551162	0.0138497
rs73853711	chr4	148970201	C	T	0.76323	0.00237	6.90669e-05	-0.413035	0.103801
rs77279832	chr5	98922893	A	G	0.42084	0.99973	6.91119e-05	-1.48331	0.372789
rs185550479	chr2	115611313	A	T	0.54907	0.99487	6.91142e-05	0.338068	0.0849639
rs202158562	chr19	39093627	D	I	0.94499	0.12178	6.91403e-05	0.0545599	0.0137124
rs56078238	chr7	92059842	C	T	0.88043	0.11729	6.91973e-05	-0.0575432	0.0144629
rs145647712	chr11	79902012	A	C	0.88466	0.95822	6.93276e-05	0.0951724	0.0239233
rs113851355	chr3	111251924	A	G	0.24931	0.9999	6.93395e-05	-3.94929	0.992738
rs12404463	chr1	226096417	A	G	0.82273	0.963	6.9357e-05	-0.102961	0.0258818
rs10070818	chr5	171636197	A	G	0.96678	0.7033	6.93577e-05	0.0388659	0.0097699
rs78340240	chr4	170015928	G	T	0.968	0.97283	6.93994e-05	0.109197	0.0274505
rs111654013	chr3	145452730	A	G	0.60657	0.00961	6.94529e-05	-0.240691	0.0605086
rs10972283	chr9	35011279	G	T	0.99544	0.49036	6.94692e-05	-0.0352596	0.00886423
rs911679	chr14	95977431	C	G	0.88394	0.79417	6.96083e-05	0.0457909	0.0115132
rs62226100	chr21	34527988	C	T	0.98519	0.82669	6.97008e-05	0.046364	0.0116582
rs280320	chr6	50631133	C	G	0.99641	0.11654	6.97142e-05	0.0551016	0.0138554
rs10972284	chr9	35011488	A	G	0.99558	0.49031	6.97472e-05	-0.0352499	0.0088639
rs144252302	chr16	81903487	C	T	0.55382	0.00203	6.98078e-05	0.53725	0.135103
rs73002473	chr19	12336358	A	G	0.96025	0.09786	6.98476e-05	-0.0592368	0.0148969
rs79851920	chr17	58308986	C	T	0.58326	0.00021	6.99253e-05	1.42091	0.357354
rs7150884	chr14	79684324	A	G	0.79168	0.99448	6.99467e-05	0.260856	0.0656058
rs7924897	chr11	90614977	A	G	0.99219	0.44425	7.02658e-05	0.0354745	0.00892433
rs4393627	chr17	73887996	A	G	0.99413	0.10581	7.02662e-05	-0.057366	0.0144316
rs138705771	chr7	71194789	A	G	0.71637	0.95417	7.03157e-05	0.0967993	0.0243529
rs635841	chr6	50601493	A	T	0.99601	0.88325	7.03211e-05	-0.0550456	0.0138485
rs76700193	chr7	103741317	A	G	0.9601	0.99225	7.0325e-05	-0.205222	0.0516304
rs1822371	chr14	96864056	A	C	0.8524	0.29611	7.0372e-05	-0.0415111	0.0104439
rs75023213	chr5	123164599	A	C	0.98406	0.91546	7.05195e-05	-0.0633693	0.0159453
rs74611106	chr4	62111185	C	T	0.92303	0.00152	7.05222e-05	-0.500031	0.125821
rs4573474	chr1	3779637	C	G	0.94322	0.0524	7.06019e-05	0.0818709	0.0206022
rs77725391	chr4	23704904	A	C	0.96893	0.99616	7.0892e-05	-0.292614	0.0736523
rs34451657	chr15	24971761	C	G	0.97211	0.36363	7.09518e-05	0.0368578	0.00927773
rs6464623	chr7	144542193	A	C	0.97497	0.65425	7.09636e-05	0.0372598	0.00937903
rs280318	chr6	50629773	A	G	0.99868	0.11652	7.10486e-05	0.0549855	0.0138419
rs28943888	chr5	42631177	G	T	0.97996	0.98976	7.10609e-05	0.178453	0.0449237
rs280311	chr6	50605265	A	G	0.9966	0.88342	7.11425e-05	-0.0550294	0.0138541
rs59856368	chr6	50540337	D	I	0.97815	0.90368	7.12786e-05	-0.0601646	0.0151486
rs280310	chr6	50605282	C	G	0.99662	0.11658	7.13679e-05	0.0550188	0.013854
rs12149541	chr16	52238139	A	G	0.99837	0.17216	7.13989e-05	-0.0465705	0.011727
rs280314	chr6	50604101	A	T	0.99626	0.11675	7.14705e-05	0.0549867	0.0138471
rs10830595	chr11	90616308	C	G	0.99782	0.55314	7.14873e-05	-0.0353263	0.00889623
rs56192905	chr7	92060139	C	T	0.88569	0.11666	7.14984e-05	-0.0573991	0.014455
rs12377823	chr9	34832919	C	T	0.99827	0.37677	7.16037e-05	0.0359369	0.00905091
rs2255999	chr5	5897879	A	G	0.99906	0.19619	7.16965e-05	0.0445524	0.0112216
rs11075287	chr16	16039950	G	T	0.99178	0.30178	7.17321e-05	0.0382344	0.00963056
rs113996130	chr22	36738078	C	G	0.438	0.99989	7.18037e-05	-2.25593	0.568263
rs151280633	chr14	79687585	C	G	0.84205	0.00461	7.18331e-05	-0.269801	0.0679638
rs183611440	chr16	62287646	C	T	0.83751	0.00767	7.18373e-05	0.229844	0.0578988
rs143305189	chr14	79687509	A	G	0.84152	0.00461	7.19982e-05	-0.269761	0.0679633
rs7382570	chr6	58548059	C	G	0.95112	0.32074	7.20915e-05	-0.0382931	0.00964825
rs184583763	chr3	19722597	A	G	0.64954	0.00616	7.21086e-05	-0.281002	0.0708016
rs13315414	chr3	139178387	C	T	0.68034	0.03833	7.21465e-05	0.110735	0.0279018
rs72684659	chr14	46627723	C	G	0.85467	0.84697	7.2296e-05	0.052248	0.0131665
rs145957446	chr14	79687782	C	T	0.84314	0.0046	7.23079e-05	-0.269734	0.0679739
rs78532451	chr17	73879092	C	T	0.98743	0.10236	7.23174e-05	-0.0580761	0.0146355
rs280309	chr6	50606936	C	T	0.99671	0.88342	7.2399e-05	-0.0549701	0.0138537
rs137934048	chr14	79688416	A	G	0.84456	0.9954	7.24153e-05	0.269721	0.0679766
rs192497345	chr6	88062001	A	G	0.74678	0.9971	7.24291e-05	0.36852	0.0928777
rs76707901	chr18	13971123	A	G	0.88347	0.92544	7.24448e-05	0.0708151	0.0178477
rs2062707	chr5	5897614	C	T	0.99917	0.19622	7.24894e-05	0.0445208	0.0112211
rs7708796	chr5	5898723	A	G	0.99845	0.19615	7.27134e-05	0.0445254	0.0112243
rs55887944	chr22	45108589	A	G	0.87019	0.95336	7.2792e-05	-0.0882361	0.0222447
rs56741487	chr17	73879072	A	C	0.98721	0.10235	7.2891e-05	-0.0580546	0.014637
rs10059555	chr5	123139051	A	G	0.99846	0.30846	7.2948e-05	0.0379293	0.00956337
rs1161449	chr6	50547278	G	T	0.98049	0.90373	7.29717e-05	-0.0600316	0.0151365
rs189198029	chr1	167401111	A	T	0.73685	0.02314	7.2996e-05	0.133562	0.0336772
rs146904357	chr11	90598220	D	I	0.98932	0.558	7.30672e-05	-0.0354644	0.00894276
rs71890466	chr14	40845536	D	I	0.94022	0.78583	7.30711e-05	-0.0435342	0.0109777
rs77982877	chr14	79686577	G	T	0.83373	0.00465	7.31192e-05	-0.26936	0.0679253
rs584568	chr6	50547346	A	G	0.98067	0.90374	7.31709e-05	-0.0600173	0.0151353
rs11794069	chr9	131561617	C	G	0.63814	0.98509	7.34388e-05	0.177098	0.0446711
rs146844294	chr3	16248127	C	T	0.98729	0.0222	7.35093e-05	0.118357	0.0298559
rs12564767	chr1	20605374	A	G	0.983	0.64783	7.35156e-05	0.0370234	0.00933932
rs2072856	chr22	40816749	A	G	0.99828	0.55973	7.35229e-05	0.035177	0.0088736
rs280292	chr6	50551445	C	T	0.98213	0.90375	7.35616e-05	-0.0599603	0.0151258
rs79167177	chr14	79686601	C	T	0.83446	0.99535	7.36514e-05	0.26925	0.067927
rs113923669	chr2	77546467	A	C	0.95613	0.98543	7.3681e-05	-0.147283	0.0371579
rs2255326	chr10	81707174	A	G	0.99747	0.72638	7.37752e-05	0.0389109	0.00981752
rs144813459	chr4	189778818	A	G	0.37665	0.99885	7.39122e-05	-0.802163	0.202415
rs7459532	chr8	10261068	C	T	0.9939	0.55959	7.39477e-05	0.0352065	0.00888412
rs1371614	chr2	27152874	C	T	0.96284	0.25371	7.40433e-05	-0.0405347	0.0102295
rs78316105	chr14	79686859	C	T	0.83718	0.00465	7.40943e-05	-0.268778	0.0678325
rs180839526	chr7	14892971	C	T	0.52158	0.00169	7.41032e-05	0.521227	0.131545
rs147127390	chr6	53186746	C	G	0.85169	0.00142	7.41415e-05	0.521549	0.13163
rs17386465	chr7	103845250	A	G	0.98873	0.99266	7.41879e-05	-0.208127	0.0525297
rs196701	chr6	80147187	C	T	0.99921	0.92888	7.43311e-05	-0.0669432	0.0168979
rs10758291	chr9	35097585	C	T	0.98828	0.23979	7.44061e-05	0.040868	0.0103166
rs9882500	chr3	1708321	C	G	0.88178	0.74216	7.44118e-05	0.0423277	0.0106851
rs6555376	chr5	5899305	A	G	0.99786	0.80393	7.4436e-05	-0.0444732	0.011227
rs11949265	chr5	171689472	A	T	0.9766	0.2755	7.45049e-05	-0.0393389	0.0099314
rs4981263	chr14	35494519	C	T	0.95928	0.94835	7.45859e-05	-0.0809832	0.0204462
rs4643303	chr16	88771629	C	G	0.98763	0.11221	7.46293e-05	-0.0552413	0.0139475
rs145217842	chr14	79687338	C	T	0.8385	0.00464	7.4658e-05	-0.268668	0.0678358
rs280325	chr6	50635506	A	G	0.98776	0.11583	7.4796e-05	0.0552303	0.0139466
rs2255778	chr5	5899847	C	T	0.99768	0.19608	7.48133e-05	0.0444624	0.0112277
rs188488175	chr1	92624744	C	T	0.85069	0.99402	7.48762e-05	0.244624	0.0617757
rs11740186	chr5	22722716	A	C	0.98204	0.50485	7.49055e-05	-0.0352393	0.00889931
rs41270241	chr2	201477581	C	T	0.73755	0.00781	7.50822e-05	-0.223801	0.0565266
rs140666783	chr7	100543885	D	I	0.80661	0.98754	7.53565e-05	-0.180129	0.0455063
rs3990198	chr5	123163134	C	T	0.98503	0.91555	7.53668e-05	-0.0631323	0.0159493
rs10058179	chr5	123163311	A	G	0.98495	0.08446	7.54326e-05	0.0631296	0.0159494
rs61777154	chr1	23723149	A	G	0.89318	0.85038	7.54575e-05	0.051216	0.0129398
rs192827491	chr14	63258334	A	G	0.52803	0.99601	7.54587e-05	-0.39307	0.0993096
rs67666913	chr10	123489526	A	C	0.99347	0.79007	7.54896e-05	-0.0429879	0.0108612
rs72792195	chr16	52232773	C	T	0.99784	0.82794	7.55014e-05	0.0464335	0.0117319
rs280284	chr6	50568262	A	G	0.9967	0.09696	7.55391e-05	0.0593329	0.0149915
rs280299	chr6	50623845	C	T	0.99962	0.88344	7.55574e-05	-0.0547527	0.0138344
rs10477024	chr5	152013077	A	C	0.95443	0.24893	7.57146e-05	-0.0408213	0.0103157
rs280286	chr6	50567085	C	T	0.99883	0.9027	7.5716e-05	-0.0591802	0.014955
rs147484464	chr4	187348020	A	G	0.96083	0.99227	7.57448e-05	-0.195121	0.0493088
rs2255758	chr5	5900270	A	G	0.99749	0.80398	7.58308e-05	-0.0444294	0.0112285
rs11034412	chr11	37780476	C	T	0.60568	0.00257	7.58669e-05	0.455761	0.115186
rs72792194	chr16	52232367	C	T	0.99784	0.17204	7.59151e-05	-0.0464191	0.0117321
rs5810611	chr14	93219220	D	I	0.95035	0.27355	7.59473e-05	-0.0401494	0.0101478
rs280300	chr6	50623103	A	G	0.99947	0.88344	7.60194e-05	-0.0547369	0.0138355
rs77331833	chr2	127538660	A	G	0.82012	0.99214	7.6089e-05	-0.222544	0.0562543
rs56091461	chr17	30584886	C	G	0.9967	0.1224	7.61232e-05	-0.0532058	0.0134497
rs280302	chr6	50622506	C	T	0.99935	0.88345	7.61641e-05	-0.0547337	0.0138363
rs8052643	chr16	67019934	A	G	0.95233	0.93641	7.61845e-05	-0.0730535	0.0184677
rs76034599	chr7	103864879	C	T	0.94495	0.99245	7.6226e-05	-0.209105	0.0528629
rs10153926	chr2	43189120	A	G	0.85662	0.77761	7.63069e-05	-0.0450039	0.011378
rs62371170	chr5	123190309	A	C	0.98545	0.91455	7.63948e-05	-0.0627601	0.0158682
rs280316	chr6	50625378	C	T	1.00001	0.88341	7.64782e-05	-0.0546993	0.0138311
rs189291673	chr6	88478580	A	G	0.70362	0.00443	7.65937e-05	-0.311578	0.0787918
rs192816899	chr15	65127000	C	T	0.88867	0.97847	7.66219e-05	-0.126956	0.0321053
rs878050	chr20	57365717	A	G	0.99152	0.81591	7.66353e-05	0.045169	0.0114227
rs59730847	chr8	36324956	C	T	0.86292	0.00379	7.67921e-05	-0.30979	0.0783518
rs11705740	chr3	28197450	C	T	0.99601	0.31728	7.68242e-05	0.037529	0.00949204
rs145108185	chr5	19590620	C	T	0.53729	0.18229	7.68605e-05	-0.0614696	0.0155477
rs78217493	chr16	88791703	A	G	0.92252	0.90048	7.69088e-05	0.0601767	0.0152212
rs878049	chr20	57365655	A	C	0.99133	0.81594	7.69254e-05	0.0451638	0.011424
rs80270610	chr2	67142858	A	C	0.99835	0.94646	7.69384e-05	-0.0771847	0.0195237
rs75422413	chr2	67143489	C	G	0.9984	0.05354	7.69722e-05	0.0771801	0.0195231
rs77705126	chr2	67142450	A	G	0.99835	0.94646	7.69752e-05	-0.0771836	0.019524
rs117136970	chr7	87766532	A	G	0.96684	0.97221	7.70279e-05	-0.106971	0.0270601
rs144937101	chr4	24729828	G	T	0.74909	0.99881	7.70826e-05	-0.628717	0.159051
rs187635580	chr3	19441510	A	G	0.57525	0.99219	7.71218e-05	0.270528	0.0684394
rs117827751	chr18	74639732	C	T	0.64136	0.00484	7.72183e-05	0.316166	0.0799911
rs7118654	chr11	90638748	C	T	0.99943	0.35426	7.72412e-05	0.0365538	0.00924843
rs280285	chr6	50568092	G	T	0.99713	0.09711	7.73307e-05	0.0591957	0.0149781
rs62498569	chr7	144533322	C	T	0.97439	0.34546	7.73846e-05	-0.0370759	0.00938156
rs4783755	chr16	61398042	G	T	0.56596	0.99478	7.74023e-05	0.299843	0.0758724
rs140993397	chr5	65627449	A	G	0.74648	0.98681	7.75666e-05	0.175356	0.0443778
rs77450252	chr17	5019800	C	G	0.81385	0.02817	7.77099e-05	-0.112775	0.0285435
rs71510740	chr1	92357342	A	G	0.67006	0.99823	7.77192e-05	0.550248	0.139269
rs7115535	chr11	90638823	A	C	0.99944	0.64574	7.77937e-05	-0.0365376	0.0092483
rs9817904	chr3	151178708	A	G	0.98441	0.23317	7.78403e-05	0.0415241	0.0105109
rs612481	chr6	50616698	A	G	0.99811	0.88345	7.78962e-05	-0.0546963	0.0138457
rs673216	chr6	50568418	A	G	0.99726	0.09708	7.79301e-05	0.0591723	0.0149791
rs181805191	chr1	43887291	C	T	0.85532	0.0039	7.79332e-05	-0.319656	0.0809193
rs201492312	chr7	87682787	D	I	0.89305	0.02821	7.81088e-05	0.111068	0.02812
rs479538	chr6	50616980	A	T	0.99818	0.88345	7.81334e-05	-0.0546846	0.0138453
rs9812989	chr3	151172114	C	T	0.99653	0.77023	7.81445e-05	-0.0413933	0.0104802
rs186889783	chr4	176839924	C	T	0.3159	0.00017	7.81689e-05	1.93651	0.490308
rs148718792	chr4	24733856	A	G	0.74262	0.9988	7.81872e-05	-0.628853	0.159222
rs76711266	chr3	66432501	A	G	0.70473	0.97336	7.82441e-05	0.129002	0.0326641
rs482874	chr6	50569338	G	T	0.99707	0.09707	7.84414e-05	0.0591559	0.0149809
rs62538584	chr9	10207986	G	T	0.95705	0.86541	7.8494e-05	0.0524514	0.0132836
rs6744358	chr2	229205582	C	G	0.97602	0.09369	7.85813e-05	-0.0602244	0.0152532
rs12895154	chr14	95992660	C	T	0.92799	0.57708	7.86405e-05	-0.0365578	0.00925948
rs35885215	chr5	123139454	D	I	0.98752	0.69514	7.86642e-05	-0.0380725	0.00964332
rs147951993	chr4	24734941	C	T	0.74148	0.0012	7.86962e-05	0.628742	0.159257
rs138063340	chr7	11178470	A	G	0.59395	0.99012	7.89573e-05	-0.223897	0.0567233
rs139752327	chr7	87762635	A	G	0.97019	0.97216	7.89691e-05	-0.106497	0.0269807
rs113574622	chr5	176542594	C	G	0.71815	0.99752	7.89833e-05	-0.413073	0.104652
rs8062278	chr16	16039429	C	G	0.98744	0.69883	7.90237e-05	-0.0381012	0.00965327
rs138708747	chr4	24730428	C	T	0.74736	0.00119	7.91509e-05	0.627817	0.159078
rs74645187	chr4	23759029	A	G	0.98976	0.99612	7.91627e-05	-0.286761	0.072661
rs166803	chr6	50637974	A	G	0.98652	0.11676	7.94762e-05	0.0548949	0.0139129
rs140274729	chr10	80250635	A	G	0.39784	0.99973	7.97569e-05	1.68657	0.427547
rs1039402	chr17	30586099	C	T	0.99967	0.12453	7.97868e-05	-0.0525987	0.0133341
rs144569544	chr2	229204243	D	I	0.97679	0.90632	7.98813e-05	0.0601412	0.0152473
rs280301	chr6	50622850	C	T	0.99758	0.88376	7.99471e-05	-0.0546781	0.0138629
rs11854119	chr15	61982549	A	G	0.83239	0.00682	8.00972e-05	0.237766	0.0602895
rs11786677	chr8	10264260	A	G	0.99705	0.417	8.01027e-05	-0.0351931	0.00892382
rs7831285	chr8	9892568	A	G	0.94782	0.36249	8.01178e-05	0.0369736	0.0093754
rs58723611	chr6	40296389	D	I	0.84015	0.00205	8.04827e-05	0.413658	0.10492
rs17130045	chr10	114515330	C	T	0.93875	0.07567	8.05562e-05	0.0676963	0.0171715
rs1837929	chr5	22772837	A	G	0.98481	0.49519	8.06905e-05	-0.0349607	0.00886882
rs74491584	chr3	77571343	A	G	0.71047	0.98919	8.07349e-05	-0.200704	0.0509164
rs6847460	chr4	77851537	A	C	0.94331	0.42383	8.07761e-05	-0.0361405	0.00916871
rs77751751	chr3	61797561	A	G	0.92597	0.08913	8.09129e-05	-0.0636294	0.0161442
rs512388	chr6	50568416	C	T	0.99431	0.90352	8.09468e-05	-0.0592762	0.0150401
rs10509614	chr10	92679687	A	C	0.91081	0.96416	8.10999e-05	-0.0982765	0.0249385
rs11800725	chr1	3777611	A	G	0.94263	0.94883	8.11267e-05	-0.0817826	0.0207534
rs115914664	chr18	36843495	A	T	0.51497	0.00023	8.11376e-05	2.44113	0.619474
rs78717332	chr12	26678906	C	T	0.94174	0.97267	8.12487e-05	0.111774	0.0283668
rs6070604	chr20	57364228	A	G	0.98954	0.81606	8.13502e-05	0.045054	0.011435
rs115961419	chr3	174171040	C	G	0.72768	0.95858	8.14699e-05	0.100865	0.0256025
rs1524958	chr11	90643297	A	C	0.9965	0.45161	8.15867e-05	0.0350074	0.00888664
rs77578486	chr11	79831738	A	G	0.8821	0.04036	8.16649e-05	-0.0961274	0.0244034
rs79037466	chr2	67129260	C	T	0.97788	0.05788	8.18463e-05	0.0741444	0.0188252
rs185689109	chr4	62126859	A	C	0.91678	0.00153	8.19183e-05	-0.496181	0.125987
rs280341	chr6	50534485	C	T	0.97247	0.09521	8.20724e-05	0.0601451	0.0152734
rs145581182	chr7	135337640	A	G	0.63315	0.9998	8.21739e-05	-1.26641	0.321621
rs75034164	chr4	53045986	A	G	0.86121	0.98777	8.22194e-05	0.169074	0.0429398
rs181426885	chr13	115042144	G	T	0.81583	0.00021	8.22208e-05	1.29924	0.329969
rs140952053	chr13	115040606	C	T	0.81617	0.99979	8.22479e-05	-1.29165	0.328046
rs4148330	chr16	16041768	A	G	0.99841	0.31574	8.22674e-05	0.0372956	0.0094723
rs147603490	chr13	115039423	C	G	0.81398	0.99979	8.23594e-05	-1.29037	0.327751
rs34493209	chr19	12345951	C	G	0.9645	0.90106	8.25916e-05	0.0582699	0.0148029
rs7236531	chr18	13865075	A	G	0.99953	0.46768	8.27065e-05	-0.0347869	0.00883802
rs17481232	chr5	123151676	A	C	0.99422	0.8167	8.28397e-05	0.0451486	0.0114717
rs75152685	chr20	5579956	A	G	0.6133	0.97945	8.28406e-05	-0.154488	0.0392533
rs117990402	chr13	107912410	A	C	0.59616	0.99679	8.2967e-05	-0.381653	0.0969821
rs184900631	chr13	115044658	A	T	0.80528	0.0002	8.29962e-05	1.32451	0.336578
rs184091759	chr13	115037265	A	G	0.8107	0.00021	8.30549e-05	1.28757	0.327206
rs4590691	chr1	7094425	A	G	0.99514	0.41374	8.30909e-05	0.0353482	0.00898317
rs138923168	chr14	79687981	G	T	0.84272	0.00459	8.31482e-05	-0.267983	0.0681064
rs9957823	chr18	13843198	C	T	0.97655	0.69207	8.31915e-05	0.037799	0.00960671
rs2256244	chr5	5896509	C	T	0.99881	0.19637	8.33117e-05	0.0441412	0.0112196
rs73474865	chr13	45890943	C	T	0.61425	0.00283	8.33934e-05	-0.408463	0.103827
rs9289838	chr3	151170161	C	T	0.99696	0.22836	8.34403e-05	0.0413443	0.0105097
rs4701295	chr5	22716674	A	G	0.9847	0.49663	8.35615e-05	0.0349705	0.00889026
rs9327307	chr5	123148865	A	C	0.99494	0.31013	8.36047e-05	0.037586	0.00955545
rs1969772	chr1	59205102	A	G	0.99878	0.70947	8.39758e-05	-0.0381319	0.00969688
rs60586594	chr5	123180556	C	G	0.99655	0.91507	8.39859e-05	-0.0621784	0.015812
rs199868910	chr3	66142131	D	I	0.80389	0.60021	8.40434e-05	0.0393188	0.00999918
rs1362382	chr16	52224990	G	T	0.99981	0.20304	8.42305e-05	-0.0432783	0.0110076
rs7850519	chr9	34842864	A	G	0.99494	0.6233	8.42724e-05	-0.0356243	0.00906114
rs138916590	chr13	35868795	C	T	0.50117	0.99994	8.44782e-05	-4.04344	1.02861
rs11019214	chr11	90607032	A	G	0.99841	0.55396	8.44807e-05	-0.0349593	0.00889335
rs1161390	chr6	50598780	C	T	0.88528	0.07276	8.45683e-05	0.0712748	0.0181328
rs6575584	chr14	96868036	A	G	0.84891	0.70321	8.46569e-05	0.0411121	0.0104599
rs143102450	chr6	25978703	A	G	0.99262	0.00985	8.46615e-05	0.1728	0.0439645
rs182959227	chr4	66032945	G	T	0.59336	0.99673	8.4854e-05	0.38414	0.0977482
rs73393066	chr12	114287460	A	G	0.62085	0.00037	8.50764e-05	-1.20707	0.3072
rs6734835	chr2	229215647	A	T	0.95847	0.09553	8.5152e-05	-0.0599104	0.0152481
rs10830599	chr11	90637219	C	G	0.99932	0.6456	8.54353e-05	-0.0363307	0.00924857
rs72689463	chr14	90172090	C	T	0.82233	0.31099	8.55771e-05	0.0409537	0.0104265
rs200170363	chr19	39093597	D	I	0.94498	0.12214	8.56888e-05	0.0537614	0.0136883
rs777707	chr8	8584344	A	G	0.99826	0.4647	8.59676e-05	-0.0343719	0.00875326
rs587118	chr9	35074917	C	T	0.9952	0.50929	8.59938e-05	0.0347907	0.00886009
rs111798915	chr7	144532829	D	I	0.97713	0.34726	8.61749e-05	-0.0367469	0.00935948
rs115782367	chr4	52981273	C	T	0.88585	0.98766	8.62999e-05	0.16555	0.0421695
rs184211986	chr13	98000556	G	T	0.88503	0.99749	8.63003e-05	-0.355641	0.0905902
rs13021852	chr2	63562115	A	G	0.98827	0.19866	8.63501e-05	-0.0436168	0.0111106
rs142889618	chr1	54218337	C	T	0.66806	0.99555	8.63663e-05	0.310728	0.0791534
rs182293493	chr6	103606921	A	G	0.47053	0.99805	8.64667e-05	-0.583123	0.148553
rs4234322	chr3	151177812	A	T	0.9877	0.2322	8.65543e-05	0.0412572	0.0105111
rs280281	chr6	50569750	A	G	0.99646	0.09708	8.65866e-05	0.0588063	0.0149824
rs2307407	chr7	103838221	C	T	0.9931	0.99268	8.66511e-05	-0.206138	0.0525214
rs113098727	chr5	123177358	C	T	0.98333	0.08314	8.66976e-05	0.0630745	0.0160711
rs2131447	chr3	28194182	A	T	0.99847	0.31649	8.67752e-05	0.0372562	0.00949323
rs61777153	chr1	23720822	A	G	0.89077	0.85153	8.68329e-05	0.0510159	0.0129999
rs981972	chr7	103688095	C	G	0.99086	0.98137	8.689e-05	-0.132796	0.0338404
rs877578	chr16	88770577	A	C	0.97042	0.88878	8.6963e-05	0.0554351	0.0141272
rs143934541	chr2	176457331	C	T	0.63474	0.9895	8.70186e-05	0.213778	0.054482
rs13163278	chr5	150046192	A	T	0.78125	0.31693	8.70423e-05	-0.041881	0.0106737
rs4782957	chr16	84437421	C	T	0.9674	0.46056	8.70954e-05	0.0350406	0.00893068
rs75093808	chr14	79683904	A	G	0.79476	0.99447	8.71709e-05	0.256756	0.0654422
rs75618698	chr14	79683729	A	G	0.79481	0.00553	8.73834e-05	-0.256709	0.06544
rs10909805	chr1	3771723	A	T	0.9364	0.94868	8.74271e-05	-0.0816051	0.0208033
rs114067856	chr2	175677907	A	G	0.66205	0.02409	8.74753e-05	-0.139788	0.0356368
rs7160468	chr14	79682611	A	T	0.79776	0.00553	8.75747e-05	-0.255797	0.0652163
rs61737996	chr16	88781534	C	T	0.96974	0.11139	8.75826e-05	-0.0554159	0.0141285
rs2256267	chr5	5896019	C	T	0.99889	0.80357	8.75871e-05	-0.0439962	0.0112171
rs80237494	chr3	16189319	C	G	0.97288	0.0222	8.76085e-05	0.119009	0.0303424
rs80111061	chr5	123177545	C	G	0.99895	0.08474	8.76279e-05	0.0620013	0.015808
rs138054211	chr14	79683433	G	T	0.79497	0.99447	8.76917e-05	0.256627	0.0654331
rs62201236	chr2	229200890	C	T	0.98116	0.90639	8.77249e-05	0.0596884	0.0152193
rs77740706	chr5	123177601	A	G	0.9989	0.08474	8.77498e-05	0.0619963	0.0158081
rs11019219	chr11	90644851	C	G	0.99213	0.54509	8.7864e-05	-0.0348933	0.00889794
rs1036917	chr3	64527465	A	C	0.53672	0.42569	8.79848e-05	-0.0476342	0.0121479
rs77597067	chr14	79681637	C	T	0.79885	0.99447	8.8017e-05	0.255503	0.0651613
rs11355400	chr22	39971637	D	I	0.94485	0.47599	8.815e-05	-0.0355989	0.00907968
rs74067957	chr14	79743603	A	G	0.96271	0.0052	8.82378e-05	-0.236879	0.0604211
rs74067958	chr14	79743906	C	T	0.96285	0.9948	8.83231e-05	0.236852	0.0604176
rs1898647	chrX	12625260	C	T	0.62783	0.00162	8.84748e-05	0.443886	0.113241
rs2236307	chr14	23312923	C	T	0.77981	0.78963	8.85393e-05	-0.0476211	0.0121493
rs188319530	chr16	83702685	A	G	0.60906	0.99779	8.86914e-05	0.469805	0.119871
rs143519496	chr6	50542115	D	I	0.97469	0.90486	8.87621e-05	-0.0598203	0.015264
rs280279	chr6	50569862	A	G	0.99625	0.90292	8.87936e-05	-0.0587174	0.0149829
rs113838593	chr15	96195614	A	G	0.96229	0.01132	8.88601e-05	-0.164295	0.041925
rs7140006	chr13	93644002	A	G	0.98975	0.25661	8.89764e-05	0.0399329	0.010191
rs12875027	chr13	23571993	C	T	0.98691	0.78108	8.90527e-05	0.041706	0.010644
rs62201240	chr2	229215531	G	T	0.96118	0.90398	8.90704e-05	0.0595268	0.0151923
rs12954832	chr18	13890906	C	T	0.99688	0.78356	8.92491e-05	-0.0422969	0.0107963
rs7610769	chr3	151170385	C	T	0.99609	0.77121	8.92622e-05	-0.041163	0.010507
rs191830354	chr8	38406824	C	G	0.56416	0.99533	8.9284e-05	-0.342444	0.0874108
rs11623949	chr14	96043922	C	T	0.99408	0.64846	8.93114e-05	-0.0361186	0.00921966
rs196696	chr6	80152161	C	T	0.99232	0.9295	8.93424e-05	-0.0666496	0.0170134
rs115719312	chr1	175302759	C	T	0.63996	0.97856	8.95161e-05	-0.150119	0.0383249
rs56660784	chr7	144538267	A	G	0.97351	0.65257	8.95539e-05	0.0367303	0.00937738
rs601127	chr6	50598130	C	T	0.83825	0.92409	8.96259e-05	-0.0720089	0.018385
rs58246392	chr3	2168372	A	G	0.75687	0.99677	8.96869e-05	0.359789	0.0918637
rs12656941	chr5	171653068	A	C	0.9982	0.2641	8.97624e-05	-0.039	0.00995827
rs141397239	chr10	112476019	C	T	0.60357	0.00171	8.98071e-05	0.545384	0.139263
rs34748093	chr18	13845410	D	I	0.99469	0.31258	8.98878e-05	-0.0370702	0.00946633
rs34503826	chr22	40833762	A	G	0.99651	0.55183	8.98972e-05	0.034731	0.00886903
rs191571094	chr13	115031743	C	T	0.64205	0.00026	8.99687e-05	1.27278	0.325039
rs2236306	chr14	23312875	C	G	0.77889	0.78921	9.00075e-05	-0.0475758	0.0121501
rs7582714	chr2	229188051	A	T	0.98752	0.09448	9.00144e-05	-0.0591596	0.0151084
rs911693	chr9	10213093	C	G	0.99607	0.86397	9.01059e-05	0.0507091	0.0129511
rs75106565	chr11	12072402	C	G	0.87032	0.03216	9.01595e-05	0.102335	0.0261373
rs1492276	chr5	5903697	C	T	0.9965	0.88893	9.01983e-05	-0.0552269	0.0141059
rs111474091	chr5	176542944	C	T	0.71433	0.00251	9.02204e-05	0.40872	0.104395
rs114233662	chr6	25984723	C	T	0.9934	0.99015	9.02704e-05	-0.172005	0.0439351
rs115120861	chr3	16244800	C	T	0.98686	0.97781	9.03724e-05	-0.116802	0.0298367
rs72874363	chr18	13909483	C	T	0.99585	0.21747	9.04039e-05	0.0422155	0.010784
rs574716	chr6	5491723	C	T	0.99793	0.63925	9.05451e-05	0.0359836	0.00919297
rs62201242	chr2	229219092	C	T	0.95719	0.09247	9.05881e-05	-0.0606357	0.0154915
rs112288692	chr10	73339083	C	T	0.67154	0.95501	9.06554e-05	-0.10109	0.0258281
rs41537348	chr5	171652863	A	G	0.99839	0.26423	9.08098e-05	-0.0389652	0.00995649
rs9293035	chr5	22714233	C	T	0.98677	0.50257	9.09952e-05	-0.0347619	0.00888357
rs17109025	chr14	79744273	A	G	0.9654	0.99477	9.10406e-05	0.235555	0.0601992
rs35592496	chr22	40836024	C	T	0.99811	0.44876	9.10629e-05	-0.0346753	0.00886186
rs224213	chr16	3299749	A	G	0.97662	0.44861	9.12707e-05	0.0349754	0.0089398
rs718658	chr15	24976270	A	G	0.97522	0.65538	9.13867e-05	-0.0366715	0.00937406
rs11789226	chr9	34975508	C	T	0.99261	0.49398	9.14053e-05	0.0347385	0.00888006
rs7151358	chr14	79684830	A	G	0.79179	0.0049	9.14266e-05	-0.268728	0.0686948
rs4701300	chr5	22756968	C	T	0.9985	0.50503	9.18865e-05	-0.0344402	0.00880665
rs7145660	chr14	96869440	A	G	0.84556	0.70025	9.20202e-05	0.040874	0.0104528
rs16983494	chr22	27435613	C	T	0.99916	0.87273	9.2058e-05	-0.0517759	0.0132411
rs11075286	chr16	16027724	A	C	0.88421	0.71821	9.20899e-05	-0.0407528	0.0104223
rs277598	chr9	34776789	C	T	0.9848	0.35597	9.22187e-05	0.0360712	0.00922577
rs10712874	chr14	79694633	D	I	0.98445	0.99595	9.24708e-05	0.261756	0.0669594
rs78613579	chr11	12072343	C	G	0.87127	0.9677	9.26535e-05	-0.101915	0.026074
rs139171356	chr3	153607127	C	T	0.75759	0.00986	9.27025e-05	0.206313	0.052785
rs34898276	chr18	13918443	C	T	0.98876	0.20331	9.28597e-05	0.0433583	0.0110943
rs1524954	chr11	90646073	A	T	0.99763	0.64573	9.29136e-05	-0.0361735	0.00925623
rs150946010	chr5	126811334	C	T	0.28139	0.99996	9.31646e-05	-82.5175	21.1185
rs2567681	chr11	133049146	A	C	0.96732	0.66103	9.3269e-05	-0.0367181	0.00939782
rs2820345	chr6	91954375	A	C	0.85621	0.99001	9.33038e-05	-0.183704	0.0470191
rs10477650	chr5	123170490	C	T	0.99994	0.08469	9.33318e-05	0.0617513	0.0158056
rs141209904	chr2	119950864	C	T	0.65378	0.02184	9.3344e-05	-0.146946	0.0376118
rs1110079	chr8	103070048	A	C	0.99913	0.71183	9.33689e-05	0.0378695	0.00969315
rs9506993	chr13	23572055	C	T	0.98666	0.78105	9.34038e-05	0.0415816	0.0106435
rs3822295	chr4	114669516	A	C	0.97994	0.13534	9.34307e-05	0.0515676	0.0131999
rs1524953	chr11	90645680	A	G	0.99791	0.64573	9.34386e-05	-0.0361556	0.00925487
rs116910691	chr17	5182222	C	G	0.81897	0.03527	9.35681e-05	-0.100706	0.0257804
rs1917502	chr11	90644661	A	G	0.9994	0.64568	9.37334e-05	-0.0361217	0.009248
rs9953999	chr18	13845637	C	T	0.99517	0.31234	9.39785e-05	-0.036967	0.00946595
rs118089036	chr7	87626537	A	G	0.95441	0.02788	9.40575e-05	0.106417	0.0272511
rs4680442	chr3	151168919	C	T	0.99937	0.22862	9.41759e-05	0.0409872	0.0104968
rs28692603	chr7	144524168	G	T	0.98404	0.35516	9.41808e-05	-0.0362443	0.00928213
rs187992018	chr22	47587412	A	G	0.48194	0.00312	9.4318e-05	0.447268	0.114555
rs7190410	chr16	83741730	C	T	0.99864	0.34874	9.45093e-05	-0.036072	0.00924
rs77360322	chr14	79675743	C	T	0.7751	0.99446	9.48175e-05	0.257598	0.0659982
rs277566	chr9	34813887	C	G	0.99607	0.6441	9.49197e-05	-0.0357612	0.00916286
rs149332465	chr6	156189101	C	T	0.8722	0.99717	9.50024e-05	-0.330312	0.0846381
rs28459424	chr7	144523859	C	T	0.98395	0.35502	9.50116e-05	-0.0362308	0.00928372
rs77487633	chr7	100544201	A	G	0.79149	0.9872	9.50173e-05	-0.177233	0.0454142
rs189893653	chr11	28915290	C	G	0.89858	0.99624	9.51044e-05	0.290151	0.0743523
rs1976071	chr8	10018154	C	G	0.99061	0.43013	9.51393e-05	0.0348998	0.00894342
rs10741381	chr11	90641159	A	G	0.99789	0.45072	9.526e-05	0.0346594	0.00888251
rs73683202	chr8	63628383	C	T	0.93906	0.00103	9.54328e-05	0.546708	0.140126
rs3843029	chr13	93643816	A	G	0.99048	0.74337	9.54832e-05	-0.0397375	0.0101854
rs183304330	chr1	183655750	A	G	0.66876	0.00314	9.55025e-05	-0.351333	0.0900538
rs73166574	chr7	144523399	C	T	0.98376	0.35499	9.5566e-05	-0.0362228	0.00928502
rs114883808	chr3	170198942	C	T	0.6909	0.01443	9.56053e-05	-0.172969	0.0443384
rs140116546	chr3	113538522	C	T	0.57855	0.01169	9.56223e-05	0.209791	0.0537778
rs1923536	chr10	81709809	C	T	0.99174	0.24652	9.569e-05	-0.0398935	0.0102268
rs62498566	chr7	144522930	A	C	0.98333	0.64503	9.57377e-05	0.0362284	0.00928748
rs116346048	chr8	63375753	A	T	0.68788	0.00016	9.58416e-05	1.60712	0.412028
rs60391023	chr7	144526377	A	C	0.98199	0.35492	9.58904e-05	-0.0362489	0.00929367
rs7190768	chr16	83741891	C	T	0.9998	0.3486	9.59687e-05	-0.0360202	0.00923551
rs1110078	chr8	103070067	C	G	0.99844	0.71178	9.62424e-05	0.0378101	0.00969613
rs192879531	chr2	115649505	A	T	0.66936	0.99294	9.6443e-05	0.260209	0.0667375
rs9878065	chr3	139200470	C	T	0.6946	0.03951	9.64491e-05	0.106077	0.0272063
rs277616	chr9	34779868	A	G	0.98675	0.35754	9.66405e-05	0.0358848	0.00920478
rs7936619	chr11	90645390	A	G	0.99821	0.64573	9.67644e-05	-0.0360723	0.00925359
rs2834118	chr21	34542356	A	G	0.89968	0.17495	9.68604e-05	-0.0474107	0.012163
rs277596	chr9	34778083	C	T	0.9856	0.3562	9.69045e-05	0.0359365	0.0092196
rs9478678	chr6	156108663	A	G	0.66435	0.01246	9.6983e-05	0.182495	0.0468219
rs76669832	chr3	138861977	C	T	0.8658	0.05224	9.70251e-05	0.0829774	0.0212897
rs116351897	chr6	25990640	C	T	0.99466	0.00986	9.70577e-05	0.17104	0.043885
rs147715925	chr3	32429377	A	G	0.32759	0.99983	9.71404e-05	-1.47319	0.378008
rs2790213	chr10	60000832	A	C	0.65111	0.94644	9.71742e-05	-0.0937748	0.0240623
rs277595	chr9	34778450	A	G	0.98577	0.64379	9.72559e-05	-0.0359255	0.00921886
rs2256389	chr5	5895454	A	C	0.99941	0.80348	9.72635e-05	-0.0436798	0.0112087
rs146933024	chr3	19651455	A	C	0.63722	0.00568	9.74168e-05	-0.290521	0.0745584
rs12541397	chr8	88103315	A	G	0.9709	0.87605	9.74742e-05	-0.0534931	0.0137288
rs277594	chr9	34778904	C	G	0.98592	0.35623	9.74827e-05	0.0359176	0.00921816
rs1586568	chr15	93919190	G	T	0.99209	0.44849	9.75208e-05	0.0346837	0.00890169
rs147732540	chr1	66207638	A	G	0.91765	0.02188	9.76518e-05	0.121738	0.031247
rs186016298	chr16	82994095	A	G	0.97853	0.99664	9.78095e-05	-0.313626	0.080508
rs714681	chr20	876578	C	T	0.97673	0.90107	9.78349e-05	-0.0589054	0.0151213
rs277599	chr9	34776288	C	T	0.98439	0.64294	9.78377e-05	-0.035911	0.00921854
rs145823100	chr14	79685275	D	I	0.72498	0.005	9.7851e-05	-0.272545	0.0699645
rs9954102	chr18	13845758	C	T	0.99436	0.31231	9.80376e-05	-0.036886	0.00947004
rs10830600	chr11	90644957	C	T	0.99701	0.64505	9.8073e-05	-0.0360452	0.00925438
rs6861317	chr5	22759349	C	T	1.00004	0.50527	9.80922e-05	-0.0342775	0.00880065
rs13183699	chr5	171714639	A	C	0.89295	0.66304	9.81518e-05	0.0381084	0.00978458
rs139294432	chr2	48860930	C	T	0.94348	0.99642	9.81738e-05	0.310938	0.0798366
rs62201239	chr2	229213176	G	T	0.96235	0.9042	9.81747e-05	0.0592037	0.0152012
rs181915813	chr2	205116165	A	C	0.81756	0.99372	9.84342e-05	0.255091	0.065508
rs2284996	chr1	64105799	C	T	0.9627	0.70586	9.8495e-05	-0.0382644	0.00982677
rs58601179	chr14	57848949	A	G	0.46092	0.00029	9.85292e-05	1.48031	0.380171
rs34879496	chr18	13844347	D	I	0.99668	0.68669	9.85786e-05	0.0368178	0.00945578
rs61330475	chr17	73879074	A	C	0.94699	0.8873	9.87054e-05	0.0556008	0.0142809
rs6682817	chr1	59206518	C	T	0.9949	0.29131	9.87661e-05	0.0377972	0.00970845
rs9965069	chr18	13845895	C	T	0.99412	0.68771	9.87846e-05	0.0368728	0.00947113
rs11100368	chr4	162392136	A	G	0.5422	0.00013	9.88603e-05	2.52466	0.648515
rs189233407	chr2	205116164	A	T	0.81758	0.00628	9.89026e-05	-0.255028	0.0655111
rs76227837	chr3	47310701	A	G	0.22903	0.99992	9.89242e-05	-2.56431	0.658724
rs9677920	chr2	120121021	A	G	0.3482	0.00044	9.89833e-05	-1.36078	0.349573
rs2256402	chr5	5895198	A	C	0.9996	0.19656	9.90476e-05	0.043623	0.0112068
rs9377824	chr6	58605556	C	T	0.99944	0.69269	9.90944e-05	0.0370801	0.00952624
rs73345894	chr5	176598548	A	T	0.87361	0.00218	9.91031e-05	0.393724	0.101152
rs35934528	chr14	24739088	A	G	0.72563	0.98929	9.91287e-05	-0.19256	0.0494715
rs9954267	chr18	13845934	G	T	0.994	0.31228	9.91424e-05	-0.0368665	0.00947165
rs1541278	chr18	13844098	A	G	0.99866	0.31294	9.91525e-05	-0.036781	0.00944973
rs1541280	chr18	13844010	A	G	0.99868	0.68705	9.92209e-05	0.0367797	0.0094498
rs9967485	chr18	13846021	A	G	0.99394	0.68773	9.92703e-05	0.0368645	0.0094719
rs981973	chr7	103687969	A	C	0.94402	0.97992	9.92714e-05	-0.130267	0.0334706
rs9961563	chr18	13844486	C	G	0.99761	0.31291	9.94886e-05	-0.0367897	0.00945396
rs9967558	chr18	13846140	A	G	0.99389	0.68773	9.95093e-05	0.03686	0.00947215
rs67716403	chr3	1738824	D	I	0.93358	0.19394	9.95268e-05	-0.0450503	0.011577
rs114119119	chr10	71482055	C	T	0.96498	0.01706	9.95337e-05	-0.137424	0.0353153
rs74549966	chr7	87615992	C	T	0.94955	0.97209	9.95493e-05	-0.106275	0.0273109
rs140882991	chr7	103825932	A	T	0.6442	0.00695	9.96158e-05	-0.253184	0.0650667
rs2301185	chrX	152228776	C	T	0.93859	0.25928	9.97077e-05	0.0331469	0.00851903
rs114932440	chr6	25994841	A	C	0.99607	0.00986	9.97439e-05	0.170657	0.0438613
rs9956835	chr18	13846214	C	T	0.99383	0.31226	9.97538e-05	-0.0368556	0.00947247
rs59289249	chr13	107885919	D	I	0.8532	0.34084	9.97697e-05	-0.0391848	0.0100712
rs116448232	chr6	25993072	A	C	0.99567	0.00986	9.9783e-05	0.170673	0.0438665
rs13409493	chr2	46588488	G	T	0.98694	0.12049	9.97989e-05	-0.0526828	0.0135407
rs1322163	chr9	10187598	A	G	0.99969	0.15738	9.9841e-05	-0.0471002	0.0121062
rs182714856	chr2	115668473	C	T	0.67068	0.00706	9.98459e-05	-0.259442	0.0666846
rs8011669	chr14	90092119	A	G	0.85363	0.64925	9.98756e-05	-0.0383262	0.0098512
rs186928845	chr6	101866980	G	T	0.67503	0.00499	9.98909e-05	0.29169	0.0749752
rs66960211	chr18	13911202	C	T	0.99656	0.21721	9.9927e-05	0.0419609	0.0107858
rs184514776	chr11	37955531	A	T	0.67037	0.99634	9.99479e-05	0.351617	0.090382
rs61194850	chr4	87295574	A	T	0.77229	0.01144	0.000100257	-0.192911	0.0495966
rs11975747	chr7	64212332	A	G	0.87678	0.04948	0.000100382	0.0859776	0.0221063
rs925529	chr3	28193654	C	T	0.99959	0.68392	0.000100472	-0.0369161	0.00949227
rs150612994	chr19	19392009	A	C	0.62327	0.97948	0.000100529	0.150843	0.0387878
rs75493227	chr21	34530720	A	T	0.96854	0.17155	0.000100567	-0.0458754	0.0117967
rs132585	chr22	39991496	A	G	0.98195	0.51468	0.000100583	0.0345738	0.00889059
rs480991	chr6	50598121	A	T	0.83108	0.92501	0.00010065	-0.0722627	0.018583
rs115214	chr3	172290640	A	T	0.93327	0.95678	0.000100668	-0.0853008	0.0219361
rs143453460	chr19	31769293	C	T	0.66932	0.99318	0.000100773	-0.265665	0.0683234
rs331135	chr3	78891439	A	G	0.88777	0.6108	0.000100793	0.0373861	0.00961503
rs2275835	chr1	3742560	A	G	0.99507	0.95116	0.00010093	-0.0803877	0.020676
rs143115602	chr10	107297202	A	C	0.89755	0.0104	0.00010094	0.175901	0.0452426
rs142904834	chr15	81187194	A	C	0.77194	0.99333	0.000101004	-0.235967	0.0606943
rs2693077	chr6	58620258	C	T	0.9861	0.69745	0.00010116	0.0374217	0.00962637
rs144455559	chr16	82996405	C	T	0.91207	0.00365	0.0001012	0.309365	0.0795831
rs114219732	chr6	12202602	A	G	0.59141	0.9825	0.000101214	0.163222	0.0419887
rs117679549	chr10	107327861	C	T	0.88896	0.01045	0.000101306	0.176424	0.0453875
rs117483214	chr8	135627560	A	G	0.95565	0.9897	0.000101347	0.171357	0.0440849
rs8050616	chr16	16037466	C	G	0.94096	0.71483	0.000101358	-0.0390961	0.0100583
rs138856304	chr10	126917350	D	I	0.6437	0.95887	0.000101369	-0.106828	0.0274839
rs77378577	chr1	211235001	A	G	0.54481	0.00047	0.00010157	1.03792	0.267063
rs911692	chr9	10212865	C	T	0.99651	0.86409	0.000101718	0.0503314	0.0129517
rs9945353	chr18	13846759	G	T	0.99334	0.68779	0.000101765	0.0368189	0.00947485
rs12678938	chr8	10016969	C	T	0.99682	0.43376	0.00010177	0.0346222	0.00890957
rs485107	chr8	8581408	C	G	0.99587	0.53525	0.000101819	0.0341336	0.00878411
rs73235267	chr16	88108527	A	G	0.77434	0.93583	0.000101873	-0.0797208	0.0205164
rs277606	chr9	34785308	C	T	0.99998	0.35773	0.000101968	0.0355651	0.00915332
rs147121300	chr19	12109215	C	T	0.83966	0.03069	0.000102025	-0.106209	0.0273359
rs143287224	chr18	73748028	C	T	0.53005	0.99917	0.000102108	-0.846645	0.217919
rs79444949	chr3	16231447	A	G	0.98773	0.97788	0.000102116	-0.115953	0.0298453
rs277613	chr9	34780834	C	T	0.98797	0.64366	0.000102273	-0.0357794	0.00921022
rs11978854	chr7	144531867	A	G	0.97322	0.65665	0.000102408	0.0364991	0.00939625
rs79666294	chr5	154426706	C	T	0.9832	0.02248	0.000102542	0.11601	0.0298677
rs74704040	chr14	79688723	C	T	0.97695	0.99594	0.000102598	0.261138	0.0672346
rs35335689	chr16	16042309	D	I	0.98493	0.31584	0.000102607	0.0370213	0.00953183
rs74926962	chr14	79688771	A	G	0.97772	0.99595	0.000102691	0.261096	0.0672277
rs2256415	chr5	5894870	A	G	0.99994	0.8034	0.000102737	-0.0435078	0.0112028
rs13426171	chr2	69173003	A	G	0.84196	0.97925	0.000102761	-0.130143	0.033511
rs78113665	chr14	79690460	A	G	0.99176	0.00402	0.000102955	-0.260099	0.0669817
rs7159960	chr14	79689476	C	T	0.99244	0.00401	0.000102981	-0.260277	0.0670284
rs4753303	chr11	90612795	A	C	0.99769	0.5747	0.000103112	-0.0346811	0.00893204
rs4592774	chr19	39091668	A	T	0.96814	0.12759	0.000103165	0.0516487	0.0133025
rs7160473	chr14	79689618	A	G	0.99407	0.996	0.000103165	0.260201	0.0670165
rs75360780	chr2	119995046	A	C	0.90869	0.89799	0.000103166	0.0594171	0.0153033
rs2067367	chr2	117843946	D	I	0.99863	0.21799	0.00010318	-0.041017	0.0105643
rs7159422	chr14	79689302	A	C	0.98755	0.00402	0.000103207	-0.260538	0.0671049
rs186116237	chr6	101901458	C	T	0.58477	0.00832	0.000103272	-0.237633	0.0612079
rs277612	chr9	34780901	A	G	0.98834	0.35641	0.000103314	0.0357497	0.00920839
rs189462831	chr1	41029318	A	C	0.71499	0.99577	0.000103364	-0.321806	0.0828932
rs139959605	chr14	79689907	D	I	0.99488	0.004	0.000103368	-0.260148	0.0670111
rs12532772	chr7	47079979	G	T	0.98707	0.66006	0.000103404	0.0363124	0.00935385
rs2811651	chr6	91980786	G	T	0.85129	0.98997	0.000103408	-0.182713	0.0470659
rs145962486	chr12	9866484	C	T	0.6033	0.00678	0.000103489	0.250766	0.064599
rs2146966	chr14	90255453	C	T	0.99557	0.4424	0.000103591	0.0343558	0.00885085
rs185688782	chr1	204256892	C	T	0.55584	0.00053	0.000103672	-1.02403	0.263828
rs12679184	chr8	126487511	C	T	0.99876	0.17576	0.000103731	-0.045166	0.0116368
rs184066924	chr3	40056244	G	T	0.85569	0.00234	0.000103733	0.43801	0.112851
rs181197466	chr13	115019652	G	T	0.79675	0.00023	0.000103738	1.24521	0.320822
rs75449079	chr14	79691137	A	G	0.99173	0.00402	0.000103768	-0.259978	0.0669835
rs79379434	chr19	33561038	A	G	0.78991	0.97644	0.000103924	-0.133418	0.0343787
rs144042274	chr14	79675796	D	I	0.78086	0.00552	0.000103985	-0.255432	0.0658207
rs184075504	chr3	19580923	A	G	0.63381	0.99396	0.000104052	0.283395	0.0730293
rs77074859	chr14	79677345	C	T	0.78502	0.00546	0.000104056	-0.255561	0.0658568
rs4870942	chr8	126498903	C	T	0.99601	0.25487	0.000104177	-0.0394412	0.0101645
rs1541279	chr18	13844057	C	T	0.99993	0.68738	0.000104232	0.03666	0.00944812
rs112063588	chr2	205114418	C	T	0.81791	0.00627	0.00010424	-0.254387	0.0655615
rs78761473	chr14	79690345	C	T	0.99734	0.00399	0.000104243	-0.259939	0.0669927
rs116304056	chr1	19045823	A	G	0.56518	0.99037	0.000104273	-0.219929	0.056682
rs968953	chr9	10212591	A	G	0.99535	0.136	0.000104273	-0.0502713	0.0129564
rs201898977	chr18	56112361	D	I	0.92594	0.74735	0.000104362	-0.0405857	0.0104607
rs6741032	chr2	229220121	C	T	0.95285	0.90549	0.000104487	0.0596062	0.0153642
rs2177678	chr11	90632147	A	G	0.99924	0.57501	0.000104523	-0.0346158	0.00892284
rs12458307	chr18	13845074	A	G	0.99589	0.31343	0.000104558	-0.0366895	0.00945757
rs17108966	chr14	79690398	A	C	0.99899	0.99601	0.000104588	0.259841	0.0669813
rs7160122	chr14	79689439	C	G	0.99145	0.99599	0.000104596	0.260045	0.0670342
rs148603533	chr14	79694019	D	I	0.99448	0.996	0.000104803	0.259977	0.0670248
rs62111431	chr19	7201821	G	T	0.60348	0.02359	0.000104833	-0.144225	0.0371834
rs75809640	chr14	79690516	A	T	0.99896	0.00399	0.000104888	-0.259798	0.0669821
rs7858217	chr9	10212611	G	T	0.99572	0.13596	0.000104902	-0.050249	0.0129555
rs79512001	chr14	79690739	A	T	0.99895	0.00399	0.000105022	-0.259778	0.0669824
rs184488094	chr10	131858899	A	T	0.70145	0.00079	0.000105157	-0.754167	0.194474
rs77401963	chr14	79690819	C	T	0.99895	0.00399	0.000105179	-0.259756	0.0669828
rs35293761	chr18	13899496	A	G	0.9965	0.22327	0.00010519	0.0414109	0.0106786
rs112951751	chr7	100546591	A	G	0.78908	0.01291	0.000105303	0.17565	0.0452979
rs202082980	chr12	32500576	D	I	0.56931	0.08225	0.000105327	-0.0811774	0.020935
rs76230656	chr14	79690855	A	G	0.99895	0.99601	0.000105336	0.259733	0.0669832
rs34615701	chr18	13899137	C	T	0.99651	0.22328	0.000105355	0.0414064	0.0106785
rs79092320	chr16	88792895	C	G	0.92118	0.0989	0.000105378	-0.0592321	0.0152759
rs78017862	chr16	88771173	A	G	0.97392	0.11857	0.000105413	-0.0532228	0.0137264
rs183276783	chr5	13088250	A	G	0.69044	0.00234	0.000105475	0.403836	0.104155
rs1524957	chr11	90639742	C	G	0.9995	0.64383	0.000105605	-0.0357893	0.00923129
rs138194224	chr2	188917425	A	G	0.70414	0.99246	0.000105652	-0.235543	0.0607564
rs77012294	chr14	79691167	A	G	0.99896	0.99601	0.000105657	0.259686	0.0669838
rs62201241	chr2	229217977	A	G	0.95697	0.90627	0.000105703	0.0596862	0.015396
rs78491393	chr14	79692250	A	G	0.9926	0.99598	0.000105823	0.259665	0.0669851
rs77913367	chr14	79693663	C	T	0.99555	0.996	0.000105837	0.259788	0.0670175
rs79680103	chr14	79691734	A	G	0.99898	0.99601	0.000105977	0.259639	0.0669845
rs76589236	chr12	129375755	A	G	0.54935	0.99829	0.000106158	0.635295	0.163918
rs192028843	chr10	131858897	A	C	0.7018	0.99921	0.000106167	0.753822	0.194502
rs224206	chr16	3297073	A	G	0.98279	0.54321	0.000106173	-0.0344871	0.00889841
rs72686607	chr14	46688897	A	G	0.84933	0.85259	0.000106176	0.051803	0.0133663
rs2195367	chr5	113012575	A	G	0.89064	0.86312	0.000106202	0.052389	0.0135177
rs80280160	chr14	79691871	C	T	0.999	0.00399	0.000106276	-0.259595	0.066985
rs5770343	chr22	49778924	C	T	0.92261	0.51201	0.000106363	0.0351021	0.00905811
rs34132519	chr9	34813879	D	I	0.99552	0.64374	0.000106411	-0.0355009	0.00916126
rs144373418	chr14	79692192	A	C	0.99902	0.00399	0.000106438	-0.259571	0.0669852
rs1531623	chr14	79668570	A	G	0.74854	0.00561	0.000106638	-0.258044	0.0665991
rs7145315	chr14	79692312	A	G	0.99907	0.00399	0.00010674	-0.259526	0.0669857
rs7145792	chr14	79692353	A	G	0.99909	0.99601	0.000106835	0.259513	0.0669859
rs4145856	chr6	40299651	C	T	0.97899	0.00175	0.000106853	0.405319	0.104623
rs74886965	chr14	79667879	C	G	0.74708	0.00561	0.000106911	-0.258137	0.0666338
rs7145504	chr14	79692416	A	G	0.99912	0.00399	0.000106999	-0.259488	0.0669861
rs7154580	chr14	79669775	A	C	0.74709	0.00565	0.000107065	-0.257621	0.0665067
rs66957356	chr6	40300074	C	G	0.97684	0.00175	0.000107166	0.4053	0.104637
rs148831141	chr4	53532492	A	C	0.47485	9e-05	0.00010723	2.59962	0.671174
rs332890	chr2	117845654	A	C	0.99882	0.21788	0.000107237	-0.0409191	0.0105646
rs35608204	chr11	113285793	A	G	0.86846	0.02775	0.000107335	-0.108093	0.0279093
rs115694817	chr2	47769844	A	G	0.88032	0.0036	0.000107401	-0.287177	0.0741515
rs77974540	chr2	176298368	C	T	0.79042	0.02476	0.000107438	-0.124355	0.0321102
rs71659195	chr1	99920411	A	G	0.6608	0.02195	0.000107457	0.146907	0.0379337
rs7145670	chr14	79692481	A	G	0.99916	0.00399	0.000107473	-0.259418	0.0669865
rs112903074	chr13	99044725	G	T	0.95691	0.98439	0.000107502	0.137519	0.0355107
rs6792767	chr3	151146623	A	G	0.90786	0.95225	0.000107509	-0.0843488	0.0217809
rs75882555	chr18	76466711	C	T	0.97627	0.09279	0.000107595	0.0586679	0.0151502
rs73066215	chr1	195517877	A	G	0.80243	0.00153	0.000108009	-0.491297	0.126902
rs314102	chr4	189321030	A	G	0.96747	0.74111	0.00010814	-0.0394411	0.0101884
rs4816875	chr21	24346970	C	T	0.98669	0.42233	0.000108232	0.0346258	0.00894498
rs7151352	chr14	79693013	A	G	0.99935	0.99601	0.00010827	0.259299	0.066987
rs182963281	chr13	70257343	C	G	0.91516	0.9986	0.000108456	0.43991	0.113658
rs140291746	chr8	23199615	A	G	0.70912	0.98936	0.000108513	0.197519	0.0510339
rs4905616	chr14	98180093	A	G	0.97095	0.22604	0.0001086	-0.0411068	0.0106215
rs79807471	chr5	154407387	C	T	0.97803	0.977	0.000108735	-0.114859	0.0296805
rs4905614	chr14	98179357	C	T	0.97183	0.77381	0.000108765	0.0410751	0.0106144
rs12881170	chr14	40856027	C	G	0.9777	0.22912	0.000108989	0.0410991	0.0106219
rs4317948	chr11	90599460	C	T	0.99252	0.4492	0.000109028	0.034489	0.00891377
rs60556070	chr10	71476049	G	T	0.96597	0.01691	0.000109078	-0.137687	0.0355865
rs73152594	chr22	25146534	A	C	0.98898	0.80263	0.000109229	0.043085	0.0111367
rs4337085	chr12	96849993	A	G	0.9741	0.45035	0.000109694	0.0346581	0.0089609
rs28409538	chr3	66139890	C	G	0.92008	0.6504	0.0001098	0.037256	0.00963318
rs6595477	chr5	123142372	A	G	0.99904	0.30894	0.000109807	0.0369416	0.00955193
rs111646994	chr1	208243078	A	G	0.48225	0.99978	0.000109829	-1.2807	0.331153
rs4905613	chr14	98178921	A	T	0.96571	0.77605	0.000109833	0.0413416	0.0106898
rs57437132	chr6	40303680	A	C	0.96402	0.99823	0.000110228	-0.404876	0.104713
rs72696977	chr9	10214206	C	T	0.99781	0.86412	0.000110341	0.0500546	0.0129465
rs147836660	chr5	136439338	C	T	0.70703	0.01818	0.000110362	0.151214	0.0391115
rs117111930	chr9	84307240	A	G	0.65501	0.99648	0.000110484	0.361231	0.0934392
rs114862458	chr10	71473889	A	C	0.96507	0.98313	0.000110575	0.137859	0.0356617
rs6873971	chr5	123140674	A	C	0.99875	0.69123	0.00011061	-0.0369382	0.00955544
rs192456885	chr15	44855630	C	G	0.61381	0.99477	0.000110672	-0.298249	0.0771561
rs77432037	chr14	79681532	A	G	0.79908	0.99509	0.000110719	0.263624	0.0682005
rs187083518	chr17	70971873	C	T	0.84846	0.00204	0.000110746	0.39041	0.101002
rs6123304	chr20	52279092	A	T	0.82473	0.10179	0.000110842	0.0617159	0.0159672
rs6889859	chr5	123148901	C	G	0.997	0.1888	0.000110999	-0.0438104	0.0113357
rs138503049	chr18	76481373	D	I	0.92867	0.08468	0.00011111	0.0623332	0.0161294
rs9859123	chr3	55676039	A	G	0.36066	0.99981	0.000111111	-1.95863	0.506817
rs6889502	chr5	8549870	C	G	0.99737	0.9382	0.000111217	-0.0701193	0.0181452
rs11080691	chr18	13844808	C	T	0.98648	0.44199	0.000111379	-0.0344247	0.00890913
rs13345885	chr19	39100737	A	G	0.97809	0.12964	0.000111398	0.0508451	0.0131589
rs149921846	chr4	9764774	D	I	0.76836	0.05825	0.000111402	-0.0816121	0.0211215
rs79703367	chr14	79683673	C	T	0.79576	0.00491	0.000111471	-0.264649	0.0684948
rs2730354	chr3	16226757	A	G	0.98331	0.02303	0.000111482	0.113197	0.0292971
rs4905615	chr14	98179460	A	G	0.97141	0.22617	0.000111557	-0.0410206	0.0106172
rs4311894	chr1	221202607	A	G	0.99626	0.70699	0.000111591	-0.0376785	0.0097524
rs5781199	chr1	221202698	D	I	0.99581	0.70698	0.000111596	-0.0376871	0.00975463
rs1102452	chr1	77444121	A	G	0.9502	0.85836	0.00011167	0.0498718	0.012909
rs74141294	chr1	221197421	A	G	0.99396	0.70858	0.000111733	-0.0377907	0.00978222
rs75156858	chr14	79680760	A	G	0.79911	0.00491	0.000111782	-0.263456	0.0681982
rs148817172	chr14	51925868	A	G	0.8902	0.99808	0.000111934	-0.428307	0.110881
rs149293106	chr10	64819134	A	C	0.89149	0.99811	0.000111974	-0.392418	0.101592
rs6887227	chr5	8549354	A	G	0.99724	0.0618	0.000112118	0.0700886	0.0181465
rs4799193	chr18	76469400	C	T	0.9805	0.09289	0.000112247	0.0583274	0.0151026
rs11159931	chr14	90264275	G	T	0.99686	0.55875	0.000112369	-0.0341941	0.00885441
rs17009262	chr1	221200503	A	G	0.99984	0.70704	0.000112378	-0.0375968	0.00973557
rs149693390	chr12	69466359	C	T	0.69743	0.01312	0.00011245	-0.174939	0.0453017
rs73402292	chr18	21630672	C	T	0.45596	0.00016	0.000112522	2.33543	0.604801
rs2498597	chr9	10211972	C	T	0.99488	0.86419	0.000112564	0.0500823	0.01297
rs9833544	chr3	28198047	C	T	0.99423	0.68104	0.000112665	-0.0366484	0.00949151
rs11080692	chr18	13844916	C	T	0.99637	0.68665	0.00011267	0.0365099	0.00945566
rs7103276	chr11	90632899	A	C	0.99783	0.5752	0.000112692	-0.0344734	0.00892835
rs142299821	chr1	183715631	A	G	0.62499	0.00352	0.000112733	-0.342594	0.0887312
rs2455458	chr5	14665615	A	G	0.97809	0.58632	0.000112735	0.0349778	0.00905921
rs74671901	chr18	76481079	A	G	0.98043	0.90753	0.000112749	-0.0583419	0.0151106
rs73066214	chr1	195517578	C	T	0.83882	0.99855	0.000112772	0.49248	0.127554
rs450021	chr16	3292085	A	C	0.99788	0.45532	0.00011295	0.0342097	0.00886132
rs12931683	chr16	16036778	A	G	0.98737	0.72349	0.000113152	-0.0382733	0.00991505
rs4332800	chr18	13844412	A	G	0.99439	0.68626	0.000113213	0.0365265	0.00946286
rs116424157	chr1	20297593	A	G	0.75882	0.02679	0.000113254	0.120456	0.0312069
rs115368725	chr7	96021678	A	G	0.75449	0.0044	0.000113484	-0.296712	0.0768803
rs189657966	chr2	54487695	A	G	0.55204	0.00181	0.00011353	-0.543154	0.140739
rs2408624	chr21	24347791	A	T	0.98532	0.42255	0.000113578	0.0345311	0.00894772
rs57399840	chr9	133426121	A	G	0.96007	0.18825	0.000113673	-0.044267	0.0114711
rs188718951	chr4	44585033	A	G	0.86529	0.9965	0.000113703	-0.293693	0.0761072
rs778961	chr4	63278264	A	G	0.97133	0.85036	0.000113779	0.0480798	0.0124599
rs62538587	chr9	10218589	C	G	0.99781	0.13577	0.000113783	-0.0500045	0.0129587
rs10758278	chr9	34825303	A	G	0.99392	0.35712	0.000113836	0.0353398	0.00915858
rs11961199	chr6	166349324	C	T	0.97927	0.95456	0.00011385	-0.0812171	0.0210482
rs2901077	chr19	13888558	C	T	0.66606	0.09477	0.000113972	0.0710356	0.0184108
rs112999228	chr3	111244497	C	T	0.24833	9e-05	0.00011409	4.06974	1.05485
rs138826308	chr1	15025127	C	T	0.56411	0.99523	0.000114133	-0.329487	0.0854033
rs143554100	chr2	38899903	C	G	0.76398	0.00233	0.000114183	0.413787	0.107257
rs332897	chr2	117848328	C	T	0.99769	0.21769	0.000114185	-0.0407856	0.010572
rs28707575	chr3	66137331	C	T	0.91686	0.34883	0.000114188	-0.0372515	0.00965593
rs111777203	chr17	73839777	C	G	0.91938	0.06541	0.000114243	-0.0711761	0.01845
rs191283218	chr3	67900803	C	T	0.5652	0.00165	0.000114285	0.51782	0.134231
rs72442317	chr8	126499238	D	I	0.99633	0.74524	0.00011442	0.0392132	0.0101657
rs2172437	chr3	28193977	C	T	0.99986	0.31604	0.000114579	0.0366099	0.00949167
rs12403561	chr1	3717404	A	G	0.91602	0.94824	0.000114608	-0.0807113	0.0209259
rs2287733	chr19	39101669	A	G	0.98921	0.12877	0.000114704	0.0506417	0.0131305
rs117904008	chr12	70286023	A	G	0.80256	0.9898	0.000114763	0.18325	0.0475151
rs117393227	chr20	5552694	A	G	0.61293	0.97946	0.000114861	-0.151612	0.0393138
rs17018878	chr1	212434269	C	T	0.91152	0.00118	0.00011488	0.579486	0.150265
rs4540828	chr11	44961959	A	T	0.99098	0.16987	0.000114939	0.0451613	0.0117111
rs115745564	chr2	120093782	C	G	0.31972	0.00044	0.000114975	-1.42836	0.370406
rs2287732	chr19	39101870	C	T	0.9895	0.87126	0.000115092	-0.0506307	0.0131305
rs140002622	chr4	186847245	D	I	0.83462	0.99796	0.000115136	-0.431593	0.111931
rs117246830	chr6	93655426	A	G	0.90844	0.98866	0.000115187	-0.169172	0.0438751
rs1596176	chr5	22773959	A	G	0.9852	0.50669	0.000115455	0.0341847	0.00886717
rs4567057	chr8	126486906	A	G	1.00006	0.17547	0.000115632	-0.0448708	0.0116402
rs4567059	chr8	126486287	G	T	1.00006	0.82454	0.000115632	0.0448708	0.0116402
rs73127765	chr3	66137541	A	G	0.91776	0.34896	0.00011573	-0.0371992	0.00965058
rs73265911	chr7	1055363	A	G	0.99138	0.90718	0.000115835	-0.0579392	0.015032
rs4400555	chr1	3779151	C	T	0.94282	0.94866	0.000115956	-0.079994	0.0207554
rs80101001	chr5	154421179	A	G	0.98087	0.02318	0.000116017	0.113494	0.0294484
rs62120354	chr19	39094037	C	T	0.96259	0.86985	0.000116039	-0.0510108	0.013236
rs9424286	chr1	3715931	G	T	0.91038	0.05184	0.000116087	0.0808048	0.0209672
rs149585908	chr19	28498508	C	T	0.76319	0.00765	0.00011609	0.219999	0.0570856
rs141190853	chr4	103623564	C	T	0.84762	0.06784	0.000116165	0.0726185	0.0188439
rs4592055	chr8	126486145	C	T	1.00002	0.82454	0.000116332	0.0448546	0.0116404
rs145445744	chr7	135325116	A	G	0.70115	0.00021	0.00011653	1.1881	0.308363
rs36178569	chr4	96589295	C	G	0.58475	0.81162	0.000116573	0.0568669	0.0147597
rs138023438	chr1	212428292	D	I	0.85193	0.99874	0.000116601	-0.579874	0.150508
rs147650507	chr5	91759105	C	T	0.66595	0.99483	0.00011665	0.288119	0.0747842
rs12545963	chr8	126486117	C	T	1	0.17546	0.000116679	-0.0448465	0.0116405
rs36143576	chr4	96589304	C	T	0.58475	0.81162	0.00011669	0.0568631	0.0147597
rs57296914	chr15	24973989	A	T	0.973	0.6529	0.000116764	-0.0360996	0.00937059
rs72786236	chr5	119802335	A	G	0.74055	0.99877	0.00011683	-0.713501	0.185214
rs183777875	chr7	135318406	G	T	0.7092	0.00021	0.000116945	1.18446	0.307488
rs200982092	chr1	212443161	D	I	0.91552	0.00114	0.000117031	0.582625	0.151258
rs10466951	chr12	96876526	A	G	0.98759	0.54714	0.000117137	-0.0343108	0.00890806
rs144528889	chr1	120161979	A	C	0.80709	0.99844	0.000117173	-0.4767	0.123768
rs146283918	chr9	13753248	G	T	0.74058	0.01252	0.000117327	-0.175177	0.0454857
rs183599307	chr5	91757419	C	T	0.6658	0.00516	0.000117419	-0.288134	0.0748192
rs35604733	chr5	42711737	A	G	0.9224	0.98696	0.000117424	0.155624	0.0404107
rs199818424	chr1	212443162	D	I	0.91554	0.00114	0.00011744	0.582487	0.151255
rs17009288	chr1	221204299	A	C	0.99181	0.29334	0.000117444	0.0376318	0.00977191
rs28654383	chr12	10900933	C	T	0.94182	0.01487	0.000117548	-0.149547	0.0388354
rs12607568	chr18	76474742	A	G	0.99186	0.09314	0.000117641	0.0577507	0.0149978
rs181761059	chr7	135308514	A	G	0.71526	0.99979	0.000117643	-1.18191	0.306941
rs62246866	chr3	66134261	C	T	0.91225	0.65127	0.000117724	0.0372792	0.00968183
rs61992489	chr14	102553167	G	T	0.9962	0.15793	0.00011779	-0.0464282	0.0120583
rs146822337	chr3	66136183	D	I	0.9141	0.3486	0.000117793	-0.0372424	0.00967263
rs17006912	chr3	20421007	A	G	0.93802	0.9499	0.000117839	0.0801698	0.0208223
rs913005	chr13	93477843	A	G	0.99552	0.54779	0.000117875	0.0340382	0.00884083
rs74993706	chr17	73878852	A	G	0.98503	0.89916	0.000117937	0.0567409	0.0147379
rs77011142	chr18	76471900	A	T	0.985	0.09301	0.000117965	0.0579883	0.0150622
rs1703982	chr8	8598388	A	T	0.99154	0.52662	0.000118059	0.0339836	0.00882752
rs149082782	chr6	25978390	C	T	0.99438	0.00977	0.000118075	0.169789	0.0441045
rs6085198	chr20	605422	C	G	0.97757	0.38599	0.00011809	-0.0350225	0.00909753
rs7315210	chr12	96882865	G	T	0.98354	0.4535	0.000118134	0.0343452	0.00892181
rs72922677	chr6	93126765	C	T	0.98698	0.06698	0.000118189	-0.0682458	0.0177286
rs36012720	chr1	99852417	A	C	0.63862	0.02249	0.000118303	0.14732	0.0382725
rs188774871	chr7	135233538	C	T	0.77875	0.9998	0.000118391	-1.17174	0.304424
rs114738477	chr2	38281601	C	T	0.72115	0.0026	0.000118442	-0.375522	0.097565
rs7828701	chr8	126485773	C	G	0.9999	0.17547	0.000118451	-0.0448056	0.0116411
rs78252475	chr14	79693715	C	T	0.99168	0.00398	0.00011847	-0.259218	0.0673489
rs1377779	chr11	44344634	C	T	0.97311	0.77911	0.000118504	0.0414936	0.0107809
rs10741382	chr11	90643566	G	T	0.99982	0.35628	0.000118524	0.0355199	0.0092289
rs4905617	chr14	98182849	A	T	0.96881	0.22603	0.000119034	-0.0409396	0.01064
rs4729041	chr7	92063500	G	T	0.98538	0.13625	0.000119071	-0.0496002	0.0128911
rs3913664	chr11	88313677	C	T	0.90841	0.09294	0.000119158	0.0617585	0.0160517
rs1529980	chr2	117851033	A	G	0.99684	0.21757	0.00011917	-0.0406983	0.010578
rs262926	chr6	37141346	G	T	0.41055	0.99982	0.00011928	-1.47524	0.383457
rs3749572	chr4	170017669	C	T	0.95138	0.02662	0.000119324	-0.107484	0.0279387
rs73143209	chr20	57362381	A	G	0.98906	0.81603	0.000119387	0.0439597	0.011427
rs201021617	chr17	73879073	D	I	0.97834	0.89363	0.000119423	0.0555502	0.0144402
rs117455914	chr19	12884775	C	G	0.51461	0.01022	0.000119439	-0.22955	0.0596716
rs12659910	chr5	171658243	A	G	0.99553	0.22603	0.00011961	-0.0404236	0.0105091
rs2972752	chr5	42751418	A	G	0.98545	0.98977	0.000119644	0.171468	0.0445781
rs12659926	chr5	171658346	A	G	0.99548	0.22603	0.000119674	-0.0404233	0.0105094
rs8104674	chr19	12369506	A	G	0.95207	0.90096	0.000119742	0.0572555	0.014886
rs139207261	chr14	79690286	D	I	0.97572	0.00408	0.000119757	-0.257634	0.0669835
rs78369901	chr5	123164720	C	T	0.98366	0.08484	0.000119839	0.0612412	0.0159231
rs34417638	chr8	126488574	C	T	0.99889	0.82455	0.000119891	0.044783	0.0116442
rs4799195	chr18	76476200	G	T	0.99237	0.09317	0.000120092	0.0576316	0.0149866
rs9973390	chr2	156165518	A	G	0.97805	0.26633	0.000120105	-0.0390114	0.0101446
rs192915364	chr7	135296689	C	T	0.71937	0.00021	0.000120116	1.17907	0.306609
rs192672876	chr7	135297305	C	T	0.71886	0.00021	0.00012017	1.17906	0.306616
rs73295016	chr14	40569224	A	G	0.97428	0.13903	0.000120322	0.0494403	0.0128581
rs35809146	chr6	58667062	D	I	0.91828	0.27846	0.000120612	-0.0393433	0.0102337
rs35678833	chr14	40569125	G	T	0.97414	0.86097	0.000120627	-0.0494367	0.0128592
rs17055591	chr3	55674578	A	G	0.36174	0.00019	0.000120639	1.94923	0.507026
rs12893102	chr14	90271952	C	G	0.99707	0.44106	0.00012066	0.0340386	0.0088541
rs34604874	chr8	126487857	A	G	0.99935	0.82454	0.000120667	0.0447578	0.0116424
rs6575627	chr14	98181918	A	T	0.96916	0.77395	0.000120718	0.0408973	0.0106385
rs185586174	chr11	36952618	C	T	0.52222	0.00283	0.000120751	-0.452438	0.117694
rs7557853	chr2	156163052	A	T	0.9776	0.26631	0.000120802	-0.0390085	0.0101476
rs148960041	chr9	13740944	A	G	0.84916	0.98958	0.000120805	0.179676	0.0467409
rs277579	chr9	34772268	A	G	0.9776	0.35227	0.000120839	0.0355931	0.00925933
rs112625299	chr5	123164885	C	T	0.9834	0.91514	0.000120932	-0.0612048	0.0159228
rs11134315	chr5	8559754	A	G	0.9822	0.9383	0.000120965	-0.070268	0.018281
rs11624615	chr14	96047421	G	T	0.99977	0.34986	0.000121094	0.0353755	0.00920396
rs185534422	chr1	183642196	C	T	0.63576	0.99655	0.000121185	0.341961	0.0889753
rs155223	chr5	165056030	C	T	0.99884	0.23955	0.000121197	-0.0396026	0.0103043
rs59854314	chr10	44191050	C	T	0.52051	0.00071	0.000121306	0.826088	0.214954
rs143682044	chr7	135283679	A	G	0.72436	0.99979	0.000121394	-1.17683	0.306235
rs111973672	chr22	25146685	C	T	0.9873	0.19706	0.000121493	-0.0428484	0.0111506
rs13248085	chr8	34081655	G	T	0.94507	0.91257	0.000121503	-0.0624899	0.016262
rs200498960	chr1	212443164	D	I	0.91287	0.00115	0.000121504	0.580746	0.15113
rs57081631	chr8	9791319	A	G	0.9494	0.87003	0.000121552	0.0514319	0.0133847
rs58678961	chr2	156160087	C	T	0.97705	0.26628	0.000121617	-0.0390044	0.0101509
rs191951538	chr22	50929031	A	G	0.43846	0.99958	0.000121625	-1.13215	0.294644
rs186412749	chr9	103441910	A	T	0.23983	0.9999	0.000121764	-2.36281	0.614969
rs7828194	chr8	126485283	A	G	0.99986	0.82453	0.00012184	0.0447254	0.0116412
rs76406108	chr5	42857806	C	T	0.62317	0.9844	0.000121892	0.175413	0.0456579
rs113887711	chr1	195520245	A	T	0.78265	0.99853	0.000122034	0.496108	0.12914
rs79467512	chr12	110057189	G	T	0.76263	0.02217	0.000122099	-0.132532	0.0345002
rs17620627	chr9	10193737	A	T	0.99727	0.84527	0.000122159	0.0469378	0.0122191
rs76111398	chr18	76472875	A	G	0.98837	0.09304	0.000122236	0.057741	0.015032
rs297285	chr4	27639755	A	T	0.77561	0.98296	0.000122238	-0.146252	0.0380744
rs147873152	chr17	38526511	A	C	0.78055	0.97029	0.000122344	-0.111153	0.0289386
rs188049646	chr7	135272279	A	G	0.72838	0.00021	0.000122346	1.17511	0.30594
rs77481677	chr14	79685510	A	G	0.81448	0.99524	0.00012239	0.262034	0.068222
rs12888282	chr14	90265319	C	G	0.99676	0.55882	0.000122395	-0.0340113	0.00885506
rs75988962	chr17	73824786	C	T	0.97644	0.12219	0.000122448	-0.0525275	0.0136762
rs146988369	chr17	34081	D	I	0.67901	0.98464	0.00012254	0.170284	0.0443378
rs140976140	chr3	61809122	A	G	0.93073	0.0706	0.000122615	-0.0689015	0.017941
rs144198152	chr7	135273327	C	T	0.72803	0.99979	0.000122638	-1.17492	0.305937
rs11242120	chr5	131870689	C	T	0.98418	0.66522	0.000122671	-0.0360831	0.00939583
rs2060574	chr15	96293570	A	G	0.88933	0.74548	0.000122753	-0.0407837	0.0106203
rs201498664	chr5	42646552	D	I	0.95532	0.01086	0.000122805	-0.169744	0.0442033
rs200936650	chr6	26733128	D	I	0.5546	0.02851	0.000122833	-0.136982	0.0356722
rs150285250	chr12	110056169	A	G	0.76268	0.97787	0.000122871	0.132577	0.0345259
rs13358102	chr5	171650965	A	G	1.00005	0.4058	0.000122877	-0.0343427	0.0089436
rs140525450	chr3	111243400	C	T	0.24849	9e-05	0.000122901	4.08117	1.06284
rs188877260	chr7	36893931	C	T	0.67734	0.00139	0.000123061	0.677977	0.176577
rs36195663	chr4	96589406	A	G	0.58427	0.18815	0.000123074	-0.056721	0.0147729
rs3858833	chr13	93641360	G	T	0.97729	0.27865	0.000123074	0.0383333	0.00998386
rs180698197	chr14	46027311	C	T	0.74388	0.00753	0.000123123	0.220864	0.0575251
rs6687799	chr1	59283685	C	G	0.86394	0.27714	0.000123311	0.0405843	0.0105714
rs111473350	chr14	79729727	D	I	0.98089	0.99514	0.000123358	0.238128	0.0620291
rs77152569	chr14	79730191	A	G	0.98083	0.99514	0.000123361	0.238094	0.0620204
rs56897195	chr2	36947273	C	T	0.51718	0.99319	0.00012339	-0.311019	0.0810177
rs112883316	chr14	79730167	D	I	0.98085	0.00486	0.000123452	-0.238093	0.0620232
rs2148228	chr13	93464816	G	T	0.98934	0.45234	0.000123466	-0.0340356	0.00886632
rs111672076	chr22	39992246	A	G	0.9769	0.51374	0.000123485	0.0341874	0.00890595
rs116582827	chr4	116706005	C	T	0.64576	0.01753	0.000123487	0.154315	0.0401998
rs191072581	chr5	150442690	A	G	0.74655	0.99916	0.000123595	-0.704556	0.18355
rs45528633	chr14	96000090	A	G	0.97189	0.70454	0.000123652	0.0374874	0.00976647
rs13265432	chr8	126484709	A	G	0.99988	0.82452	0.000123699	0.0446811	0.0116409
rs145239764	chr3	57137410	C	T	0.87722	0.99471	0.000123736	-0.249944	0.06512
rs182413566	chr13	98047759	G	T	0.84053	0.99724	0.000123744	-0.334375	0.0871176
rs111921191	chr5	176549147	C	G	0.64457	0.99677	0.000123836	-0.379168	0.0987929
rs8006973	chr14	96048645	C	T	1.00003	0.34986	0.00012387	0.035321	0.0092031
rs4008439	chr9	34865627	A	G	0.98853	0.61322	0.000123901	-0.034732	0.00904977
rs142257607	chr8	86910716	A	G	0.53809	0.00192	0.000123931	-0.502424	0.130914
rs117766423	chr20	5545248	A	G	0.61281	0.97947	0.000123937	-0.150919	0.0393242
rs188229354	chr7	135267405	G	T	0.72986	0.00021	0.00012398	1.17364	0.305816
rs191783701	chr4	7545804	C	T	0.68433	0.00101	0.000124134	-0.655274	0.170759
rs11160400	chr14	98181251	A	G	0.96984	0.77388	0.000124207	0.0407889	0.0106296
rs10814172	chr9	34865661	A	C	0.98859	0.61322	0.000124258	-0.0347245	0.00904948
rs12752499	chr1	59286306	A	G	0.86293	0.27698	0.000124357	0.040593	0.0105794
rs262930	chr6	37144886	C	T	0.3819	0.99981	0.000124361	-1.47423	0.384217
rs145776500	chr15	44712945	G	T	0.64149	0.99491	0.000124364	-0.293533	0.0765012
rs189603918	chr1	200877281	C	T	0.89043	0.00712	0.000124553	0.209918	0.0547147
rs142720980	chr8	98217511	C	T	0.80987	0.96234	0.000124561	0.0987495	0.0257389
rs77390477	chr5	176549534	C	G	0.64341	0.00324	0.000124734	0.378965	0.0987856
rs10999473	chr10	72452582	C	T	0.95641	0.25416	0.000124802	0.0396829	0.0103446
rs12590926	chr14	98181439	C	T	0.96973	0.77389	0.000124828	0.0407791	0.0106305
rs188167660	chr7	135264219	A	G	0.73142	0.00021	0.000124832	1.17301	0.305787
rs1886082	chr14	90177516	C	T	0.83685	0.3557	0.000124876	0.0382449	0.00997011
rs76749540	chr14	79725158	C	T	0.98138	0.99514	0.000124986	0.238117	0.0620785
rs67338868	chr10	60028838	D	I	0.61349	0.94809	0.000125011	-0.0965073	0.0251603
rs2032058	chr9	21125821	A	C	0.91348	0.04977	0.000125062	0.0813418	0.0212071
rs187932428	chr20	51780739	A	G	0.69573	0.00443	0.000125084	0.325158	0.0847748
rs2638547	chr6	118995471	A	G	0.97096	0.29055	0.000125193	0.0378605	0.0098715
rs143877729	chr13	115014450	A	G	0.79584	0.99976	0.000125285	-1.21519	0.316857
rs145629478	chr2	36948868	D	I	0.52502	0.99345	0.000125309	-0.314029	0.0818826
rs10792473	chr11	79907430	C	T	0.99178	0.17502	0.000125487	-0.0447731	0.0116756
rs57880697	chr2	120087814	A	G	0.30975	0.99956	0.000125574	1.44137	0.375887
rs7015677	chr8	126478758	A	G	0.99599	0.17612	0.000125585	-0.0446373	0.0116408
rs116283418	chr5	151379185	A	G	0.3033	8e-05	0.000125627	8.51196	2.21984
rs6891344	chr5	123136656	A	G	0.99979	0.1893	0.000125685	-0.0433703	0.0113109
rs56838313	chr7	87739954	G	T	0.97703	0.97046	0.000125724	-0.100217	0.026137
rs78059110	chr5	42851713	C	T	0.97105	0.98951	0.000125752	0.170371	0.0444341
rs180947907	chr2	200189960	A	G	0.51792	0.99671	0.000125791	0.402919	0.105086
rs16872830	chr5	42851063	G	T	0.97148	0.01048	0.000125868	-0.17036	0.0444339
rs193270421	chr16	10495503	G	T	0.65982	0.99521	0.000125928	0.302401	0.0788756
rs201656031	chr2	60105245	D	I	0.85456	0.00282	0.000125946	0.366471	0.0955879
rs187411880	chr7	117627111	A	G	0.53165	0.99473	0.000125969	0.316863	0.0826494
rs13040748	chr20	38869717	A	G	0.52513	0.01767	0.000125996	0.173697	0.0453073
rs137958993	chr6	112942945	A	C	0.82677	0.02026	0.000126179	0.132364	0.034529
rs72786246	chr5	119808496	A	G	0.74089	0.00123	0.000126361	0.711246	0.185556
rs138116328	chr7	135260835	A	G	0.73343	0.99979	0.000126412	-1.17175	0.305705
rs148664420	chr8	126483982	D	I	0.99995	0.82451	0.000126454	0.0446153	0.0116402
rs114272281	chr1	42131024	C	T	0.45171	0.99993	0.000126462	-2.42422	0.632483
rs75237449	chr6	22197042	C	T	0.8005	0.97071	0.000126652	0.110793	0.0289089
rs6070600	chr20	57362171	C	T	0.98862	0.81615	0.000126685	0.0437957	0.0114277
rs183507036	chr4	65268210	A	G	0.75379	0.00335	0.000126686	-0.32184	0.0839783
rs142811755	chr2	42892060	C	G	0.52894	0.99753	0.000126695	-0.448792	0.117105
rs10758274	chr9	34799294	C	T	0.99689	0.36252	0.000126717	0.0349922	0.00913072
rs115236688	chr1	42131179	C	T	0.45253	0.99993	0.000126911	-2.4218	0.631995
rs8050881	chr16	16037261	A	G	0.99864	0.72594	0.000127191	-0.0378706	0.00988415
rs145269708	chr2	65098374	A	G	0.52582	0.99012	0.000127213	0.236317	0.0616791
rs141208948	chr11	103483710	A	G	0.78481	0.01873	0.000127263	-0.141776	0.0370046
rs12544593	chr8	126483827	A	G	0.99997	0.82451	0.000127284	0.0445955	0.0116399
rs62120353	chr19	39093935	C	T	0.97092	0.12813	0.000127394	0.0508361	0.0132695
rs6726872	chr2	40722332	G	T	0.99846	0.54819	0.000127442	0.034026	0.00888184
rs28460839	chr7	144526158	A	G	0.98954	0.6424	0.000127664	0.0354278	0.0092488
rs199730564	chr18	56112360	D	I	0.92672	0.25197	0.000127669	0.0400924	0.0104666
rs189656244	chr5	65704161	C	T	0.88985	0.01345	0.000127763	-0.155015	0.0404702
rs111307548	chr9	13737234	G	T	0.85804	0.0102	0.00012781	-0.180302	0.0470731
rs170387	chr16	3292398	A	G	0.98655	0.55235	0.000127907	-0.0341463	0.00891534
rs199635614	chr5	123167679	D	I	0.99338	0.08496	0.000127947	0.060637	0.0158322
rs71576787	chr8	126483390	D	I	1.00002	0.17549	0.000128049	-0.0445769	0.0116395
rs78639213	chr5	42846192	D	I	0.9739	0.98954	0.000128105	0.170161	0.0444322
rs11684557	chr2	67107749	A	C	0.99068	0.05206	0.000128106	0.0759573	0.0198338
rs146778681	chr2	119068002	A	T	0.94592	0.98219	0.000128176	-0.131	0.0342078
rs143851829	chr7	135258357	C	G	0.73458	0.00021	0.000128193	1.17043	0.305634
rs147153249	chr14	79675406	C	T	0.77888	0.00491	0.000128197	-0.264399	0.0690425
rs201820992	chr2	36948866	D	I	0.52503	0.99347	0.000128201	-0.314105	0.0820225
rs60532086	chr7	87739905	A	G	0.97707	0.97048	0.000128416	-0.100143	0.0261533
rs12118034	chr1	176809368	C	T	0.99095	0.18323	0.000128571	0.0439913	0.0114896
rs7594373	chr2	67106831	C	T	0.99072	0.05206	0.000128762	0.0759312	0.0198335
rs201156456	chr18	56112359	D	I	0.92662	0.25195	0.000128799	0.040072	0.0104672
rs6898886	chr5	22770919	C	T	0.99745	0.49253	0.000128838	-0.0337523	0.00881658
rs17406109	chr8	126483140	C	T	1.00006	0.1755	0.000128892	-0.0445568	0.0116392
rs200055630	chr1	212443159	D	I	0.91282	0.00118	0.000129027	0.57502	0.150218
rs190683934	chr3	85787226	C	T	0.68625	0.00143	0.000129055	0.472023	0.123313
rs73359395	chr6	4561148	A	G	0.5606	0.99954	0.000129202	1.01914	0.266263
rs11687723	chr2	67109816	A	G	0.99005	0.05204	0.0001294	0.0759562	0.0198464
rs6874853	chr5	22770659	A	C	0.9978	0.49252	0.000129488	-0.0337355	0.00881505
rs114003186	chr1	54163628	A	G	0.70735	0.00462	0.000129601	-0.288551	0.0754023
rs707544	chr20	51283095	C	T	0.99825	0.89297	0.000129622	-0.0540646	0.0141279
rs11102781	chr1	114878522	C	T	0.8766	0.79366	0.000129646	-0.0452965	0.0118368
rs77698334	chr2	67105971	A	G	0.99077	0.94794	0.000129899	-0.0758861	0.019833
rs6440741	chr3	151134540	G	T	0.92123	0.77264	0.000129911	-0.0417665	0.0109158
rs11683809	chr2	67110169	G	T	0.98996	0.94796	0.000129941	-0.0759465	0.0198492
rs7188167	chr16	6947478	A	C	0.96982	0.75354	0.000129987	-0.0396793	0.0103707
rs75690075	chr3	111243040	A	G	0.24863	0.99991	0.000129999	-4.08172	1.06682
rs4740345	chr9	133426582	A	C	0.96512	0.81269	0.000130182	0.04384	0.0114593
rs117241632	chr6	83006584	A	G	0.72172	0.99535	0.000130386	-0.293091	0.0766184
rs2172047	chr5	171647053	A	G	0.99923	0.59418	0.000130462	0.0342221	0.00894651
rs192916868	chr7	104292430	G	T	0.7449	0.00214	0.000130511	0.415427	0.108606
rs78787104	chr2	67105401	A	G	0.99082	0.05206	0.000130621	0.0758575	0.0198326
rs116568168	chr12	15733276	A	G	0.5767	0.00083	0.000130854	0.820051	0.214423
rs111913768	chr3	111241637	C	T	0.24872	9e-05	0.000131015	4.09104	1.06979
rs62383085	chr5	154428636	A	T	0.9728	0.02294	0.000131055	0.113497	0.0296795
rs78131102	chr20	5525791	C	T	0.61274	0.97948	0.000131056	-0.150452	0.0393435
rs10466857	chr12	15729451	C	T	0.57728	0.99917	0.00013111	-0.818529	0.214052
rs11955287	chr5	22770557	G	T	0.99864	0.4925	0.000131184	-0.0336959	0.00881207
rs75750481	chr2	67111139	A	G	0.98988	0.05203	0.000131251	0.0759149	0.0198537
rs111949647	chr12	69435370	C	T	0.74519	0.259	0.000131359	0.0444386	0.0116225
rs75365528	chr2	67111153	C	T	0.98988	0.05203	0.000131392	0.0759114	0.0198542
rs184190783	chr7	15064706	C	T	0.57596	0.99866	0.000131477	-0.53627	0.140264
rs28521861	chr7	87746803	C	T	0.97316	0.02958	0.000131555	0.100041	0.0261673
rs187537117	chr7	15064708	A	T	0.57599	0.00134	0.000131652	0.536221	0.140264
rs116229133	chr7	8789260	A	G	0.75447	0.0095	0.00013178	0.197566	0.0516822
rs4753032	chr11	90613133	C	T	0.99397	0.57331	0.000131969	-0.0341979	0.0089468
rs190887106	chrX	86415687	A	C	0.44775	0.99738	0.0001321	-0.390708	0.102223
rs7704414	chr5	22764980	G	T	0.99696	0.49262	0.000132161	-0.0337123	0.00882059
rs6064706	chr20	57362819	A	C	0.98998	0.81642	0.000132361	0.0436992	0.0114347
rs112066652	chr6	168085637	A	G	0.30428	0.94546	0.000132431	0.0970559	0.0253994
rs113737643	chr19	12304554	A	T	0.96983	0.09846	0.000132433	-0.0565489	0.0147976
rs148902949	chr1	226106275	C	T	0.56723	0.01234	0.000132491	0.206252	0.053973
rs10461807	chr5	22767705	A	G	0.99798	0.50743	0.000132598	0.0336854	0.00881542
rs951139	chr14	40898249	C	G	0.9926	0.42227	0.000132609	-0.0339808	0.00889279
rs28943887	chr5	42631117	A	G	0.98466	0.01004	0.000132701	-0.172646	0.0451834
rs189371976	chr1	32728625	C	T	0.67652	0.00252	0.000132725	0.427282	0.111826
rs149905555	chr2	175794284	C	T	0.62964	0.98691	0.000132726	0.187542	0.0490825
rs7868514	chr9	34794176	C	G	0.99677	0.63782	0.000132805	-0.0349047	0.00913542
rs7705722	chr5	22765060	C	T	0.99687	0.49265	0.000132881	-0.0337022	0.00882102
rs139137791	chr5	4111226	A	G	0.39812	0.9992	0.000132908	0.847959	0.221943
rs77716669	chr7	87749197	A	G	0.97151	0.02959	0.000132971	0.100044	0.0261862
rs7716493	chr5	22767161	C	T	0.99687	0.49253	0.00013299	-0.0337003	0.00882101
rs17756537	chr14	95992431	C	T	0.90212	0.28305	0.00013303	-0.039116	0.0102388
rs2973009	chr5	42778798	A	G	0.99512	0.01011	0.000133098	-0.170602	0.0446572
rs2973004	chr5	42768825	C	T	0.99586	0.9899	0.000133128	0.17055	0.0446442
rs143028163	chr3	148446765	A	G	0.0718	2e-05	0.000133132	46.928	12.2842
rs34319505	chr5	42627306	G	T	0.973	0.99	0.000133144	0.174215	0.0456039
rs4879811	chr9	34639474	C	T	0.99118	0.50394	0.000133192	0.0337753	0.0088415
rs199603437	chr1	160870061	D	I	0.5025	0.99404	0.0001332	-0.300071	0.0785511
rs2973030	chr5	42749913	G	T	0.99586	0.01011	0.000133247	-0.170354	0.0445956
rs60285638	chr1	195512788	A	G	0.81535	0.0016	0.00013325	-0.477344	0.12496
rs11320307	chr8	126501337	D	I	0.99955	0.74533	0.000133276	0.0387749	0.0101507
rs73152596	chr22	25146648	G	T	0.97794	0.79965	0.000133402	0.0425366	0.0111361
rs2972991	chr5	42755646	A	C	0.99584	0.98989	0.000133492	0.170404	0.0446137
rs1372670	chr5	22768866	C	G	0.99855	0.49253	0.000133498	-0.0336593	0.00881243
rs34194895	chr5	42627392	A	T	0.97473	0.98999	0.0001335	0.173978	0.0455497
rs2972995	chr5	42757540	A	G	0.99589	0.9899	0.000133528	0.170423	0.0446197
rs10061041	chr5	22765416	A	G	0.99689	0.49263	0.000133544	-0.0336916	0.00882111
rs183315469	chr5	117301703	A	G	0.53694	0.00192	0.000133609	-0.487549	0.127654
rs7793564	chr7	144505513	A	C	0.98723	0.64903	0.000133704	0.0354867	0.00929181
rs7702313	chr5	22767183	C	T	0.99521	0.50684	0.000133779	0.0337112	0.00882724
rs117355481	chr11	46256228	A	G	0.61598	0.991	0.000133802	-0.239018	0.0625871
rs74320902	chr2	67104869	A	G	0.99096	0.05207	0.000133845	0.0757352	0.0198318
rs181223494	chr2	67112278	A	C	0.99	0.94797	0.000133934	-0.0758313	0.0198578
rs2926907	chr6	58491816	C	T	0.97292	0.30287	0.000133967	-0.0370092	0.00969169
rs1034536	chr14	90260956	C	T	0.99812	0.44128	0.000134064	0.0337866	0.0088482
rs67325258	chr7	126004027	D	I	0.68011	0.94834	0.000134081	0.0922396	0.0241563
rs190182951	chr11	71991733	C	T	0.89461	0.99191	0.000134158	-0.20257	0.0530523
rs148323933	chr17	96368	C	T	0.9318	0.01867	0.000134231	-0.130975	0.0343032
rs148921107	chr6	156182136	C	T	0.86675	0.00276	0.000134271	0.327467	0.0857671
rs13170938	chr5	122837204	C	T	0.99066	0.07188	0.000134327	0.0650735	0.0170439
rs71741017	chr1	221189480	D	I	0.99709	0.29297	0.000134393	0.0372274	0.00975082
rs4376673	chr1	3775454	C	G	0.9544	0.95046	0.000134502	-0.0800172	0.0209597
rs74156877	chr1	211214110	C	G	0.48219	0.99972	0.000134663	-1.60404	0.420195
rs112082646	chr17	100417	A	G	0.93516	0.9816	0.000134753	0.13166	0.034491
rs200854947	chr1	20588978	D	I	0.94331	0.6831	0.000134876	0.0374005	0.00979843
rs76447687	chr15	65137003	C	T	0.86127	0.02259	0.000134913	0.121761	0.0319002
rs188122851	chr2	146700860	A	T	0.95891	0.99506	0.000134986	-0.250437	0.0656146
rs7846135	chr8	126501528	A	G	0.99994	0.74535	0.000135109	0.0387356	0.0101493
rs10085847	chr7	42505017	C	T	0.98586	0.04806	0.000135127	-0.0801998	0.0210138
rs112338345	chr2	67104680	A	C	0.99103	0.05207	0.000135138	0.0756871	0.0198315
rs12404298	chr1	3719797	C	G	0.9362	0.9495	0.000135155	-0.0800161	0.020966
rs57882756	chr9	133426976	A	G	0.96477	0.81261	0.000135223	0.0437305	0.0114587
rs114518540	chr2	47735121	C	T	0.94006	0.00297	0.000135266	-0.30005	0.0786237
rs10063708	chr5	171694066	G	T	1.00003	0.67541	0.000135321	0.0357004	0.00935503
rs112951470	chr3	111241217	A	C	0.24882	0.99991	0.000135443	-4.09035	1.07191
rs62234004	chr22	49780796	C	T	0.9521	0.49455	0.000135526	-0.0340973	0.00893582
rs111613721	chr5	42743540	C	T	0.99676	0.01008	0.000135577	-0.17042	0.0446627
rs72787940	chr16	26557818	A	G	0.92932	0.07439	0.00013561	0.0652945	0.0171123
rs183923760	chr5	42744439	A	G	0.99668	0.01008	0.00013563	-0.170429	0.0446663
rs148827607	chr3	32436620	C	T	0.43981	0.00022	0.000135643	1.30954	0.343207
rs11952980	chr5	22770327	A	T	0.99942	0.50751	0.000135702	0.0336098	0.0088088
rs191425104	chr12	52738823	A	G	0.52647	0.00188	0.000135797	-0.525194	0.137654
rs143474610	chr3	111240638	C	T	0.24877	0.99991	0.000135817	-4.1008	1.07484
rs146771145	chr16	24839860	C	T	0.96115	0.00615	0.000135864	0.217114	0.056908
rs7976625	chr12	26696819	C	T	0.9935	0.05366	0.000135864	-0.0759791	0.0199149
rs11953047	chr5	22770504	A	T	0.9995	0.50751	0.000135911	0.0336052	0.00880847
rs1833658	chr5	123186681	C	T	0.9879	0.08597	0.000135926	0.0603033	0.0158066
rs183337166	chr4	92244390	C	G	0.79225	0.99632	0.000136005	0.303759	0.0796239
rs11955763	chr5	22773577	C	T	0.98382	0.50549	0.000136067	0.0338546	0.0088745
rs11953049	chr5	22770519	G	T	0.99957	0.50752	0.000136078	0.0336014	0.00880818
rs142510915	chr4	183804962	G	T	0.62192	0.99745	0.000136143	-0.429815	0.112674
rs12420377	chr11	90630937	A	C	0.99751	0.45205	0.000136189	0.0338899	0.00888428
rs280338	chr6	50576852	C	T	0.97912	0.10771	0.00013622	0.0552196	0.0144761
rs116529908	chr2	67104161	C	T	0.99109	0.05207	0.000136229	0.0756464	0.0198312
rs230809	chr5	42795893	A	G	0.99757	0.98992	0.000136329	0.170377	0.0446674
rs138716036	chrX	152369458	A	C	0.50397	0.97742	0.000136342	-0.130851	0.0343053
rs332905	chr2	117859720	A	G	0.99461	0.21711	0.000136478	-0.0404216	0.010598
rs57641771	chr6	166360048	D	I	0.98229	0.95389	0.000136542	-0.0799002	0.0209494
rs12448018	chr16	53410708	C	G	0.99142	0.74048	0.000136669	0.0385457	0.0101071
rs12590942	chr14	98181498	A	C	0.96254	0.22477	0.000136682	-0.0407942	0.0106968
rs17150778	chr5	123141745	C	T	0.99785	0.81086	0.000136745	0.0431849	0.0113239
rs149863144	chr17	38526455	A	G	0.77486	0.96998	0.000136815	-0.110255	0.028912
rs181540121	chr7	11147729	A	G	0.60251	0.0089	0.000136951	0.226068	0.0592854
rs200166915	chr19	39093293	D	I	0.95079	0.12544	0.000136986	0.0514301	0.0134876
rs148147055	chr12	74320097	A	T	0.82841	0.97176	0.000137	-0.110371	0.028945
rs4799194	chr18	76473029	A	G	0.98699	0.09331	0.000137005	0.0572783	0.0150214
rs74396243	chr12	26999743	G	T	0.51293	0.01298	0.000137128	0.198622	0.0520922
rs182500339	chr10	24776012	G	T	0.80576	0.02777	0.000137192	-0.113818	0.0298518
rs10569610	chr5	42800129	D	I	0.9983	0.98992	0.000137197	0.170307	0.0446674
rs144459026	chr20	41798216	A	G	0.45392	0.00081	0.000137332	0.946479	0.248255
rs6699378	chr1	176895031	A	T	0.97704	0.57768	0.000137359	-0.0342395	0.0089809
rs188749230	chr4	16450678	A	G	0.86888	0.00472	0.00013748	0.265832	0.0697307
[truncated: 8,012 more rows]

## Sheet: F3.2.rg.SS
Figure 3-2. Genetic correlations between UPPSP Sensation Seeking and several traits: neuropsychiatric, smoking, personality, cognition, anthropomorphic.
Phenotype	Sample Size	Reference	PMID	Genetic correlation (rg)	Standard error	Z score	P value	h2_obs	h2_obs_SE	h2_intercept	h2_interc_SE	gcov	gcov_SE	FDR < 0.05
AUDIT total score	141932	Sanchez-Roige et al 2018	https://doi.org/10.1101/275917	0.441	0.1008	4.3754	1.2118e-05	0.0802	0.0215	1.007	0.007	-0.0137	0.0055	Yes
AUDIT-P	121604	Sanchez-Roige et al 2018	https://doi.org/10.1101/275917	0.52	0.1205	4.3156	1.592e-05	0.0802	0.0215	1.007	0.007	-0.0197	0.0054	Yes
AUDIT-C	121604	Sanchez-Roige et al 2018	https://doi.org/10.1101/275917	0.4035	0.1013	3.9832	6.7995e-05	0.0802	0.0215	1.007	0.007	-0.0105	0.0053	Yes
Extraversion	63,030	van den Berg et al, 2016	26362575	0.5332	0.1704	3.128	0.001757	0.01928	0.003275	1.005	0.00693	0.002509	0.005299	Yes
Neuroticism Smith	106716	Smith et al, 2016	27067015	-0.3036	0.09764	-3.109	0.001874	0.1261	0.009513	0.9895	0.01035	0.006526	0.006095	Yes
Alcohol consumption UKBB	112117	Clarke et al 2017	28937693	0.3035	0.1013	2.9972	0.0027	0.0809	0.0059	1.0092	0.0076	-0.0088	0.0053	Yes
Years of Education	293723	Okbay et al, 2016a	27225129	0.1583	0.05811	2.725	0.006431	0.1247	0.004518	0.9354	0.01075	-0.004364	0.005187	Yes
Neuroticism	170911	Okbay et al, 2016b	27089181	-0.2587	0.1008	-2.567	0.01024	0.09053	0.008003	0.9845	0.01342	-0.002226	0.006022	No
ADHD	53293	Demontis et al, 2017	https://doi.org/10.1101/145581	0.2488	0.09719	2.56	0.01048	0.239	0.01582	1.031	0.01076	-0.001855	0.006103	No
Cognitive performance	106736	Rietveld et al, 2014	25201988	0.2029	0.09435	2.151	0.03148	0.108	0.007864	1.024	0.009673	0.0008332	0.005904	No
Depressive Symptoms	161460	Okbay et al, 2016b	27089181	-0.244	0.1184	-2.061	0.03933	0.04697	0.00393	1.001	0.007741	0.003526	0.005572	No
College attainment	95427	Rietveld et al, 2013	23722424	0.1816	0.1031	1.762	0.07814	0.1062	0.007555	1.019	0.008395	-0.001319	0.005908	No
UPPSP Premeditation	22774	Current ms	0	0.4274	0.2429	1.7597	0.0785	0.0451	0.0199	1.0035	0.0063	0.1176	0.0048	No
Bipolar Disorder	16731	Sklar et al, 2011	21926972	0.2706	0.1609	1.682	0.0926	0.5027	0.05102	1.005	0.009661	-0.00384	0.006903	No
Drug Experimentation	22572	Current ms	0	0.3015	0.18	1.675	0.09384	0.1116	0.02421	0.9973	0.007302	0.1491	0.005809	No
UPPSP Positive Urgency	22738	Current ms	0	0.2974	0.1848	1.6093	0.1075	0.0682	0.0232	1.0037	0.0067	0.2003	0.0047	No
Smoking Lifetime Use	74035	Furberg et al, 2010	20418890	0.1784	0.1112	1.604	0.1087	0.07277	0.00655	0.9999	0.006245	0.0006863	0.004586	No
Autism spectrum disorder	10263	ASD PGC Working group	https://www.med.unc.edu/pgc/results-and-downloads	0.2144	0.136	1.577	0.1149	0.4357	0.05131	0.9691	0.007624	-0.01421	0.005343	No
Anorexia Nervosa	17767	Boraska et al 2014	24514567	-0.2187	0.1414	-1.5466	0.122	0.0789	0.0222	1.0076	0.0071	0.0068	0.0053	No
Major Depressive Disorder	18759	Ripke et al, 2013	22472876	-0.3209	0.217	-1.479	0.1392	0.1494	0.02899	1.016	0.008483	0.005998	0.006333	No
Height	253288	Wood et al, 2014	25282103	-0.07897	0.06086	-1.297	0.1945	0.3396	0.01776	1.238	0.03659	0.005988	0.007583	No
BIS Motor subscale	21806	Current ms	0	0.2989	0.2367	1.263	0.2067	0.04426	0.01931	1.002	0.006466	0.2101	0.004909	No
Intracranial brain volume	13171	Hibar et al, 2015	25607358	0.2163	0.1802	1.2	0.2301	0.1777	0.04612	1.002	0.007026	-0.002547	0.005068	No
Nucleus Accumbens Volume	13171	Hibar et al, 2015	25607358	0.3008	0.263	1.144	0.2528	0.08274	0.03534	0.9812	0.006673	-0.004413	0.005144	No
BIS Total score	21495	Current ms	0	0.2297	0.2022	1.136	0.2559	0.06531	0.02323	1.008	0.006932	0.09659	0.004571	No
Cannabis lifetime use	32330	Stringer et al, 2016	27023175	0.1862	0.1673	1.113	0.2658	0.08961	0.01554	0.9996	0.006642	-0.001795	0.005043	No
BIS Attentional Subscale	21876	Current ms	0	0.218	0.2139	1.019	0.308	0.05398	0.02238	1.012	0.006936	0.05117	0.00459	No
Smoking Age Onset	47961	Furberg et al, 2010	20418890	-0.2318	0.228	-1.017	0.3094	0.03036	0.009272	1	0.006512	0.001789	0.004592	No
Alcohol Dependence	7280	Gelernter et al 2014	24166409	-0.3551	0.361	-0.9835	0.3254	0.08026	0.06717	1.049	0.007089	0.01023	0.004822	No
Childhood IQ	12441	Benyamin et al, 2014	23358156	0.1543	0.1686	0.9152	0.3601	0.2798	0.04497	1	0.009366	-0.001098	0.005642	No
Schizophrenia	77096	Ripke et al, 2014	25056061	-0.0425	0.07002	-0.607	0.5439	0.4725	0.01978	1.039	0.01347	0.003996	0.006631	No
Alcohol dependence PGC	52848	Walters et al 2018	biorXiv	-0.0971	0.1665	-0.5833	0.5597	0.0557	0.0119	1.0195	0.0064	0.0009	0.0044	No
Obesity	98697	Berndt et al, 2013	23563607	0.03835	0.08002	0.4793	0.6317	0.1705	0.009272	0.7978	0.008844	-0.005642	0.005516	No
Former smoker	70675	Furberg et al, 2010	20418890	-0.08117	0.1732	-0.4686	0.6394	0.03544	0.006286	1.003	0.006437	-0.0001061	0.004853	No
Childhood Obesity	13848	Bradfield et al, 2012	22484627	-0.04714	0.1013	-0.4651	0.6418	0.4275	0.0437	0.9179	0.007643	3.777e-05	0.004535	No
Hippocampus Volume	13171	Hibar et al, 2015	25607358	-0.09219	0.2064	-0.4466	0.6552	0.149	0.04159	0.9857	0.006932	0.002254	0.005236	No
BIS Nonplanning subscale	21786	Current ms	0	0.09337	0.2395	0.3899	0.6966	0.06566	0.02535	1.008	0.007344	0.004613	0.005	No
Alcohol consumption	70460	Schumann et al 2016	27911795	-0.111	0.2942	-0.3771	0.7061	0.04647	0.01245	1.014	0.0128	0.009562	0.007933	No
Caudate Volume	13171	Hibar et al, 2015	25607358	-0.04799	0.1446	-0.3318	0.74	0.253	0.0359	0.9676	0.00622	0.001129	0.005189	No
BMI	339224	Locke et al, 2015	25673413	0.01835	0.07378	0.2487	0.8036	0.144	0.007227	0.766	0.00849	-0.006415	0.004757	No
UPPSP Negative Urgency	22795	Current ms	0	-0.0336	0.2076	-0.162	0.8713	0.0796	0.0235	1.0065	0.0067	0.0206	0.0049	No
Delay discounting	23127	Sanchez-Roige et al 2017	29230059	0.01416	0.1995	0.071	0.9434	0.07275	0.01878	1.013	0.006722	0.001196	0.00474	No
UPPSP Perseverance	22861	Current ms	0	0.0107	0.1746	0.06126	0.9512	0.08108	0.02108	1.006	0.006696	-0.03634	0.004458	No
Subjective Wellbeing	298420	Okbay et al, 2016b	27089181	0.005774	0.1085	0.05322	0.9576	0.02467	0.002109	1.004	0.008003	0.01276	0.005363	No
Daily cigarettes	68028	Furberg et al, 2010	20418890	0.0005982	0.1525	0.003922	0.9969	0.03463	0.008815	1.004	0.00676	-0.006188	0.004586	No

## Sheet: F3.3.rg.Prem
Figure 3-3. Genetic correlations between UPPSP Premeditation and several traits: neuropsychiatric, smoking, personality, cognition, anthropomorphic.
Phenotype	Sample Size	Reference	PMID	Genetic correlation (rg)	Standard error	Z score	P value	h2_obs	h2_obs_SE	h2_intercept	h2_interc_SE	gcov	gcov_SE	FDR < 0.05
BIS Total score	21495	Current ms	0	0.8347	0.1686	4.95	7.436e-07	0.06531	0.02323	1.008	0.006932	0.5538	0.005502	Yes
BIS Attentional Subscale	21876	Current ms	0	0.8237	0.2194	3.755	0.0001733	0.05399	0.02238	1.012	0.006934	0.333	0.004767	Yes
UPPSP Positive Urgency	22738	Current ms	0	0.6185	0.2015	3.069	0.0021	0.0682	0.0232	1.0037	0.0067	0.3832	0.0049	Yes
ADHD	53293	Demontis et al, 2017	https://doi.org/10.1101/145581	0.4369	0.1461	2.99	0.002793	0.239	0.01579	1.031	0.01075	-0.006242	0.006117	Yes
AUDIT total score	141958	Sanchez-Roige et al 2018	https://doi.org/10.1101/275917	0.4906	0.1659	2.9568	0.0031085	0.0423	0.0208	1.0048	0.0067	-0.003	0.0053	Yes
BIS Nonplanning subscale	21786	Current ms	0	0.6005	0.2032	2.955	0.003123	0.06566	0.02535	1.008	0.007344	0.5667	0.00563	Yes
AUDIT-P	121604	Sanchez-Roige et al 2018	https://doi.org/10.1101/275917	0.5947	0.2041	2.9132	0.0035778	0.0423	0.0208	1.0048	0.0067	-0.0005	0.0059	Yes
BIS Motor subscale	21806	Current ms	0	0.7377	0.2633	2.802	0.005074	0.04426	0.01931	1.002	0.006466	0.4258	0.005154	Yes
AUDIT-C	121604	Sanchez-Roige et al 2018	https://doi.org/10.1101/275917	0.443	0.159	2.7867	0.0053255	0.0423	0.0208	1.0048	0.0067	-0.0036	0.005	Yes
Alcohol consumption UKBB	112117	Clarke et al 2017	28937693	0.4399	0.1626	2.7055	0.0068	0.081	0.0059	1.0091	0.0076	-0.0075	0.0053	Yes
Smoking Lifetime Use	74035	Furberg et al, 2010	20418890	0.4689	0.1773	2.645	0.008171	0.07283	0.006543	0.9998	0.006231	-0.002629	0.005007	Yes
Cannabis lifetime use	32330	Stringer et al, 2016	27023175	0.6716	0.2597	2.586	0.009713	0.08942	0.01555	0.9997	0.006624	-0.005922	0.005021	Yes
Alcohol dependence PGC	52848	Walters et al 2018	biorXiv	0.6934	0.2776	2.498	0.0125	0.0557	0.0119	1.0195	0.0064	-0.0057	0.0049	Yes
UPPSP Perseverance	22861	Current ms	0	0.4834	0.2086	2.317	0.02052	0.0452	0.01989	1.003	0.006315	0.3857	0.005463	No
Drug Experimentation	22572	Current ms	0	0.4805	0.228	2.107	0.03512	0.1116	0.02421	0.9973	0.007302	0.1722	0.005029	No
UPPSP Sensation Seeking	22774	Current ms	0	0.4274	0.2429	1.7597	0.0785	0.0451	0.0199	1.0035	0.0063	0.1176	0.0048	No
Intracranial brain volume	13171	Hibar et al, 2015	25607358	0.4275	0.2566	1.666	0.09576	0.1778	0.04612	1.002	0.007024	-0.005283	0.005027	No
Major Depressive Disorder	18759	Ripke et al, 2013	22472876	0.474	0.2973	1.594	0.1109	0.1494	0.02897	1.016	0.008475	-0.007063	0.006592	No
Alcohol consumption	70460	Schumann et al 2016	27911795	0.4379	0.3019	1.451	0.1469	0.04653	0.01245	1.014	0.0128	-0.0008135	0.007857	No
Nucleus Accumbens Volume	13171	Hibar et al, 2015	25607358	0.4583	0.3352	1.367	0.1716	0.08269	0.03532	0.9813	0.006669	-0.003192	0.004507	No
Delay discounting	23127	Sanchez-Roige et al 2017	29230059	0.3331	0.2502	1.331	0.1831	0.07275	0.01878	1.013	0.006722	0.1049	0.005403	No
BMI	339224	Locke et al, 2015	25673413	0.1221	0.09762	1.251	0.2108	0.144	0.007227	0.766	0.008489	-0.0004438	0.004794	No
Years of Education	293723	Okbay et al, 2016a	27225129	0.1061	0.09169	1.157	0.2471	0.1247	0.004513	0.9353	0.01073	-0.01062	0.005836	No
Former smoker	70675	Furberg et al, 2010	20418890	-0.2349	0.2045	-1.149	0.2507	0.03535	0.006295	1.003	0.006458	0.0001628	0.004535	No
Autism spectrum disorder	10263	ASD PGC Working group	https://www.med.unc.edu/pgc/results-and-downloads	0.2004	0.1808	1.108	0.2676	0.4357	0.05132	0.9691	0.007626	-0.003648	0.004836	No
College attainment	95427	Rietveld et al, 2013	23722424	0.1494	0.1385	1.079	0.2808	0.1062	0.007555	1.019	0.008395	-0.008994	0.006016	No
Daily cigarettes	68028	Furberg et al, 2010	20418890	0.2406	0.2305	1.044	0.2966	0.03463	0.008811	1.003	0.006748	-0.002937	0.004728	No
Depressive Symptoms	161460	Okbay et al, 2016b	27089181	0.128	0.1271	1.007	0.3139	0.04687	0.003932	1.001	0.007765	-0.0004844	0.004673	No
Extraversion	63,030	van den Berg et al, 2016	26362575	0.2183	0.2179	1.001	0.3166	0.01924	0.003272	1.005	0.006925	0.0001787	0.00507	No
Bipolar Disorder	16731	Sklar et al, 2011	21926972	-0.153	0.1934	-0.7912	0.4288	0.5022	0.051	1.005	0.009661	0.007338	0.007014	No
Smoking Age Onset	47961	Furberg et al, 2010	20418890	0.1768	0.2534	0.6979	0.4852	0.03021	0.009275	1	0.006518	-0.009345	0.004405	No
Cognitive performance	106736	Rietveld et al, 2014	25201988	0.07902	0.1245	0.6345	0.5258	0.108	0.007864	1.024	0.009673	-0.003164	0.005791	No
Neuroticism Smith	106716	Smith et al, 2016	27067015	-0.07314	0.118	-0.6199	0.5353	0.1262	0.009506	0.9894	0.01033	0.00636	0.005654	No
Subjective Wellbeing	298420	Okbay et al, 2016b	27089181	-0.08456	0.1366	-0.6188	0.536	0.02466	0.00211	1.004	0.008001	-0.0009926	0.005294	No
Neuroticism	170911	Okbay et al, 2016b	27089181	0.06234	0.1058	0.5893	0.5557	0.09056	0.008002	0.9844	0.0134	-0.0003978	0.005617	No
Anorexia Nervosa	17767	Boraska et al 2014	24514567	-0.1122	0.1927	-0.5822	0.5604	0.043	0.0215	1.0048	0.0071	0.0003	0.0047	No
Schizophrenia	77096	Ripke et al, 2014	25056061	-0.0397	0.08719	-0.4553	0.6489	0.4725	0.01978	1.039	0.01347	0.001739	0.006164	No
Childhood Obesity	13848	Bradfield et al, 2012	22484627	0.05675	0.1302	0.436	0.6628	0.4276	0.04369	0.9178	0.007643	-0.001658	0.004232	No
Obesity	98697	Berndt et al, 2013	23563607	0.04055	0.09528	0.4256	0.6704	0.1705	0.009271	0.7978	0.008844	0.001278	0.004658	No
Height	253288	Wood et al, 2014	25282103	-0.01621	0.07852	-0.2065	0.8364	0.3396	0.01777	1.238	0.0366	-0.001613	0.007606	No
Childhood IQ	12441	Benyamin et al, 2014	23358156	0.04126	0.2219	0.1859	0.8525	0.2798	0.04497	1	0.009366	-0.003134	0.005775	No
Caudate Volume	13171	Hibar et al, 2015	25607358	-0.03481	0.1877	-0.1854	0.8529	0.2529	0.03588	0.9676	0.006217	0.001005	0.004957	No
Hippocampus Volume	13171	Hibar et al, 2015	25607358	0.04106	0.2319	0.1771	0.8595	0.149	0.0416	0.9857	0.006933	0.000207	0.004962	No
UPPSP Negative Urgency	22795	Current ms	0	0.011	0.2277	0.0485	0.9613	0.0796	0.0235	1.0065	0.0067	0.3032	0.0045	No
Alcohol Dependence	7280	Gelernter et al 2014	24166409	-0.004795	0.4464	-0.01074	0.9914	0.08062	0.0671	1.049	0.007067	-0.0008514	0.004526	No

## Sheet: F3.4.rg.PU
Figure 3-4. Genetic correlations between UPPSP Positive Urgency and several traits: neuropsychiatric, smoking, personality, cognition, anthropomorphic.
Phenotype	Sample Size	Reference	PMID	Genetic correlation (rg)	Standard error	Z score	P value	h2_obs	h2_obs_SE	h2_intercept	h2_interc_SE	gcov	gcov_SE	FDR < 0.05
UPPSP Negative Urgency	22795	Current ms	0	0.7387	0.1224	6.0338	1.6014e-09	0.0796	0.0235	1.0065	0.0067	0.6053	0.0057	Yes
Neuroticism	170911	Okbay et al, 2016b	27089181	0.4593	0.1107	4.15	3.33e-05	0.09053	0.008003	0.9845	0.01342	-0.0044	0.005758	Yes
AUDIT-P	121604	Sanchez-Roige et al 2018	https://doi.org/10.1101/275917	0.4018	0.1173	3.4245	0.00061599	0.0709	0.0246	1.0024	0.0071	0.0029	0.0056	Yes
Smoking Lifetime Use	74035	Furberg et al, 2010	20418890	0.5083	0.15	3.39	0.0006999	0.07277	0.00655	0.9999	0.006245	-0.005354	0.004751	Yes
AUDIT total score	141958	Sanchez-Roige et al 2018	https://doi.org/10.1101/275917	0.3105	0.1009	3.0768	0.002092	0.0709	0.0246	1.0024	0.0071	-0.0042	0.0052	Yes
UPPSP Premeditation	22795	Current ms	0	0.6185	0.2015	3.069	0.0021	0.0682	0.0232	1.0037	0.0067	0.3832	0.0049	Yes
BIS Total score	21495	Current ms	0	0.5404	0.1759	3.071	0.00213	0.06531	0.02323	1.008	0.006932	0.492	0.005178	Yes
Neuroticism Smith	106716	Smith et al, 2016	27067015	0.3008	0.1112	2.705	0.006832	0.1261	0.009513	0.9895	0.01035	0.002639	0.005606	Yes
Depressive Symptoms	161460	Okbay et al, 2016b	27089181	0.3035	0.1143	2.656	0.0079	0.04697	0.00393	1.001	0.007741	0.00037	0.005331	Yes
BIS Attentional Subscale	21876	Current ms	0	0.5523	0.2083	2.651	0.008019	0.05398	0.02238	1.012	0.006936	0.3913	0.00498	Yes
Alcohol consumption UKBB	112117	Clarke et al 2017	28937693	0.305	0.116	2.6297	0.0085	0.0809	0.0059	1.0092	0.0076	-0.0017	0.0049	Yes
ADHD	53293	Demontis et al, 2017	https://doi.org/10.1101/145581	0.3017	0.115	2.624	0.008691	0.239	0.01582	1.031	0.01076	0.001248	0.006348	Yes
Drug Experimentation	22572	Current ms	0	0.4652	0.1819	2.558	0.01052	0.1116	0.02421	0.9973	0.007302	0.1631	0.004985	Yes
AUDIT-C	121604	Sanchez-Roige et al 2018	https://doi.org/10.1101/275917	0.2566	0.1037	2.4743	0.013351	0.0709	0.0246	1.0024	0.0071	-0.0051	0.0049	Yes
Subjective Wellbeing	298420	Okbay et al, 2016b	27089181	-0.3054	0.1344	-2.272	0.02306	0.02467	0.002109	1.004	0.008003	0.002846	0.005934	No
Former smoker	70675	Furberg et al, 2010	20418890	-0.4179	0.1916	-2.181	0.02917	0.03544	0.006286	1.003	0.006437	-0.0003779	0.004768	No
Cognitive performance	106736	Rietveld et al, 2014	25201988	-0.2242	0.1029	-2.179	0.02931	0.108	0.007864	1.024	0.009673	0.002883	0.005751	No
Alcohol dependence PGC	52848	Walters et al 2018	biorXiv	0.4262	0.1992	2.1396	0.0324	0.0557	0.0119	1.0195	0.0064	0.0012	0.0048	No
BIS Nonplanning subscale	21786	Current ms	0	0.4549	0.2306	1.972	0.04859	0.06566	0.02535	1.008	0.007344	0.416	0.00537	No
Height	253288	Wood et al, 2014	25282103	-0.1195	0.06093	-1.962	0.0498	0.3404	0.01758	1.232	0.03486	0.001762	0.007232	No
BIS Motor subscale	21806	Current ms	0	0.4178	0.2292	1.823	0.06833	0.04426	0.01931	1.002	0.006466	0.3907	0.005013	No
Daily cigarettes	68028	Furberg et al, 2010	20418890	0.3866	0.2161	1.789	0.07357	0.03463	0.008815	1.004	0.00676	-0.009109	0.005345	No
Childhood Obesity	13848	Bradfield et al, 2012	22484627	0.2043	0.1197	1.707	0.08778	0.4275	0.0437	0.9179	0.007643	-0.005599	0.004833	No
Autism spectrum disorder	10263	ASD PGC Working group	https://www.med.unc.edu/pgc/results-and-downloads	0.2386	0.1429	1.67	0.09496	0.4357	0.05131	0.9691	0.007624	-0.004137	0.004778	No
Anorexia Nervosa	17767	Boraska et al 2014	24514567	-0.2726	0.1658	-1.6444	0.1001	0.0693	0.0249	1.0041	0.0076	0.0067	0.0053	No
UPPSP Sensation Seeking	22774	Current ms	0	0.2974	0.1848	1.6093	0.1075	0.0682	0.0232	1.0037	0.0067	0.2003	0.0047	No
Years of Education	293723	Okbay et al, 2016a	27225129	-0.09779	0.0648	-1.509	0.1313	0.1247	0.004518	0.9354	0.01075	-0.007029	0.005595	No
College attainment	95427	Rietveld et al, 2013	23722424	-0.1484	0.1037	-1.432	0.1523	0.1062	0.007555	1.019	0.008395	0.002135	0.005685	No
Hippocampus Volume	13171	Hibar et al, 2015	25607358	-0.2733	0.2171	-1.259	0.2081	0.149	0.04159	0.9857	0.006932	0.006726	0.004866	No
Major Depressive Disorder	18759	Ripke et al, 2013	22472876	0.233	0.1881	1.238	0.2156	0.1494	0.02899	1.016	0.008483	0.00314	0.005723	No
BMI	339224	Locke et al, 2015	25673413	0.09455	0.0814	1.162	0.2454	0.144	0.007227	0.766	0.00849	0.003343	0.004868	No
Delay discounting	23127	Sanchez-Roige et al 2017	29230059	0.1905	0.2095	0.9094	0.3631	0.07275	0.01878	1.013	0.006722	0.1057	0.004927	No
Cannabis lifetime use	32330	Stringer et al, 2016	27023175	0.1513	0.1672	0.9046	0.3657	0.08961	0.01554	0.9996	0.006642	0.0007129	0.005416	No
Extraversion	63,030	van den Berg et al, 2016	26362575	0.1405	0.1602	0.8771	0.3804	0.01928	0.003275	1.005	0.00693	-0.004087	0.004971	No
Alcohol Dependence	7280	Gelernter et al 2014	24166409	-0.314	0.3909	-0.8032	0.4219	0.08026	0.06717	1.049	0.007089	0.008464	0.005536	No
Smoking Age Onset	47961	Furberg et al, 2010	20418890	-0.2065	0.2587	-0.7983	0.4247	0.03036	0.009272	1	0.006512	-0.002417	0.004528	No
Childhood IQ	12441	Benyamin et al, 2014	23358156	0.1095	0.1542	0.7097	0.4779	0.2798	0.04497	1	0.009366	-0.005037	0.005773	No
Obesity	98697	Berndt et al, 2013	23563607	0.05837	0.08411	0.6939	0.4877	0.1705	0.009272	0.7978	0.008844	0.006087	0.005595	No
Caudate Volume	13171	Hibar et al, 2015	25607358	0.08877	0.1493	0.5944	0.5522	0.253	0.0359	0.9676	0.00622	-0.005293	0.004645	No
Schizophrenia	77096	Ripke et al, 2014	25056061	0.04374	0.07407	0.5905	0.5549	0.4725	0.01978	1.039	0.01347	0.002798	0.006696	No
Nucleus Accumbens Volume	13171	Hibar et al, 2015	25607358	0.1367	0.2786	0.4908	0.6236	0.08274	0.03534	0.9812	0.006673	-3.97e-05	0.004767	No
Bipolar Disorder	16731	Sklar et al, 2011	21926972	0.06571	0.1494	0.4397	0.6602	0.5027	0.05102	1.005	0.009661	0.0001027	0.006858	No
UPPSP Perseverance	22861	Current ms	0	-0.07554	0.2113	-0.3576	0.7207	0.06818	0.02323	1.004	0.006723	0.121	0.004707	No
Alcohol consumption	70460	Schumann et al 2016	27911795	0.1475	0.424	0.348	0.7279	0.04647	0.01245	1.014	0.0128	0.003135	0.00772	No
Intracranial brain volume	13171	Hibar et al, 2015	25607358	0.04158	0.1926	0.2159	0.8291	0.1777	0.04612	1.002	0.007026	-0.001053	0.004894	No

## Sheet: F3.5.rg.NU
Figure 3-5. Genetic correlations between UPPSP Negative Urgency and several traits: neuropsychiatric, smoking, personality, cognition, anthropomorphic.
Phenotype	Sample Size	Reference	PMID	Genetic correlation (rg)	Standard error	Z score	P value	h2_obs	h2_obs_SE	h2_intercept	h2_interc_SE	gcov	gcov_SE	FDR < 0.05
UPPSP Positive Urgency	22738	Current ms	0	0.7387	0.1224	6.0338	1.6014e-09	0.0796	0.0235	1.0065	0.0067	0.6053	0.0057	Yes
Neuroticism Smith	106716	Smith et al, 2016	27067015	0.7283	0.1238	5.881	4.088e-09	0.09053	0.008003	0.9845	0.01342	-0.003663	0.0074	Yes
Neuroticism	170911	Okbay et al, 2016b	27089181	0.6011	0.1107	5.432	5.579e-08	0.1261	0.009513	0.9895	0.01035	0.0006011	0.005927	Yes
Depressive Symptoms	161460	Okbay et al, 2016b	27089181	0.4474	0.1189	3.762	0.0001689	0.04697	0.00393	1.001	0.007741	0.00411	0.005764	Yes
Subjective Wellbeing	298420	Okbay et al, 2016b	27089181	-0.4825	0.1301	-3.71	0.0002072	0.02467	0.002109	1.004	0.008003	-0.002512	0.006175	Yes
BIS Attentional Subscale	21876	Current ms	0	0.6462	0.1915	3.374	0.0007416	0.05398	0.02238	1.012	0.006936	0.3948	0.005133	Yes
Cognitive performance	106736	Rietveld et al, 2014	25201988	-0.2934	0.0923	-3.178	0.001481	0.108	0.007864	1.024	0.009673	0.004617	0.006203	Yes
AUDIT-P	121604	Sanchez-Roige et al 2018	https://doi.org/10.1101/275917	0.337	0.1144	2.9461	0.0032182	0.0799	0.0231	1.0061	0.0068	0.0073	0.0053	Yes
Smoking Lifetime Use	74035	Furberg et al, 2010	20418890	0.3382	0.1229	2.751	0.005943	0.07277	0.00655	0.9999	0.006245	-0.003614	0.004704	Yes
College attainment	95427	Rietveld et al, 2013	23722424	-0.25	0.1003	-2.492	0.0127	0.1062	0.007555	1.019	0.008395	0.002489	0.006053	No
BIS Total score	21495	Current ms	0	0.4585	0.2078	2.207	0.02733	0.06531	0.02323	1.008	0.006932	0.4623	0.005027	No
AUDIT total score	141958	Sanchez-Roige et al 2018	https://doi.org/10.1101/275917	0.2032	0.0946	2.1476	0.031746	0.0799	0.0231	1.0061	0.0068	0.0003	0.005	No
Autism spectrum disorder	10263	ASD PGC Working group	https://www.med.unc.edu/pgc/results-and-downloads	0.2264	0.1267	1.787	0.07389	0.4357	0.05131	0.9691	0.007624	-0.001518	0.005217	No
Extraversion	63,030	van den Berg et al, 2016	26362575	-0.2938	0.1649	-1.782	0.07483	0.01928	0.003275	1.005	0.00693	0.004303	0.005537	No
Drug Experimentation	22572	Current ms	0	0.2718	0.1615	1.683	0.09234	0.1116	0.02421	0.9973	0.007302	0.1425	0.004863	No
Alcohol consumption UKBB	112117	Clarke et al 2017	28937693	0.1796	0.107	1.6778	0.0934	0.0809	0.0059	1.0092	0.0076	-0.0034	0.005	No
ADHD	53293	Demontis et al, 2017	https://doi.org/10.1101/145581	0.1877	0.1119	1.678	0.09342	0.239	0.01582	1.031	0.01076	-0.0002747	0.006534	No
Years of Education	293723	Okbay et al, 2016a	27225129	-0.1147	0.06862	-1.671	0.09474	0.1247	0.004518	0.9354	0.01075	-0.01068	0.00578	No
Height	253288	Wood et al, 2014	25282103	-0.09672	0.06418	-1.507	0.1318	0.3404	0.01758	1.232	0.03486	0.0002468	0.007855	No
Alcohol dependence PGC	52848	Walters et al 2018	biorXiv	0.2575	0.1843	1.3976	0.1622	0.0557	0.0119	1.0195	0.0064	0.0022	0.005	No
Anorexia Nervosa	17767	Boraska et al 2014	24514567	-0.2345	0.1701	-1.3791	0.1679	0.1908	0.0303	1.011	0.0081	0.0048	0.0053	No
Daily cigarettes	68028	Furberg et al, 2010	20418890	0.2492	0.1837	1.357	0.1749	0.03463	0.008815	1.004	0.00676	-0.002616	0.005223	No
AUDIT-C	121604	Sanchez-Roige et al 2018	https://doi.org/10.1101/275917	0.1257	0.0947	1.3272	0.18445	0.0799	0.0231	1.0061	0.0068	-0.0005	0.0049	No
Delay discounting	23127	Sanchez-Roige et al 2017	29230059	0.2061	0.1935	1.065	0.2868	0.07275	0.01878	1.013	0.006722	0.09047	0.00544	No
Cannabis lifetime use	32330	Stringer et al, 2016	27023175	0.1584	0.1554	1.019	0.308	0.08961	0.01554	0.9996	0.006642	0.001974	0.004929	No
BIS Motor subscale	21806	Current ms	0	0.2598	0.2581	1.006	0.3142	0.04426	0.01931	1.002	0.006466	0.3114	0.004787	No
BIS Nonplanning subscale	21786	Current ms	0	0.2821	0.2832	0.996	0.3193	0.06566	0.02535	1.008	0.007344	0.4096	0.005344	No
Nucleus Accumbens Volume	13171	Hibar et al, 2015	25607358	-0.2979	0.305	-0.9767	0.3287	0.08274	0.03534	0.9812	0.006673	0.006197	0.005585	No
Hippocampus Volume	13171	Hibar et al, 2015	25607358	-0.194	0.2205	-0.8795	0.3791	0.149	0.04159	0.9857	0.006932	0.003631	0.005069	No
Smoking Age Onset	47961	Furberg et al, 2010	20418890	-0.2322	0.275	-0.8443	0.3985	0.03036	0.009272	1	0.006512	0.0005144	0.005394	No
Bipolar Disorder	16731	Sklar et al, 2011	21926972	-0.09498	0.1261	-0.7531	0.4514	0.5027	0.05102	1.005	0.009661	0.00635	0.006702	No
Major Depressive Disorder	18759	Ripke et al, 2013	22472876	0.1364	0.1821	0.7491	0.4538	0.1494	0.02899	1.016	0.008483	0.009471	0.006213	No
Childhood Obesity	13848	Bradfield et al, 2012	22484627	0.08665	0.1159	0.7479	0.4545	0.4275	0.0437	0.9179	0.007643	0.003238	0.004719	No
BMI	339224	Locke et al, 2015	25673413	0.05908	0.07925	0.7455	0.456	0.144	0.007227	0.766	0.00849	0.007517	0.005585	No
Intracranial brain volume	13171	Hibar et al, 2015	25607358	-0.1258	0.1693	-0.7433	0.4573	0.1777	0.04612	1.002	0.007026	0.004078	0.004548	No
Obesity	98697	Berndt et al, 2013	23563607	0.02788	0.08361	0.3335	0.7388	0.1705	0.009272	0.7978	0.008844	0.008344	0.005818	No
Childhood IQ	12441	Benyamin et al, 2014	23358156	0.0492	0.1676	0.2935	0.7691	0.2798	0.04497	1	0.009366	-0.006312	0.005874	No
Former smoker	70675	Furberg et al, 2010	20418890	0.04358	0.1881	0.2317	0.8168	0.03544	0.006286	1.003	0.006437	-0.007794	0.00498	No
Alcohol consumption	70460	Schumann et al 2016	27911795	0.06519	0.3079	0.2117	0.8323	0.04647	0.01245	1.014	0.0128	0.001614	0.007728	No
Schizophrenia	77096	Ripke et al, 2014	25056061	0.01461	0.07267	0.201	0.8407	0.4725	0.01978	1.039	0.01347	0.005405	0.006973	No
UPPSP Sensation Seeking	22774	Current ms	0	-0.0336	0.2076	-0.162	0.8713	0.0796	0.0235	1.0065	0.0067	0.0206	0.0049	No
UPPSP Perseverance	22861	Current ms	0	-0.02709	0.2082	-0.1301	0.8965	0.0796	0.02354	1.006	0.006734	0.09187	0.004806	No
Caudate Volume	13171	Hibar et al, 2015	25607358	0.01679	0.1418	0.1184	0.9057	0.253	0.0359	0.9676	0.00622	-0.001481	0.004951	No
Alcohol Dependence	7280	Gelernter et al 2014	24166409	-0.009189	0.3499	-0.02627	0.979	0.08026	0.06717	1.049	0.007089	0.005373	0.005324	No
UPPSP Premeditation	22795	Current ms	0	0.0038	0.2059	0.0185	0.9853	0.0738	0.0208	1.0011	0.0068	0.097	0.0048	No

## Sheet: F3.6.rg.Persev
Figure 3-6. Genetic correlations between UPPSP Perseverance and several traits: neuropsychiatric, smoking, personality, cognition, anthropomorphic.
Phenotype	Sample Size	Reference	PMID	Genetic correlation (rg)	Standard error	Z score	P value	h2_obs	h2_obs_SE	h2_intercept	h2_interc_SE	gcov	gcov_SE	FDR < 0.05
Years of Education	293723	Okbay et al, 2016a	27225129	0.2812	0.06893	4.08	4.498e-05	0.1259	0.004528	0.9298	0.01016	-0.006066	0.005384	Yes
College attainment	95427	Rietveld et al, 2013	23722424	0.3923	0.1212	3.237	0.001206	0.1054	0.007482	1.021	0.008621	-0.003216	0.006148	Yes
Cognitive performance	106736	Rietveld et al, 2014	25201988	0.3702	0.12	3.086	0.00203	0.1068	0.007363	1.027	0.009089	-0.005201	0.006621	Yes
AUDIT total score	141958	Sanchez-Roige et al 2018	https://doi.org/10.1101/275917	0.2959	0.098	3.0193	0.0025335	0.0772	0.019	0.9992	0.0063	-0.0041	0.0049	Yes
AUDIT-C	121604	Sanchez-Roige et al 2018	https://doi.org/10.1101/275917	0.2943	0.0996	2.9534	0.0031434	0.0772	0.019	0.9992	0.0063	-0.0046	0.0049	Yes
Alcohol dependence PGC	52848	Walters et al 2018	biorXiv	0.4492	0.1796	2.5	0.01241	0.05796	0.01186	1.018	0.006292	-0.009175	0.00465	No
Smoking Age Onset	47961	Furberg et al, 2010	20418890	0.5016	0.2057	2.439	0.01473	0.03125	0.009228	0.9992	0.006231	-0.0125	0.004357	No
AUDIT-P	121604	Sanchez-Roige et al 2018	https://doi.org/10.1101/275917	0.2576	0.1079	2.386	0.017031	0.0772	0.019	0.9992	0.0063	-0.0015	0.0048	No
Childhood IQ	12441	Benyamin et al, 2014	23358156	0.3725	0.1562	2.384	0.01711	0.2763	0.0452	1.001	0.009117	-0.004487	0.006083	No
Neuroticism Smith	106716	Smith et al, 2016	27067015	-0.2123	0.09119	-2.328	0.01993	0.126	0.01143	0.9904	0.01105	0.007064	0.005206	No
UPPSP Premeditation	22774	Current ms	0	0.4834	0.2086	2.317	0.02052	0.0452	0.01989	1.003	0.006315	0.3857	0.005463	No
Neuroticism	170911	Okbay et al, 2016b	27089181	-0.1751	0.08155	-2.147	0.03179	0.08919	0.007466	0.9892	0.01182	0.004506	0.005003	No
BIS Attentional Subscale	21876	Current ms	0	0.4388	0.2179	2.013	0.04408	0.05409	0.02232	1.012	0.006908	0.2178	0.004979	No
Cannabis lifetime use	32330	Stringer et al, 2016	27023175	0.2979	0.1588	1.875	0.06074	0.0884	0.01652	1	0.006918	-0.005772	0.00495	No
Alcohol consumption	70460	Schumann et al 2016	27911795	0.333	0.1868	1.783	0.07466	0.04716	0.01221	1.013	0.0114	-0.001062	0.007013	No
Alcohol consumption UKBB	112117	Clarke et al 2017	28937693	0.1701	0.09545	1.782	0.07469	0.07954	0.006257	1.012	0.008096	-0.003974	0.005033	No
BIS Total score	21495	Current ms	0	0.3006	0.2093	1.437	0.1508	0.06638	0.0223	1.008	0.006917	0.2933	0.005317	No
Autism spectrum disorder	10263	ASD PGC Working group	https://www.med.unc.edu/pgc/results-and-downloads	0.168	0.1178	1.426	0.1537	0.4439	0.05424	0.9675	0.00797	0.001249	0.004657	No
Hippocampus Volume	13171	Hibar et al, 2015	25607358	0.2864	0.2042	1.403	0.1607	0.142	0.03898	0.9872	0.00652	-0.005698	0.00502	No
Major Depressive Disorder	18759	Ripke et al, 2013	22472876	0.2564	0.1838	1.395	0.1629	0.1549	0.0298	1.013	0.008351	-0.004995	0.006738	No
Height	253288	Wood et al, 2014	25282103	0.07738	0.05697	1.358	0.1744	0.3423	0.01764	1.228	0.03013	0.005406	0.006277	No
Smoking Lifetime Use	74035	Furberg et al, 2010	20418890	0.1505	0.1175	1.28	0.2004	0.07432	0.00661	0.9979	0.006023	-0.003588	0.004751	No
Intracranial brain volume	13171	Hibar et al, 2015	25607358	0.2308	0.1921	1.201	0.2297	0.1755	0.04377	1.002	0.006597	-0.003291	0.004665	No
ADHD	53293	Demontis et al, 2017	https://doi.org/10.1101/145581	-0.1191	0.1184	-1.006	0.3144	0.2346	0.01561	1.036	0.01022	0.002305	0.006913	No
Anorexia Nervosa	17767	Boraska et al 2014	24514567	-0.1577	0.1574	-1.002	0.3165	0.1899	0.03089	1.011	0.007754	0.0006399	0.004982	No
BIS Motor subscale	21806	Current ms	0	0.2498	0.2632	0.949	0.3426	0.04426	0.01931	1.002	0.006466	0.1545	0.004977	No
Former smoker	70675	Furberg et al, 2010	20418890	0.1351	0.1556	0.8686	0.3851	0.03583	0.006097	1.002	0.006546	-0.002402	0.004604	No
Depressive Symptoms	161460	Okbay et al, 2016b	27089181	-0.09257	0.1108	-0.8354	0.4035	0.04694	0.003643	1.001	0.00702	0.004016	0.004853	No
Alcohol Dependence	7280	Gelernter et al 2014	24166409	-0.2484	0.3238	-0.7671	0.443	0.0849	0.06109	1.048	0.006632	0.0006996	0.004769	No
Delay discounting	23127	Sanchez-Roige et al 2017	29230059	-0.1638	0.2135	-0.767	0.4431	0.07399	0.01799	1.012	0.006701	0.01136	0.004939	No
Childhood Obesity	13848	Bradfield et al, 2012	22484627	0.06102	0.1042	0.5855	0.5582	0.4129	0.04498	0.9221	0.007454	-0.002217	0.004697	No
BIS Nonplanning subscale	21786	Current ms	0	0.1431	0.2539	0.5637	0.5729	0.06566	0.02535	1.008	0.007344	0.3225	0.005902	No
Caudate Volume	13171	Hibar et al, 2015	25607358	0.07631	0.1397	0.5461	0.585	0.2504	0.03902	0.9683	0.006068	-0.00196	0.004777	No
Drug Experimentation	22572	Current ms	0	0.09511	0.1822	0.5219	0.6017	0.1116	0.02421	0.9973	0.007302	0.07647	0.005289	No
Obesity	98697	Berndt et al, 2013	23563607	0.04081	0.07997	0.5103	0.6098	0.1701	0.009585	0.7989	0.008619	-0.001502	0.005665	No
Schizophrenia	77096	Ripke et al, 2014	25056061	0.02793	0.06634	0.421	0.6738	0.4717	0.01922	1.039	0.01232	-0.006545	0.006491	No
UPPSP Positive Urgency	22738	Current ms	0	-0.07554	0.2113	-0.3576	0.7207	0.06818	0.02323	1.004	0.006723	0.121	0.004707	No
Nucleus Accumbens Volume	13171	Hibar et al, 2015	25607358	0.07946	0.2487	0.3195	0.7493	0.09043	0.03596	0.9792	0.006399	0.001698	0.004754	No
Extraversion	63,030	van den Berg et al, 2016	26362575	-0.02979	0.1363	-0.2186	0.827	0.0193	0.003194	1.004	0.006796	-0.002891	0.004426	No
UPPSP Negative Urgency	22795	Current ms	0	-0.02709	0.2082	-0.1301	0.8965	0.0796	0.02354	1.006	0.006734	0.09187	0.004806	No
Bipolar Disorder	16731	Sklar et al, 2011	21926972	-0.01476	0.1153	-0.128	0.8981	0.5041	0.05053	1.004	0.009324	0.005343	0.006451	No
Daily cigarettes	68028	Furberg et al, 2010	20418890	-0.01715	0.159	-0.1079	0.9141	0.03389	0.008492	1.005	0.006059	0.0001076	0.004716	No
UPPSP Sensation Seeking	22774	Current ms	0	0.0107	0.1746	0.06126	0.9512	0.08108	0.02108	1.006	0.006696	-0.03634	0.004458	No
BMI	339224	Locke et al, 2015	25673413	-0.0007227	0.06746	-0.01071	0.9915	0.1434	0.007318	0.7672	0.008047	0.004519	0.004887	No
Subjective Wellbeing	298420	Okbay et al, 2016b	27089181	0.0005256	0.1028	0.005113	0.9959	0.02516	0.002036	1	0.007258	-0.002636	0.005239	No

## Sheet: F3.7.rg.BIStotal
Figure 3-7. Genetic correlations between BIS Total and several traits: neuropsychiatric, smoking, personality, cognition, anthropomorphic.
Phenotype	Sample Size	Reference	PMID	Genetic correlation (rg)	Standard error	Z score	P value	h2_obs	h2_obs_SE	h2_intercept	h2_interc_SE	gcov	gcov_SE	FDR < 0.05
BIS Nonplanning subscale	21786	Current ms	0	0.9062	0.05338	16.98	1.217e-64	0.06624	0.02535	1.007	0.007339	0.8713	0.006608	Yes
BIS Attentional Subscale	21876	Current ms	0	0.9004	0.08051	11.18	4.861e-29	0.05516	0.02235	1.011	0.006968	0.7773	0.006193	Yes
BIS Motor subscale	21806	Current ms	0	0.9915	0.1052	9.422	4.407e-21	0.044	0.01933	1.002	0.00643	0.744	0.005703	Yes
UPPSP Premeditation	22774	Current ms	0	0.8347	0.1686	4.95	7.436e-07	0.04573	0.01985	1.003	0.006244	0.5538	0.005502	Yes
ADHD	53293	Demontis et al, 2017	https://doi.org/10.1101/145581	0.5151	0.1227	4.198	2.692e-05	0.2376	0.01595	1.032	0.01065	-0.002807	0.006445	Yes
AUDIT-P	121604	Sanchez-Roige et al 2018	https://doi.org/10.1101/275917	0.4776	0.1245	3.8364	0.00012484	0.0663	0.0238	1.0078	0.007	-0.0003	0.0051	Yes
Smoking Lifetime Use	74035	Furberg et al, 2010	20418890	0.5364	0.1659	3.234	0.001222	0.07247	0.006733	1	0.0063	-0.006484	0.0047	Yes
Cannabis lifetime use	32330	Stringer et al, 2016	27023175	0.604	0.195	3.097	0.001958	0.0892	0.01554	1	0.006499	-0.002352	0.004952	Yes
Alcohol dependence PGC	52848	Walters et al 2018	biorXiv	0.6791	0.22	3.0868	0.002	0.0557	0.0122	1.0195	0.0063	-0.008	0.0049	Yes
UPPSP Positive Urgency	22738	Current ms	0	0.5404	0.1759	3.071	0.00213	0.06531	0.02323	1.008	0.006932	0.492	0.005178	Yes
Years of Education	293723	Okbay et al, 2016a	27225129	-0.2363	0.08242	-2.867	0.004149	0.1246	0.004545	0.9363	0.01045	-0.01102	0.005857	Yes
Depressive Symptoms	161460	Okbay et al, 2016b	27089181	0.3249	0.1182	2.749	0.005974	0.04666	0.003973	1.002	0.007817	0.005293	0.004793	Yes
AUDIT total score	141958	Sanchez-Roige et al 2018	https://doi.org/10.1101/275917	0.3044	0.1118	2.7217	0.0064943	0.0663	0.0238	1.0078	0.007	-0.0063	0.0053	Yes
Drug Experimentation	22572	Sanchez-Roige et al In preparation	0	0.499	0.1835	2.719	0.006552	0.1118	0.02418	0.9972	0.007223	0.2109	0.004974	Yes
Neuroticism	170911	Okbay et al, 2016b	27089181	0.3014	0.1173	2.569	0.01019	0.09033	0.008152	0.9853	0.01355	0.009196	0.005854	Yes
Childhood IQ	12441	Benyamin et al, 2014	23358156	-0.5002	0.2001	-2.5	0.01241	0.2783	0.04483	1.001	0.009375	0.004637	0.005631	Yes
Cognitive performance	106736	Rietveld et al, 2014	25201988	-0.3079	0.1249	-2.465	0.0137	0.1075	0.007649	1.025	0.009419	-0.001336	0.006032	Yes
Delay discounting	23127	Sanchez-Roige et al 2017	29230059	0.4917	0.204	2.41	0.01593	0.07362	0.018	1.012	0.006699	0.1366	0.004679	Yes
Subjective Wellbeing	298420	Okbay et al, 2016b	27089181	-0.3322	0.1394	-2.382	0.01721	0.02454	0.002121	1.004	0.007835	-0.000727	0.005454	Yes
UPPSP Negative Urgency	22795	Current ms	0	0.4585	0.2078	2.207	0.02733	0.07995	0.02339	1.006	0.006726	0.4623	0.005027	No
AUDIT-C	121604	Sanchez-Roige et al 2018	https://doi.org/10.1101/275917	0.2478	0.1148	2.1585	0.030889	0.0663	0.0238	1.0078	0.007	-0.0071	0.0051	No
Alcohol consumption UKBB	112117	Clarke et al 2017	28937693	0.2468	0.118	2.0916	0.0365	0.0807	0.0057	1.0098	0.0073	-0.005	0.0049	No
College attainment	95427	Rietveld et al, 2013	23722424	-0.2791	0.136	-2.052	0.04017	0.1057	0.007355	1.02	0.008327	0.001235	0.006125	No
Major Depressive Disorder	18759	Ripke et al, 2013	22472876	0.4303	0.2178	1.975	0.04822	0.1511	0.02868	1.015	0.008336	-8.548e-06	0.006064	No
Neuroticism Smith	106716	Smith et al, 2016	27067015	0.2132	0.121	1.762	0.07806	0.1265	0.009458	0.9889	0.01037	0.01605	0.005461	No
Extraversion	63,030	van den Berg et al, 2016	26362575	0.284	0.1696	1.674	0.09406	0.01912	0.003206	1.005	0.006937	-0.007597	0.00476	No
Alcohol consumption	70460	Schumann et al 2016	27911795	0.3874	0.3019	1.283	0.1995	0.04597	0.0125	1.015	0.01279	-0.000183	0.007657	No
Daily cigarettes	68028	Furberg et al, 2010	20418890	0.2329	0.1923	1.211	0.2258	0.03502	0.008382	1.003	0.006662	0.0009647	0.004884	No
Bipolar Disorder	16731	Sklar et al, 2011	21926972	0.1679	0.1389	1.209	0.2266	0.5046	0.05018	1.004	0.009476	-0.006555	0.006379	No
UPPSP Sensation Seeking	22774	Current ms	0	0.2297	0.2022	1.136	0.2559	0.08149	0.02124	1.006	0.006723	0.09659	0.004571	No
Childhood Obesity	13848	Bradfield et al, 2012	22484627	0.1263	0.1132	1.115	0.2646	0.4272	0.04471	0.9179	0.007599	-0.001546	0.004407	No
Schizophrenia	77096	Ripke et al, 2014	25056061	0.08978	0.08105	1.108	0.268	0.473	0.01956	1.038	0.01305	0.004042	0.006314	No
UPPSP Perseverance	22861	Current ms	0	0.2392	0.2218	1.079	0.2808	0.07475	0.02091	1.001	0.006779	0.2999	0.00547	No
Former smoker	70675	Furberg et al, 2010	20418890	-0.1965	0.1923	-1.022	0.3068	0.03569	0.006362	1.002	0.006533	-0.001546	0.00445	No
Nucleus Accumbens Volume	13171	Hibar et al, 2015	25607358	0.2368	0.2727	0.8684	0.3852	0.08396	0.038	0.9809	0.006898	0.004822	0.004947	No
BMI	339224	Locke et al, 2015	25673413	0.07452	0.08675	0.859	0.3903	0.1439	0.007279	0.766	0.008236	0.007813	0.004537	No
Alcohol Dependence	7280	Gelernter et al 2014	24166409	0.2789	0.4387	0.6357	0.525	0.08192	0.0669	1.049	0.006993	-0.001974	0.005052	No
Autism spectrum disorder	10263	ASD PGC Working group	https://www.med.unc.edu/pgc/results-and-downloads	-0.09839	0.1553	-0.6336	0.5263	0.4361	0.05143	0.9689	0.007803	0.0002514	0.005048	No
Smoking Age Onset	47961	Furberg et al, 2010	20418890	0.1212	0.2263	0.5354	0.5924	0.03055	0.009353	0.9999	0.006336	-0.007833	0.004555	No
Height	253288	Wood et al, 2014	25282103	-0.02794	0.06147	-0.4545	0.6495	0.3407	0.01765	1.232	0.03476	-0.003615	0.007365	No
Anorexia Nervosa	17767	Boraska et al 2014	24514567	-0.072	0.1763	-0.4082	0.6832	0.0565	0.0238	1.0131	0.0073	0.0008	0.0051	No
Caudate Volume	13171	Hibar et al, 2015	25607358	-0.05321	0.1535	-0.3466	0.7289	0.2526	0.0369	0.9676	0.006113	0.00401	0.004699	No
Hippocampus Volume	13171	Hibar et al, 2015	25607358	0.04162	0.2049	0.2031	0.839	0.1471	0.04122	0.9862	0.006757	-0.0008076	0.005036	No
Intracranial brain volume	13171	Hibar et al, 2015	25607358	-0.03754	0.2032	-0.1847	0.8535	0.1764	0.04605	1.002	0.007208	-0.001697	0.005076	No
Obesity	98697	Berndt et al, 2013	23563607	0.01657	0.09646	0.1718	0.8636	0.1709	0.009241	0.7972	0.008694	0.009777	0.005357	No

## Sheet: F3.8.rg.BISAttention
Figure 3-8. Genetic correlations between BIS Attention and several traits: neuropsychiatric, smoking, personality, cognition, anthropomorphic.
Phenotype	Sample Size	Reference	PMID	Genetic correlation (rg)	Standard error	Z score	P value	h2_obs	h2_obs_SE	h2_intercept	h2_interc_SE	gcov	gcov_SE	FDR < 0.05
BIS Total score	21495	Current ms	0	0.9004	0.08051	11.18	4.861e-29	0.05516	0.02235	1.011	0.006968	0.7773	0.006193	Yes
BIS Motor subscale	21806	Current ms	0	1.0269	0.2468	4.1616	3.1605e-05	0.054	0.0224	1.0116	0.0069	0.3721	0.0049	Yes
UPPSP Premeditation	22774	Current ms	0	0.8237	0.2194	3.755	0.0001733	0.0451	0.01986	1.003	0.006313	0.333	0.004767	Yes
UPPSP Negative Urgency	22795	Current ms	0	0.6462	0.1915	3.374	0.0007416	0.0796	0.02354	1.006	0.006734	0.3948	0.005133	Yes
BIS Nonplanning subscale	21786	Current ms	0	0.5917	0.1906	3.105	0.001902	0.05398	0.02238	1.012	0.006936	0.5153	0.005357	Yes
Subjective Wellbeing	298420	Okbay et al, 2016b	27089181	-0.4934	0.1671	-2.953	0.003152	0.02468	0.002109	1.004	0.007996	-0.001048	0.004934	Yes
Neuroticism	170911	Okbay et al, 2016b	27089181	0.4105	0.1415	2.901	0.003714	0.09058	0.008	0.9843	0.01341	0.008578	0.00544	Yes
UPPSP Positive Urgency	22738	Current ms	0	0.5523	0.2083	2.651	0.008019	0.05398	0.02238	1.012	0.006936	0.3913	0.00498	Yes
ADHD	53293	Demontis et al, 2017	https://doi.org/10.1101/145581	0.4411	0.1698	2.598	0.009374	0.239	0.01579	1.031	0.01075	0.004394	0.006463	Yes
AUDIT-P	121604	Sanchez-Roige et al 2018	https://doi.org/10.1101/275917	0.3399	0.1328	2.5606	0.010451	0.0529	0.0225	1.012	0.0071	0.001	0.0049	Yes
Neuroticism Smith	106716	Smith et al, 2016	27067015	0.3388	0.1349	2.512	0.01201	0.1262	0.009508	0.9894	0.01034	0.01406	0.00454	Yes
Depressive Symptoms	161460	Okbay et al, 2016b	27089181	0.322	0.1476	2.181	0.02916	0.04702	0.003927	1.001	0.007752	0.005085	0.005	No
Smoking Lifetime Use	74035	Furberg et al, 2010	20418890	0.2683	0.1397	1.921	0.05477	0.07288	0.006554	0.9998	0.006243	-0.004561	0.004686	No
UPPSP Perseverance	22861	Current ms	0	0.4152	0.2204	1.884	0.05959	0.07376	0.0208	1.001	0.006775	0.2237	0.005018	No
AUDIT total score	141958	Sanchez-Roige et al 2018	https://doi.org/10.1101/275917	0.1855	0.1007	1.8417	0.06552	0.0529	0.0225	1.012	0.0071	-0.0029	0.0048	No
Extraversion	63,030	van den Berg et al, 2016	26362575	0.2886	0.1987	1.452	0.1464	0.01931	0.003276	1.004	0.006926	-0.01203	0.005123	No
AUDIT-C	121604	Sanchez-Roige et al 2018	https://doi.org/10.1101/275917	0.1523	0.1062	1.4338	0.15163	0.0529	0.0225	1.012	0.0071	-0.0042	0.0047	No
Major Depressive Disorder	18759	Ripke et al, 2013	22472876	0.3059	0.2347	1.304	0.1924	0.1492	0.02898	1.016	0.008484	0.001716	0.005737	No
Caudate Volume	13171	Hibar et al, 2015	25607358	0.1938	0.1737	1.116	0.2646	0.253	0.03589	0.9675	0.006217	-0.0002569	0.00456	No
Alcohol dependence PGC	52848	Walters et al 2018	biorXiv	0.2218	0.2072	1.0703	0.2845	0.0557	0.0119	1.0195	0.0064	-0.0011	0.0048	No
Cannabis lifetime use	32330	Stringer et al, 2016	27023175	0.1891	0.1829	1.034	0.3012	0.08916	0.01554	0.9999	0.006637	0.002886	0.004685	No
Height	253288	Wood et al, 2014	25282103	0.07098	0.06908	1.028	0.3042	0.3403	0.01759	1.233	0.03486	-0.01078	0.007224	No
UPPSP Sensation Seeking	22774	Current ms	0	0.218	0.2139	1.019	0.308	0.08108	0.02108	1.006	0.006696	0.05117	0.00459	No
Childhood IQ	12441	Benyamin et al, 2014	23358156	-0.2011	0.2107	-0.9541	0.3401	0.2798	0.04497	1	0.009366	0.003199	0.005733	No
Cognitive performance	106736	Rietveld et al, 2014	25201988	-0.1124	0.1359	-0.8271	0.4082	0.108	0.007864	1.024	0.009673	-0.002427	0.006192	No
College attainment	95427	Rietveld et al, 2013	23722424	-0.1059	0.1389	-0.7624	0.4458	0.1062	0.007555	1.019	0.008395	0.002639	0.006108	No
Anorexia Nervosa	17767	Boraska et al 2014	24514567	-0.1326	0.1787	-0.7422	0.4579	0.0526	0.0223	1.0123	0.0076	0.0056	0.0052	No
Autism spectrum disorder	10263	ASD PGC Working group	https://www.med.unc.edu/pgc/results-and-downloads	0.126	0.1713	0.7356	0.462	0.4357	0.05132	0.9691	0.007627	0.00242	0.005322	No
Daily cigarettes	68028	Furberg et al, 2010	20418890	0.1431	0.201	0.7116	0.4767	0.03462	0.008816	1.004	0.006777	0.0003751	0.004983	No
Schizophrenia	77096	Ripke et al, 2014	25056061	-0.06217	0.08865	-0.7012	0.4832	0.4725	0.01978	1.039	0.01347	0.003545	0.006624	No
Hippocampus Volume	13171	Hibar et al, 2015	25607358	0.1494	0.2229	0.67	0.5028	0.149	0.04159	0.9857	0.006928	-0.004104	0.004562	No
Drug Experimentation	22572	Current ms	0	0.1353	0.211	0.6413	0.5213	0.1116	0.02421	0.9973	0.007302	0.1419	0.004998	No
Intracranial brain volume	13171	Hibar et al, 2015	25607358	0.1543	0.252	0.6122	0.5404	0.1778	0.04611	1.002	0.007027	-0.0004137	0.005637	No
Bipolar Disorder	16731	Sklar et al, 2011	21926972	0.09616	0.1582	0.6078	0.5433	0.5024	0.05102	1.005	0.009656	-0.006806	0.006905	No
Delay discounting	23127	Sanchez-Roige et al 2017	29230059	-0.1458	0.2515	-0.5798	0.5621	0.07275	0.01878	1.013	0.006722	0.03827	0.004794	No
Alcohol consumption	70460	Schumann et al 2016	27911795	0.1448	0.2681	0.5401	0.5891	0.04645	0.01245	1.014	0.01281	0.001579	0.007643	No
BMI	339224	Locke et al, 2015	25673413	0.04712	0.09926	0.4747	0.635	0.144	0.007226	0.766	0.008488	0.001973	0.005242	No
Nucleus Accumbens Volume	13171	Hibar et al, 2015	25607358	0.1425	0.3095	0.4604	0.6452	0.08279	0.03533	0.9812	0.006671	0.006822	0.004856	No
Childhood Obesity	13848	Bradfield et al, 2012	22484627	0.05302	0.1274	0.4161	0.6773	0.4269	0.04369	0.918	0.007624	0.001701	0.004609	No
Alcohol consumption UKBB	112117	Clarke et al 2017	28937693	0.0405	0.1172	0.3456	0.7297	0.0809	0.0059	1.0092	0.0076	0.0006	0.0053	No
Former smoker	70675	Furberg et al, 2010	20418890	0.06036	0.1925	0.3136	0.7539	0.03545	0.00628	1.003	0.006428	-0.003619	0.004358	No
Years of Education	293723	Okbay et al, 2016a	27225129	-0.02188	0.07345	-0.2978	0.7658	0.1248	0.004515	0.9352	0.01075	-0.008793	0.005533	No
Alcohol Dependence	7280	Gelernter et al 2014	24166409	0.134	0.5074	0.2641	0.7917	0.08111	0.06709	1.049	0.007075	-0.001442	0.005378	No
Smoking Age Onset	47961	Furberg et al, 2010	20418890	-0.04163	0.2685	-0.155	0.8768	0.03039	0.009268	1	0.006505	-0.004286	0.004933	No
Obesity	98697	Berndt et al, 2013	23563607	-0.002633	0.1056	-0.02493	0.9801	0.1705	0.009273	0.7978	0.008843	0.00334	0.005403	No

[truncated: 8 more sheets: F3.9.rg.BISmotor, F3.10.rg.BISNonplanning, F3.11.rg.DrugExp, F4.1.r.Pheno.Correlations.UPPSP, F4.2.r.Pheno.Correlations.BIS, F4.3.r.Pheno.Correlations.Drug, F4.4.r.pvalues, F4.5.rg.pvalues]
